# Supplementary material for: Endothelial and systemic upregulation of miR-34a-5p fine-tunes senescence in progeria
Source: Aging (Albany NY). 2022 Jan 12;14(1):195–224. doi: 10.18632/aging.203820 (PMC8791216; doi:10.18632/aging.203820)
Supplement: Supplementary Table 1 [file aging-14-203820-s002.xlsx]

## Sheet: Upreg genes Prog-Tg vs WT 
Table 1- Upregulated mRNA Prog-Tg/WT
ID	FC	Log2FC	P.Value	adj.P.Val	MGI_symbol
ENSMUSG00000103135	22.2942	4.47859	0.00402351	0.999997	Gm37979
ENSMUSG00000044162	27.8081	4.79743	0.0105097	0.999997	Tnip3
ENSMUSG00000055561	12.4088	3.63329	0.00243409	0.999997	Spink5
ENSMUSG00000031289	20.5664	4.36222	0.0180739	0.999997	Il13ra2
ENSMUSG00000026343	17.058	4.09238	0.0144033	0.999997	Gpr39
ENSMUSG00000027022	14.9804	3.905	0.0131625	0.999997	Xirp2
ENSMUSG00000050397	10.9264	3.44974	0.00447117	0.999997	Foxl2
ENSMUSG00000032496	13.6102	3.76662	0.013135	0.999997	Ltf
ENSMUSG00000029695	10.7516	3.42648	0.00705917	0.999997	Aass
ENSMUSG00000096960	9.71007	3.27948	0.00188473	0.999997	A230028O05Rik
ENSMUSG00000037086	21.4541	4.42318	0.0262195	0.999997	Prr32
ENSMUSG00000021750	12.6527	3.66137	0.0167503	0.999997	Fam107a
ENSMUSG00000027919	27.7696	4.79543	0.0307198	0.999997	Lce1g
ENSMUSG00000071550	12.0361	3.5893	0.0190138	0.999997	Cfap44
ENSMUSG00000043773	9.41369	3.23476	0.00779813	0.999997	1700048O20Rik
ENSMUSG00000037977	9.49709	3.24749	0.00822992	0.999997	6430571L13Rik
ENSMUSG00000026166	15.2613	3.93181	0.0269854	0.999997	Ccl20
ENSMUSG00000044313	9.16872	3.19672	0.00764191	0.999997	Mab21l3
ENSMUSG00000026678	9.64447	3.2697	0.0122792	0.999997	Rgs5
ENSMUSG00000030187	8.85752	3.1469	0.00388764	0.999997	Klra2
ENSMUSG00000021728	8.6741	3.11671	0.00855422	0.999997	Emb
ENSMUSG00000050395	18.9152	4.24147	0.0338599	0.999997	Tnfsf15
ENSMUSG00000012350	9.41063	3.23429	0.0189447	0.999997	Ehf
ENSMUSG00000047746	9.10269	3.18629	0.0165146	0.999997	Fbxo40
ENSMUSG00000084984	8.17192	3.03068	0.00394834	0.999997	Far1os
ENSMUSG00000045201	26.4548	4.72546	0.039724	0.999997	Lrrc3b
ENSMUSG00000056054	9.35591	3.22588	0.0209764	0.999997	S100a8
ENSMUSG00000086531	8.15122	3.02702	0.00611876	0.999997	Gm11351
ENSMUSG00000043333	17.4556	4.12561	0.0349133	0.999997	Rhbdl2
ENSMUSG00000022123	19.0329	4.25042	0.0382446	0.999997	Scel
ENSMUSG00000028528	7.75295	2.95475	0.00532089	0.999997	Dnajc6
ENSMUSG00000027261	8.70858	3.12244	0.0232008	0.999997	Hao1
ENSMUSG00000029378	8.26745	3.04744	0.019094	0.999997	Areg
ENSMUSG00000024905	7.19522	2.84704	0.00482319	0.999997	Mtl5
ENSMUSG00000090216	8.20307	3.03616	0.0194837	0.999997	Gm16549
ENSMUSG00000068859	7.63278	2.93221	0.0123308	0.999997	Sp9
ENSMUSG00000058427	12.8435	3.68297	0.0386007	0.999997	Cxcl2
ENSMUSG00000017868	7.80656	2.96469	0.0175081	0.999997	Sgk2
ENSMUSG00000097981	6.94913	2.79683	0.00976419	0.999997	Gm7583
ENSMUSG00000030468	8.33823	3.05974	0.0303568	0.999997	Siglecg
ENSMUSG00000039742	6.83055	2.772	0.0105885	0.999997	Fam71f1
ENSMUSG00000050663	7.06732	2.82116	0.0132166	0.999997	Trhde
ENSMUSG00000008658	8.9852	3.16755	0.0347952	0.999997	Rbfox1
ENSMUSG00000027599	6.48205	2.69645	0.00714182	0.999997	Armc1
ENSMUSG00000090602	6.39455	2.67684	0.0115771	0.999997	Gm5611
ENSMUSG00000020963	6.87862	2.78212	0.0228164	0.999997	Tshr
ENSMUSG00000029134	6.2879	2.65258	0.0123316	0.999997	Plb1
ENSMUSG00000031497	7.02281	2.81205	0.0302126	0.999997	Tnfsf13b
ENSMUSG00000079138	6.5094	2.70252	0.0218122	0.999997	Gm8818
ENSMUSG00000002565	8.31539	3.05578	0.0436326	0.999997	Scin
ENSMUSG00000106746	8.20664	3.03679	0.0413295	0.999997	2900064F13Rik
ENSMUSG00000085766	6.86278	2.77879	0.0304684	0.999997	2810430I11Rik
ENSMUSG00000073805	5.85689	2.55013	0.00755186	0.999997	Fam196a
ENSMUSG00000045104	6.64743	2.7328	0.0327991	0.999997	Gm5514
ENSMUSG00000015354	6.37071	2.67146	0.028679	0.999997	Pcolce2
ENSMUSG00000042717	7.48309	2.90363	0.0443456	0.999997	Ppp1r3a
ENSMUSG00000035775	7.69894	2.94466	0.0460881	0.999997	Krt20
ENSMUSG00000022148	5.85266	2.54909	0.0169402	0.999997	Fyb
ENSMUSG00000086898	6.11285	2.61185	0.0250121	0.999997	Itpr3os
ENSMUSG00000027399	6.29727	2.65473	0.0303781	0.999997	Il1a
ENSMUSG00000091712	7.21167	2.85033	0.0450074	0.999997	Sec14l5
ENSMUSG00000022805	5.55573	2.47398	0.0122579	0.999997	Maats1
ENSMUSG00000029380	7.44896	2.89704	0.0482412	0.999997	Cxcl1
ENSMUSG00000070732	5.4725	2.4522	0.0112388	0.999997	Rbm44
ENSMUSG00000087659	5.47236	2.45216	0.0110626	0.999997	Gm12606
ENSMUSG00000032726	5.4919	2.4573	0.0147219	0.999997	Bmp8a
ENSMUSG00000047507	5.52728	2.46657	0.020986	0.999997	Baiap3
ENSMUSG00000033837	6.95315	2.79767	0.0496285	0.999997	Foxh1
ENSMUSG00000017754	6.185	2.62877	0.0351864	0.999997	Pltp
ENSMUSG00000092344	6.23183	2.63966	0.0385917	0.999997	Hspe1-ps3
ENSMUSG00000030510	5.86996	2.55335	0.031472	0.999997	Cers3
ENSMUSG00000039543	5.85686	2.55013	0.0323715	0.999997	Cfap70
ENSMUSG00000002257	5.43783	2.44303	0.0241963	0.999997	Def6
ENSMUSG00000086976	5.18982	2.37569	0.0120299	0.999997	Gm12316
ENSMUSG00000042078	5.75242	2.52417	0.0346129	0.999997	Svop
ENSMUSG00000047344	5.90723	2.56248	0.0410252	0.999997	Lancl3
ENSMUSG00000028033	6.10095	2.60903	0.0451943	0.999997	Kcnq5
ENSMUSG00000007122	5.32509	2.41281	0.0273993	0.999997	Casq1
ENSMUSG00000021390	5.19844	2.37808	0.0215616	0.999997	Ogn
ENSMUSG00000074796	5.1291	2.35871	0.0214572	0.999997	Slc4a11
ENSMUSG00000034634	5.17973	2.37288	0.0242754	0.999997	Ly6d
ENSMUSG00000106696	5.2052	2.37995	0.0255073	0.999997	Gm42729
ENSMUSG00000034813	5.92643	2.56716	0.0486626	0.999997	Grip1
ENSMUSG00000022947	5.82246	2.54163	0.0470515	0.999997	Cbr3
ENSMUSG00000031877	4.94312	2.30542	0.0179025	0.999997	Ces2g
ENSMUSG00000100334	5.5319	2.46777	0.0447452	0.999997	C230024C17Rik
ENSMUSG00000084094	5.23943	2.38941	0.0346323	0.999997	Gm13961
ENSMUSG00000039252	5.42936	2.44078	0.0427102	0.999997	Lgi2
ENSMUSG00000064109	4.94332	2.30548	0.0279597	0.999997	Hcst
ENSMUSG00000085033	5.43267	2.44166	0.0453885	0.999997	Gm11646
ENSMUSG00000030074	4.98586	2.31784	0.0319198	0.999997	Gxylt2
ENSMUSG00000067085	5.02765	2.32988	0.034548	0.999997	Gm10197
ENSMUSG00000107168	4.92059	2.29883	0.0324446	0.999997	Gm42507
ENSMUSG00000063415	5.39127	2.43062	0.0492095	0.999997	Cyp26b1
ENSMUSG00000020080	4.56437	2.19042	0.0242908	0.999997	Hkdc1
ENSMUSG00000006411	4.74108	2.24522	0.0376191	0.999997	Nectin4
ENSMUSG00000086578	4.46292	2.15799	0.0220712	0.999997	Gm13583
ENSMUSG00000020875	4.70716	2.23486	0.037968	0.999997	Hoxb9
ENSMUSG00000060093	4.80779	2.26537	0.0452226	0.999997	Hist1h4a
ENSMUSG00000101942	4.78989	2.25999	0.0454293	0.999997	Gm19582
ENSMUSG00000055313	4.44887	2.15344	0.0284315	0.999997	Pgbd1
ENSMUSG00000027202	4.5651	2.19065	0.0353932	0.999997	Slc12a1
ENSMUSG00000052485	4.68592	2.22833	0.0456434	0.999997	Tmem171
ENSMUSG00000107355	4.52014	2.17637	0.0362979	0.999997	AI839979
ENSMUSG00000110234	4.62133	2.20831	0.0457279	0.999997	Gm45799
ENSMUSG00000027208	4.53609	2.18145	0.0426607	0.999997	Fgf7
ENSMUSG00000085731	4.48291	2.16444	0.0408251	0.999997	Gm16229
ENSMUSG00000014329	4.43548	2.14909	0.0394107	0.999997	Bicc1
ENSMUSG00000107035	4.20655	2.07264	0.0280631	0.999997	Ybx1-ps2
ENSMUSG00000097626	4.42815	2.1467	0.0460661	0.999997	4921504A21Rik
ENSMUSG00000091744	4.24504	2.08578	0.0381066	0.999997	Gm17732
ENSMUSG00000085166	4.13654	2.04842	0.0313972	0.999997	Gm15522
ENSMUSG00000073486	4.2375	2.08321	0.0392215	0.999997	Gm10518
ENSMUSG00000022054	4.0849	2.0303	0.0297512	0.999997	Nefm
ENSMUSG00000033644	4.06072	2.02173	0.0307648	0.999997	Piwil2
ENSMUSG00000109438	3.944	1.97966	0.0327143	0.999997	Gm45073
ENSMUSG00000107667	3.93885	1.97777	0.0322566	0.999997	C530044C16Rik
ENSMUSG00000026831	4.12833	2.04556	0.0477115	0.999997	1700007K13Rik
ENSMUSG00000074121	4.0912	2.03253	0.0479655	0.999997	Ntf5
ENSMUSG00000031298	4.09299	2.03316	0.0489036	0.999997	Adgrg2
ENSMUSG00000040003	3.8363	1.93972	0.030983	0.999997	Magi2
ENSMUSG00000037014	3.58151	1.84057	0.0271807	0.999997	Sstr4
ENSMUSG00000011008	3.51414	1.81317	0.0193382	0.999997	Mcoln2
ENSMUSG00000046908	3.63007	1.86	0.0361908	0.999997	Ltb4r1
ENSMUSG00000047712	3.69074	1.88391	0.0468757	0.999997	Ust
ENSMUSG00000068417	3.3088	1.72631	0.0196436	0.999997	Pnp2
ENSMUSG00000020135	3.38675	1.7599	0.0475086	0.999997	Apc2
ENSMUSG00000021260	3.30419	1.7243	0.0478181	0.999997	Hhipl1
ENSMUSG00000056220	3.12122	1.64211	0.0495189	0.999997	Pla2g4a
ENSMUSG00000073739	3.07272	1.61952	0.0462387	0.999997	Gm16287
ENSMUSG00000042942	3.08026	1.62305	0.0487762	0.999997	Greb1l

## Sheet: Downreg genes Prog-Tg vs WT 
Downregulated mRNA Prog-Tg/WT
ID	FC	Log2FC	P.Value	adj.P.Val	MGI_symbol
ENSMUSG00000021613	-26.1197	-4.70707	0.00928538	0.999997	Hapln1
ENSMUSG00000085925	-18.149	-4.18182	0.00989237	0.999997	Rtl1
ENSMUSG00000061171	-71.6813	-6.16352	0.0263967	0.999997	Slc38a11
ENSMUSG00000096938	-20.93	-4.3875	0.0246352	0.999997	9530052E02Rik
ENSMUSG00000020734	-25.6898	-4.68312	0.0303511	0.999997	Grin2c
ENSMUSG00000028716	-13.4651	-3.75116	0.020743	0.999997	Pdzk1ip1
ENSMUSG00000097083	-19.5594	-4.28979	0.0293211	0.999997	D930019O06Rik
ENSMUSG00000108255	-11.614	-3.5378	0.0231965	0.999997	Gm16499
ENSMUSG00000059412	-19.1215	-4.25712	0.0339493	0.999997	Fxyd2
ENSMUSG00000033740	-14.9698	-3.90398	0.0311205	0.999997	St18
ENSMUSG00000094686	-30.1051	-4.91194	0.0385354	0.999997	Ccl21a
ENSMUSG00000021763	-8.51435	-3.0899	0.00839322	0.999997	BC067074
ENSMUSG00000043496	-14.91	-3.89821	0.0320939	0.999997	Tril
ENSMUSG00000096549	-21.2854	-4.41179	0.0424841	0.999997	Prickle4
ENSMUSG00000050105	-9.62815	-3.26726	0.0297933	0.999997	Grrp1
ENSMUSG00000040694	-13.2242	-3.72511	0.0373037	0.999997	Apobec2
ENSMUSG00000023987	-25.3129	-4.6618	0.047398	0.999997	Pgc
ENSMUSG00000061524	-7.7564	-2.95539	0.0140791	0.999997	Zic2
ENSMUSG00000087100	-8.9434	-3.16082	0.0320589	0.999997	Gm14641
ENSMUSG00000019312	-13.9173	-3.79881	0.046962	0.999997	Grb7
ENSMUSG00000028072	-12.2305	-3.61241	0.0448857	0.999997	Ntrk1
ENSMUSG00000072875	-9.09604	-3.18524	0.0343505	0.999997	Gpr27
ENSMUSG00000027863	-8.08459	-3.01517	0.028906	0.999997	Cd2
ENSMUSG00000083495	-8.96538	-3.16436	0.034981	0.999997	Gm13877
ENSMUSG00000107966	-8.38413	-3.06766	0.0363146	0.999997	Gm44001
ENSMUSG00000105048	-6.44795	-2.68884	0.0115872	0.999997	Gm42966
ENSMUSG00000033174	-9.91698	-3.3099	0.0468818	0.999997	Mgll
ENSMUSG00000104632	-7.29288	-2.86649	0.0296526	0.999997	Gm42909
ENSMUSG00000030093	-7.6642	-2.93813	0.0322161	0.999997	Wnt7a
ENSMUSG00000032946	-7.43252	-2.89385	0.0356621	0.999997	Rasgrp2
ENSMUSG00000043458	-7.80277	-2.96399	0.0406145	0.999997	Pcdhb12
ENSMUSG00000048349	-6.55163	-2.71185	0.0271116	0.999997	Pou4f1
ENSMUSG00000026327	-7.61184	-2.92824	0.0386552	0.999997	Serpinb11
ENSMUSG00000031129	-5.73731	-2.52038	0.0200956	0.999997	Slc9a9
ENSMUSG00000047793	-6.79648	-2.76479	0.0441341	0.999997	Sned1
ENSMUSG00000017417	-6.03502	-2.59336	0.0304279	0.999997	Plxdc1
ENSMUSG00000102549	-7.16281	-2.84053	0.0489415	0.999997	Gm38137
ENSMUSG00000066705	-5.8421	-2.54649	0.0305382	0.999997	Fxyd6
ENSMUSG00000090637	-6.27155	-2.64882	0.0407905	0.999997	Gm6189
ENSMUSG00000096870	-6.1479	-2.62009	0.0423673	0.999997	Gm21816
ENSMUSG00000037989	-5.12461	-2.35744	0.00829363	0.999997	Wnk2
ENSMUSG00000084985	-5.69077	-2.50862	0.0332067	0.999997	Gm16135
ENSMUSG00000110986	-5.30469	-2.40727	0.0188929	0.999997	AC153970.1
ENSMUSG00000024935	-5.89978	-2.56066	0.0397831	0.999997	Slc1a1
ENSMUSG00000107835	-5.65645	-2.4999	0.0335211	0.999997	Gm43999
ENSMUSG00000077309	-5.50484	-2.4607	0.0328593	0.999997	n-R5s8
ENSMUSG00000107173	-5.33658	-2.41591	0.0251298	0.999997	Gm43266
ENSMUSG00000106603	-6.01806	-2.5893	0.0482939	0.999997	Gm43509
ENSMUSG00000027544	-5.77585	-2.53003	0.0437567	0.999997	Nfatc2
ENSMUSG00000033981	-5.09512	-2.34912	0.0221654	0.999997	Gria2
ENSMUSG00000034227	-5.504	-2.46048	0.0407227	0.999997	Foxj1
ENSMUSG00000037358	-5.46281	-2.44964	0.0388616	0.999997	4930578C19Rik
ENSMUSG00000045287	-5.25049	-2.39245	0.0340582	0.999997	Rtn4rl1
ENSMUSG00000047394	-4.85171	-2.27849	0.0254138	0.999997	Odf3b
ENSMUSG00000104990	-4.50668	-2.17207	0.0057253	0.999997	Gm43504
ENSMUSG00000032289	-4.71317	-2.2367	0.0282514	0.999997	Thsd4
ENSMUSG00000111131	-4.52294	-2.17726	0.0179054	0.999997	AC115297.1
ENSMUSG00000111197	-4.74724	-2.24709	0.0331297	0.999997	AC055818.1
ENSMUSG00000103805	-4.51811	-2.17572	0.0205507	0.999997	Gm37063
ENSMUSG00000044556	-4.37571	-2.12952	0.0140444	0.999997	Tex38
ENSMUSG00000030317	-4.6179	-2.20724	0.0339066	0.999997	Timp4
ENSMUSG00000034413	-4.29532	-2.10276	0.0246878	0.999997	Neurl1b
ENSMUSG00000089281	-4.19672	-2.06926	0.0210706	0.999997	Scarna6
ENSMUSG00000105553	-4.64408	-2.21539	0.0496636	0.999997	Gm42514
ENSMUSG00000036411	-4.11043	-2.03929	0.0165284	0.999997	9530077C05Rik
ENSMUSG00000091587	-4.0867	-2.03094	0.0213483	0.999997	Gm17191
ENSMUSG00000031028	-4.11621	-2.04132	0.0337976	0.999997	Tub
ENSMUSG00000034872	-4.14497	-2.05136	0.0485951	0.999997	Gipc3
ENSMUSG00000029167	-3.64858	-1.86734	0.0130577	0.999997	Ppargc1a
ENSMUSG00000105217	-3.91708	-1.96978	0.0474403	0.999997	Gm42873
ENSMUSG00000084644	-3.81257	-1.93076	0.0441645	0.999997	Gm24379
ENSMUSG00000105041	-3.79908	-1.92565	0.0435336	0.999997	Gm42676
ENSMUSG00000108291	-3.50378	-1.80891	0.0297	0.999997	Gm44292
ENSMUSG00000068601	-3.54781	-1.82693	0.0344972	0.999997	Gm10244
ENSMUSG00000049690	-3.22491	-1.68926	0.0178056	0.999997	Nckap5
ENSMUSG00000032186	-3.28623	-1.71644	0.0283136	0.999997	Tmod2
ENSMUSG00000018740	-3.33515	-1.73775	0.0384782	0.999997	Slc25a35
ENSMUSG00000104436	-3.31324	-1.72824	0.0370618	0.999997	Gm37423
ENSMUSG00000040254	-3.30192	-1.7233	0.0410628	0.999997	Sema3d
ENSMUSG00000037736	-3.22807	-1.69067	0.0434539	0.999997	Limch1
ENSMUSG00000077202	-3.24958	-1.70025	0.0472493	0.999997	Gm25612
ENSMUSG00000039115	-3.20092	-1.67849	0.0445371	0.999997	Itga9
ENSMUSG00000020193	-2.95419	-1.56276	0.0240844	0.999997	Zpbp
ENSMUSG00000006784	-2.75479	-1.46194	0.0422667	0.999997	Ttc25
ENSMUSG00000021187	-2.55802	-1.35503	0.024658	0.999997	Tc2n
ENSMUSG00000097440	-2.51489	-1.33049	0.0434249	0.999997	Gm6277
ENSMUSG00000105408	-2.48033	-1.31053	0.0449923	0.999997	Gm7285

## Sheet: Upreg genes LA-Tg vs WT
Upregulated mRNA La-Tg/WT
ID	FC	Log2FC	P.Value	adj.P.Val	MGI_symbol
ENSMUSG00000086976	6.395	2.67694	0.005743	0.999998	Gm12316
ENSMUSG00000070732	6.37315	2.67201	0.006693	0.999998	Rbm44
ENSMUSG00000044976	7.66443	2.93818	0.022768	0.999998	Wdr72
ENSMUSG00000106702	7.60893	2.92769	0.025179	0.999998	Gm42846
ENSMUSG00000036353	6.53984	2.70925	0.023767	0.999998	P2ry12
ENSMUSG00000076928	6.35845	2.66867	0.028017	0.999998	Trac
ENSMUSG00000096960	5.46915	2.45132	0.01568	0.999998	A230028O05Rik
ENSMUSG00000030187	5.54699	2.47171	0.01923	0.999998	Klra2
ENSMUSG00000078139	5.07572	2.34361	0.038051	0.999998	AK157302
ENSMUSG00000055653	4.75232	2.24863	0.031761	0.999998	Gpc3
ENSMUSG00000017868	5.54868	2.47214	0.048053	0.999998	Sgk2
ENSMUSG00000043773	5.28238	2.40119	0.044661	0.999998	1700048O20Rik
ENSMUSG00000044550	4.762	2.25157	0.03637	0.999998	Tceal3
ENSMUSG00000094344	4.626	2.20976	0.026017	0.999998	Gm11942
ENSMUSG00000108126	4.84851	2.27754	0.046497	0.999998	Gm43909
ENSMUSG00000097626	4.6722	2.2241	0.040404	0.999998	4921504A21Rik
ENSMUSG00000073486	4.50403	2.17122	0.033653	0.999998	Gm10518
ENSMUSG00000002076	4.15852	2.05607	0.013994	0.999998	Hsf2bp
ENSMUSG00000064109	4.44454	2.15203	0.04136	0.999998	Hcst
ENSMUSG00000024905	3.94515	1.98008	0.045822	0.999998	Mtl5
ENSMUSG00000093798	3.58265	1.84103	0.039351	0.999998	Gm8355
ENSMUSG00000082901	3.51688	1.81429	0.046713	0.999998	Gm14323
ENSMUSG00000052572	3.3069	1.72548	0.022228	0.999998	Dlg2
ENSMUSG00000084304	3.36425	1.75028	0.042254	0.999998	Gm6142
ENSMUSG00000083064	3.31188	1.72765	0.039179	0.999998	Gm7785

## Sheet: Downreg genes LA-Tg vs WT
Downregulated mRNA La-Tg/WT
ID	FC	logFC	P.Value	adj.P.Val	MGI_symbol
ENSMUSG00000113288	-10.4719	-3.38845	0.000800156	0.999998	AC164164.1
ENSMUSG00000021763	-11.2334	-3.48973	0.00934481	0.999998	BC067074
ENSMUSG00000109317	-8.70749	-3.12226	0.00697597	0.999998	Gm45041
ENSMUSG00000067356	-9.51571	-3.25031	0.0114423	0.999998	B430203G13Rik
ENSMUSG00000102989	-7.77199	-2.95828	0.00764037	0.999998	Gm38318
ENSMUSG00000049202	-8.45965	-3.0806	0.0108296	0.999998	4930515G13Rik
ENSMUSG00000042589	-7.53795	-2.91417	0.013504	0.999998	Cux2
ENSMUSG00000097178	-7.34417	-2.8766	0.0130389	0.999998	2310002F09Rik
ENSMUSG00000054256	-7.26959	-2.86187	0.0142931	0.999998	Msi1
ENSMUSG00000104060	-7.63378	-2.9324	0.0178357	0.999998	Gm37954
ENSMUSG00000099230	-6.46292	-2.69219	0.0100652	0.999998	Mir6989
ENSMUSG00000105217	-6.33202	-2.66267	0.0153734	0.999998	Gm42873
ENSMUSG00000084701	-6.66163	-2.73587	0.0249386	0.999998	n-R5s87
ENSMUSG00000104910	-9.39839	-3.23241	0.0357543	0.999998	Gm43331
ENSMUSG00000024186	-6.68478	-2.74088	0.0266087	0.999998	Rgs11
ENSMUSG00000085925	-8.6411	-3.11122	0.0359823	0.999998	Rtl1
ENSMUSG00000103146	-6.10114	-2.60908	0.0175651	0.999998	Gm37745
ENSMUSG00000102383	-6.65324	-2.73406	0.0291119	0.999998	Gm38142
ENSMUSG00000064796	-5.80961	-2.53844	0.0201928	0.999998	Terc
ENSMUSG00000083340	-6.01179	-2.58779	0.0233456	0.999998	Gm13156
ENSMUSG00000098199	-5.6593	-2.50062	0.0186334	0.999998	Gm9358
ENSMUSG00000102782	-5.69596	-2.50994	0.0204682	0.999998	Gm37625
ENSMUSG00000021974	-6.63178	-2.7294	0.0356436	0.999998	Fgf9
ENSMUSG00000113065	-6.36187	-2.66945	0.0322101	0.999998	AC131743.1
ENSMUSG00000086701	-5.13713	-2.36096	0.0174392	0.999998	Gm13595
ENSMUSG00000107966	-7.79878	-2.96325	0.048367	0.999998	Gm44001
ENSMUSG00000112637	-6.1884	-2.62957	0.0386709	0.999998	AC124346.3
ENSMUSG00000045912	-4.76033	-2.25106	0.0149801	0.999998	C2cd4c
ENSMUSG00000104400	-6.52721	-2.70647	0.0457722	0.999998	Gm38010
ENSMUSG00000105842	-5.16303	-2.36822	0.028123	0.999998	Gm43329
ENSMUSG00000101059	-6.38074	-2.67372	0.0449005	0.999998	Gm4017
ENSMUSG00000046854	-5.79301	-2.53431	0.0399507	0.999998	Pip5kl1
ENSMUSG00000089789	-4.93518	-2.3031	0.0261313	0.999998	Rdh1
ENSMUSG00000039238	-5.65792	-2.50027	0.0400147	0.999998	Zfp750
ENSMUSG00000106432	-6.22665	-2.63846	0.0464208	0.999998	Gm43259
ENSMUSG00000102380	-5.01636	-2.32664	0.0402682	0.999998	Gm38140
ENSMUSG00000104479	-5.33316	-2.41499	0.0441088	0.999998	Gm10305
ENSMUSG00000044122	-4.73254	-2.24261	0.031704	0.999998	Proca1
ENSMUSG00000040140	-4.55521	-2.18752	0.0202019	0.999998	Tdrd6
ENSMUSG00000097399	-4.73591	-2.24364	0.0351081	0.999998	Gm26555
ENSMUSG00000109435	-4.72249	-2.23955	0.0353475	0.999998	Gm7067
ENSMUSG00000037541	-4.72356	-2.23988	0.0359714	0.999998	Shank2
ENSMUSG00000104821	-4.9961	-2.3208	0.0490901	0.999998	Gm42481
ENSMUSG00000043794	-4.5126	-2.17396	0.0308945	0.999998	D830025C05Rik
ENSMUSG00000110558	-4.42888	-2.14694	0.0273092	0.999998	Gm45779
ENSMUSG00000113557	-4.70136	-2.23308	0.042899	0.999998	AC153143.2
ENSMUSG00000044574	-4.37487	-2.12924	0.0325785	0.999998	5031434C07Rik
ENSMUSG00000053693	-4.45704	-2.15609	0.0426699	0.999998	Mast1
ENSMUSG00000104571	-4.15349	-2.05432	0.0248508	0.999998	Gm43010
ENSMUSG00000102533	-4.20889	-2.07344	0.0346701	0.999998	Gm37226
ENSMUSG00000109008	-4.27914	-2.09732	0.0408432	0.999998	Gm44899
ENSMUSG00000103818	-4.12471	-2.04429	0.0296758	0.999998	Gm38009
ENSMUSG00000104292	-3.93575	-1.97664	0.016929	0.999998	Gm38042
ENSMUSG00000087790	-4.08865	-2.03163	0.0302383	0.999998	Gm25970
ENSMUSG00000024027	-4.1823	-2.0643	0.0420586	0.999998	Glp1r
ENSMUSG00000106468	-4.1084	-2.03858	0.0414138	0.999998	AC122844.1
ENSMUSG00000100394	-3.83741	-1.94013	0.0285133	0.999998	Gm28791
ENSMUSG00000108693	-3.81267	-1.9308	0.0408851	0.999998	Gm45153
ENSMUSG00000074824	-3.55036	-1.82797	0.01753	0.999998	Rslcan18
ENSMUSG00000003271	-3.39079	-1.76162	0.031452	0.999998	Sult2b1
ENSMUSG00000104293	-3.50045	-1.80754	0.0461393	0.999998	Gm38043
ENSMUSG00000030693	-2.84913	-1.51052	0.0249285	0.999998	Klk10
ENSMUSG00000010342	-2.86747	-1.51978	0.0495894	0.999998	Tex14

## Sheet: Upreg genes Prog-Tg vs LA-Tg
Upregulated mRNA Prog-Tg/LA-Tg
ID	FC	logFC	P.Value	adj.P.Val	MGI_symbol
ENSMUSG00000103135	24.5914	4.62008	0.0037536	1	Gm37979
ENSMUSG00000030074	18.1504	4.18193	0.0029732	1	Gxylt2
ENSMUSG00000100334	16.536	4.04754	0.0070598	1	C230024C17Rik
ENSMUSG00000062713	13.7155	3.77774	0.0021299	1	Sim2
ENSMUSG00000056054	15.9592	3.99632	0.0097474	1	S100a8
ENSMUSG00000039238	11.8247	3.56373	0.0046237	1	Zfp750
ENSMUSG00000038193	23.0097	4.52417	0.0263967	1	Hand2
ENSMUSG00000028132	11.3066	3.4991	0.0146182	1	Tmem56
ENSMUSG00000097754	15.967	3.99702	0.0238562	1	Ptgs2os2
ENSMUSG00000029334	15.251	3.93083	0.0223038	1	Prkg2
ENSMUSG00000026678	10.3842	3.37632	0.0107698	1	Rgs5
ENSMUSG00000025481	10.2365	3.35565	0.0104078	1	Urah
ENSMUSG00000002565	12.6347	3.65932	0.0224326	1	Scin
ENSMUSG00000031497	10.2584	3.35874	0.0153852	1	Tnfsf13b
ENSMUSG00000024678	18.9705	4.24569	0.033635	1	Ms4a4d
ENSMUSG00000056071	9.33978	3.22339	0.0134769	1	S100a9
ENSMUSG00000044676	11.799	3.5606	0.0248723	1	Zfp612
ENSMUSG00000027022	10.2447	3.35681	0.0210686	1	Xirp2
ENSMUSG00000091636	8.25462	3.0452	0.0068592	1	Akain1
ENSMUSG00000086531	8.20569	3.03662	0.0058711	1	Gm11351
ENSMUSG00000032726	8.08265	3.01483	0.0044422	1	Bmp8a
ENSMUSG00000102147	8.19268	3.03434	0.0071786	1	Gm38055
ENSMUSG00000098199	7.84373	2.97154	0.0057324	1	Gm9358
ENSMUSG00000109908	8.55102	3.0961	0.0168632	1	Gm45535
ENSMUSG00000024076	7.98478	2.99725	0.0117095	1	Vit
ENSMUSG00000040026	10.9115	3.44778	0.0314443	1	Saa3
ENSMUSG00000034810	21.0219	4.39382	0.0431969	1	Scn7a
ENSMUSG00000109317	7.59206	2.92449	0.0095082	1	Gm45041
ENSMUSG00000031289	10.8205	3.4357	0.0321608	1	Il13ra2
ENSMUSG00000073274	7.39504	2.88656	0.0070727	1	Gm14636
ENSMUSG00000097910	10.997	3.45903	0.0358456	1	5033428I22Rik
ENSMUSG00000057337	8.6705	3.11612	0.0285262	1	Chst3
ENSMUSG00000056457	7.48507	2.90401	0.0172169	1	Prl2c3
ENSMUSG00000045912	6.81655	2.76904	0.003244	1	C2cd4c
ENSMUSG00000044122	7.07331	2.82239	0.0075106	1	Proca1
ENSMUSG00000018927	11.9621	3.5804	0.0407245	1	Ccl6
ENSMUSG00000030162	7.43364	2.89407	0.0180433	1	Olr1
ENSMUSG00000029380	9.25382	3.21005	0.0327126	1	Cxcl1
ENSMUSG00000031786	6.94649	2.79628	0.0083906	1	Drc7
ENSMUSG00000044313	7.07421	2.82257	0.0131473	1	Mab21l3
ENSMUSG00000029778	12.4389	3.63679	0.0449558	1	Adcyap1r1
ENSMUSG00000049313	9.83594	3.29806	0.0364304	1	Sorl1
ENSMUSG00000077345	7.0274	2.81299	0.0133006	1	Snord70
ENSMUSG00000110084	9.58135	3.26023	0.0367119	1	Gm45257
ENSMUSG00000027399	7.23684	2.85536	0.0210454	1	Il1a
ENSMUSG00000028444	8.20941	3.03728	0.0313202	1	Cntfr
ENSMUSG00000017737	8.17706	3.03158	0.0309964	1	Mmp9
ENSMUSG00000054256	6.76913	2.75897	0.0170333	1	Msi1
ENSMUSG00000027208	6.68272	2.74044	0.0177825	1	Fgf7
ENSMUSG00000037977	6.58369	2.7189	0.0168403	1	6430571L13Rik
ENSMUSG00000028825	6.86925	2.78015	0.0243913	1	Rhd
ENSMUSG00000079049	6.90287	2.7872	0.0253377	1	Serpinb1c
ENSMUSG00000086681	7.13072	2.83405	0.0296121	1	Gm16178
ENSMUSG00000079092	8.25904	3.04597	0.0411061	1	Prl2c2
ENSMUSG00000089371	6.49174	2.69861	0.018205	1	Mir1938
ENSMUSG00000027457	7.9257	2.98654	0.0384162	1	Snph
ENSMUSG00000102782	6.24333	2.64232	0.0136093	1	Gm37625
ENSMUSG00000097993	5.9033	2.56152	0.0015399	1	Ptprv
ENSMUSG00000104060	6.62451	2.72781	0.0244833	1	Gm37954
ENSMUSG00000113288	5.94418	2.57148	0.0067603	1	AC164164.1
ENSMUSG00000105842	6.13873	2.61794	0.0150658	1	Gm43329
ENSMUSG00000026228	6.80796	2.76722	0.029241	1	Htr2b
ENSMUSG00000033227	7.10378	2.82859	0.0327413	1	Wnt6
ENSMUSG00000035187	8.80426	3.1382	0.049305	1	Nkx6-1
ENSMUSG00000111341	7.53359	2.91334	0.0393494	1	AC165080.3
ENSMUSG00000039252	6.59292	2.72092	0.0298135	1	Lgi2
ENSMUSG00000042717	7.52758	2.91219	0.0431361	1	Ppp1r3a
ENSMUSG00000072949	6.03941	2.59441	0.0193677	1	Acot1
ENSMUSG00000026343	7.17297	2.84257	0.04042	1	Gpr39
ENSMUSG00000047953	6.07296	2.6024	0.0217635	1	Gp5
ENSMUSG00000050217	6.12684	2.61514	0.0287767	1	Lgsn
ENSMUSG00000028528	5.57654	2.47937	0.0118436	1	Dnajc6
ENSMUSG00000102380	5.86515	2.55217	0.0241933	1	Gm38140
ENSMUSG00000047344	6.23605	2.64063	0.0341133	1	Lancl3
ENSMUSG00000040132	6.11315	2.61192	0.0322536	1	Svs2
ENSMUSG00000024401	6.20135	2.63258	0.0355521	1	Tnf
ENSMUSG00000086108	5.92405	2.56658	0.0296834	1	Gm5602
ENSMUSG00000058831	5.4525	2.44692	0.0186566	1	Opn1sw
ENSMUSG00000049928	6.14539	2.61951	0.0390913	1	Glp2r
ENSMUSG00000106468	5.35199	2.42008	0.0153341	1	AC122844.1
ENSMUSG00000046623	6.31861	2.65961	0.0436014	1	Gjb4
ENSMUSG00000052013	6.62205	2.72728	0.048862	1	Btla
ENSMUSG00000020892	6.52752	2.70654	0.0466814	1	Aloxe3
ENSMUSG00000105445	6.55938	2.71356	0.0476431	1	Gm42972
ENSMUSG00000047507	5.34165	2.41729	0.0220654	1	Baiap3
ENSMUSG00000021347	5.80938	2.53838	0.0396813	1	Prl7b1
ENSMUSG00000027599	5.08768	2.34701	0.015218	1	Armc1
ENSMUSG00000010342	4.89839	2.29231	0.0030858	1	Tex14
ENSMUSG00000112637	5.84321	2.54676	0.0423929	1	AC124346.3
ENSMUSG00000106432	6.04998	2.59693	0.0476007	1	Gm43259
ENSMUSG00000084701	5.59559	2.48429	0.037085	1	n-R5s87
ENSMUSG00000104400	6.08852	2.60609	0.0491542	1	Gm38010
ENSMUSG00000028976	5.54268	2.47058	0.0361283	1	Slc2a5
ENSMUSG00000034161	5.57052	2.47781	0.0374265	1	Scx
ENSMUSG00000109873	5.98988	2.58253	0.0494127	1	Gm45407
ENSMUSG00000101942	5.3578	2.42164	0.0331132	1	Gm19582
ENSMUSG00000102989	5.19576	2.37733	0.0276089	1	Gm38318
ENSMUSG00000032589	5.6796	2.50579	0.0461032	1	Bsn
ENSMUSG00000089663	5.05147	2.3367	0.0240265	1	Gm15651
ENSMUSG00000037541	5.07179	2.3425	0.0268194	1	Shank2
ENSMUSG00000024027	4.92591	2.30039	0.0224844	1	Glp1r
ENSMUSG00000105230	4.74017	2.24494	0.0193746	1	Gm42433
ENSMUSG00000104687	5.16014	2.36741	0.0387613	1	Gm42899
ENSMUSG00000086479	5.26985	2.39776	0.0427301	1	Gm16014
ENSMUSG00000085669	4.6172	2.20702	0.0188493	1	Gm14817
ENSMUSG00000053693	4.87062	2.2841	0.0310083	1	Mast1
ENSMUSG00000099707	5.197	2.37768	0.0444221	1	Gm8883
ENSMUSG00000083340	5.04062	2.3336	0.0389689	1	Gm13156
ENSMUSG00000031220	4.50253	2.17073	0.0202515	1	Awat2
ENSMUSG00000022805	4.4497	2.15371	0.0212098	1	Maats1
ENSMUSG00000107355	4.66518	2.22193	0.0319069	1	AI839979
ENSMUSG00000031298	4.68075	2.22674	0.0328833	1	Adgrg2
ENSMUSG00000001027	4.52713	2.1786	0.0274855	1	Scn4a
ENSMUSG00000022208	4.7125	2.23649	0.0367536	1	Jph4
ENSMUSG00000027068	5.00012	2.32196	0.0484657	1	Dhrs9
ENSMUSG00000030739	4.66355	2.22143	0.036881	1	Myh14
ENSMUSG00000107365	4.79073	2.26025	0.041513	1	Gm43479
ENSMUSG00000105124	4.33278	2.11529	0.0202702	1	Gm5297
ENSMUSG00000080971	4.48568	2.16533	0.0305757	1	Gm16128
ENSMUSG00000015354	4.75501	2.24945	0.0471067	1	Pcolce2
ENSMUSG00000050397	4.53259	2.18034	0.0396024	1	Foxl2
ENSMUSG00000073805	4.17071	2.06029	0.0210723	1	Fam196a
ENSMUSG00000027073	4.45988	2.15701	0.0407757	1	Prg2
ENSMUSG00000064125	4.54271	2.18355	0.0479812	1	Prr36
ENSMUSG00000086150	4.42988	2.14727	0.046423	1	Bach2os
ENSMUSG00000110558	4.16711	2.05904	0.0328504	1	Gm45779
ENSMUSG00000106856	4.31591	2.10967	0.0425251	1	Gm43761
ENSMUSG00000031762	4.03387	2.01216	0.0372273	1	Mt2
ENSMUSG00000105167	4.00569	2.00205	0.0376591	1	Snord43
ENSMUSG00000074121	4.12194	2.04332	0.0456752	1	Ntf5
ENSMUSG00000015890	3.82392	1.93505	0.0268779	1	Amdhd1
ENSMUSG00000086804	3.94378	1.97958	0.0389706	1	Gm43154
ENSMUSG00000024600	4.01363	2.00491	0.0464612	1	Slc27a6
ENSMUSG00000091730	3.9554	1.98382	0.0457853	1	Gm17230
ENSMUSG00000086578	3.76314	1.91194	0.0347798	1	Gm13583
ENSMUSG00000064115	3.68518	1.88174	0.0299028	1	Cadm2
ENSMUSG00000060981	3.53953	1.82356	0.0172197	1	Hist1h4h
ENSMUSG00000029348	3.83244	1.93826	0.0485223	1	Asphd2
ENSMUSG00000113185	3.59946	1.84778	0.0307918	1	AC124687.2
ENSMUSG00000107667	3.67055	1.876	0.0377376	1	C530044C16Rik
ENSMUSG00000038668	3.46789	1.79406	0.0300157	1	Lpar1
ENSMUSG00000099703	3.46737	1.79384	0.0456993	1	Gm28285
ENSMUSG00000074824	3.27574	1.71182	0.0249687	1	Rslcan18
ENSMUSG00000104293	3.40435	1.76738	0.0472567	1	Gm38043
ENSMUSG00000033826	3.35028	1.74428	0.045364	1	Dnah8
ENSMUSG00000068417	3.15705	1.65858	0.023673	1	Pnp2
ENSMUSG00000064778	3.05206	1.60979	0.0414415	1	Snord59a

## Sheet: Downreg genes Prog-Tg vs LA-Tg
Upregulated mRNA Prog-Tg/LA-Tg
ID	FC	logFC	P.Value	adj.P.Val	MGI_symbol
ENSMUSG00000108255	-19.701	-4.3002	0.007008	1	Gm16499
ENSMUSG00000090637	-15.4786	-3.95221	0.0033883	1	Gm6189
ENSMUSG00000039304	-10.2036	-3.351	0.0040381	1	Tnfsf10
ENSMUSG00000054003	-10.3983	-3.37827	0.022004	1	Tdrd9
ENSMUSG00000082145	-7.46039	-2.89925	0.0114179	1	Gm12312
ENSMUSG00000097083	-15.4677	-3.95119	0.0443309	1	D930019O06Rik
ENSMUSG00000096938	-14.7381	-3.88148	0.0462774	1	9530052E02Rik
ENSMUSG00000043122	-12.0102	-3.58619	0.0477228	1	A530016L24Rik
ENSMUSG00000050105	-8.30425	-3.05385	0.0430606	1	Grrp1
ENSMUSG00000022860	-6.4034	-2.67884	0.0286734	1	Chodl
ENSMUSG00000061524	-5.67469	-2.50454	0.0355922	1	Zic2
ENSMUSG00000041878	-5.39398	-2.43135	0.0269724	1	8430432A02Rik
ENSMUSG00000101603	-5.31394	-2.40978	0.0243745	1	Gm28730
ENSMUSG00000085838	-5.01293	-2.32565	0.0133808	1	Chn1os1
ENSMUSG00000022579	-5.08691	-2.34679	0.0215158	1	Gpihbp1
ENSMUSG00000037358	-5.45897	-2.44863	0.0394588	1	4930578C19Rik
ENSMUSG00000034227	-5.43496	-2.44227	0.0423842	1	Foxj1
ENSMUSG00000086881	-5.01393	-2.32594	0.0255618	1	Gm13594
ENSMUSG00000032649	-5.17857	-2.37255	0.0346296	1	Colgalt2
ENSMUSG00000005373	-4.65668	-2.2193	0.0130018	1	Mlxipl
ENSMUSG00000106019	-5.01728	-2.32691	0.0303887	1	Gm43672
ENSMUSG00000024935	-5.41509	-2.43698	0.0499065	1	Slc1a1
ENSMUSG00000017417	-5.08527	-2.34632	0.0498995	1	Plxdc1
ENSMUSG00000067545	-4.46338	-2.15814	0.0378016	1	Olfr1419
ENSMUSG00000085891	-4.48109	-2.16385	0.0400185	1	Gm14634
ENSMUSG00000089281	-4.08641	-2.03083	0.0228773	1	Scarna6
ENSMUSG00000048078	-4.20751	-2.07297	0.0348132	1	Tenm4
ENSMUSG00000044556	-3.93558	-1.97658	0.0219479	1	Tex38
ENSMUSG00000107658	-3.94815	-1.98118	0.0352242	1	Gm44958
ENSMUSG00000114069	-3.91142	-1.96769	0.0321857	1	AC165273.4
ENSMUSG00000084644	-3.97319	-1.9903	0.0370962	1	Gm24379
ENSMUSG00000086468	-3.69482	-1.8855	0.0282014	1	Etaa1os
ENSMUSG00000111713	-3.69961	-1.88737	0.0370831	1	AL603745.2
ENSMUSG00000097602	-3.69197	-1.88439	0.0438011	1	4930519P11Rik
ENSMUSG00000104623	-3.77461	-1.91633	0.0495841	1	Gm6394
ENSMUSG00000086851	-3.02276	-1.59587	0.0158775	1	A430108G06Rik
ENSMUSG00000112925	-3.00252	-1.58618	0.0265014	1	AC153382.2
ENSMUSG00000049690	-2.79023	-1.48038	0.0406685	1	Nckap5
ENSMUSG00000020902	-2.76133	-1.46536	0.0347689	1	Ntn1
ENSMUSG00000027698	-2.53718	-1.34323	0.0004588	1	Nceh1
ENSMUSG00000027695	-2.12754	-1.08918	0.0229027	1	Pld1
ENSMUSG00000027615	-2.14899	-1.10366	0.0469969	1	Hps3
ENSMUSG00000019528	-2.02904	-1.0208	0.044853	1	Gyg
ENSMUSG00000027630	-1.95535	-0.96743	0.0374438	1	Tbl1xr1

## Sheet: ALL genes Prog-Tg vs WT
Supplementary Table 1. Lists differentially expressed mRNAs in Prog-Tg/WT, LA-Tg/WT and Prog-Tg/LA-Tg endothelial cells (associated with Figure 1A, 1B).
Feature identifier	Mean expression level for the specified group	Mean expression level for the specified group	Standard deviation (of the expression) for the specified sample group	Standard deviation (of the expression) for the specified sample group	Expression ratio (fold change) between compared sample groups	Expression ratio (fold change) between the compared sample groups on the 2-logarithmic scale	T-test p value for the comparison between the sample groups	FDR adjusted p value for the comparison between the sample groups	Average ranking value based on both p value and fold change; value 1 is the strongest DE feature
ID	mean_Pr	mean_WT	sd_Pr	sd_WT	FC	logFC	P.Value	adj.P.Val	avgRank	Description	EntrezID	EntrezIDs	MGI_symbol
ENSMUSG00000103135	46.5855	2.15637	40.2978	0.694891	22.2942	4.47859	0.00402351	0.999997	1	predicted gene, 37979	NA		Gm37979
ENSMUSG00000044162	0.241146	0	0.285702	0	27.8081	4.79743	0.0105097	0.999997	2	TNFAIP3 interacting protein 3	414084	414084	Tnip3
ENSMUSG00000021613	1.11979	15.3319	1.61703	15.2942	-26.1197	-4.70707	0.00928538	0.999997	3	hyaluronan and proteoglycan link protein 1	12950	12950	Hapln1
ENSMUSG00000085925	0.0114725	0.260808	0.019871	0.134717	-18.149	-4.18182	0.00989237	0.999997	4	retrotransposon-like 1	353326	353326	Rtl1
ENSMUSG00000055561	0.188962	0	0.0706357	0	12.4088	3.63329	0.00243409	0.999997	5	serine peptidase inhibitor, Kazal type 5	72432	72432	Spink5
ENSMUSG00000031289	1.22861	0.0608137	1.08501	0.105332	20.5664	4.36222	0.0180739	0.999997	6	interleukin 13 receptor, alpha 2	16165	16165	Il13ra2
ENSMUSG00000026343	2.31991	0.124458	2.58813	0.0784531	17.058	4.09238	0.0144033	0.999997	7	G protein-coupled receptor 39	71111	71111	Gpr39
ENSMUSG00000027022	0.293012	0.0207347	0.270885	0.0276363	14.9804	3.905	0.0131625	0.999997	8	xin actin-binding repeat containing 2	241431	241431	Xirp2
ENSMUSG00000061171	0.151999	4.44042	0.263269	5.75886	-71.6813	-6.16352	0.0263967	0.999997	9	solute carrier family 38, member 11	320106	320106	Slc38a11
ENSMUSG00000050397	0.248107	0	0.210346	0	10.9264	3.44974	0.00447118	0.999997	10	forkhead box L2	26927	26927	Foxl2
ENSMUSG00000032496	0.476598	0.0201038	0.303742	0.0348207	13.6102	3.76662	0.013135	0.999997	11	lactotransferrin	17002	17002	Ltf
ENSMUSG00000096938	0.168088	2.50015	0.264854	2.12735	-20.93	-4.3875	0.0246352	0.999997	12	RIKEN cDNA 9530052E02 gene	NA		9530052E02Rik
ENSMUSG00000029695	0.322881	0.0171355	0.0468801	0.0296796	10.7516	3.42648	0.00705917	0.999997	13	aminoadipate-semialdehyde synthase	30956	30956	Aass
ENSMUSG00000096960	0.259445	0	0.0219606	0	9.71007	3.27948	0.00188473	0.999997	14	RIKEN cDNA A230028O05 gene	NA		A230028O05Rik
ENSMUSG00000037086	2.02878	0	1.62965	0	21.4541	4.42318	0.0262195	0.999997	15	proline rich 32	68800	68800	Prr32
ENSMUSG00000021750	0.3285	0	0.284634	0	12.6527	3.66137	0.0167503	0.999997	16	family with sequence similarity 107, member A	268709	268709	Fam107a
ENSMUSG00000020734	0.380521	8.63273	0.501141	10.0346	-25.6898	-4.68312	0.0303511	0.999997	17	glutamate receptor, ionotropic, NMDA2C (epsilon 3)	14813	14813	Grin2c
ENSMUSG00000027919	3.47461	0	2.90917	0	27.7696	4.79543	0.0307198	0.999997	18	late cornified envelope 1G	66195	66195	Lce1g
ENSMUSG00000028716	0.114152	1.6662	0.124042	0.625728	-13.4651	-3.75116	0.020743	0.999997	19	PDZK1 interacting protein 1	67182	67182	Pdzk1ip1
ENSMUSG00000097083	0	0.462834	0	0.377621	-19.5594	-4.28979	0.0293211	0.999997	20	RIKEN cDNA D930019O06	NA		D930019O06Rik
ENSMUSG00000071550	0.407474	0.0522046	0.113082	0.090421	12.0361	3.5893	0.0190138	0.999997	21	cilia and flagella associated protein 44	212517	212517	Cfap44
ENSMUSG00000043773	0.584517	0.0330433	0.311113	0.0572328	9.41369	3.23476	0.00779813	0.999997	22	RIKEN cDNA 1700048O20 gene	NA		1700048O20Rik
ENSMUSG00000037977	0.355152	0.0138416	0.146241	0.0239743	9.49709	3.24749	0.00822992	0.999997	23	RIKEN cDNA 6430571L13 gene	235599	235599	6430571L13Rik
ENSMUSG00000026166	2.98787	0.190634	1.9743	0.216155	15.2613	3.93181	0.0269854	0.999997	24	chemokine (C-C motif) ligand 20	20297	20297	Ccl20
ENSMUSG00000044313	0.277814	0.0192127	0.0406221	0.0332774	9.16872	3.19672	0.00764191	0.999997	25	mab-21-like 3 (C. elegans)	242125	242125	Mab21l3
ENSMUSG00000026678	1.32008	0.120485	0.81089	0.0706436	9.64447	3.2697	0.0122792	0.999997	26	regulator of G-protein signaling 5	19737	19737	Rgs5
ENSMUSG00000030187	1.74934	0.184479	0.54785	0.0498094	8.85752	3.1469	0.00388764	0.999997	27	killer cell lectin-like receptor, subfamily A, member 2	16633	16633	Klra2
ENSMUSG00000108255	0.0631878	0.812722	0.0550221	0.866603	-11.614	-3.5378	0.0231965	0.999997	28	predicted gene 16499	NA		Gm16499
ENSMUSG00000021728	1.13537	0.189704	0.227569	0.241652	8.6741	3.11671	0.00855422	0.999997	29	embigin	13723	13723	Emb
ENSMUSG00000059412	1.06691	11.5347	1.32732	7.44092	-19.1215	-4.25712	0.0339493	0.999997	30	FXYD domain-containing ion transport regulator 2	11936	11936	Fxyd2
ENSMUSG00000033740	0.0426832	0.966478	0.0526808	1.18855	-14.9698	-3.90398	0.0311205	0.999997	31	suppression of tumorigenicity 18	240690	240690	St18
ENSMUSG00000050395	1.45322	0.227947	1.81705	0.394815	18.9152	4.24147	0.0338599	0.999997	32	tumor necrosis factor (ligand) superfamily, member 15	326623	326623	Tnfsf15
ENSMUSG00000094686	0.167684	11.2488	0.290437	17.0331	-30.1051	-4.91194	0.0385354	0.999997	33	chemokine (C-C motif) ligand 21A (serine)	18829	18829/100504362	Ccl21a
ENSMUSG00000021763	5.47619	24.5143	7.23407	14.9947	-8.51435	-3.0899	0.00839322	0.999997	34	cDNA sequence BC067074	NA		BC067074
ENSMUSG00000012350	0.293385	0.0995093	0.156759	0.172355	9.41063	3.23429	0.0189447	0.999997	35	ets homologous factor	13661	13661	Ehf
ENSMUSG00000047746	0.11539	0	0.0704467	0	9.10269	3.18629	0.0165146	0.999997	36	F-box protein 40	207215	207215	Fbxo40
ENSMUSG00000043496	1.77062	20.7188	2.17695	21.6941	-14.91	-3.89821	0.0320939	0.999997	37	TLR4 interactor with leucine-rich repeats	66873	66873	Tril
ENSMUSG00000084984	0.976761	0.0732184	0.561923	0.126818	8.17192	3.03068	0.00394834	0.999997	38	fatty acyl CoA reductase 1, opposite strand	NA		Far1os
ENSMUSG00000045201	3.66504	0.111238	2.97612	0.113453	26.4548	4.72546	0.039724	0.999997	39	leucine rich repeat containing 3B	218763	218763	Lrrc3b
ENSMUSG00000056054	5.65336	0.831952	4.94142	0.907022	9.35591	3.22588	0.0209764	0.999997	40	S100 calcium binding protein A8 (calgranulin A)	20201	20201	S100a8
ENSMUSG00000086531	1.12789	0	0.939126	0	8.15122	3.02702	0.00611876	0.999997	41	predicted gene 11351	NA		Gm11351
ENSMUSG00000043333	4.25084	0.194959	3.49158	0.124736	17.4556	4.12561	0.0349133	0.999997	42	rhomboid, veinlet-like 2 (Drosophila)	230726	230726	Rhbdl2
ENSMUSG00000022123	0.709786	0	0.991076	0	19.0329	4.25042	0.0382446	0.999997	43	sciellin	64929	64929	Scel
ENSMUSG00000028528	0.206419	0.0185589	0.0508243	0.0176836	7.75295	2.95475	0.00532089	0.999997	44	DnaJ heat shock protein family (Hsp40) member C6	72685	72685	Dnajc6
ENSMUSG00000096549	1.94615	11.8133	3.14682	10.0039	-21.2854	-4.41179	0.0424841	0.999997	45	prickle planar cell polarity protein 4	381104	381104	Prickle4
ENSMUSG00000027261	0.434922	0.0286367	0.308736	0.0496003	8.70858	3.12244	0.0232008	0.999997	46	hydroxyacid oxidase 1, liver	15112	15112	Hao1
ENSMUSG00000029378	0.809421	0.107665	0.520425	0.186481	8.26745	3.04744	0.019094	0.999997	47	amphiregulin	11839	11839	Areg
ENSMUSG00000050105	2.25102	24.2813	1.91639	24.4436	-9.62815	-3.26726	0.0297933	0.999997	48	glycine/arginine rich protein 1	72690	72690	Grrp1
ENSMUSG00000040694	0.151015	4.36264	0.186387	5.72833	-13.2242	-3.72511	0.0373037	0.999997	49	apolipoprotein B mRNA editing enzyme, catalytic polypeptide 2	11811	11811	Apobec2
ENSMUSG00000023987	0.0525522	2.3881	0.0910231	2.35963	-25.3129	-4.6618	0.047398	0.999997	50	progastricsin (pepsinogen C)	109820	109820	Pgc
ENSMUSG00000024905	0.265286	0.0206067	0.041168	0.0356919	7.19522	2.84704	0.00482319	0.999997	51	metallothionein-like 5, testis-specific (tesmin)	17771	17771	Mtl5
ENSMUSG00000061524	0.805507	4.23269	0.600914	2.78303	-7.7564	-2.95539	0.0140791	0.999997	52	zinc finger protein of the cerebellum 2	22772	22772	Zic2
ENSMUSG00000090216	1.34525	0	0.901957	0	8.20307	3.03616	0.0194837	0.999997	53	predicted gene 16549	NA		Gm16549
ENSMUSG00000068859	0.598777	0.0586818	0.333634	0.0322466	7.63278	2.93221	0.0123308	0.999997	54	trans-acting transcription factor 9	381373	381373	Sp9
ENSMUSG00000058427	6.50569	1.15804	2.23586	1.03998	12.8435	3.68297	0.0386007	0.999997	55	chemokine (C-X-C motif) ligand 2	20310	20310	Cxcl2
ENSMUSG00000017868	0.313462	0.0203277	0.151073	0.0352085	7.80656	2.96469	0.0175081	0.999997	56	serum/glucocorticoid regulated kinase 2	27219	27219	Sgk2
ENSMUSG00000097981	1.2906	0.160425	0.260777	0.277864	6.94913	2.79683	0.00976419	0.999997	57	predicted gene 7583	NA		Gm7583
ENSMUSG00000087100	0.0420919	2.71435	0.0729054	2.96835	-8.9434	-3.16082	0.0320589	0.999997	58	predicted gene 14641	NA		Gm14641
ENSMUSG00000030468	0.244801	0.0432946	0.133144	0.0749885	8.33823	3.05974	0.0303568	0.999997	59	sialic acid binding Ig-like lectin G	243958	243958	Siglecg
ENSMUSG00000039742	4.82682	0.759016	1.96773	0.343199	6.83055	2.772	0.0105885	0.999997	60	family with sequence similarity 71, member F1	330277	330277	Fam71f1
ENSMUSG00000050663	0.0883704	0.00859987	0.0645088	0.0148954	7.06732	2.82116	0.0132166	0.999997	61	TRH-degrading enzyme	237553	237553	Trhde
ENSMUSG00000019312	0.0763383	1.2719	0.104232	1.24079	-13.9173	-3.79881	0.046962	0.999997	62	growth factor receptor bound protein 7	14786	14786	Grb7
ENSMUSG00000028072	0.169109	0.539177	0.292906	0.269769	-12.2305	-3.61241	0.0448857	0.999997	63	neurotrophic tyrosine kinase, receptor, type 1	18211	18211	Ntrk1
ENSMUSG00000072875	0.0961172	1.58693	0.080729	2.1838	-9.09604	-3.18524	0.0343505	0.999997	64	G protein-coupled receptor 27	14761	14761	Gpr27
ENSMUSG00000027863	0.0837937	0.410966	0.145135	0.0701487	-8.08459	-3.01517	0.028906	0.999997	65	CD2 antigen	12481	12481	Cd2
ENSMUSG00000008658	0.224223	0.0157568	0.0455925	0.0272915	8.9852	3.16755	0.0347952	0.999997	66	RNA binding protein, fox-1 homolog (C. elegans) 1	268859	268859	Rbfox1
ENSMUSG00000027599	466.794	50.3392	402.536	8.02175	6.48205	2.69645	0.00714182	0.999997	67	armadillo repeat containing 1	74252	74252	Armc1
ENSMUSG00000083495	0.524766	2.39392	0.908921	1.59454	-8.96538	-3.16436	0.034981	0.999997	68	predicted gene 13877	NA		Gm13877
ENSMUSG00000066113	1.38048	9.0543	2.04147	6.57587	-15.8477	-3.9862	0.0523906	0.999997	69	ADAMTS-like 1	77739	77739	Adamtsl1
ENSMUSG00000106073	2.82385	0.341835	2.55812	0.565921	21.9386	4.4554	0.0553029	0.999997	70	predicted gene 42892	NA		Gm42892
ENSMUSG00000074491	0	0.980785	0	1.30372	-14.2845	-3.83638	0.0528563	0.999997	71	C-type lectin domain family 4, member g	75863	75863	Clec4g
ENSMUSG00000107966	0.0966637	0.2959	0.167426	0.22491	-8.38413	-3.06766	0.0363146	0.999997	72	predicted gene, 44001	NA		Gm44001
ENSMUSG00000025701	3.76734	0.255343	3.2126	0.155142	12.2565	3.61547	0.0510477	0.999997	73	arachidonate 5-lipoxygenase	11689	11689	Alox5
ENSMUSG00000105048	0.0225021	0.435623	0.0389749	0.125329	-6.44795	-2.68884	0.0115872	0.999997	74	predicted gene 42966	NA		Gm42966
ENSMUSG00000090602	1.27622	0.23958	0.134772	0.24435	6.39455	2.67684	0.0115771	0.999997	75	predicted gene 5611	NA		Gm5611
ENSMUSG00000020963	0.212376	0.028463	0.0612151	0.0334293	6.87862	2.78212	0.0228164	0.999997	76	thyroid stimulating hormone receptor	22095	22095	Tshr
ENSMUSG00000033174	14.8539	111	14.9239	50.6844	-9.91698	-3.3099	0.0468818	0.999997	77	monoglyceride lipase	23945	23945	Mgll
ENSMUSG00000104632	0.0748104	0.784814	0.0310139	0.373439	-7.29288	-2.86649	0.0296526	0.999997	78	predicted gene 42909	NA		Gm42909
ENSMUSG00000030093	0.899875	8.70129	0.71806	6.19084	-7.6642	-2.93813	0.0322161	0.999997	79	wingless-type MMTV integration site family, member 7A	22421	22421	Wnt7a
ENSMUSG00000029134	0.182937	0.0244199	0.080209	0.00995453	6.2879	2.65258	0.0123316	0.999997	80	phospholipase B1	665270	665270	Plb1
ENSMUSG00000031497	0.197625	0.0398195	0.0343867	0.0464768	7.02281	2.81205	0.0302126	0.999997	81	tumor necrosis factor (ligand) superfamily, member 13b	24099	24099	Tnfsf13b
ENSMUSG00000050069	3.25891	0.937142	1.74093	1.31837	17.8247	4.15581	0.0593345	0.999997	82	gremlin 2, DAN family BMP antagonist	23893	23893	Grem2
ENSMUSG00000079138	0.672763	0.0384973	0.532202	0.0666793	6.5094	2.70252	0.0218122	0.999997	83	predicted pseudogene 8818	NA		Gm8818
ENSMUSG00000002565	0.780543	0.109047	0.906128	0.188875	8.31539	3.05578	0.0436326	0.999997	84	scinderin	20259	20259	Scin
ENSMUSG00000106746	0.638256	0	0.381763	0	8.20664	3.03679	0.0413295	0.999997	85	RIKEN cDNA 2900064F13 gene	NA		2900064F13Rik
ENSMUSG00000085766	0.286044	0.0812154	0.103035	0.140669	6.86278	2.77879	0.0304684	0.999997	86	RIKEN cDNA 2810430I11 gene	NA		2810430I11Rik
ENSMUSG00000032946	2.38092	15.1102	2.18504	10.326	-7.43252	-2.89385	0.0356621	0.999997	87	RAS, guanyl releasing protein 2	19395	19395	Rasgrp2
ENSMUSG00000043458	0.0488663	0.452902	0.0689911	0.25477	-7.80277	-2.96399	0.0406145	0.999997	88	protocadherin beta 12	93883	93883	Pcdhb12
ENSMUSG00000048349	0.0570115	0.44485	0.0987469	0.214433	-6.55163	-2.71185	0.0271116	0.999997	89	POU domain, class 4, transcription factor 1	18996	18996	Pou4f1
ENSMUSG00000032719	0.262409	3.84938	0.394991	5.28633	-26.8048	-4.74442	0.0651701	0.999997	90	somatomedin B and thrombospondin, type 1 domain containing	226866	226866	Sbspon
ENSMUSG00000073805	0.332031	0.0504098	0.163013	0.0177906	5.85689	2.55013	0.00755186	0.999997	91	family with sequence similarity 196, member A	627214	627214	Fam196a
ENSMUSG00000026327	4.21917	19.8686	5.10214	10.1748	-7.61184	-2.92824	0.0386552	0.999997	92	serine (or cysteine) peptidase inhibitor, clade B (ovalbumin), member 11	66957	66957	Serpinb11
ENSMUSG00000006490	1.26959	0	1.84829	0	9.84382	3.29922	0.0548444	0.999997	93	prolactin family8, subfamily a, member 9	67310	67310	Prl8a9
ENSMUSG00000045104	5.70659	0.477189	3.49863	0.419927	6.64743	2.7328	0.0327991	0.999997	94	predicted gene 5514	NA		Gm5514
ENSMUSG00000015354	2.2796	0.392544	1.7446	0.175801	6.37071	2.67146	0.028679	0.999997	95	procollagen C-endopeptidase enhancer 2	76477	76477	Pcolce2
ENSMUSG00000037661	2.66035	8.77466	3.88766	4.98119	-8.28447	-3.05041	0.0501199	0.999997	96	G protein-coupled receptor 160	71862	71862	Gpr160
ENSMUSG00000114053	1.81733	0.0772943	1.6172	0.070278	17.5095	4.13007	0.0656765	0.999997	97		NA		AC133498.1
ENSMUSG00000018865	11.6429	2.37432	10.0927	2.84782	10.0891	3.33472	0.0581056	0.999997	98	sulfotransferase family 4A, member 1	29859	29859	Sult4a1
ENSMUSG00000042717	0.105625	0	0.132314	0	7.48309	2.90363	0.0443456	0.999997	99	protein phosphatase 1, regulatory (inhibitor) subunit 3A	140491	140491	Ppp1r3a
ENSMUSG00000035775	11.4582	2.72266	6.17287	2.85947	7.69894	2.94466	0.0460881	0.999997	100	keratin 20	66809	66809	Krt20
ENSMUSG00000022148	0.249262	0.0612685	0.0338332	0.0867147	5.85266	2.54909	0.0169402	0.999997	101	FYN binding protein	23880	23880	Fyb
ENSMUSG00000086898	0.893637	0.174705	0.442562	0.302598	6.11285	2.61185	0.0250121	0.999997	102	inositol 1,4,5-triphosphate receptor 3, opposite strand	NA		Itpr3os
ENSMUSG00000031965	2.0847	0.265575	1.51468	0.209223	10.3203	3.36742	0.0605611	0.999997	103	T-box 20	57246	57246	Tbx20
ENSMUSG00000027399	0.727362	0.0612564	0.723919	0.106099	6.29727	2.65473	0.0303781	0.999997	104	interleukin 1 alpha	16175	16175	Il1a
ENSMUSG00000047197	1.46255	67.2815	2.35827	100.453	-49.725	-5.6359	0.0714046	0.999997	105	gap junction protein, delta 3	353155	353155	Gjd3
ENSMUSG00000067455	0	1.07299	0	1.14684	-8.39381	-3.06933	0.0541978	0.999997	106	histone cluster 1, H4j	319159	319159	Hist1h4j
ENSMUSG00000091712	0.231362	0	0.123382	0	7.21167	2.85033	0.0450074	0.999997	107	SEC14-like lipid binding 5	665119	665119	Sec14l5
ENSMUSG00000040552	1.08252	0.191813	1.12441	0.222002	8.77902	3.13406	0.0555415	0.999997	108	complement component 3a receptor 1	12267	12267	C3ar1
ENSMUSG00000022805	0.404187	0.0563927	0.157551	0.020494	5.55573	2.47398	0.0122579	0.999997	109	MYCBP-associated, testis expressed 1	320214	320214	Maats1
ENSMUSG00000029380	67.0443	14.4916	52.3786	14.1903	7.44896	2.89704	0.0482412	0.999997	110	chemokine (C-X-C motif) ligand 1	14825	14825	Cxcl1
ENSMUSG00000031129	5.37721	14.4521	6.63203	2.94587	-5.73731	-2.52038	0.0200956	0.999997	111	solute carrier family 9 (sodium/hydrogen exchanger), member 9	331004	331004	Slc9a9
ENSMUSG00000047793	10.2862	69.721	8.55467	68.5935	-6.79648	-2.76479	0.044134	0.999997	112	sushi, nidogen and EGF-like domains 1	208777	208777	Sned1
ENSMUSG00000070732	0.0855083	0.0100347	0.0226462	0.0173806	5.4725	2.4522	0.0112388	0.999997	113	RNA binding motif protein 44	329207	329207	Rbm44
ENSMUSG00000087659	5.16665	1.01854	0.950511	0.50221	5.47236	2.45216	0.0110626	0.999997	114	predicted gene 12606	NA		Gm12606
ENSMUSG00000017417	0.0275391	0.265302	0.0476991	0.12327	-6.03502	-2.59336	0.0304279	0.999997	115	plexin domain containing 1	72324	72324	Plxdc1
ENSMUSG00000018486	0.0807243	0.325958	0.139819	0.23628	-11.4036	-3.51142	0.0657724	0.999997	116	wingless-type MMTV integration site family, member 9B	22412	22412	Wnt9b
ENSMUSG00000041578	0.25401	0	0.295281	0	8.31645	3.05597	0.0566169	0.999997	117	cone-rod homeobox	12951	12951	Crx
ENSMUSG00000032726	0.237507	0.0167595	0.144414	0.0290284	5.4919	2.4573	0.0147219	0.999997	118	bone morphogenetic protein 8a	12163	12163	Bmp8a
ENSMUSG00000102549	0.0520646	0.491384	0.0901785	0.434768	-7.16281	-2.84053	0.0489415	0.999997	119	predicted gene, 38137	NA		Gm38137
ENSMUSG00000047507	0.228826	0.0372219	0.12473	0.0356091	5.52728	2.46657	0.020986	0.999997	120	BAI1-associated protein 3	545192	545192	Baiap3
ENSMUSG00000112023	26.1929	2.65204	17.407	1.52583	9.80494	3.29351	0.0655167	0.999997	121	leukocyte immunoglobulin-like receptor, subfamily B, member 4B	14727	14727	Lilr4b
ENSMUSG00000033837	0.542698	0.0531072	0.187359	0.0919844	6.95315	2.79767	0.0496285	0.999997	122	forkhead box H1	14106	14106	Foxh1
ENSMUSG00000017754	15.3104	2.43988	9.73779	0.848694	6.185	2.62877	0.0351864	0.999997	123	phospholipid transfer protein	18830	18830	Pltp
ENSMUSG00000027457	0.269527	0.044715	0.101649	0.0561089	7.21363	2.85073	0.0525421	0.999997	124	syntaphilin	241727	241727	Snph
ENSMUSG00000092344	2.8879	0.50078	1.30949	0.867376	6.23183	2.63966	0.0385917	0.999997	125	heat shock protein 1 (chaperonin 10), pseudogene 3	NA		Hspe1-ps3
ENSMUSG00000034584	0.0670044	0	0.0379038	0	8.27297	3.04841	0.0599779	0.999997	126	exophilin 5	320051	320051	Exph5
ENSMUSG00000095180	1.97816	0	3.2062	0	9.95956	3.31608	0.0664936	0.999997	127	reproductive homeobox 5	18617	18617	Rhox5
ENSMUSG00000019230	0.326494	0.0462038	0.304396	0.0440247	8.05928	3.01065	0.0570744	0.999997	128	LIM homeobox protein 9	16876	16876	Lhx9
ENSMUSG00000037625	0.503905	6.94286	0.593824	7.77056	-19.977	-4.32027	0.07578	0.999997	129	claudin 11	18417	18417	Cldn11
ENSMUSG00000066705	9.84302	62.8038	5.41522	37.5981	-5.8421	-2.54649	0.0305382	0.999997	130	FXYD domain-containing ion transport regulator 6	59095	59095	Fxyd6
ENSMUSG00000056222	0.273165	3.61781	0.252532	3.01262	-14.402	-3.8482	0.0723261	0.999997	131	sparc/osteonectin, cwcv and kazal-like domains proteoglycan 1	20745	20745	Spock1
ENSMUSG00000029778	0.863667	0.0629523	1.14061	0.0262701	9.6859	3.27589	0.0658277	0.999997	132	adenylate cyclase activating polypeptide 1 receptor 1	11517	11517	Adcyap1r1
ENSMUSG00000030510	0.522652	0.0963719	0.0992451	0.0833747	5.86996	2.55335	0.031472	0.999997	133	ceramide synthase 3	545975	545975	Cers3
ENSMUSG00000075520	4.89715	0.485221	3.83691	0.409801	10.8889	3.44479	0.0684296	0.999997	134	MAM and LDL receptor class A domain containing 1	102635496	102635496	Malrd1
ENSMUSG00000090637	0.0700696	0.287187	0.121364	0.185664	-6.27155	-2.64882	0.0407905	0.999997	135	predicted gene 6189	NA		Gm6189
ENSMUSG00000033207	0.646109	0.102708	0.688638	0.130344	9.15248	3.19416	0.0651798	0.999997	136	MAM domain containing 2	71738	71738	Mamdc2
ENSMUSG00000039543	0.136785	0.0151579	0.0870946	0.0262542	5.85686	2.55013	0.0323715	0.999997	137	cilia and flagella associated protein 70	76670	76670	Cfap70
ENSMUSG00000045539	2.51476	0	3.3262	0	18.3621	4.19866	0.0773843	0.999997	138	small proline-rich protein 3	20766	20766	Sprr3
ENSMUSG00000030306	2.51144	19.1719	3.54847	17.3556	-13.1804	-3.72032	0.0726076	0.999997	139	transmembrane and tetratricopeptide repeat containing 1	387314	387314	Tmtc1
ENSMUSG00000035187	0.409906	0.0884104	0.329488	0.153131	7.92193	2.98585	0.0594488	0.999997	140	NK6 homeobox 1	18096	18096	Nkx6-1
ENSMUSG00000041731	4.60196	40.0392	6.16394	42.9594	-13.3363	-3.73728	0.0736767	0.999997	141	phosphoglucomutase 5	226041	226041	Pgm5
ENSMUSG00000096870	0.0183763	0.276536	0.0318286	0.200742	-6.1479	-2.62009	0.0423673	0.999997	142	predicted gene, 21816	NA		Gm21816
ENSMUSG00000006342	2.81461	32.5437	2.52845	38.9419	-9.25499	-3.21023	0.0676816	0.999997	143	sushi domain containing 2	71733	71733	Susd2
ENSMUSG00000042367	1.78718	0.456614	1.45806	0.706209	11.1355	3.47709	0.0724794	0.999997	144	gap junction protein, beta 3	14620	14620	Gjb3
ENSMUSG00000002257	7.22534	1.3653	3.4345	0.712504	5.43783	2.44303	0.0241963	0.999997	145	differentially expressed in FDCP 6	23853	23853	Def6
ENSMUSG00000041620	0.635752	0.0278169	0.542091	0.0481803	8.00718	3.00129	0.0618704	0.999997	146	matrix metallopeptidase 1b (interstitial collagenase)	83996	83996	Mmp1b
ENSMUSG00000037989	0.0795492	0.520123	0.0535838	0.194695	-5.12461	-2.35744	0.00829363	0.999997	147	WNK lysine deficient protein kinase 2	75607	75607	Wnk2
ENSMUSG00000090066	0.123146	0.0204163	0.0394471	0.0208228	7.37684	2.883	0.0573877	0.999997	148	RIKEN cDNA 1110002E22 gene	102634333	102634333	1110002E22Rik
ENSMUSG00000086976	2.77683	0.369388	1.3331	0.322591	5.18982	2.37569	0.0120299	0.999997	149	predicted gene 12316	NA		Gm12316
ENSMUSG00000084985	0.903121	2.98344	0.932671	1.61087	-5.69077	-2.50862	0.0332067	0.999997	150	predicted gene 16135	NA		Gm16135
ENSMUSG00000110986	0.0675116	0.496002	0.0648518	0.100108	-5.30469	-2.40727	0.0188929	0.999997	151		NA		AC153970.1
ENSMUSG00000042078	1.37404	0.267281	0.589659	0.281411	5.75242	2.52417	0.0346129	0.999997	152	SV2 related protein	68666	68666	Svop
ENSMUSG00000026778	0.390545	10.2311	0.445392	14.4609	-20.49	-4.35685	0.0820273	0.999997	153	protein kinase C, theta	18761	18761	Prkcq
ENSMUSG00000024935	0.00925068	0.185879	0.0160226	0.156031	-5.89978	-2.56066	0.0397831	0.999997	154	solute carrier family 1 (neuronal/epithelial high affinity glutamate transporter, system Xag), member 1	20510	20510	Slc1a1
ENSMUSG00000107835	0.0542005	0.413667	0.0301409	0.255186	-5.65645	-2.4999	0.0335211	0.999997	155	predicted gene, 43999	NA		Gm43999
ENSMUSG00000047344	15.8822	4.63034	11.7363	4.93218	5.90723	2.56248	0.0410252	0.999997	156	LanC lantibiotic synthetase component C-like 3 (bacterial)	236285	236285	Lancl3
ENSMUSG00000028033	0.312969	0.0588507	0.359544	0.0663933	6.10095	2.60903	0.0451943	0.999997	157	potassium voltage-gated channel, subfamily Q, member 5	226922	226922	Kcnq5
ENSMUSG00000043089	1.11513	0.171716	0.987035	0.218898	6.592	2.72072	0.0539242	0.999997	158	matrix metallopeptidase 1a (interstitial collagenase)	83995	83995	Mmp1a
ENSMUSG00000099241	0.503861	0.0641761	0.20858	0.0675271	7.1228	2.83244	0.0583367	0.999997	159	predicted gene, 18852	NA		Gm18852
ENSMUSG00000027220	2.16128	10.3265	2.98013	7.88254	-9.05271	-3.17835	0.0700459	0.999997	160	synaptotagmin XIII	80976	80976	Syt13
ENSMUSG00000077309	0.322467	6.17573	0.558529	5.02172	-5.50484	-2.4607	0.0328593	0.999997	161	nuclear encoded rRNA 5S 8	NA		n-R5s8
ENSMUSG00000107173	0.0322285	0.481222	0.0558214	0.358544	-5.33658	-2.41591	0.0251298	0.999997	162	predicted gene 43266	NA		Gm43266
ENSMUSG00000037095	10.6389	28.4699	16.746	8.96713	-10.9054	-3.44697	0.0766017	0.999997	163	leucine-rich alpha-2-glycoprotein 1	76905	76905	Lrg1
ENSMUSG00000012428	34.7467	9.2904	21.6323	13.1329	14.0048	3.80785	0.0813476	0.999997	164	STEAP family member 4	117167	117167	Steap4
ENSMUSG00000007122	2.99856	0.684026	1.0551	0.505535	5.32509	2.41281	0.0273993	0.999997	165	calsequestrin 1	12372	12372	Casq1
ENSMUSG00000021390	0.325958	0.0411976	0.151995	0.0385773	5.19844	2.37808	0.0215616	0.999997	166	osteoglycin	18295	18295	Ogn
ENSMUSG00000041293	1.10027	6.47383	1.70321	4.68541	-16.7174	-4.06328	0.0843381	0.999997	167	adhesion G protein-coupled receptor F1	77596	77596	Adgrf1
ENSMUSG00000106603	0.324901	1.17209	0.378448	0.57178	-6.01806	-2.5893	0.0482939	0.999997	168	predicted gene 43509	NA		Gm43509
ENSMUSG00000027544	0.251009	1.54051	0.196774	1.29311	-5.77585	-2.53003	0.0437566	0.999997	169	nuclear factor of activated T cells, cytoplasmic, calcineurin dependent 2	18019	18019	Nfatc2
ENSMUSG00000074796	4.44292	1.15284	2.27039	0.893855	5.1291	2.35871	0.0214572	0.999997	170	solute carrier family 4, sodium bicarbonate transporter-like, member 11	269356	269356	Slc4a11
ENSMUSG00000032584	0.272253	0.0684718	0.234306	0.0868961	6.38257	2.67414	0.0548211	0.999997	171	macrophage stimulating 1 receptor (c-met-related tyrosine kinase)	19882	19882	Mst1r
ENSMUSG00000034634	0.835969	0.186446	0.0508168	0.322934	5.17973	2.37288	0.0242754	0.999997	172	lymphocyte antigen 6 complex, locus D	17068	17068	Ly6d
ENSMUSG00000042256	0.363082	0.0513924	0.234715	0.0341143	6.70915	2.74613	0.0601721	0.999997	173	patched domain containing 4	627626	627626	Ptchd4
ENSMUSG00000029377	36.0248	6.44756	20.3753	5.42126	6.74343	2.75348	0.0605752	0.999997	174	epiregulin	13874	13874	Ereg
ENSMUSG00000106696	0.256916	0.0275131	0.166545	0.0476541	5.2052	2.37995	0.0255073	0.999997	175	predicted gene 42729	NA		Gm42729
ENSMUSG00000034813	0.157748	0.0249918	0.0952097	0.043287	5.92643	2.56716	0.0486626	0.999997	176	glutamate receptor interacting protein 1	74053	74053	Grip1
ENSMUSG00000055471	0.0720176	3.65664	0.0774388	5.8796	-17.3491	-4.11679	0.0854016	0.999997	177	anaplastic lymphoma kinase	11682	11682	Alk
ENSMUSG00000033981	0.40116	1.84641	0.286014	1.39707	-5.09512	-2.34912	0.0221654	0.999997	178	glutamate receptor, ionotropic, AMPA2 (alpha 2)	14800	14800	Gria2
ENSMUSG00000040432	1.71153	0.21626	1.26906	0.259619	7.08187	2.82413	0.0634335	0.999997	179	leukotriene B4 receptor 2	57260	57260	Ltb4r2
ENSMUSG00000022947	8.36166	1.45797	4.16704	0.536548	5.82246	2.54163	0.0470515	0.999997	180	carbonyl reductase 3	109857	109857	Cbr3
ENSMUSG00000021469	4.51322	1.52551	1.88579	1.64184	6.47858	2.69568	0.058264	0.999997	181	msh homeobox 2	17702	17702	Msx2
ENSMUSG00000074577	3.93703	13.8364	5.62319	5.12397	-9.34125	-3.22362	0.0783827	0.999997	182	family with sequence similarity 65, member C	69553	69553	Fam65c
ENSMUSG00000034227	0.22532	2.01373	0.18761	2.01369	-5.504	-2.46048	0.0407227	0.999997	183	forkhead box J1	15223	15223	Foxj1
ENSMUSG00000031877	13.2538	3.07714	3.75753	2.02935	4.94312	2.30542	0.0179025	0.999997	184	carboxylesterase 2G	72361	72361	Ces2g
ENSMUSG00000037358	3.02091	16.3405	2.14934	18.0998	-5.46281	-2.44964	0.0388616	0.999997	185	RIKEN cDNA 4930578C19 gene	75905	75905	4930578C19Rik
ENSMUSG00000098132	3.88731	16.1969	5.17722	7.84234	-8.67653	-3.11712	0.0756469	0.999997	186	Ras association (RalGDS/AF-6) domain family (N-terminal) member 10	78748	78748	Rassf10
ENSMUSG00000056498	8.51805	1.98386	3.78758	1.55782	6.16441	2.62396	0.05441	0.999997	187	transmembrane protein 154	320782	320782	Tmem154
ENSMUSG00000100334	0.85171	0.158575	0.413233	0.0787948	5.5319	2.46777	0.0447452	0.999997	188	RIKEN cDNA C230024C17 gene	NA		C230024C17Rik
ENSMUSG00000049100	0.844185	2.71868	1.10273	1.15676	-6.76506	-2.7581	0.0637519	0.999997	189	protocadherin 10	18526	18526	Pcdh10
ENSMUSG00000029603	2.33132	79.4931	2.71396	103.944	-36.0261	-5.17097	0.0910469	0.999997	190	deltex 1, E3 ubiquitin ligase	14357	14357	Dtx1
ENSMUSG00000001622	0.191904	0.0167047	0.0771024	0.0289334	6.72123	2.74872	0.0641821	0.999997	191	casein kappa	12994	12994	Csn3
ENSMUSG00000105826	1.11988	0.164846	0.908805	0.197119	6.89011	2.78453	0.066216	0.999997	192	predicted gene 43819	NA		Gm43819
ENSMUSG00000054385	0	0.221856	0	0.305111	-7.0251	-2.81252	0.0674165	0.999997	193	carcinoembryonic antigen-related cell adhesion molecule 2	26367	26367	Ceacam2
ENSMUSG00000045287	0.149456	0.951894	0.0465269	0.57637	-5.25049	-2.39245	0.0340583	0.999997	194	reticulon 4 receptor-like 1	237847	237847	Rtn4rl1
ENSMUSG00000067577	0.0843854	1.0443	0.0923241	0.888742	-7.85822	-2.9742	0.073984	0.999997	195	RIKEN cDNA A430093F15 gene	NA		A430093F15Rik
ENSMUSG00000084094	0.112808	0.0137063	0.0287711	0.0237399	5.23943	2.38941	0.0346323	0.999997	196	predicted gene 13961	NA		Gm13961
ENSMUSG00000029120	0.162128	0.00905769	0.0419655	0.0156884	5.99112	2.58282	0.0556652	0.999997	197	protein phosphatase 2, regulatory subunit B, gamma	269643	269643	Ppp2r2c
ENSMUSG00000039252	0.43356	0.074281	0.27342	0.0323608	5.42936	2.44078	0.0427102	0.999997	198	leucine-rich repeat LGI family, member 2	246316	246316	Lgi2
ENSMUSG00000073753	0.874861	0.116165	0.402756	0.111132	5.81196	2.53903	0.0533036	0.999997	199	predicted gene 10571	NA		Gm10571
ENSMUSG00000082082	4.83862	0.772193	2.96789	0.617378	6.88201	2.78283	0.0683495	0.999997	200	predicted gene 13230	NA		Gm13230
ENSMUSG00000033491	20.2943	54.7555	33.5459	42.4501	-15.8781	-3.98897	0.0905928	0.999997	201	protease, serine 35	244954	244954	Prss35
ENSMUSG00000064109	2.09569	0.415433	0.75809	0.362803	4.94332	2.30548	0.0279597	0.999997	202	hematopoietic cell signal transducer	23900	23900	Hcst
ENSMUSG00000000244	0.339381	7.34329	0.435708	10.3638	-17.6137	-4.13863	0.0927633	0.999997	203	tetraspanin 32	27027	27027	Tspan32
ENSMUSG00000097754	1.13008	0.315709	1.2683	0.452946	6.9931	2.80593	0.0703402	0.999997	204	prostaglandin-endoperoxide synthase 2, opposite strand 2	NA		Ptgs2os2
ENSMUSG00000085033	1.92308	0.698821	0.841771	1.21039	5.43267	2.44166	0.0453885	0.999997	205	predicted gene 11646	NA		Gm11646
ENSMUSG00000047394	1.37695	6.46305	1.02526	3.38298	-4.85171	-2.27849	0.0254138	0.999997	206	outer dense fiber of sperm tails 3B	70113	70113	Odf3b
ENSMUSG00000022311	1.40838	0.0804471	1.2894	0.133184	36.36	5.18428	0.0964294	0.999997	207	CUB and Sushi multiple domains 3	239420	239420	Csmd3
ENSMUSG00000030074	0.736182	0.173427	0.58888	0.0932913	4.98586	2.31784	0.0319198	0.999997	208	glucoside xylosyltransferase 2	232313	232313	Gxylt2
ENSMUSG00000067085	3.43543	0.670469	1.59798	0.581392	5.02765	2.32988	0.034548	0.999997	209	predicted gene 10197	NA		Gm10197
ENSMUSG00000104990	0.317052	1.4173	0.191116	0.462594	-4.50668	-2.17207	0.0057253	0.999997	210	predicted gene 43504	NA		Gm43504
ENSMUSG00000024747	0.730984	0.0195095	0.827872	0.0337915	8.98671	3.16779	0.0855512	0.999997	211	aldehyde dehydrogenase family 1, subfamily A7	26358	26358	Aldh1a7
ENSMUSG00000107168	0.235053	0.027146	0.178625	0.0470182	4.92059	2.29883	0.0324446	0.999997	212	predicted gene 42507	NA		Gm42507
ENSMUSG00000063415	1.5172	0.287609	1.16416	0.104132	5.39127	2.43062	0.0492095	0.999997	213	cytochrome P450, family 26, subfamily b, polypeptide 1	232174	232174	Cyp26b1
ENSMUSG00000035258	0.267739	2.46248	0.289081	2.63779	-7.67639	-2.94043	0.0799117	0.999997	214	ABI gene family, member 3 (NESH) binding protein	320712	320712	Abi3bp
ENSMUSG00000107350	6.05583	0.608776	3.53579	0.811411	10.664	3.41467	0.0897557	0.999997	215	predicted gene 42532	NA		Gm42532
ENSMUSG00000043263	2.23333	0.866507	0.898021	0.809096	6.14638	2.61974	0.0649678	0.999997	216	interferon activated gene 209	236312	236312	Ifi209
ENSMUSG00000106157	0.521925	0.035881	0.503373	0.0621477	6.455	2.69042	0.0690292	0.999997	217	RIKEN cDNA 4930555A03 gene	NA		4930555A03Rik
ENSMUSG00000108010	1.26949	2.78323	1.98381	0.686876	-5.92099	-2.56584	0.0623149	0.999997	218	predicted gene, 44246	NA		Gm44246
ENSMUSG00000032289	1.20649	7.5508	0.400942	7.30644	-4.71317	-2.2367	0.0282514	0.999997	219	thrombospondin, type I, domain containing 4	207596	207596	Thsd4
ENSMUSG00000074635	0.125307	1.17186	0.109598	0.47575	-5.74667	-2.52273	0.059919	0.999997	220	RIKEN cDNA 3110070M22 gene	NA		3110070M22Rik
ENSMUSG00000019232	0.204354	0.734419	0.327754	0.591096	-13.4288	-3.74726	0.0948509	0.999997	221	ethanolamine phosphate phospholyase	71760	71760	Etnppl
ENSMUSG00000071112	35.2023	130.104	50.3337	15.8746	-10.2299	-3.35472	0.0909365	0.999997	222	spexin hormone	319552	319552	Spx
ENSMUSG00000034855	0.877831	0.245577	0.0988157	0.348411	5.34979	2.41948	0.0519264	0.999997	223	chemokine (C-X-C motif) ligand 10	15945	15945	Cxcl10
ENSMUSG00000111131	0.0724055	0.427995	0.0671134	0.0520691	-4.52294	-2.17726	0.0179054	0.999997	224		NA		AC115297.1
ENSMUSG00000111197	0.590516	2.12381	0.749589	1.13314	-4.74724	-2.24709	0.0331297	0.999997	225		NA		AC055818.1
ENSMUSG00000086681	1.32679	0.161986	0.876104	0.154347	5.40131	2.43331	0.0545883	0.999997	226	predicted gene 16178	NA		Gm16178
ENSMUSG00000021388	0.00808223	0.4684	0.0139988	0.48476	-6.75567	-2.7561	0.078708	0.999997	227	asporin	66695	66695	Aspn
ENSMUSG00000040164	0.848486	7.92966	0.330325	6.85268	-5.44192	-2.44412	0.0565307	0.999997	228	K+ voltage-gated channel, subfamily S, 1	16538	16538	Kcns1
ENSMUSG00000020080	0.0892117	0.007854	0.0535131	0.0136035	4.56437	2.19042	0.0242908	0.999997	229	hexokinase domain containing 1	216019	216019	Hkdc1
ENSMUSG00000103805	0.0606995	0.422307	0.00505642	0.317059	-4.51811	-2.17572	0.0205507	0.999997	230	predicted gene, 37063	NA		Gm37063
ENSMUSG00000045284	0.822994	0.209909	0.40736	0.227701	5.31857	2.41104	0.0542335	0.999997	231	DDB1 and CUL4 associated factor 12-like 1	245404	245404	Dcaf12l1
ENSMUSG00000032561	22.5708	4.71492	13.3857	5.62023	8.96443	3.16421	0.092349	0.999997	232	acid phosphatase, prostate	56318	56318	Acpp
ENSMUSG00000025425	0.039887	0.373336	0.0475056	0.325211	-5.18018	-2.373	0.0527454	0.999997	233	ST8 alpha-N-acetyl-neuraminide alpha-2,8-sialyltransferase 5	225742	225742	St8sia5
ENSMUSG00000006411	0.187192	0.0282202	0.0906568	0.0264254	4.74108	2.24522	0.0376191	0.999997	234	nectin cell adhesion molecule 4	71740	71740	Nectin4
ENSMUSG00000044556	0.361302	2.11388	0.180841	1.04288	-4.37571	-2.12952	0.0140444	0.999997	235	testis expressed 38	75173	75173	Tex38
ENSMUSG00000070280	0.821203	0	1.08371	0	11.9261	3.57605	0.0983937	0.999997	236	solute carrier family 22 (organic cation transporter), member 14	382113	382113	Slc22a14
ENSMUSG00000086578	2.14821	0.478685	0.204777	0.134117	4.46292	2.15799	0.0220712	0.999997	237	predicted gene 13583	NA		Gm13583
ENSMUSG00000032419	2.60412	0.628267	2.71309	0.526415	5.07286	2.3428	0.0512817	0.999997	238	T-box18	76365	76365	Tbx18
ENSMUSG00000020875	0.405497	0.0582639	0.241551	0.0508826	4.70716	2.23486	0.037968	0.999997	239	homeobox B9	15417	15417	Hoxb9
ENSMUSG00000005057	6.79724	2.73177	2.5148	2.90169	5.34082	2.41706	0.0572323	0.999997	240	SH2B adaptor protein 2	23921	23921	Sh2b2
ENSMUSG00000082726	0.462892	1.08307	0.742925	0.293084	-5.29521	-2.40469	0.0563728	0.999997	241	predicted gene 11424	NA		Gm11424
ENSMUSG00000102548	1.3492	0.144287	0.766665	0.125117	8.02498	3.0045	0.0893311	0.999997	242	predicted gene, 16701	NA		Gm16701
ENSMUSG00000030317	0.0312073	0.1344	0.038517	0.0291288	-4.6179	-2.20724	0.0339066	0.999997	243	tissue inhibitor of metalloproteinase 4	110595	110595	Timp4
ENSMUSG00000017639	0.0617152	1.15776	0.0761706	1.66948	-9.93032	-3.31184	0.0972858	0.999997	244	RAB11 family interacting protein 4 (class II)	268451	268451	Rab11fip4
ENSMUSG00000012889	0.159934	0	0.225731	0	6.00379	2.58587	0.0728838	0.999997	245	podocan-like 1	244550	244550	Podnl1
ENSMUSG00000020758	13.2417	129.66	14.267	126.475	-11.4373	-3.51567	0.0996748	0.999997	246	integrin beta 4	192897	192897	Itgb4
ENSMUSG00000074277	7.46427	51.2092	3.76674	44.8382	-5.6261	-2.49214	0.0671031	0.999997	247	pleckstrin homology like domain, family B, member 3	232970	232970	Phldb3
ENSMUSG00000060093	0.918555	0.0747805	0.454134	0.129524	4.80779	2.26537	0.0452226	0.999997	248	histone cluster 1, H4a	326619	326619	Hist1h4a
ENSMUSG00000062342	8.56723	0.913793	12.7072	0.942639	9.25307	3.20993	0.0963097	0.999997	249	serine (or cysteine) peptidase inhibitor, clade B, member 9e	20710	20710	Serpinb9e
ENSMUSG00000025900	0.104391	0	0.110686	0	9.69931	3.27788	0.0981372	0.999997	250	retinitis pigmentosa 1 (human)	19888	19888	Rp1
ENSMUSG00000103572	0.13177	0.426467	0.15384	0.180788	-5.3419	-2.41735	0.0613078	0.999997	251	predicted gene, 37115	NA		Gm37115
ENSMUSG00000085427	0.337374	0.0483104	0.142514	0.046032	5.1239	2.35724	0.0551794	0.999997	252	RIKEN cDNA 6430710C18 gene	NA		6430710C18Rik
ENSMUSG00000101942	0.688162	0.164942	0.371159	0.285687	4.78989	2.25999	0.0454293	0.999997	253	predicted gene, 19582	NA		Gm19582
ENSMUSG00000055313	0.263709	0.0488343	0.158031	0.0131853	4.44887	2.15344	0.0284315	0.999997	254	piggyBac transposable element derived 1	319207	319207	Pgbd1
ENSMUSG00000112148	15.3537	1.02771	14.1858	0.0418576	10.9939	3.45863	0.10128	0.999997	255	leukocyte immunoglobulin-like receptor, subfamily B, member 4A	14728	14728	Lilrb4a
ENSMUSG00000027359	0.097153	0.27824	0.168274	0.302319	-6.8091	-2.76746	0.08559	0.999997	256	solute carrier family 27 (fatty acid transporter), member 2	26458	26458	Slc27a2
ENSMUSG00000112728	0.755864	0	0.658356	0	5.62158	2.49098	0.0689404	0.999997	257		NA		AC123694.2
ENSMUSG00000098116	0.647461	0.0814277	0.0539351	0.141037	4.91182	2.29626	0.051367	0.999997	258	predicted gene 7191	NA		Gm7191
ENSMUSG00000045392	0.101954	0	0.134587	0	5.18302	2.37379	0.0590586	0.999997	259	olfactory receptor 1033	258571	258571	Olfr1033
ENSMUSG00000027202	0.349635	0.0734776	0.198493	0.0615658	4.5651	2.19065	0.0353932	0.999997	260	solute carrier family 12, member 1	20495	20495	Slc12a1
ENSMUSG00000070720	11.6279	50.5722	11.2168	39.0554	-6.47188	-2.69419	0.0843877	0.999997	261	transmembrane protein 200B	623230	623230	Tmem200b
ENSMUSG00000005800	0.406695	0.0166213	0.352872	0.028789	6.19083	2.63013	0.0798782	0.999997	262	matrix metallopeptidase 8	17394	17394	Mmp8
ENSMUSG00000113690	0.163348	1.4651	0.142276	1.04906	-5.04788	-2.33568	0.0556979	0.999997	263		NA		CT030722.2
ENSMUSG00000045319	0.155979	0.0431032	0.122036	0.0578051	5.88002	2.55582	0.075542	0.999997	264	proline and serine rich 2	227545	227545	Proser2
ENSMUSG00000022468	1.56698	0.46867	0.639644	0.516999	5.24752	2.39164	0.0614216	0.999997	265	endonuclease, polyU-specific	19011	19011	Endou
ENSMUSG00000097040	0.301664	0.561734	0.522498	0.273229	-6.20838	-2.63422	0.0812917	0.999997	266	RIKEN cDNA 2610316D01 gene	NA		2610316D01Rik
ENSMUSG00000052485	7.63359	1.57396	3.72936	1.62042	4.68592	2.22833	0.0456434	0.999997	267	transmembrane protein 171	380863	380863	Tmem171
ENSMUSG00000034413	5.96864	14.8844	6.5075	5.00853	-4.29532	-2.10276	0.0246878	0.999997	268	neuralized E3 ubiquitin protein ligase 1B	240055	240055	Neurl1b
ENSMUSG00000038327	1.69619	0.0995178	2.56407	0.0952059	8.61794	3.10734	0.0971083	0.999997	269	serine (or cysteine) peptidase inhibitor, clade B, member 9f	20709	20709	Serpinb9f
ENSMUSG00000031448	0.0708023	0	0.0732085	0	5.32778	2.41353	0.0639535	0.999997	270	ADP-ribosylhydrolase like 1	234072	234072	Adprhl1
ENSMUSG00000050241	0.150433	0.011536	0.11284	0.0199809	5.17005	2.37018	0.0614045	0.999997	271	killer cell lectin-like receptor family E member 1	243655	243655	Klre1
ENSMUSG00000020431	0.317457	6.38646	0.168092	8.59623	-9.98531	-3.31981	0.102563	0.999997	272	adenylate cyclase 1	432530	432530	Adcy1
ENSMUSG00000027797	1.53664	0.444265	1.44622	0.475328	6.59783	2.72199	0.0866912	0.999997	273	doublecortin-like kinase 1	13175	13175	Dclk1
ENSMUSG00000107355	1.06041	0.286321	0.334571	0.21615	4.52014	2.17637	0.0362979	0.999997	274	expressed sequence AI839979	NA		AI839979
ENSMUSG00000039488	0.566935	1.67827	0.774094	0.216117	-7.69095	-2.94316	0.0940546	0.999997	275	contactin 5	244682	244682	Cntn5
ENSMUSG00000053559	12.9479	62.4272	6.37738	35.1288	-4.71455	-2.23712	0.0504459	0.999997	276	small cell adhesion glycoprotein	207818	207818	Smagp
ENSMUSG00000053310	81.257	267.69	133.898	158.573	-20.6096	-4.36524	0.110164	0.999997	277	neurogranin	64011	64011	Nrgn
ENSMUSG00000110234	0.302557	0.0617095	0.139235	0.0822499	4.62133	2.20831	0.0457279	0.999997	278	predicted gene 45799	NA		Gm45799
ENSMUSG00000059187	4.22228	0.729898	3.06048	0.766089	8.02607	3.00469	0.0966309	0.999997	279	family with sequence similarity 19, member A1	320265	320265	Fam19a1
ENSMUSG00000089281	0.602812	3.5701	0.549875	1.21071	-4.19672	-2.06926	0.0210706	0.999997	280	small Cajal body-specific RNA 6	NA		Scarna6
ENSMUSG00000047420	1.68635	16.7501	1.94569	12.8713	-17.3233	-4.11464	0.109211	0.999997	281	family with sequence similarity 180, member A	208164	208164	Fam180a
ENSMUSG00000095550	0.346461	0.0706812	0.0912489	0.0830141	4.70389	2.23385	0.0511089	0.999997	282	predicted gene, 21671	100862359	100862359	Gm21671
ENSMUSG00000079092	0.78552	0.0636312	0.680788	0.110212	5.82278	2.54171	0.079291	0.999997	283	prolactin family 2, subfamily c, member 2	18811	18811	Prl2c2
ENSMUSG00000027208	5.93999	2.11195	2.91956	2.28036	4.53609	2.18145	0.0426607	0.999997	284	fibroblast growth factor 7	14178	14178	Fgf7
ENSMUSG00000105553	0.0502009	0.310847	0.0619593	0.126714	-4.64408	-2.21539	0.0496636	0.999997	285	predicted gene 42514	NA		Gm42514
ENSMUSG00000059606	1.89051	0.268936	2.1712	0.274291	7.00813	2.80903	0.0931534	0.999997	286	ribonuclease, RNase A family, 2B (liver, eosinophil-derived neurotoxin)	54159	54159	Rnase2b
ENSMUSG00000079019	0.590485	2.367	0.728793	0.634656	-5.29546	-2.40475	0.0675894	0.999997	287	insulin-like 3	16336	16336	Insl3
ENSMUSG00000036411	0.145054	0.701351	0.114748	0.277938	-4.11043	-2.03929	0.0165284	0.999997	288	RIKEN cDNA 9530077C05 gene	68283	68283	9530077C05Rik
ENSMUSG00000085731	0.99487	0.290621	0.323267	0.347519	4.48291	2.16444	0.0408251	0.999997	289	predicted gene 16229	NA		Gm16229
ENSMUSG00000032420	0.446161	0.0956979	0.257819	0.0752638	5.54174	2.47034	0.0756494	0.999997	290	5 nucleotidase, ecto	23959	23959	Nt5e
ENSMUSG00000109735	0.0635585	0.676263	0.0756985	0.461635	-6.27602	-2.64985	0.086223	0.999997	291	predicted gene 45667	NA		Gm45667
ENSMUSG00000037185	8.69757	1.54587	6.28074	1.2457	7.51761	2.91027	0.0963484	0.999997	292	keratin 80	74127	74127	Krt80
ENSMUSG00000014329	6.98522	1.95801	2.51137	1.21003	4.43548	2.14909	0.0394107	0.999997	293	BicC family RNA binding protein 1	83675	83675	Bicc1
ENSMUSG00000046318	2.28848	0.610312	1.15572	0.577442	5.76406	2.52709	0.0800855	0.999997	294	collagen and calcium binding EGF domains 1	320924	320924	Ccbe1
ENSMUSG00000079444	0.336832	1.51026	0.478569	1.22445	-7.54842	-2.91618	0.0966276	0.999997	295	predicted gene 21981	NA		Gm21981
ENSMUSG00000107035	1.07197	0.271302	0.366649	0.236604	4.20655	2.07264	0.0280631	0.999997	296	Y box protein 1, pseudogene 2	NA		Ybx1-ps2
ENSMUSG00000028977	0.632013	3.99469	0.523186	4.00184	-5.68685	-2.50763	0.0795577	0.999997	297	castor zinc finger 1	69743	69743	Casz1
ENSMUSG00000030155	20.8745	2.61014	18.2738	4.17906	22.6092	4.49884	0.113715	0.999997	298	C-type lectin domain family 2, member e	232409	232409	Clec2e
ENSMUSG00000107624	0.159044	0.730178	0.130634	0.475699	-6.33454	-2.66324	0.0876452	0.999997	299	predicted gene, 44005	NA		Gm44005
ENSMUSG00000032649	0.517902	3.56774	0.317085	4.0399	-4.58469	-2.19682	0.0500948	0.999997	300	collagen beta(1-O)galactosyltransferase 2	269132	269132	Colgalt2
ENSMUSG00000022309	1.0626	0.940172	1.84048	0.876255	-13.3594	-3.73978	0.110152	0.999997	301	angiopoietin 1	11600	11600	Angpt1
ENSMUSG00000087633	0.16015	1.37739	0.0611128	1.5156	-4.66292	-2.22123	0.0540158	0.999997	302	predicted gene 14455	NA		Gm14455
ENSMUSG00000029641	6.43671	0.743673	8.88635	0.509655	7.52036	2.9108	0.098413	0.999997	303	RAS-like, family 11, member A	68895	68895	Rasl11a
ENSMUSG00000037005	1.18944	0.649594	0.541394	1.02603	6.59951	2.72236	0.093414	0.999997	304	X-prolyl aminopeptidase (aminopeptidase P) 2, membrane-bound	170745	170745	Xpnpep2
ENSMUSG00000109416	0.454396	0.0283451	0.273905	0.0490951	5.13735	2.36102	0.0680006	0.999997	305	predicted gene 44863	NA		Gm44863
ENSMUSG00000025150	1.15927	0.203111	1.34385	0.176126	6.63983	2.73115	0.0940758	0.999997	306	carbonyl reductase 2	12409	12409	Cbr2
ENSMUSG00000069300	1.24222	0.141266	1.37995	0.24468	5.3939	2.43133	0.074777	0.999997	307	histone cluster 1, H2bj	319183	319183	Hist1h2bj
ENSMUSG00000039304	0.725538	2.95194	0.498516	1.9691	-4.60324	-2.20265	0.0525589	0.999997	308	tumor necrosis factor (ligand) superfamily, member 10	22035	22035	Tnfsf10
ENSMUSG00000051669	1.27853	0.11003	1.36733	0.0960908	5.77832	2.53065	0.0841579	0.999997	309	expressed sequence AU021092	239691	239691	AU021092
ENSMUSG00000091587	0.466754	2.37967	0.0570944	0.416926	-4.0867	-2.03094	0.0213484	0.999997	310	predicted gene 17191	NA		Gm17191
ENSMUSG00000028116	0.485458	0	0.45652	0	12.707	3.66756	0.111661	0.999997	311	myozenin 2	59006	59006	Myoz2
ENSMUSG00000079654	0.380946	6.91968	0.23984	9.99909	-7.27703	-2.86335	0.0984436	0.999997	312	proline-rich transmembrane protein 4	101359	101359	Prrt4
ENSMUSG00000097626	0.224312	0.0303369	0.129532	0.052545	4.42815	2.1467	0.0460661	0.999997	313	RIKEN cDNA 4921504A21 gene	NA		4921504A21Rik
ENSMUSG00000050578	26.0693	2.28766	39.8053	1.73356	9.57502	3.25928	0.108201	0.999997	314	matrix metallopeptidase 13	17386	17386	Mmp13
ENSMUSG00000028546	7.70436	1.97159	5.5981	2.41377	6.4657	2.69281	0.0935677	0.999997	315	ELAV (embryonic lethal, abnormal vision, Drosophila)-like 4 (Hu antigen D)	15572	15572	Elavl4
ENSMUSG00000041797	0.194564	0.0236429	0.108197	0.0226185	4.99584	2.32073	0.0673415	0.999997	316	ATP-binding cassette, sub-family A (ABC1), member 9	217262	217262	Abca9
ENSMUSG00000091744	0.771554	0.128761	0.286323	0.120572	4.24504	2.08578	0.0381066	0.999997	317	predicted gene, 17732	NA		Gm17732
ENSMUSG00000032338	0.0330463	0.136392	0.0317731	0.112348	-6.21945	-2.63679	0.0908998	0.999997	318	hyperpolarization-activated, cyclic nucleotide-gated K+ 4	330953	330953	Hcn4
ENSMUSG00000058396	18.8422	45.2974	29.1723	27.5284	-8.23015	-3.04092	0.104513	0.999997	319	G protein-coupled receptor 182	11536	11536	Gpr182
ENSMUSG00000085166	0.964516	0.134666	0.624177	0.126101	4.13654	2.04842	0.0313972	0.999997	320	predicted gene 15522	NA		Gm15522
ENSMUSG00000019851	34.1335	6.8419	20.3571	1.07138	4.54682	2.18486	0.0529194	0.999997	321	PERP, TP53 apoptosis effector	64058	64058	Perp
ENSMUSG00000103940	0.0237523	0.321673	0.0411401	0.175377	-4.57541	-2.1939	0.0549471	0.999997	322	predicted gene, 38227	NA		Gm38227
ENSMUSG00000109908	0.190391	0.0569442	0.125605	0.0986302	4.79043	2.26016	0.0626334	0.999997	323	predicted gene 45535	NA		Gm45535
ENSMUSG00000073486	0.432366	0.0309813	0.362606	0.0536612	4.2375	2.08321	0.0392215	0.999997	324	predicted gene 10518	NA		Gm10518
ENSMUSG00000107706	0.070683	0.33175	0.113444	0.273016	-7.33593	-2.87498	0.102022	0.999997	325	predicted gene, 44022	NA		Gm44022
ENSMUSG00000018916	25.2822	6.53311	21.8945	5.66058	8.53411	3.09324	0.107297	0.999997	326	colony stimulating factor 2 (granulocyte-macrophage)	12981	12981	Csf2
ENSMUSG00000049593	3.55025	0.440791	3.27787	0.529167	5.90773	2.5626	0.0886589	0.999997	327	late cornified envelope 1H	67718	67718	Lce1h
ENSMUSG00000022054	1.25282	0.418292	0.294979	0.327457	4.0849	2.0303	0.0297512	0.999997	328	neurofilament, medium polypeptide	18040	18040	Nefm
ENSMUSG00000047146	0.112621	0.672377	0.124888	0.816438	-6.29427	-2.65404	0.094461	0.999997	329	tet methylcytosine dioxygenase 1	52463	52463	Tet1
ENSMUSG00000031028	3.2144	16.538	0.64037	9.63235	-4.11621	-2.04132	0.0337976	0.999997	330	tubby bipartite transcription factor	22141	22141	Tub
ENSMUSG00000094840	0.434227	6.22836	0.435704	6.76213	-10.9234	-3.44935	0.1141	0.999997	331	mucin 3A, cell surface associated	NA		Muc3a
ENSMUSG00000033644	0.614809	0.156932	0.194362	0.0716359	4.06072	2.02173	0.0307648	0.999997	332	piwi-like RNA-mediated gene silencing 2	57746	57746	Piwil2
ENSMUSG00000039853	1.12342	4.68404	0.971758	1.82915	-5.73913	-2.52083	0.0883727	0.999997	333	tripartite motif-containing 14	74735	74735	Trim14
ENSMUSG00000097313	1.7762	0.565298	1.5297	0.92121	7.38601	2.8848	0.104483	0.999997	334	predicted gene, 26569	NA		Gm26569
ENSMUSG00000047658	0.190415	0.0270162	0.18226	0.0467935	4.68212	2.22716	0.0648415	0.999997	335	galactose-3-O-sulfotransferase 3	545276	545276	Gal3st3
ENSMUSG00000069273	0.772908	0.156474	0.465901	0.271022	4.61359	2.20589	0.062019	0.999997	336	histone cluster 1, H3e	319151	319151	Hist1h3e
ENSMUSG00000025746	3.56225	0.950318	3.41284	1.40474	7.29486	2.86688	0.105085	0.999997	337	interleukin 6	16193	16193	Il6
ENSMUSG00000035916	0.236019	0.0472188	0.159095	0.0313438	4.55686	2.18804	0.0605887	0.999997	338	protein tyrosine phosphatase, receptor type, Q	237523	237523	Ptprq
ENSMUSG00000022157	9.9216	3.91319	10.4698	5.49769	7.42826	2.89302	0.10626	0.999997	339	mast cell protease 8	17231	17231	Mcpt8
ENSMUSG00000105935	0.461204	1.45826	0.602725	0.887362	-4.3651	-2.12602	0.0541165	0.999997	340	predicted gene 43628	NA		Gm43628
ENSMUSG00000026587	0.0631762	0.116902	0.0995458	0.0345245	-4.57145	-2.19265	0.0623681	0.999997	341	astrotactin 1	11899	11899	Astn1
ENSMUSG00000049128	8.4282	2.62118	8.16807	2.30956	4.63959	2.214	0.0655852	0.999997	342	involucrin	16447	16447	Ivl
ENSMUSG00000104876	3.75189	0.990643	4.72474	1.19298	8.25727	3.04566	0.111545	0.999997	343	T cell receptor delta, constant region	NA		Trdc
ENSMUSG00000029680	1.2671	0.0670937	1.53331	0.0639294	9.64433	3.26968	0.11601	0.999997	344	hyaluronoglucosaminidase 4	77042	77042	Hyal4
ENSMUSG00000042453	4.04146	46.2938	2.55787	58.3324	-6.3684	-2.67093	0.100404	0.999997	345	reelin	19699	19699	Reln
ENSMUSG00000026321	11.7389	31.8204	16.3686	20.4326	-6.27568	-2.64977	0.0989484	0.999997	346	tumor necrosis factor receptor superfamily, member 11a, NFKB activator	21934	21934	Tnfrsf11a
ENSMUSG00000037202	2.22365	48.2878	1.84491	63.3643	-13.8047	-3.78709	0.121349	0.999997	347	perforin 1 (pore forming protein)	18646	18646	Prf1
ENSMUSG00000056078	0.895416	0.121805	0.654879	0.11606	6.55399	2.71237	0.10323	0.999997	348	lipase, family member M	78753	78753	Lipm
ENSMUSG00000062991	5.00763	1.54714	2.45995	1.28641	4.87666	2.28589	0.0748546	0.999997	349	neuregulin 1	211323	211323	Nrg1
ENSMUSG00000108035	0.0676487	0.552269	0.103431	0.532028	-8.21734	-3.03867	0.112377	0.999997	350	predicted gene, 44021	NA		Gm44021
ENSMUSG00000097014	0.818332	0.175352	0.257524	0.303719	4.50301	2.17089	0.0621257	0.999997	351	predicted gene, 26706	NA		Gm26706
ENSMUSG00000024109	0.0433617	0.0128094	0.0257565	0.0143979	4.89533	2.29141	0.0755398	0.999997	352	neurexin I	18189	18189	Nrxn1
ENSMUSG00000106019	2.50352	9.84145	1.77837	5.28888	-4.22455	-2.0788	0.0523897	0.999997	353	predicted gene 43672	NA		Gm43672
ENSMUSG00000009378	2.22134	14.8342	1.77761	16.8076	-5.38874	-2.42995	0.087446	0.999997	354	solute carrier family 16 (monocarboxylic acid transporters), member 12	240638	240638	Slc16a12
ENSMUSG00000109438	0.499441	0.131297	0.259455	0.0922482	3.944	1.97966	0.0327143	0.999997	355	predicted gene 45073	NA		Gm45073
ENSMUSG00000107667	1.87405	0.612522	0.243053	0.595331	3.93885	1.97777	0.0322566	0.999997	356	RIKEN cDNA C530044C16 gene	NA		C530044C16Rik
ENSMUSG00000021872	0.696393	0.146804	0.10465	0.092135	4.24727	2.08654	0.0535313	0.999997	357	ribonuclease, RNase A family, 10 (non-active)	75019	75019	Rnase10
ENSMUSG00000032271	77.2105	20.8385	41.6355	17.1451	5.2624	2.39572	0.0854976	0.999997	358	nicotinamide N-methyltransferase	18113	18113	Nnmt
ENSMUSG00000063234	2.3162	0.68151	1.59781	0.671444	6.04321	2.59532	0.0986196	0.999997	359	G protein-coupled receptor 84	80910	80910	Gpr84
ENSMUSG00000038193	2.14495	0.688955	2.19572	0.871163	6.19462	2.63102	0.100012	0.999997	360	heart and neural crest derivatives expressed transcript 2	15111	15111	Hand2
ENSMUSG00000034872	0.651962	3.20754	0.327573	1.60686	-4.14497	-2.05136	0.0485951	0.999997	361	GIPC PDZ domain containing family, member 3	209047	209047	Gipc3
ENSMUSG00000097770	0.906358	1.27728	1.54353	0.647728	-8.62627	-3.10874	0.115117	0.999997	362	predicted gene, 26776	NA		Gm26776
ENSMUSG00000111756	0.5204	0.936962	0.707687	0.463996	-5.44602	-2.4452	0.0897758	0.999997	363		NA		AC122876.1
ENSMUSG00000026831	12.2701	3.05402	5.4552	1.45124	4.12833	2.04556	0.0477115	0.999997	364	RIKEN cDNA 1700007K13 gene	69327	69327	1700007K13Rik
ENSMUSG00000030283	5.35143	1.50528	0.57756	1.25293	4.73145	2.24228	0.0736425	0.999997	365	ST8 alpha-N-acetyl-neuraminide alpha-2,8-sialyltransferase 1	20449	20449	St8sia1
ENSMUSG00000040569	0.190783	0.0893953	0.198887	0.154837	5.82419	2.54206	0.0969332	0.999997	366	solute carrier family 26, member 7	208890	208890	Slc26a7
ENSMUSG00000048534	0.371153	0.0599506	0.242218	0.0584242	4.56736	2.19136	0.0675728	0.999997	367	junction adhesion molecule like	270152	270152	Jaml
ENSMUSG00000090291	4.79471	23.9743	3.28001	17.7789	-4.55594	-2.18775	0.0668917	0.999997	368	leucine rich repeat containing 10B	278795	278795	Lrrc10b
ENSMUSG00000001948	14.7161	44.0911	18.536	22.6437	-5.48956	-2.45669	0.0929739	0.999997	369	sperm autoantigenic protein 17	20686	20686	Spa17
ENSMUSG00000086266	0.0516965	0.431411	0.0638052	0.581858	-5.01848	-2.32725	0.0837395	0.999997	370	insulin-like growth factor 2, opposite strand	NA		Igf2os
ENSMUSG00000021943	2.3774	82.3773	2.63297	124.491	-14.6987	-3.87762	0.125888	0.999997	371	growth differentiation factor 10	14560	14560	Gdf10
ENSMUSG00000027068	0.626402	0.149224	0.29684	0.0819257	4.39227	2.13497	0.0622887	0.999997	372	dehydrogenase/reductase (SDR family) member 9	241452	241452	Dhrs9
ENSMUSG00000057228	0.71855	0.219285	0.387769	0.241225	5.59705	2.48467	0.0955788	0.999997	373	aminoadipate aminotransferase	23923	23923	Aadat
ENSMUSG00000074121	0.235923	0.0413361	0.157408	0.0393866	4.0912	2.03253	0.0479655	0.999997	374	neurotrophin 5	78405	78405	Ntf5
ENSMUSG00000112963	1.32683	0.324465	1.74218	0.512936	10.6666	3.41503	0.122694	0.999997	375		NA		AL513022.1
ENSMUSG00000031298	3.07573	0.999034	1.08871	0.708371	4.09299	2.03316	0.0489036	0.999997	376	adhesion G protein-coupled receptor G2	237175	237175	Adgrg2
ENSMUSG00000027716	6.84567	23.3627	8.50583	5.27152	-6.59357	-2.72106	0.107854	0.999997	377	transient receptor potential cation channel, subfamily C, member 3	22065	22065	Trpc3
ENSMUSG00000040003	0.61869	0.211787	0.365862	0.160157	3.8363	1.93972	0.030983	0.999997	378	membrane associated guanylate kinase, WW and PDZ domain containing 2	50791	50791	Magi2
ENSMUSG00000050967	1.02011	5.14619	1.32713	4.22148	-7.15001	-2.83795	0.11121	0.999997	379	cellular repressor of E1A-stimulated genes 2	263764	263764	Creg2
ENSMUSG00000063564	68.1017	319.725	87.3341	252.872	-6.19288	-2.63061	0.10401	0.999997	380	collagen, type XXIII, alpha 1	237759	237759	Col23a1
ENSMUSG00000055254	0.630635	0.242408	0.208814	0.237132	4.34768	2.12025	0.0626527	0.999997	381	neurotrophic tyrosine kinase, receptor, type 2	18212	18212	Ntrk2
ENSMUSG00000053279	2.94377	0.383555	3.78607	0.325281	8.00139	3.00025	0.11595	0.999997	382	aldehyde dehydrogenase family 1, subfamily A1	11668	11668	Aldh1a1
ENSMUSG00000102615	1.52984	5.84689	1.77604	3.94966	-5.51232	-2.46266	0.0965623	0.999997	383	predicted gene, 37844	NA		Gm37844
ENSMUSG00000047363	0.198676	1.25792	0.209749	0.62294	-4.86699	-2.28303	0.0823387	0.999997	384	CSA-conditional, T cell activation-dependent protein	78617	78617	Cstad
ENSMUSG00000030737	0.668224	1.59293	0.826729	1.0814	-4.57057	-2.19238	0.0719198	0.999997	385	solute carrier organic anion transporter family, member 2b1	101488	101488	Slco2b1
ENSMUSG00000041703	0.104193	0.279472	0.151154	0.17437	-4.56728	-2.19134	0.0718751	0.999997	386	zinc finger protein of the cerebellum 5	65100	65100	Zic5
ENSMUSG00000029167	1.24866	4.13158	0.542436	2.10064	-3.64858	-1.86734	0.0130577	0.999997	387	peroxisome proliferative activated receptor, gamma, coactivator 1 alpha	19017	19017	Ppargc1a
ENSMUSG00000024803	297.462	58.5213	198.343	39.7041	4.79663	2.26202	0.0813015	0.999997	388	ankyrin repeat domain 1 (cardiac muscle)	107765	107765	Ankrd1
ENSMUSG00000039257	2.89465	0.403978	3.11208	0.699711	18.7277	4.2271	0.130196	0.999997	389	V-set and transmembrane domain containing 2B	58188	58188	Vstm2b
ENSMUSG00000024511	1.56238	0.261859	1.21053	0.196159	5.86248	2.55151	0.102348	0.999997	390	RAB27B, member RAS oncogene family	80718	80718	Rab27b
ENSMUSG00000024076	0.48237	0.11391	0.386172	0.0603067	4.09646	2.03438	0.0529811	0.999997	391	vitrin	74199	74199	Vit
ENSMUSG00000070419	0.227016	0	0.244936	0	5.64602	2.49724	0.0987567	0.999997	392	cytochrome P450, family 3, subfamily a, polypeptide 57	622127	622127	Cyp3a57
ENSMUSG00000002289	59.6956	15.8913	51.0643	11.5504	4.08436	2.03011	0.0529261	0.999997	393	angiopoietin-like 4	57875	57875	Angptl4
ENSMUSG00000112117	0.0605563	0.00542998	0.0359699	0.00940499	4.56552	2.19078	0.0745144	0.999997	394	Rhabdomyosarcoma 2 associated transcript conserved region 1	NA		RMST_1
ENSMUSG00000098186	1.19965	0.327697	0.763848	0.567588	5.34202	2.41739	0.0950087	0.999997	395	predicted gene 7132	NA		Gm7132
ENSMUSG00000036330	9.31009	40.204	5.41434	43.8406	-4.30326	-2.10543	0.065862	0.999997	396	solute carrier family 18 (vesicular monoamine), member 1	110877	110877	Slc18a1
ENSMUSG00000044033	1.50408	13.3043	0.808399	16.3817	-5.06699	-2.34113	0.0895366	0.999997	397	coiled-coil domain containing 141	545428	545428	Ccdc141
ENSMUSG00000001604	2.2322	0.442622	2.32988	0.234335	4.9778	2.31551	0.0878084	0.999997	398	transcription elongation factor A (SII), 3	21401	21401	Tcea3
ENSMUSG00000083807	1.27254	0.30619	0.283835	0.248985	4.26086	2.09115	0.0657434	0.999997	399	predicted gene 13466	NA		Gm13466
ENSMUSG00000061048	0.217267	0.044758	0.2531	0.0775231	6.20745	2.634	0.108829	0.999997	400	cadherin 3	12560	12560	Cdh3
ENSMUSG00000043631	2.13785	9.9198	1.35328	8.50001	-4.27893	-2.09725	0.0662913	0.999997	401	extracellular matrix protein 2, female organ and adipocyte specific	407800	407800	Ecm2
ENSMUSG00000112441	0.151223	0.025967	0.128208	0.0449762	4.28177	2.09821	0.0666736	0.999997	402		NA		AC122860.2
ENSMUSG00000111059	0.733294	0.176483	0.208659	0.305678	4.93808	2.30395	0.0875895	0.999997	403		NA		AC160116.1
ENSMUSG00000111094	1.12837	0.555998	0.487314	0.817984	4.70867	2.23532	0.083866	0.999997	404		NA		AC145731.1
ENSMUSG00000105217	0.159852	0.505658	0.197293	0.175105	-3.91708	-1.96978	0.0474403	0.999997	405	predicted gene 42873	NA		Gm42873
ENSMUSG00000020681	10.4132	1.98377	7.39226	1.64937	5.07556	2.34357	0.0921672	0.999997	406	angiotensin I converting enzyme (peptidyl-dipeptidase A) 1	11421	11421	Ace
ENSMUSG00000028167	0.936308	0.233629	0.852583	0.13781	4.15806	2.05591	0.0614635	0.999997	407	3-hydroxybutyrate dehydrogenase, type 2	69772	69772	Bdh2
ENSMUSG00000027073	0.859485	0.174248	0.44376	0.153338	3.99651	1.99874	0.0531073	0.999997	408	proteoglycan 2, bone marrow	19074	19074	Prg2
ENSMUSG00000051048	1.2356	0.506134	0.455092	0.55157	4.41229	2.14153	0.0721859	0.999997	409	procollagen-proline, 2-oxoglutarate 4-dioxygenase (proline 4-hydroxylase), alpha polypeptide III	320452	320452	P4ha3
ENSMUSG00000030246	32.6978	11.2139	8.85923	11.3995	4.32077	2.11129	0.0706949	0.999997	410	lactate dehydrogenase B	16832	16832	Ldhb
ENSMUSG00000052353	6.02589	0.812854	8.63383	0.610719	8.2265	3.04028	0.123424	0.999997	411	cell migration inducing protein, hyaluronan binding	80982	80982	Cemip
ENSMUSG00000052188	5.40433	21.2245	3.41768	18.0142	-3.90485	-1.96527	0.0504995	0.999997	412	predicted gene 14964	NA		Gm14964
ENSMUSG00000034438	0.654327	0.124359	0.496207	0.168467	4.64653	2.21615	0.0845661	0.999997	413	guanylate-binding protein 8	76074	76074	Gbp8
ENSMUSG00000111434	0.592364	2.56648	0.253038	1.07594	-4.28773	-2.10022	0.0706142	0.999997	414		NA		AC120394.2
ENSMUSG00000084644	1.54859	8.31966	2.68224	1.4201	-3.81257	-1.93076	0.0441644	0.999997	415	predicted gene, 24379	NA		Gm24379
ENSMUSG00000023931	0.488618	0.132095	0.0870249	0.165754	4.29611	2.10303	0.0711349	0.999997	416	EF hand domain family, member B	211482	211482	Efhb
ENSMUSG00000105041	0.625168	2.24379	0.453254	1.09068	-3.79908	-1.92565	0.0435336	0.999997	417	predicted gene 42676	NA		Gm42676
ENSMUSG00000034164	15.6872	63.353	12.6947	38.7179	-4.42589	-2.14597	0.0757157	0.999997	418	EMI domain containing 1	140703	140703	Emid1
ENSMUSG00000079049	5.91326	2.25776	2.46654	2.1157	4.25817	2.09023	0.0705383	0.999997	419	serine (or cysteine) peptidase inhibitor, clade B, member 1c	380839	380839	Serpinb1c
ENSMUSG00000054931	0.173266	0.856414	0.0740135	0.652503	-4.20031	-2.07049	0.0672944	0.999997	420	zinc finger with KRAB and SCAN domains 4	544922	544922	Zkscan4
ENSMUSG00000054412	0.482936	2.22699	0.474862	2.10346	-4.50041	-2.17006	0.0796018	0.999997	421	predicted gene 4793	NA		Gm4793
ENSMUSG00000029095	1.33226	8.31586	0.521692	7.74982	-4.48823	-2.16615	0.07979	0.999997	422	actin-binding LIM protein 2	231148	231148	Ablim2
ENSMUSG00000081005	0.529848	0.698275	0.917724	0.187686	-5.63217	-2.49369	0.106324	0.999997	423	predicted gene 13198	NA		Gm13198
ENSMUSG00000021680	26.4374	10.5562	14.4242	11.2108	5.89504	2.5595	0.110017	0.999997	424	corticotropin releasing hormone binding protein	12919	12919	Crhbp
ENSMUSG00000026833	189.341	1379.06	158.46	1631.51	-5.25511	-2.39372	0.0992948	0.999997	425	olfactomedin 1	56177	56177	Olfm1
ENSMUSG00000037014	0.77749	0.179554	0.322139	0.0652526	3.58151	1.84057	0.0271807	0.999997	426	somatostatin receptor 4	20608	20608	Sstr4
ENSMUSG00000063506	26.1431	7.3735	14.4098	6.47667	4.68773	2.22889	0.0876804	0.999997	427	Rho GTPase activating protein 22	239027	239027	Arhgap22
ENSMUSG00000091636	0.355129	0.0762504	0.232785	0.0205876	3.86396	1.95008	0.0516839	0.999997	428	A kinase (PRKA) anchor inhibitor 1	320722	320722	Akain1
ENSMUSG00000091017	0.316715	0.0310465	0.348353	0.0537742	5.44738	2.44556	0.104256	0.999997	429	family with sequence similarity 71, member A	619288	619288	Fam71a
ENSMUSG00000011008	0.557109	0.152103	0.128686	0.0355117	3.51414	1.81317	0.0193382	0.999997	430	mucolipin 2	68279	68279	Mcoln2
ENSMUSG00000112711	0.328584	0	0.391346	0	6.00595	2.58639	0.112973	0.999997	431		NA		AC135019.3
ENSMUSG00000097056	4.32011	1.13731	2.72218	1.00073	5.36684	2.42407	0.103279	0.999997	432	predicted gene 4262	NA		Gm4262
ENSMUSG00000031636	0.125929	8.12612	0.186452	13.534	-29.5536	-4.88526	0.14132	0.999997	433	PDZ and LIM domain 3	53318	53318	Pdlim3
ENSMUSG00000021440	2.05025	0.695609	1.16864	0.606645	4.44759	2.15302	0.0814254	0.999997	434	cathepsin 7	56092	56092	Cts7
ENSMUSG00000000794	1.63887	7.01286	1.78036	5.96305	-5.12173	-2.35663	0.0986623	0.999997	435	potassium intermediate/small conductance calcium-activated channel, subfamily N, member 3	140493	140493	Kcnn3
ENSMUSG00000055980	2.54044	0.911894	1.61724	0.742625	3.99276	1.99739	0.0611134	0.999997	436	insulin receptor substrate 1	16367	16367	Irs1
ENSMUSG00000026748	10.7054	3.57459	4.63655	2.97952	4.13062	2.04636	0.0679656	0.999997	437	plexin domain containing 2	67448	67448	Plxdc2
ENSMUSG00000032281	1.65966	0.363457	1.82364	0.537987	11.1978	3.48514	0.135573	0.999997	438	acyl-CoA synthetase bubblegum family member 1	94180	94180	Acsbg1
ENSMUSG00000022122	230.302	634.341	379.694	435.773	-12.0516	-3.59115	0.136466	0.999997	439	endothelin receptor type B	13618	13618	Ednrb
ENSMUSG00000025723	34.3423	74.2522	49.8389	24.5093	-6.39394	-2.6767	0.117636	0.999997	440	neuromedin B	68039	68039	Nmb
ENSMUSG00000050334	0.174763	0.0244908	0.174723	0.0424193	5.26799	2.39725	0.102554	0.999997	441	RIKEN cDNA C130071C03 gene	NA		C130071C03Rik
ENSMUSG00000092335	0.397526	1.29208	0.49521	0.467569	-4.40417	-2.13887	0.0806282	0.999997	442	zinc finger protein 977	208111	208111	Zfp977
ENSMUSG00000050217	0.548862	0.126189	0.189487	0.0791971	4.16324	2.05771	0.0702502	0.999997	443	lengsin, lens protein with glutamine synthetase domain	266744	266744	Lgsn
ENSMUSG00000046908	1.20429	0.311842	0.0855828	0.156502	3.63007	1.86	0.0361908	0.999997	444	leukotriene B4 receptor 1	16995	16995	Ltb4r1
ENSMUSG00000109783	0.19258	0.0343218	0.166678	0.0410414	4.29063	2.10119	0.0786021	0.999997	445	predicted gene 45338	NA		Gm45338
ENSMUSG00000040154	0.0360219	0.224488	0.0429023	0.0989888	-4.24529	-2.08586	0.076006	0.999997	446	WAP four-disulfide core domain 5	209232	209232	Wfdc5
ENSMUSG00000057726	4.24714	0.323935	6.67145	0.561071	14.6727	3.87507	0.140027	0.999997	447	serine (or cysteine) peptidase inhibitor, clade B, member 9g	93806	93806	Serpinb9g
ENSMUSG00000016028	25.8385	84.6821	29.356	29.0132	-4.80538	-2.26465	0.0951068	0.999997	448	cadherin, EGF LAG seven-pass G-type receptor 1	12614	12614	Celsr1
ENSMUSG00000032122	3.21723	0.832775	0.82961	0.580346	4.01735	2.00624	0.0652849	0.999997	449	solute carrier family 37 (glycerol-3-phosphate transporter), member 2	56857	56857	Slc37a2
ENSMUSG00000047712	4.23684	1.43412	2.55826	0.772682	3.69074	1.88391	0.0468757	0.999997	450	uronyl-2-sulfotransferase	338362	338362	Ust
ENSMUSG00000085126	1.85093	0.56859	0.854483	0.984827	4.80307	2.26396	0.0957377	0.999997	451	predicted gene 12589	NA		Gm12589
ENSMUSG00000021675	0.527596	0.110884	0.508808	0.192057	6.45429	2.69026	0.120912	0.999997	452	coagulation factor II (thrombin) receptor-like 2	14064	14064	F2rl2
ENSMUSG00000101872	1.27948	0.179941	0.58903	0.311666	3.99394	1.99781	0.0652198	0.999997	453	predicted gene 29237	NA		Gm29237
ENSMUSG00000062591	8.98132	1.21266	13.6314	1.29764	10.7979	3.43268	0.137988	0.999997	454	tubulin, beta 4A class IVA	22153	22153	Tubb4a
ENSMUSG00000010797	0.356329	3.18264	0.300137	4.17675	-5.15312	-2.36545	0.103272	0.999997	455	wingless-type MMTV integration site family, member 2	22413	22413	Wnt2
ENSMUSG00000108291	0.454941	1.18581	0.408515	0.280746	-3.50378	-1.80891	0.0297001	0.999997	456	predicted gene, 44292	NA		Gm44292
ENSMUSG00000086804	2.16962	0.802438	0.935149	0.633186	3.70827	1.89074	0.0502425	0.999997	457	predicted gene 43154	NA		Gm43154
ENSMUSG00000068601	0.147301	0.706395	0.130858	0.166187	-3.54781	-1.82693	0.0344972	0.999997	458	predicted gene 10244	NA		Gm10244
ENSMUSG00000071531	0.21193	0.988721	0.257923	0.208908	-4.25472	-2.08906	0.0810884	0.999997	459	G protein regulated inducer of neurite outgrowth 2	432839	432839	Gprin2
ENSMUSG00000025885	0.437427	5.39125	0.3534	6.57578	-7.74091	-2.9525	0.130332	0.999997	460	myosin VB	17919	17919	Myo5b
ENSMUSG00000054728	0.357131	0.171835	0.182523	0.198881	4.69019	2.22965	0.095632	0.999997	461	phosphatase and actin regulator 1	218194	218194	Phactr1
ENSMUSG00000040690	3.14486	1.5113	2.35311	2.00212	4.80616	2.26488	0.098067	0.999997	462	collagen, type XVI, alpha 1	107581	107581	Col16a1
ENSMUSG00000026592	0.600245	0.0598411	0.286734	0.103648	5.11399	2.35445	0.104586	0.999997	463	testis expressed 35	73435	73435	Tex35
ENSMUSG00000049313	0.252553	0.0542116	0.184962	0.0372891	5.0657	2.34076	0.104251	0.999997	464	sortilin-related receptor, LDLR class A repeats-containing	20660	20660	Sorl1
ENSMUSG00000046561	1.00571	0.217414	0.842416	0.09983	4.83116	2.27237	0.0990521	0.999997	465	arylsulfatase J	271970	271970	Arsj
ENSMUSG00000099568	4.04734	1.43541	2.38765	1.70193	4.44263	2.15142	0.087839	0.999997	466	predicted gene 28513	NA		Gm28513
ENSMUSG00000045083	0.145527	0.0408445	0.087058	0.0380303	4.96523	2.31186	0.102673	0.999997	467	leucine rich repeat and Ig domain containing 2	242384	242384	Lingo2
ENSMUSG00000055301	0.218043	0.0366295	0.213722	0.0634442	4.91919	2.29842	0.102046	0.999997	468	alcohol dehydrogenase 7 (class IV), mu or sigma polypeptide	11529	11529	Adh7
ENSMUSG00000028749	0.0154366	1.2943	0.0267369	1.79487	-9.05682	-3.179	0.137983	0.999997	469	phospholipase A2, group IIF	26971	26971	Pla2g2f
ENSMUSG00000041624	1.01065	0.397249	0.671062	0.41755	4.1551	2.05488	0.0790817	0.999997	470	guanylate cyclase 1, soluble, alpha 2	234889	234889	Gucy1a2
ENSMUSG00000042804	4.82225	1.8135	4.01852	1.79423	4.23762	2.08325	0.0833699	0.999997	471	G protein-coupled receptor 153	100129	100129	Gpr153
ENSMUSG00000001014	0.608192	0.0726247	0.257043	0.12579	4.32554	2.11288	0.0862774	0.999997	472	intercellular adhesion molecule 4, Landsteiner-Wiener blood group	78369	78369	Icam4
ENSMUSG00000108655	1.04626	3.37809	1.20686	2.02879	-4.47771	-2.16276	0.0908995	0.999997	473	predicted gene 44949	NA		Gm44949
ENSMUSG00000051279	1.23277	0.140646	1.88542	0.187461	7.89499	2.98094	0.133697	0.999997	474	growth differentiation factor 6	242316	242316	Gdf6
ENSMUSG00000105843	1.84704	0.622255	0.720883	0.641595	5.65371	2.4992	0.116336	0.999997	475	predicted gene 42644	NA		Gm42644
ENSMUSG00000109930	0.301606	0.135127	0.18491	0.193866	4.62182	2.20846	0.0961096	0.999997	476	predicted gene 45649	NA		Gm45649
ENSMUSG00000001665	3.17855	1.24072	0.390944	1.0864	4.31788	2.11032	0.0867432	0.999997	477	glutathione S-transferase, theta 3	103140	103140	Gstt3
ENSMUSG00000110692	0.248468	1.74153	0.430359	1.0232	-4.03289	-2.01181	0.0733156	0.999997	478	predicted gene 45761	NA		Gm45761
ENSMUSG00000113065	0.0988067	0.475479	0.0586959	0.31962	-3.9844	-1.99436	0.071037	0.999997	479		NA		AC131743.1
ENSMUSG00000022821	4.58916	1.84354	2.97381	2.54225	5.40917	2.43541	0.113088	0.999997	480	homogentisate 1, 2-dioxygenase	15233	15233	Hgd
ENSMUSG00000034792	2.86327	0.613255	2.50791	0.592007	5.4445	2.4448	0.113663	0.999997	481	guanine nucleotide binding protein, alpha 15	14676	14676	Gna15
ENSMUSG00000075602	22.5231	6.37185	12.1349	4.05388	4.07801	2.02787	0.0761604	0.999997	482	lymphocyte antigen 6 complex, locus A	110454	110454	Ly6a
ENSMUSG00000013483	0.32098	1.99474	0.323227	1.79009	-4.43595	-2.14924	0.0915264	0.999997	483	caspase recruitment domain family, member 14	170720	170720	Card14
ENSMUSG00000024647	7.14949	4.35532	4.16673	6.70238	6.35892	2.66878	0.126308	0.999997	484	cerebellin 2 precursor protein	12405	12405	Cbln2
ENSMUSG00000037860	32.15	8.60111	16.1026	7.24571	5.48154	2.45458	0.115406	0.999997	485	absent in melanoma 2	383619	383619	Aim2
ENSMUSG00000055976	0.239161	0.035393	0.220948	0.0613025	4.55195	2.18649	0.0953593	0.999997	486	claudin 23	71908	71908	Cldn23
ENSMUSG00000038630	0.19295	0.988898	0.168794	0.660214	-4.97086	-2.3135	0.106048	0.999997	487	zinc finger with KRAB and SCAN domains 16	100041581	100041581	Zkscan16
ENSMUSG00000101711	0.741839	0.131112	0.332736	0.227092	4.20052	2.07057	0.0845939	0.999997	488	predicted gene 28306	NA		Gm28306
ENSMUSG00000090081	1.70827	0.521337	0.579565	0.45529	3.90362	1.96481	0.0691895	0.999997	489	predicted gene 16587	NA		Gm16587
ENSMUSG00000026177	0.412009	0.0857594	0.358974	0.121377	5.79162	2.53397	0.120784	0.999997	490	solute carrier family 11 (proton-coupled divalent metal ion transporters), member 1	18173	18173	Slc11a1
ENSMUSG00000082193	1.00698	0.253505	0.067714	0.272115	3.65721	1.87075	0.0544021	0.999997	491	ribosomal protein L5, pseudogene 1	NA		Rpl5-ps1
ENSMUSG00000074945	0.222576	0.0466116	0.132206	0.0807336	5.22406	2.38517	0.111032	0.999997	492	olfactory receptor 1314	258442	258442	Olfr1314
ENSMUSG00000015533	9.90123	1.9626	4.91993	1.00372	4.81525	2.26761	0.103548	0.999997	493	integrin alpha 2	16398	16398	Itga2
ENSMUSG00000068417	1.41455	0.42327	0.504336	0.124452	3.3088	1.72631	0.0196436	0.999997	494	purine-nucleoside phosphorylase 2	667034	667034	Pnp2
ENSMUSG00000020609	0.101839	0.00967161	0.131182	0.00838666	6.28375	2.65163	0.127126	0.999997	495	apolipoprotein B	238055	238055	Apob
ENSMUSG00000089769	3.35325	1.04654	1.16862	1.34271	3.97492	1.99092	0.075011	0.999997	496	predicted gene 16574	NA		Gm16574
ENSMUSG00000024521	137.461	24.0944	107.227	14.7098	5.23778	2.38896	0.112415	0.999997	497	phorbol-12-myristate-13-acetate-induced protein 1	58801	58801	Pmaip1
ENSMUSG00000097547	0.865465	0.0409045	1.06939	0.0708487	6.32051	2.66004	0.127641	0.999997	498	RIKEN cDNA B230110C06 gene	NA		B230110C06Rik
ENSMUSG00000021684	1.24631	9.34101	0.737781	5.14259	-6.45533	-2.69049	0.12946	0.999997	499	phosphodiesterase 8B	218461	218461	Pde8b
ENSMUSG00000022483	0.410852	0.105895	0.386516	0.149876	5.7684	2.52817	0.121577	0.999997	500	collagen, type II, alpha 1	12824	12824	Col2a1
ENSMUSG00000020892	5.59892	2.88238	3.72104	3.38578	4.42776	2.14658	0.0943599	0.999997	501	arachidonate lipoxygenase 3	23801	23801	Aloxe3
ENSMUSG00000027674	0.126954	0.0470436	0.100904	0.081482	5.52275	2.46539	0.120025	0.999997	502	peroxisomal biogenesis factor 5-like	58869	58869	Pex5l
ENSMUSG00000052248	1.02644	0.231333	0.339978	0.0713212	3.56374	1.83339	0.0514709	0.999997	503	zinc finger E-box binding homeobox 2, opposite strand	NA		Zeb2os
ENSMUSG00000069806	3.37659	1.15201	4.26904	1.47392	9.63395	3.26813	0.145625	0.999997	504	calcium channel, voltage-dependent, gamma subunit 7	81904	81904	Cacng7
ENSMUSG00000109435	0.162499	0.626309	0.176578	0.391041	-3.68724	-1.88254	0.0614912	0.999997	505	predicted gene 7067	NA		Gm7067
ENSMUSG00000029869	2.53332	1.48767	1.44686	1.9755	4.21178	2.07443	0.0880421	0.999997	506	Eph receptor B6	13848	13848	Ephb6
ENSMUSG00000031450	0.138131	0.00458865	0.130725	0.00794778	7.7491	2.95403	0.139622	0.999997	507	G protein-coupled receptor kinase 1	24013	24013	Grk1
ENSMUSG00000021069	1.0736	0.276234	1.00596	0.077815	3.96777	1.98833	0.079206	0.999997	508	liver glycogen phosphorylase	110095	110095	Pygl
ENSMUSG00000045215	5.15773	10.2487	6.82634	3.57404	-4.26758	-2.09342	0.0928688	0.999997	509	additional sex combs like 3 (Drosophila)	211961	211961	Asxl3
ENSMUSG00000041923	1.90888	0.446284	0.87135	0.267531	4.07485	2.02675	0.083973	0.999997	510	nucleolar protein 4	319211	319211	Nol4
ENSMUSG00000020614	10.9952	26.96	14.6038	12.4322	-5.33022	-2.4142	0.117477	0.999997	511	family with sequence similarity 20, member A	208659	208659	Fam20a
ENSMUSG00000104066	0.448716	3.99483	0.777199	3.3472	-4.21797	-2.07655	0.0905042	0.999997	512	predicted gene, 37955	NA		Gm37955
ENSMUSG00000010651	0.339841	0.0410874	0.219301	0.0711654	4.14067	2.04986	0.0875333	0.999997	513	acetyl-Coenzyme A acyltransferase 1B	235674	235674	Acaa1b
ENSMUSG00000037664	10.7532	29.348	12.4909	11.274	-4.62162	-2.2084	0.103466	0.999997	514	cyclin-dependent kinase inhibitor 1C (P57)	12577	12577	Cdkn1c
ENSMUSG00000075304	28.9913	6.866	20.847	4.99988	4.9112	2.29608	0.109708	0.999997	515	trans-acting transcription factor 5	64406	64406	Sp5
ENSMUSG00000021448	8.05336	29.9829	8.48502	18.1742	-5.03367	-2.33161	0.113262	0.999997	516	src homology 2 domain-containing transforming protein C3	20418	20418	Shc3
ENSMUSG00000042672	0.472884	0.127694	0.243948	0.110805	4.28141	2.09809	0.0942008	0.999997	517	DC-STAMP domain containing 1	77772	77772	Dcst1
ENSMUSG00000082088	0.132504	0.67372	0.115893	0.114999	-3.60757	-1.85103	0.0581241	0.999997	518	predicted gene 15753	NA		Gm15753
ENSMUSG00000028132	0.232481	0.0620851	0.108817	0.0389649	4.16791	2.05932	0.0888232	0.999997	519	transmembrane protein 56	99887	99887	Tmem56
ENSMUSG00000109140	0.760204	1.21003	1.29256	1.16698	-7.96696	-2.99403	0.141521	0.999997	520	predicted gene 45089	NA		Gm45089
ENSMUSG00000000142	0.188485	0.918155	0.0292498	0.691234	-3.81676	-1.93235	0.0716154	0.999997	521	axin 2	12006	12006	Axin2
ENSMUSG00000049690	3.63879	9.27536	2.5527	0.733342	-3.22491	-1.68926	0.0178056	0.999997	522	NCK-associated protein 5	210356	210356	Nckap5
ENSMUSG00000032186	19.379	65.8929	8.57083	27.7323	-3.28623	-1.71644	0.0283136	0.999997	523	tropomodulin 2	50876	50876	Tmod2
ENSMUSG00000098679	138.528	46.5485	148.485	49.9304	4.12539	2.04453	0.0875491	0.999997	524	microRNA 7688	NA		Mir7688
ENSMUSG00000026586	8.45152	2.37364	8.2625	2.15826	6.95903	2.79889	0.138201	0.999997	525	paired related homeobox 1	18933	18933	Prrx1
ENSMUSG00000071604	3.06514	13.9864	0.995906	11.732	-3.55937	-1.83162	0.0557697	0.999997	526	family with sequence similarity 189, member A2	381217	381217	Fam189a2
ENSMUSG00000112035	0.23042	0.873475	0.199245	0.633163	-3.74928	-1.90661	0.0692847	0.999997	527		NA		AC122018.1
ENSMUSG00000097429	1.92126	0.623479	0.698489	0.478945	3.76518	1.91272	0.0709605	0.999997	528	predicted gene, 26520	NA		Gm26520
ENSMUSG00000027219	1.05258	0.381013	0.772841	0.364691	3.80179	1.92668	0.0730321	0.999997	529	solute carrier family 28 (sodium-coupled nucleoside transporter), member 2	269346	269346	Slc28a2
ENSMUSG00000041479	0.532737	1.26302	0.686685	1.35113	-5.95363	-2.57377	0.129803	0.999997	530	synaptotagmin XV	319508	319508	Syt15
ENSMUSG00000030587	14.4457	3.92769	8.80046	2.81273	4.09834	2.03504	0.0878781	0.999997	531	RIKEN cDNA 2200002D01 gene	72275	72275	2200002D01Rik
ENSMUSG00000050587	0.422789	0.19491	0.294596	0.337594	8.21789	3.03877	0.145694	0.999997	532	leucine rich repeat containing 4C	241568	241568	Lrrc4c
ENSMUSG00000026414	1.98208	0.655913	1.81743	0.59156	4.38353	2.13209	0.0989379	0.999997	533	troponin T2, cardiac	21956	21956	Tnnt2
ENSMUSG00000062257	0.0882916	0.0143312	0.0926539	0.0248223	6.65067	2.7335	0.138643	0.999997	534	opioid binding protein/cell adhesion molecule-like	330908	330908	Opcml
ENSMUSG00000018740	2.10096	6.86583	1.13429	3.05521	-3.33515	-1.73775	0.0384782	0.999997	535	solute carrier family 25, member 35	71998	71998	Slc25a35
ENSMUSG00000110148	0.141576	0.0499098	0.0901447	0.0864463	4.66107	2.22066	0.107739	0.999997	536	RIKEN cDNA 5830408C22 gene	NA		5830408C22Rik
ENSMUSG00000041324	299.324	38.5398	233.482	47.7683	8.33024	3.05836	0.147597	0.999997	537	inhibin beta-A	16323	16323	Inhba
ENSMUSG00000002059	48.6308	17.6632	11.5204	11.7883	3.46772	1.79399	0.0527248	0.999997	538	RAB34, member RAS oncogene family	19376	19376	Rab34
ENSMUSG00000021098	0.138452	0.0336956	0.0378922	0.0583625	4.64076	2.21436	0.106878	0.999997	539	RIKEN cDNA 4930447C04 gene	75801	75801	4930447C04Rik
ENSMUSG00000086040	0.420994	10.7276	0.59656	16.8361	-13.5995	-3.76548	0.155466	0.999997	540	WAS/WASL interacting protein family, member 3	330319	330319	Wipf3
ENSMUSG00000094251	2.38778	8.71283	2.59466	1.41334	-3.59732	-1.84692	0.0621398	0.999997	541	predicted gene, 25632	NA		Gm25632
ENSMUSG00000038578	10.3192	28.1837	10.2701	13.1041	-3.92709	-1.97346	0.0833179	0.999997	542	sushi domain containing 1	634731	634731	Susd1
ENSMUSG00000104436	0.198201	0.706131	0.117728	0.151224	-3.31324	-1.72824	0.0370618	0.999997	543	predicted gene, 37423	NA		Gm37423
ENSMUSG00000028780	1.48403	0.351945	1.7477	0.364869	6.08934	2.60629	0.132256	0.999997	544	sema domain, immunoglobulin domain (Ig), short basic domain, secreted, (semaphorin) 3C	20348	20348	Sema3c
ENSMUSG00000052726	0.303599	0.104718	0.269371	0.0982907	4.0201	2.00723	0.0866943	0.999997	545	potassium channel, subfamily T, member 2	240776	240776	Kcnt2
ENSMUSG00000000805	0.0935585	0.342114	0.115473	0.236452	-3.76404	-1.91228	0.0739771	0.999997	546	carbonic anhydrase 4	12351	12351	Car4
ENSMUSG00000044576	2.9146	1.10823	2.38665	1.19707	4.1793	2.06326	0.0945854	0.999997	547	GRB2 associated regulator of MAPK1 subtype 2	242915	242915	Garem2
ENSMUSG00000098749	18.1156	4.03339	9.23787	1.08411	3.76282	1.91181	0.0742359	0.999997	548	predicted gene, 27477	NA		Gm27477
ENSMUSG00000015365	0.240034	0.0497428	0.210911	0.086157	5.48785	2.45624	0.125735	0.999997	549	Moloney leukemia virus 10-like 1	83456	83456	Mov10l1
ENSMUSG00000032487	190.785	63.856	89.7943	40.0648	3.52904	1.81928	0.0572039	0.999997	550	prostaglandin-endoperoxide synthase 2	19225	19225	Ptgs2
ENSMUSG00000029379	0.464139	0.0345684	0.600387	0.0598742	6.3185	2.65958	0.13592	0.999997	551	chemokine (C-X-C motif) ligand 3	330122	330122	Cxcl3
ENSMUSG00000018776	1.4519	4.40349	1.79694	1.96784	-5.00565	-2.32356	0.116124	0.999997	552	solute carrier family 35, member G3	56293	56293	Slc35g3
ENSMUSG00000024502	0.179294	0.0344404	0.0458847	0.0596525	3.80407	1.92754	0.0767288	0.999997	553	janus kinase and microtubule interacting protein 2	76217	76217	Jakmip2
ENSMUSG00000032340	211.363	843.607	216.144	398.016	-5.45075	-2.44646	0.125583	0.999997	554	neogenin	18007	18007	Neo1
ENSMUSG00000022686	3.47778	0.921016	1.5281	0.149983	3.75731	1.9097	0.0748861	0.999997	555	UDP-GlcNAc:betaGal beta-1,3-N-acetylglucosaminyltransferase 5	108105	108105	B3gnt5
ENSMUSG00000037578	5.98365	27.5825	5.08643	16.0299	-4.91297	-2.29659	0.114936	0.999997	556	polycystic kidney disease 2-like 1	329064	329064	Pkd2l1
ENSMUSG00000020135	1.65374	0.630087	0.921058	0.365845	3.38675	1.7599	0.0475086	0.999997	557	adenomatosis polyposis coli 2	23805	23805	Apc2
ENSMUSG00000034810	0.729926	0.411386	0.595918	0.675132	6.10148	2.60916	0.135003	0.999997	558	sodium channel, voltage-gated, type VII, alpha	20272	20272	Scn7a
ENSMUSG00000026712	0.600202	7.66244	0.878852	11.5056	-9.16501	-3.19614	0.152926	0.999997	559	mannose receptor, C type 1	17533	17533	Mrc1
ENSMUSG00000097712	0.251859	0.0887102	0.126062	0.0904765	3.735	1.90111	0.0750603	0.999997	560	predicted gene 10532	NA		Gm10532
ENSMUSG00000057751	1.73118	19.3476	1.55991	19.818	-9.00524	-3.17076	0.152462	0.999997	561	multiple EGF-like-domains 6	230971	230971	Megf6
ENSMUSG00000034145	0.238773	0.0767393	0.0256184	0.0663898	3.44484	1.78444	0.0542578	0.999997	562	transmembrane protein 63c	217733	217733	Tmem63c
ENSMUSG00000040254	20.5532	77.2292	8.47489	48.2301	-3.30192	-1.7233	0.0410628	0.999997	563	sema domain, immunoglobulin domain (Ig), short basic domain, secreted, (semaphorin) 3D	108151	108151	Sema3d
ENSMUSG00000027524	0.506175	3.08989	0.27638	2.87881	-4.50186	-2.17052	0.106052	0.999997	564	endothelin 3	13616	13616	Edn3
ENSMUSG00000108350	4.96577	18.2251	4.37193	11.8632	-4.45619	-2.15581	0.104955	0.999997	565	predicted gene 44950	NA		Gm44950
ENSMUSG00000074361	2.97928	11.5728	3.23559	8.08455	-5.14	-2.36177	0.121673	0.999997	566	complement component 5a receptor 2	319430	319430	C5ar2
ENSMUSG00000034161	2.02979	0.748992	0.769191	0.789182	3.88641	1.95844	0.0854222	0.999997	567	scleraxis	20289	20289	Scx
ENSMUSG00000004902	0.60758	0.078478	0.457417	0.0685357	4.96856	2.31283	0.118965	0.999997	568	solute carrier family 25 (mitochondrial carrier), member 18	71803	71803	Slc25a18
ENSMUSG00000069267	1.42005	0.288746	0.666032	0.345277	4.24325	2.08517	0.0999587	0.999997	569	histone cluster 1, H3b	319150	319150	Hist1h3b
ENSMUSG00000053025	0.195383	0.0675479	0.111213	0.093131	5.0906	2.34784	0.121365	0.999997	570	synaptic vesicle glycoprotein 2 b	64176	64176	Sv2b
ENSMUSG00000021556	26.6716	7.80113	9.31299	4.29057	3.82361	1.93494	0.0835284	0.999997	571	golgi membrane protein 1	105348	105348	Golm1
ENSMUSG00000037225	12.0958	4.58127	7.99398	3.30948	3.63026	1.86007	0.070774	0.999997	572	fibroblast growth factor 2	14173	14173	Fgf2
ENSMUSG00000084565	4.3556	9.4109	3.88322	6.44225	-4.92824	-2.30107	0.119027	0.999997	573	microRNA 1901	NA		Mir1901
ENSMUSG00000046997	0.303401	0.105631	0.094419	0.0954283	5.08616	2.34658	0.123022	0.999997	574	splA/ryanodine receptor domain and SOCS box containing 4	211949	211949	Spsb4
ENSMUSG00000040138	0.196466	1.97754	0.0951016	2.3417	-4.7864	-2.25894	0.116475	0.999997	575	Norrie disease (pseudoglioma) (human)	17986	17986	Ndp
ENSMUSG00000079465	0.239504	0.0603867	0.135878	0.0184989	3.51883	1.81509	0.0640341	0.999997	576	collagen, type IV, alpha 3	12828	12828	Col4a3
ENSMUSG00000064329	0.341387	1.46765	0.251082	1.04251	-4.17161	-2.0606	0.0994865	0.999997	577	sodium channel, voltage-gated, type I, alpha	20265	20265	Scn1a
ENSMUSG00000021260	1.05098	0.400689	0.308649	0.256138	3.30419	1.7243	0.0478181	0.999997	578	hedgehog interacting protein-like 1	214305	214305	Hhipl1
ENSMUSG00000024678	6.69268	2.05804	5.73582	1.93335	5.44449	2.4448	0.129587	0.999997	579	membrane-spanning 4-domains, subfamily A, member 4D	66607	66607	Ms4a4d
ENSMUSG00000021457	3.30354	1.1463	1.02084	0.780766	3.86983	1.95227	0.0865547	0.999997	580	spleen tyrosine kinase	20963	20963	Syk
ENSMUSG00000086119	2.62195	8.07587	1.95746	4.29375	-3.34891	-1.74369	0.0527652	0.999997	581	predicted gene 2415	NA		Gm2415
ENSMUSG00000027656	14.9879	6.25103	19.1863	8.85686	6.57659	2.71734	0.14493	0.999997	582	WNT1 inducible signaling pathway protein 2	22403	22403	Wisp2
ENSMUSG00000007908	15.9286	4.72551	6.43928	3.43351	3.70666	1.89012	0.0799239	0.999997	583	3-hydroxymethyl-3-methylglutaryl-Coenzyme A lyase-like 1	208982	208982	Hmgcll1
ENSMUSG00000019890	28.7995	100.893	30.4145	73.2865	-4.43224	-2.14804	0.10873	0.999997	584	neurotensin	67405	67405	Nts
ENSMUSG00000092085	1.09804	0.219329	0.198363	0.208985	3.72442	1.89702	0.081925	0.999997	585	predicted gene 17224	NA		Gm17224
ENSMUSG00000051022	11.714	26.9637	11.8679	3.79897	-3.42268	-1.77513	0.0599859	0.999997	586	heparan sulfate (glucosamine) 3-O-sulfotransferase 1	15476	15476	Hs3st1
ENSMUSG00000006930	4.80113	14.7414	5.97656	12.1143	-5.05957	-2.33901	0.124602	0.999997	587	huntingtin-associated protein 1	15114	15114	Hap1
ENSMUSG00000022512	9.80318	1.95024	8.1315	2.3873	7.4612	2.89941	0.151375	0.999997	588	claudin 1	12737	12737	Cldn1
ENSMUSG00000042662	0.649726	0.191246	0.337964	0.130772	3.38905	1.76088	0.0568736	0.999997	589	dual specificity phosphatase-like 15	252864	252864	Dusp15
ENSMUSG00000037188	0.248158	0.014452	0.219531	0.0250316	4.84236	2.27571	0.12066	0.999997	590	grainyhead-like 3 (Drosophila)	230824	230824	Grhl3
ENSMUSG00000024663	17.2212	52.2052	13.5359	24.3178	-3.60934	-1.85173	0.0744415	0.999997	591	RAB3A interacting protein (rabin3)-like 1	74760	74760	Rab3il1
ENSMUSG00000051367	1.75717	0.549828	1.00752	0.516167	4.11526	2.04099	0.0990111	0.999997	592	sine oculis-related homeobox 1	20471	20471	Six1
ENSMUSG00000037736	5.20256	19.8877	0.299053	12.6373	-3.22807	-1.69067	0.0434539	0.999997	593	LIM and calponin homology domains 1	77569	77569	Limch1
ENSMUSG00000083140	1.44931	0.302903	0.81497	0.403726	5.11774	2.35551	0.126391	0.999997	594	predicted pseudogene 5073	NA		Gm5073
ENSMUSG00000106702	0.970906	0.269875	0.986644	0.467438	4.27621	2.09633	0.106677	0.999997	595	predicted gene 42846	NA		Gm42846
ENSMUSG00000077202	1.54473	6.25556	0.188955	2.55778	-3.24958	-1.70025	0.0472493	0.999997	596	predicted gene, 25612	NA		Gm25612
ENSMUSG00000074003	0.0533465	0.244178	0.0923989	0.265124	-5.96714	-2.57704	0.140998	0.999997	597	guanylate cyclase 2d	14918	14918	Gucy2d
ENSMUSG00000022602	0.791504	0.331124	0.25719	0.336335	3.83829	1.94046	0.0891612	0.999997	598	activity regulated cytoskeletal-associated protein	11838	11838	Arc
ENSMUSG00000107658	0.150806	0.689425	0.148706	0.364292	-3.41108	-1.77023	0.0621851	0.999997	599	predicted gene 44958	NA		Gm44958
ENSMUSG00000079484	1.17864	0.394081	0.268653	0.274999	3.33147	1.73616	0.0553831	0.999997	600	phytanoyl-CoA dioxygenase domain containing 1	227696	227696	Phyhd1
ENSMUSG00000036578	0.60751	1.70563	0.632906	1.22512	-6.44234	-2.68758	0.147236	0.999997	601	FXYD domain-containing ion transport regulator 7	57780	57780	Fxyd7
ENSMUSG00000091243	25.607	10.9372	20.2571	12.0403	3.79808	1.92527	0.088023	0.999997	602	vestigial like family member 3	73569	73569	Vgll3
ENSMUSG00000022952	5.84401	2.54287	2.84909	2.5679	3.65112	1.86834	0.0823455	0.999997	603	runt related transcription factor 1	12394	12394	Runx1
ENSMUSG00000100707	0.582629	0.119822	0.362193	0.114631	3.79078	1.92249	0.0884475	0.999997	604	predicted gene 28523	NA		Gm28523
ENSMUSG00000039115	17.1365	63.3751	6.98956	46.5019	-3.20092	-1.67849	0.0445371	0.999997	605	integrin alpha 9	104099	104099	Itga9
ENSMUSG00000110795	0.906157	0.304039	0.149145	0.231096	3.49285	1.80441	0.0710801	0.999997	606		NA		CAAA01216754.1
ENSMUSG00000094344	1.19263	0.233662	0.595768	0.404715	3.46341	1.79219	0.0692655	0.999997	607	predicted gene 11942	NA		Gm11942
ENSMUSG00000042845	0.888495	3.99967	0.746249	2.72389	-5.231	-2.38709	0.132565	0.999997	608	WAP four-disulfide core domain 12	192200	192200	Wfdc12
ENSMUSG00000041782	0.370634	0.096763	0.210607	0.0921994	4.17684	2.06241	0.107301	0.999997	609	ladinin	16763	16763	Lad1
ENSMUSG00000006731	4.91243	1.9243	3.11376	1.41729	3.44609	1.78496	0.0699662	0.999997	610	beta-1,4-N-acetyl-galactosaminyl transferase 1	14421	14421	B4galnt1
ENSMUSG00000027009	13.6465	2.38048	9.43746	1.10916	5.04004	2.33344	0.130314	0.999997	611	integrin alpha 4	16401	16401	Itga4
ENSMUSG00000040562	11.1882	3.03977	6.21051	1.95941	3.82034	1.9337	0.0934423	0.999997	612	glutathione S-transferase, mu 2	14863	14863	Gstm2
ENSMUSG00000029484	262.315	49.5029	205.389	46.2879	5.45363	2.44722	0.13904	0.999997	613	annexin A3	11745	11745	Anxa3
ENSMUSG00000019850	21.8717	4.1393	17.0298	1.34527	4.52002	2.17633	0.117812	0.999997	614	tumor necrosis factor, alpha-induced protein 3	21929	21929	Tnfaip3
ENSMUSG00000051212	0.542627	5.36646	0.883409	8.53011	-15.7065	-3.97329	0.173851	0.999997	615	G protein-coupled receptor 183	321019	321019	Gpr183
ENSMUSG00000105858	0.209096	1.192	0.182123	0.768254	-3.65016	-1.86796	0.0854801	0.999997	616	RIKEN cDNA 2310074N15 gene	NA		2310074N15Rik
ENSMUSG00000110350	3.19065	1.17275	2.25592	1.25767	4.81886	2.26869	0.126822	0.999997	617	predicted gene 10252	NA		Gm10252
ENSMUSG00000085261	0.0237057	0.256805	0.0410595	0.291678	-5.97878	-2.57985	0.14672	0.999997	618	predicted gene 13814	NA		Gm13814
ENSMUSG00000026442	0.120054	0.0384851	0.0634621	0.0227845	3.25849	1.7042	0.054904	0.999997	619	neurofascin	269116	269116	Nfasc
ENSMUSG00000031075	35.1825	3.70735	27.6771	2.77832	7.74785	2.9538	0.158643	0.999997	620	anoctamin 1, calcium activated chloride channel	101772	101772	Ano1
ENSMUSG00000024778	5.33426	1.92947	3.26675	1.30044	3.59018	1.84405	0.0830271	0.999997	621	Fas (TNF receptor superfamily member 6)	14102	14102	Fas
ENSMUSG00000110787	4.64712	1.17824	3.6898	1.8582	6.84018	2.77403	0.155457	0.999997	622		NA		AC157021.1
ENSMUSG00000029375	0.295178	0	0.511263	0	4.98926	2.31882	0.130934	0.999997	623	chemokine (C-X-C motif) ligand 15	20309	20309	Cxcl15
ENSMUSG00000026676	62.9542	125.6	100.729	88.1752	-7.64831	-2.93514	0.159159	0.999997	624	coiled-coil domain containing 3	74186	74186	Ccdc3
ENSMUSG00000026435	140.265	496.239	164.237	154.058	-6.51929	-2.70471	0.1541	0.999997	625	solute carrier family 45, member 3	212980	212980	Slc45a3
ENSMUSG00000034336	0.148154	0.0428136	0.146356	0.0741553	4.16959	2.05991	0.109724	0.999997	626	internexin neuronal intermediate filament protein, alpha	226180	226180	Ina
ENSMUSG00000082196	0.264502	1.03003	0.14709	0.371579	-3.80548	-1.92808	0.095509	0.999997	627	predicted gene 14231	NA		Gm14231
ENSMUSG00000102935	0.187853	0.684666	0.212276	0.508245	-3.6017	-1.84868	0.0853212	0.999997	628	predicted gene, 38355	NA		Gm38355
ENSMUSG00000024529	16.4306	3.30938	20.2012	3.7388	8.85009	3.14569	0.165611	0.999997	629	lysyl oxidase	16948	16948	Lox
ENSMUSG00000025964	0.161396	0.09938	0.0911109	0.119792	5.31887	2.41112	0.138897	0.999997	630	a disintegrin and metallopeptidase domain 23	23792	23792	Adam23
ENSMUSG00000074345	11.1815	28.8679	12.4209	7.6486	-4.21251	-2.07468	0.112446	0.999997	631	tumor necrosis factor, alpha-induced protein 8-like 3	244882	244882	Tnfaip8l3
ENSMUSG00000102179	0.214515	0.470549	0.302156	0.168546	-3.80638	-1.92842	0.0963974	0.999997	632	predicted gene, 37868	NA		Gm37868
ENSMUSG00000091021	1.69774	0.588386	0.517672	0.349669	3.28034	1.71384	0.061687	0.999997	633	predicted gene, 17300	NA		Gm17300
ENSMUSG00000074923	0.387124	0.119936	0.044459	0.0712704	3.41255	1.77085	0.0728722	0.999997	634	p21 protein (Cdc42/Rac)-activated kinase 6	214230	214230	Pak6
ENSMUSG00000019966	26.7021	5.48601	15.7509	1.286	4.45666	2.15596	0.12071	0.999997	635	kit ligand	17311	17311	Kitl
ENSMUSG00000108801	1.31873	0.324374	0.818502	0.215494	4.12228	2.04344	0.109591	0.999997	636	predicted gene 44514	NA		Gm44514
ENSMUSG00000020388	5.6356	21.6623	2.33058	12.3111	-3.39877	-1.76501	0.0718667	0.999997	637	PDZ and LIM domain 4	30794	30794	Pdlim4
ENSMUSG00000037440	2.00666	0.296147	2.45358	0.05055	4.64493	2.21566	0.126322	0.999997	638	vanin 1	22361	22361	Vnn1
ENSMUSG00000086704	0.598758	0.171676	0.390763	0.175094	4.23154	2.08118	0.114366	0.999997	639	predicted gene 14582	NA		Gm14582
ENSMUSG00000068227	0.411178	0.037958	0.541501	0.0355438	4.90988	2.29569	0.131752	0.999997	640	interleukin 2 receptor, beta chain	16185	16185	Il2rb
ENSMUSG00000057315	7.81891	3.29401	5.2364	4.65821	5.49913	2.4592	0.144398	0.999997	641	Rho GTPase activating protein 24	231532	231532	Arhgap24
ENSMUSG00000022987	0.239839	0.0420834	0.292611	0.0503225	4.84299	2.2759	0.130812	0.999997	642	zinc finger protein 641	239652	239652	Zfp641
ENSMUSG00000040165	0.511549	0.0731195	0.411413	0.0643453	3.90652	1.96588	0.102963	0.999997	643	CD209c antigen	170776	170776	Cd209c
ENSMUSG00000085327	4.20041	44.2379	3.95366	54.3303	-6.2272	-2.63858	0.153943	0.999997	644	predicted gene 16104	NA		Gm16104
ENSMUSG00000046159	2.38668	0.974829	0.900765	0.909111	3.56794	1.83509	0.0859341	0.999997	645	cholinergic receptor, muscarinic 3, cardiac	12671	12671	Chrm3
ENSMUSG00000043822	3.83732	1.22381	3.94379	1.36174	5.42287	2.43906	0.143203	0.999997	646	ADAMTS-like 5	66548	66548	Adamtsl5
ENSMUSG00000104653	0.783257	0	1.35664	0	4.8441	2.27623	0.132112	0.999997	647	predicted gene 43109	NA		Gm43109
ENSMUSG00000027913	23.9045	2.59227	33.8041	3.11131	14.0052	3.8079	0.177715	0.999997	648	cysteine-rich C-terminal 1	74175	74175	Crct1
ENSMUSG00000031343	0.118286	0	0.163965	0	5.43293	2.44173	0.144609	0.999997	649	gamma-aminobutyric acid (GABA) A receptor, subunit alpha 3	14396	14396	Gabra3
ENSMUSG00000072591	0.890304	3.49732	0.632402	1.33139	-3.52041	-1.81575	0.0850972	0.999997	650	RIKEN cDNA 5930412G12 gene	NA		5930412G12Rik
ENSMUSG00000107909	0.378726	1.50712	0.334855	0.437478	-3.52841	-1.81902	0.0853465	0.999997	651	predicted gene, 44143	NA		Gm44143
ENSMUSG00000056220	10.0731	3.97442	2.74882	3.02341	3.12122	1.64211	0.0495189	0.999997	652	phospholipase A2, group IVA (cytosolic, calcium-dependent)	18783	18783	Pla2g4a
ENSMUSG00000024371	1.94686	6.52932	2.15483	5.07008	-4.28474	-2.09921	0.119654	0.999997	653	complement component 2 (within H-2S)	12263	12263	C2
ENSMUSG00000036298	10.7398	29.3127	8.40891	4.37912	-3.27733	-1.71252	0.0660656	0.999997	654	solute carrier family 2 (facilitated glucose transporter), member 13	239606	239606	Slc2a13
ENSMUSG00000020193	0.153595	0.538413	0.0618607	0.0967144	-2.95419	-1.56276	0.0240844	0.999997	655	zona pellucida binding protein	53604	53604	Zpbp
ENSMUSG00000020447	0.114114	0.00902322	0.129946	0.0156287	4.1676	2.05922	0.115012	0.999997	656	NPC1-like 1	237636	237636	Npc1l1
ENSMUSG00000100130	0.313149	0.116357	0.176025	0.169451	4.1045	2.0372	0.112988	0.999997	657	predicted gene 28379	NA		Gm28379
ENSMUSG00000019876	0.216648	0.748279	0.192182	0.524587	-3.59275	-1.84509	0.0890835	0.999997	658	protein kinase inhibitor beta, cAMP dependent, testis specific	18768	18768	Pkib
ENSMUSG00000057604	22.5261	72.0173	14.9675	17.6531	-3.45353	-1.78807	0.0820261	0.999997	659	LIM and cysteine-rich domains 1	30937	30937	Lmcd1
ENSMUSG00000027966	1.04579	0.458441	0.614841	0.470232	3.48784	1.80233	0.0847686	0.999997	660	collagen, type XI, alpha 1	12814	12814	Col11a1
ENSMUSG00000046634	0.695859	1.81777	0.762148	0.807904	-4.04631	-2.01661	0.110357	0.999997	661	polycystic kidney disease 1 like 1	171395	171395	Pkd1l1
ENSMUSG00000045871	0.944712	0.602167	0.857574	0.925411	6.65518	2.73448	0.161385	0.999997	662	SLIT and NTRK-like family, member 6	239250	239250	Slitrk6
ENSMUSG00000022296	15.715	5.90537	3.76538	3.5092	3.22113	1.68756	0.0624445	0.999997	663	brain and acute leukemia, cytoplasmic	NA		Baalc
ENSMUSG00000018920	46.0047	10.9368	29.6102	6.62055	4.3103	2.10779	0.12167	0.999997	664	chemokine (C-X-C motif) ligand 16	66102	66102	Cxcl16
ENSMUSG00000047907	19.2213	53.3749	19.506	34.8882	-3.66637	-1.87435	0.0957614	0.999997	665	teashirt zinc finger family member 2	228911	228911	Tshz2
ENSMUSG00000005373	0.0234776	0.101403	0.0207814	0.0354488	-3.19472	-1.67569	0.060675	0.999997	666	MLX interacting protein-like	58805	58805	Mlxipl
ENSMUSG00000028399	0.531764	0.152056	0.382147	0.105854	4.13366	2.04742	0.115397	0.999997	667	protein tyrosine phosphatase, receptor type, D	19266	19266	Ptprd
ENSMUSG00000073739	0.35598	0.0926754	0.0681467	0.0101856	3.07272	1.61952	0.0462387	0.999997	668	predicted gene 16287	NA		Gm16287
ENSMUSG00000055629	0.318397	1.82112	0.190526	1.81976	-4.01883	-2.00678	0.111157	0.999997	669	beta-1,4-N-acetyl-galactosaminyl transferase 4	330671	330671	B4galnt4
ENSMUSG00000042501	0.203933	0.0805427	0.119875	0.115554	5.97138	2.57807	0.155266	0.999997	670	carboxypeptidase A6	329093	329093	Cpa6
ENSMUSG00000042942	0.260311	0.102661	0.121816	0.0549595	3.08026	1.62305	0.0487762	0.999997	671	growth regulation by estrogen in breast cancer-like	381157	381157	Greb1l
ENSMUSG00000087246	0.249034	0.0381717	0.240552	0.0661153	4.94995	2.30741	0.139336	0.999997	672	predicted gene 13346	NA		Gm13346
ENSMUSG00000052698	1.42431	6.94647	1.19452	5.43464	-4.67676	-2.22551	0.132496	0.999997	673	talin 2	70549	70549	Tln2
ENSMUSG00000092035	8.86846	2.9339	7.16001	1.91977	3.73609	1.90153	0.101457	0.999997	674	paternally expressed 10	170676	170676	Peg10
ENSMUSG00000110869	0.119364	0.523357	0.00994335	0.220657	-3.20971	-1.68244	0.0638914	0.999997	675		NA		AC122901.1
ENSMUSG00000021373	1.29142	0.406862	1.01061	0.361033	8.47758	3.08365	0.174355	0.999997	676	CAP, adenylate cyclase-associated protein, 2 (yeast)	67252	67252	Cap2
ENSMUSG00000025856	64.0573	19.0834	48.5187	18.7366	4.21391	2.07516	0.120882	0.999997	677	platelet derived growth factor, alpha	18590	18590	Pdgfa
ENSMUSG00000039155	0.468796	0.128518	0.389428	0.188902	4.68548	2.2282	0.135043	0.999997	678	cadherin-like 26	381409	381409	Cdh26
ENSMUSG00000031932	0.0292531	1.49522	0.025351	2.40792	-7.36196	-2.88009	0.169774	0.999997	679	G protein-coupled receptor 83	14608	14608	Gpr83
ENSMUSG00000101603	0.278636	0.687452	0.419579	0.185612	-3.51738	-1.8145	0.0907375	0.999997	680	predicted gene 28730	NA		Gm28730
ENSMUSG00000043587	0.724299	0.172687	0.677016	0.0173367	3.79904	1.92564	0.105627	0.999997	681	2-phosphoxylose phosphatase 1	235534	235534	Pxylp1
ENSMUSG00000006586	0.338118	0.122423	0.248732	0.143339	4.42704	2.14634	0.12815	0.999997	682	runt-related transcription factor 1; translocated to, 1 (cyclin D-related)	12395	12395	Runx1t1
ENSMUSG00000097804	1.86689	0.492996	1.77135	0.145494	3.57452	1.83775	0.0951132	0.999997	683	predicted gene, 16685	NA		Gm16685
ENSMUSG00000021123	10.4158	3.03357	6.8169	2.12379	3.77113	1.915	0.105324	0.999997	684	retinol dehydrogenase 12	77974	77974	Rdh12
ENSMUSG00000106643	0.336696	0.831477	0.346183	0.485541	-3.49022	-1.80332	0.0898586	0.999997	685	predicted gene 43422	NA		Gm43422
ENSMUSG00000052087	1.25466	0.388991	0.213423	0.252012	3.15774	1.65889	0.0623362	0.999997	686	regulator of G-protein signaling 14	51791	51791	Rgs14
ENSMUSG00000000031	49.2607	895.258	63.999	1386.56	-10.5368	-3.39737	0.18296	0.999997	687	H19, imprinted maternally expressed transcript	NA		H19
ENSMUSG00000047759	0.245442	0.0556815	0.189576	0.0530554	4.13055	2.04633	0.119804	0.999997	688	heparan sulfate (glucosamine) 3-O-sulfotransferase 3A1	15478	15478	Hs3st3a1
ENSMUSG00000108594	0.451609	1.70396	0.532464	1.10912	-4.7709	-2.25426	0.139129	0.999997	689	predicted gene 44770	NA		Gm44770
ENSMUSG00000087624	0.412542	2.10265	0.49134	1.93351	-4.25402	-2.08883	0.124899	0.999997	690	RIKEN cDNA 9230111E07 gene	NA		9230111E07Rik
ENSMUSG00000048583	9.64527	57.4321	4.35317	63.2278	-4.01618	-2.00582	0.115442	0.999997	691	insulin-like growth factor 2	16002	16002	Igf2
ENSMUSG00000025489	0.449256	1.71172	0.171435	0.610692	-3.15616	-1.65817	0.0632429	0.999997	692	interferon induced transmembrane protein 5	73835	73835	Ifitm5
ENSMUSG00000040488	23.4444	157.221	17.3234	156.989	-4.89651	-2.29175	0.14108	0.999997	693	latent transforming growth factor beta binding protein 4	108075	108075	Ltbp4
ENSMUSG00000067212	24.7973	104.539	23.3574	68.9668	-4.66854	-2.22297	0.137223	0.999997	694	histocompatibility 2, T region locus 23	15040	15040	H2-T23
ENSMUSG00000074650	0.54416	0.367202	0.10767	0.600782	5.02296	2.32854	0.144969	0.999997	695	predicted gene 10735	NA		Gm10735
ENSMUSG00000044788	0.399182	0.124826	0.421499	0.112422	4.35724	2.12341	0.128426	0.999997	696	fatty acid desaturase domain family, member 6	328035	328035	Fads6
ENSMUSG00000024669	0.0720371	0.928592	0.062428	1.17713	-5.04217	-2.33404	0.14538	0.999997	697	CD5 antigen	12507	12507	Cd5
ENSMUSG00000102721	0.106185	0.451252	0.0129887	0.260979	-3.10054	-1.63252	0.0569342	0.999997	698	RIKEN cDNA A630081D01 gene	NA		A630081D01Rik
ENSMUSG00000017144	33.8164	8.64547	23.5241	8.57307	4.73583	2.24362	0.139844	0.999997	699	Rho family GTPase 3	74194	74194	Rnd3
ENSMUSG00000098557	145.886	493.879	172.172	325.746	-4.42398	-2.14534	0.130508	0.999997	700	potassium channel tetramerisation domain containing 12	239217	239217	Kctd12
ENSMUSG00000018844	13.6495	36.0712	11.9775	18.5739	-3.45401	-1.78827	0.0908795	0.999997	701	fibronectin type III domain containing 8	78919	78919	Fndc8
ENSMUSG00000025963	0.171114	0.487726	0.120315	0.284219	-3.6768	-1.87845	0.103731	0.999997	702	malate dehydrogenase 1B, NAD (soluble)	76668	76668	Mdh1b
ENSMUSG00000042377	1.04094	0.428733	0.363057	0.468349	3.73562	1.90135	0.106641	0.999997	703	family with sequence similarity 83, member G	69640	69640	Fam83g
ENSMUSG00000034981	7.7474	22.8533	9.939	20.5236	-4.53868	-2.18227	0.133864	0.999997	704	prostate androgen-regulated mucin-like protein 1	231440	231440	Parm1
ENSMUSG00000004864	8.27591	1.73368	10.8542	1.36952	4.63151	2.21148	0.138985	0.999997	705	mitogen-activated protein kinase 13	26415	26415	Mapk13
ENSMUSG00000018845	14.8398	29.9926	17.6358	19.7041	-3.95237	-1.98272	0.116356	0.999997	706	unc-45 myosin chaperone B	217012	217012	Unc45b
ENSMUSG00000108693	0.46729	1.81661	0.246156	0.849855	-3.1582	-1.6591	0.0681624	0.999997	707	predicted gene 45153	NA		Gm45153
ENSMUSG00000021061	0.0878175	0.462579	0.0654812	0.509088	-3.69874	-1.88703	0.106654	0.999997	708	spectrin beta, erythrocytic	20741	20741	Sptb
ENSMUSG00000056671	22.8723	8.22443	7.81729	3.65437	3.24238	1.69705	0.0785543	0.999997	709	PRELI domain containing 2	77619	77619	Prelid2
ENSMUSG00000058831	0.26014	0.0700128	0.147357	0.0837199	3.27249	1.71039	0.0807032	0.999997	710	opsin 1 (cone pigments), short-wave-sensitive (color blindness, tritan)	12057	12057	Opn1sw
ENSMUSG00000034881	2.54326	21.845	1.57334	22.06	-5.6463	-2.49731	0.158935	0.999997	711	thromboxane A2 receptor	21390	21390	Tbxa2r
ENSMUSG00000079414	2.25235	0.830924	1.53505	0.835617	4.06995	2.02501	0.121227	0.999997	712	predicted gene 11110	NA		Gm11110
ENSMUSG00000044216	3.84566	1.45226	2.11617	1.24408	3.64446	1.8657	0.104461	0.999997	713	potassium inwardly-rectifying channel, subfamily J, member 4	16520	16520	Kcnj4
ENSMUSG00000026365	16.7943	5.44077	10.6018	4.29609	3.72243	1.89624	0.108728	0.999997	714	complement component factor h	12628	12628	Cfh
ENSMUSG00000086468	0.642293	2.32243	0.369626	1.01499	-3.07488	-1.62053	0.0612461	0.999997	715	Ewing tumor-associated antigen 1, opposite strand	NA		Etaa1os
ENSMUSG00000021614	5.84395	2.25965	2.49278	1.03639	3.02551	1.59718	0.0549239	0.999997	716	versican	13003	13003	Vcan
ENSMUSG00000068587	0.0613438	0.0125993	0.0456203	0.0120051	3.64638	1.86646	0.105312	0.999997	717	maltase-glucoamylase	232714	232714	Mgam
ENSMUSG00000041552	8.92841	1.56353	8.07886	1.71665	5.2125	2.38197	0.153631	0.999997	718	patched domain containing 1	211612	211612	Ptchd1
ENSMUSG00000105911	4.20135	0.882629	1.29328	1.52876	3.67681	1.87845	0.106956	0.999997	719	small nucleolar RNA, H/ACA box 16A	NA		Snora16a
ENSMUSG00000109899	0.836268	0.285033	0.263168	0.493691	4.13623	2.04832	0.12636	0.999997	720	predicted gene 6012	NA		Gm6012
ENSMUSG00000036655	0.423552	0.117383	0.0482732	0.112297	3.14081	1.65114	0.0688742	0.999997	721	collectin sub-family member 11	71693	71693	Colec11
ENSMUSG00000036377	0.167319	2.92211	0.101252	4.18861	-5.51002	-2.46206	0.159813	0.999997	722	RIKEN cDNA C530008M17 gene	320827	320827	C530008M17Rik
ENSMUSG00000032224	0.471216	0.433178	0.316005	0.669997	4.74094	2.24517	0.145142	0.999997	723	family with sequence similarity 81, member A	76886	76886	Fam81a
ENSMUSG00000016918	6.47103	1.89799	7.77064	1.88498	4.55513	2.18749	0.139448	0.999997	724	sulfatase 1	240725	240725	Sulf1
ENSMUSG00000035849	0.295382	0.0810874	0.105219	0.0936945	3.31067	1.72712	0.086692	0.999997	725	keratin 222	268481	268481	Krt222
ENSMUSG00000087203	2.01515	0.417685	1.82284	0.401027	5.79659	2.53521	0.16341	0.999997	726	predicted gene 13986	NA		Gm13986
ENSMUSG00000114165	0.151213	0.509581	0.12167	0.328877	-3.37668	-1.75561	0.0909696	0.999997	727		NA		AC158990.2
ENSMUSG00000004266	0.513272	2.55008	0.367923	2.55446	-3.81066	-1.93004	0.114047	0.999997	728	protein tyrosine phosphatase, non-receptor type 6	15170	15170	Ptpn6
ENSMUSG00000042985	0.131488	0	0.182266	0	5.43293	2.44173	0.157758	0.999997	729	uroplakin 3B	100647	100647	Upk3b
ENSMUSG00000058794	0.521254	1.5944	0.442842	0.780874	-3.42419	-1.77576	0.0952598	0.999997	730	nuclear factor, erythroid derived 2	18022	18022	Nfe2
ENSMUSG00000020467	17.0677	4.4209	19.6124	3.8068	4.82586	2.27079	0.148352	0.999997	731	epidermal growth factor-containing fibulin-like extracellular matrix protein 1	216616	216616	Efemp1
ENSMUSG00000028654	2.07768	0.420331	1.72711	0.352038	5.22255	2.38475	0.155304	0.999997	732	v-myc avian myelocytomatosis viral oncogene lung carcinoma derived	16918	16918	Mycl
ENSMUSG00000107736	0.555731	2.81634	0.173004	1.92251	-3.75273	-1.90794	0.113435	0.999997	733	predicted gene, 44148	NA		Gm44148
ENSMUSG00000062826	0.164116	0.030451	0.0317953	0.0265933	4.20576	2.07237	0.130582	0.999997	734	carboxylesterase 2F	71903	71903	Ces2f
ENSMUSG00000030699	1.56125	0.408669	1.22952	0.345394	3.68594	1.88203	0.110394	0.999997	735	T-box 6	21389	21389	Tbx6
ENSMUSG00000040026	1.35594	0.493832	0.95531	0.449243	4.17266	2.06097	0.130345	0.999997	736	serum amyloid A 3	20210	20210	Saa3
ENSMUSG00000108802	0.801591	1.76917	1.20005	1.80782	-4.7782	-2.25647	0.148792	0.999997	737	predicted gene 44769	NA		Gm44769
ENSMUSG00000055653	0.12069	0.0257836	0.0456775	0.0446586	3.343	1.74114	0.0928764	0.999997	738	glypican 3	14734	14734	Gpc3
ENSMUSG00000061531	0.257083	0.0520028	0.127289	0.0497496	4.13013	2.04619	0.129769	0.999997	739	transmembrane protein 236	625286	625286	Tmem236
ENSMUSG00000020905	0.312621	0.0438512	0.37024	0.0759525	6.35369	2.6676	0.175262	0.999997	740	ubiquitin specific peptidase 43	216835	216835	Usp43
ENSMUSG00000022076	0.231653	0.0326939	0.28783	0.0283502	4.80048	2.26318	0.150327	0.999997	741	kelch-like 1	93688	93688	Klhl1
ENSMUSG00000101517	0.772509	0.222074	0.440346	0.139374	3.71362	1.89282	0.113499	0.999997	742	RIKEN cDNA 4732465J04 gene	NA		4732465J04Rik
ENSMUSG00000063239	0.0321982	0.267602	0.0557689	0.315242	-4.05662	-2.02028	0.127112	0.999997	743	glutamate receptor, metabotropic 4	268934	268934	Grm4
ENSMUSG00000024679	41.4626	21.9574	6.79051	22.9571	3.82998	1.93734	0.118568	0.999997	744	membrane-spanning 4-domains, subfamily A, member 6D	68774	68774	Ms4a6d
ENSMUSG00000033898	0.352516	0.0775848	0.209303	0.0677557	3.48405	1.80077	0.102227	0.999997	745	complement factor H-related 2	545366	545366	Cfhr2
ENSMUSG00000048794	0.131173	0.0504789	0.0699524	0.087432	4.07123	2.02547	0.12754	0.999997	746	cilia and flagella associated protein 100	243538	243538	Cfap100
ENSMUSG00000057058	0.118999	0.0162048	0.0780857	0.0280675	4.48617	2.16548	0.141108	0.999997	747	src family associated phosphoprotein 1	78473	78473	Skap1
ENSMUSG00000031230	1.8167	0.598051	0.42506	0.505558	3.41251	1.77083	0.0978955	0.999997	748	fibroblast growth factor 16	80903	80903	Fgf16
ENSMUSG00000031995	2.33068	0.883072	0.790064	0.564597	3.21356	1.68417	0.0844589	0.999997	749	suppression of tumorigenicity 14 (colon carcinoma)	19143	19143	St14
ENSMUSG00000057246	0.0750288	0.371284	0.0854386	0.256784	-3.54039	-1.82391	0.105687	0.999997	750	cDNA sequence BC051142	407788	407788	BC051142
ENSMUSG00000006522	0.126434	0.69027	0.156048	0.806119	-4.56176	-2.18959	0.144762	0.999997	751	inter-alpha trypsin inhibitor, heavy chain 3	16426	16426	Itih3
ENSMUSG00000091034	1.07541	2.04641	1.03398	1.8475	-4.95095	-2.3077	0.154673	0.999997	752	predicted gene, 17660	100271704	100271704	Gm17660
ENSMUSG00000026443	0.37447	2.33872	0.25581	2.93851	-3.92626	-1.97316	0.124571	0.999997	753	leucine rich repeat protein 2, neuronal	16980	16980	Lrrn2
ENSMUSG00000001247	9.4918	23.3439	13.5093	20.1861	-6.59997	-2.72246	0.180376	0.999997	754	lipolysis stimulated lipoprotein receptor	54135	54135	Lsr
ENSMUSG00000029553	3.98503	0.507477	4.13435	0.26218	5.62696	2.49235	0.168151	0.999997	755	transcription factor EC	21426	21426	Tfec
ENSMUSG00000038560	0.214149	0.625243	0.17511	0.12296	-3.29472	-1.72015	0.0927644	0.999997	756	trans-acting transcription factor 6	83395	83395	Sp6
ENSMUSG00000001942	14.0695	40.6492	12.3213	17.7323	-3.41298	-1.77103	0.100081	0.999997	757	sialic acid acetylesterase	22619	22619	Siae
ENSMUSG00000106981	1.81062	0.600809	0.876766	0.0977953	2.94843	1.55995	0.0575012	0.999997	758	predicted gene 45495	NA		Gm45495
ENSMUSG00000031557	4.38584	1.50892	3.4411	0.408888	3.22547	1.68951	0.0876282	0.999997	759	pleckstrin homology domain-containing, family A (phosphoinositide binding specific) member 2	83436	83436	Plekha2
ENSMUSG00000031189	0.352907	0.0847281	0.41351	0.0508739	3.78487	1.92024	0.120721	0.999997	760	AF4/FMR2 family, member 2	14266	14266	Aff2
ENSMUSG00000002985	56.3377	157.28	76.9842	106.992	-5.16197	-2.36792	0.160477	0.999997	761	apolipoprotein E	11816	11816	Apoe
ENSMUSG00000026994	35.538	15.7167	12.1494	14.5206	3.72369	1.89673	0.117972	0.999997	762	UDP-N-acetyl-alpha-D-galactosamine:polypeptide N-acetylgalactosaminyltransferase 3	14425	14425	Galnt3
ENSMUSG00000105419	0.220746	0.721406	0.2914	0.199482	-3.29483	-1.7202	0.0945836	0.999997	763	predicted gene 43205	NA		Gm43205
ENSMUSG00000072949	0.629355	0.215441	0.144352	0.144667	3.28031	1.71383	0.0931437	0.999997	764	acyl-CoA thioesterase 1	26897	26897	Acot1
ENSMUSG00000000305	0.0358327	0.149756	0.0317176	0.036736	-3.77588	-1.91681	0.120835	0.999997	765	cadherin 4	12561	12561	Cdh4
ENSMUSG00000075316	0.0560839	0.0211031	0.0208842	0.0182994	3.55249	1.82883	0.110113	0.999997	766	sodium channel, voltage-gated, type IX, alpha	20274	20274	Scn9a
ENSMUSG00000074461	0.476436	1.61887	0.517714	0.979353	-4.65393	-2.21845	0.151975	0.999997	767	predicted gene 10699	NA		Gm10699
ENSMUSG00000114184	2.73934	0.981317	0.793073	0.621595	2.88204	1.52709	0.0535821	0.999997	768		NA		AC122367.3
ENSMUSG00000031762	106.863	44.3121	87.1903	31.7631	3.11463	1.63906	0.0801199	0.999997	769	metallothionein 2	17750	17750	Mt2
ENSMUSG00000073821	9.64288	4.84824	2.10548	4.47059	3.11289	1.63826	0.0800103	0.999997	770	RIKEN cDNA 8030451A03 gene	NA		8030451A03Rik
ENSMUSG00000015652	46.8323	22.231	15.4501	16.3018	3.00707	1.58836	0.0683599	0.999997	771	six transmembrane epithelial antigen of the prostate 1	70358	70358	Steap1
ENSMUSG00000066538	0.456685	0.129399	0.326059	0.224126	3.61513	1.85405	0.114522	0.999997	772	predicted gene 6254	NA		Gm6254
ENSMUSG00000091408	0.448166	0.740658	0.392119	0.405162	-4.56126	-2.18943	0.150156	0.999997	773	predicted gene 6728	NA		Gm6728
ENSMUSG00000020562	0.694474	1.39989	0.808689	0.345479	-3.29912	-1.72208	0.0967824	0.999997	774	EF-hand calcium binding domain 10	75040	75040	Efcab10
ENSMUSG00000020411	4.0114	1.86549	1.5067	1.33844	3.0599	1.61348	0.0755074	0.999997	775	NIPA-like domain containing 4	214112	214112	Nipal4
ENSMUSG00000026928	0.364423	0.0956517	0.0231224	0.0911405	3.76688	1.91337	0.12218	0.999997	776	caspase recruitment domain family, member 9	332579	332579	Card9
ENSMUSG00000035357	3.35568	1.14017	1.17568	0.93797	4.2327	2.08158	0.14044	0.999997	777	PDZ domain containing RING finger 3	55983	55983	Pdzrn3
ENSMUSG00000033826	0.147435	0.0507845	0.0723042	0.00823794	2.99997	1.58495	0.0688764	0.999997	778	dynein, axonemal, heavy chain 8	13417	13417	Dnah8
ENSMUSG00000099143	9.82666	98.6445	13.0676	141.958	-7.17675	-2.84333	0.189163	0.999997	779	predicted gene, 27483	NA		Gm27483
ENSMUSG00000058420	16.5169	6.93702	10.4892	4.87021	3.13975	1.65065	0.0848681	0.999997	780	synaptotagmin XVII	110058	110058	Syt17
ENSMUSG00000039145	2.29059	0.785168	1.14307	0.41164	3.36645	1.75123	0.102973	0.999997	781	calcium/calmodulin-dependent protein kinase ID	227541	227541	Camk1d
ENSMUSG00000021575	9.52249	19.3775	11.3489	9.08226	-3.61962	-1.85584	0.116111	0.999997	782	aryl-hydrocarbon receptor repressor	11624	11624	Ahrr
ENSMUSG00000053706	1.06692	0.425449	0.249771	0.230768	2.87988	1.52601	0.0559071	0.999997	783	RIKEN cDNA B430305J03 gene	NA		B430305J03Rik
ENSMUSG00000021696	6.84676	15.8222	7.94188	9.26315	-3.67739	-1.87868	0.120122	0.999997	784	ELOVL family member 7, elongation of long chain fatty acids (yeast)	74559	74559	Elovl7
ENSMUSG00000020077	10.4667	27.0323	12.4246	18.8705	-4.27666	-2.09648	0.144298	0.999997	785	serglycin	19073	19073	Srgn
ENSMUSG00000031284	11.615	4.4402	3.20692	2.71903	2.95304	1.5622	0.0653253	0.999997	786	p21 protein (Cdc42/Rac)-activated kinase 3	18481	18481	Pak3
ENSMUSG00000060240	0.478778	0.0781498	0.627956	0.13536	5.00569	2.32357	0.161915	0.999997	787	cell cycle exit and neuronal differentiation 1	57754	57754	Cend1
ENSMUSG00000050103	1.75791	3.10189	1.73905	1.70968	-3.60301	-1.8492	0.117233	0.999997	788	alkylglycerol monooxygenase	319660	319660	Agmo
ENSMUSG00000042895	0.408074	0.0787264	0.527841	0.136358	4.60648	2.20367	0.15506	0.999997	789	actin-binding Rho activating protein	223513	223513	Abra
ENSMUSG00000040498	0.947496	0.321408	0.601867	0.321812	3.93768	1.97734	0.133044	0.999997	790	immunoglobulin superfamily, member 23	70080	70080	Igsf23
ENSMUSG00000062713	0.276615	0.123298	0.109	0.1391	3.1413	1.65136	0.0878935	0.999997	791	single-minded homolog 2 (Drosophila)	20465	20465	Sim2
ENSMUSG00000032899	1.85273	0.791317	0.117274	0.492916	2.88907	1.53061	0.0622635	0.999997	792	serine/threonine/tyrosine kinase 1	243659	243659	Styk1
ENSMUSG00000050195	0.116781	0.319264	0.109241	0.204157	-3.71539	-1.89352	0.125415	0.999997	793	stearoyl-coenzyme A desaturase 4	329065	329065	Scd4
ENSMUSG00000044550	0.250513	0.0927789	0.131963	0.0884032	3.33354	1.73706	0.104474	0.999997	794	transcription elongation factor A (SII)-like 3	594844	594844	Tceal3
ENSMUSG00000106855	0.158345	0.016987	0.137131	0.0294224	4.94383	2.30563	0.16389	0.999997	795	RIKEN cDNA 5330437M03 gene	NA		5330437M03Rik
ENSMUSG00000050370	80.5047	32.4975	47.5271	21.7458	3.05084	1.60921	0.0819656	0.999997	796	cholesterol 25-hydroxylase	12642	12642	Ch25h
ENSMUSG00000006784	0.15896	0.502039	0.0572585	0.184575	-2.75479	-1.46194	0.0422667	0.999997	797	tetratricopeptide repeat domain 25	74407	74407	Ttc25
ENSMUSG00000058626	0.0800672	2.97568	0.0846277	2.59612	-9.07305	-3.18159	0.200411	0.999997	798	calpain 11	268958	268958	Capn11
ENSMUSG00000074785	0.0546988	0.0799235	0.0888864	0.0344522	-3.71005	-1.89144	0.126226	0.999997	799	plexin C1	54712	54712	Plxnc1
ENSMUSG00000030154	4.06154	5.34901	6.68425	5.54562	-5.4727	-2.45225	0.17699	0.999997	800	killer cell lectin-like receptor subfamily B member 1F	232408	232408	Klrb1f
ENSMUSG00000049001	1.04571	0.0932717	1.73856	0.0808798	8.2138	3.03805	0.198481	0.999997	801	neuron-derived neurotrophic factor	68169	68169	Ndnf
ENSMUSG00000089371	6.71497	3.17739	2.9159	4.49702	3.26343	1.70639	0.101605	0.999997	802	microRNA 1938	NA		Mir1938
ENSMUSG00000027962	55.247	4.06223	84.6983	2.8521	6.45803	2.6911	0.190085	0.999997	803	vascular cell adhesion molecule 1	22329	22329	Vcam1
ENSMUSG00000044734	1.9806	0.708333	1.13458	0.622064	3.21223	1.68357	0.0972482	0.999997	804	serine (or cysteine) peptidase inhibitor, clade B, member 1a	66222	66222	Serpinb1a
ENSMUSG00000019122	2.80376	1.05946	1.74691	0.88248	3.87376	1.95374	0.133189	0.999997	805	chemokine (C-C motif) ligand 9	20308	20308	Ccl9
ENSMUSG00000105358	0.0443976	0.174711	0.00902758	0.0319238	-3.00199	-1.58592	0.0791857	0.999997	806	predicted gene 43099	NA		Gm43099
ENSMUSG00000091133	0.967641	0.310019	0.550215	0.184851	3.08152	1.62364	0.0864767	0.999997	807	predicted gene 17108	NA		Gm17108
ENSMUSG00000085282	1.56101	0.367939	0.761866	0.117371	3.86998	1.95233	0.133152	0.999997	808	predicted gene 15663	NA		Gm15663
ENSMUSG00000086842	0.937605	0.401402	0.834667	0.424912	4.04589	2.01646	0.140032	0.999997	809	predicted gene 15681	NA		Gm15681
ENSMUSG00000002699	12.1926	2.50699	11.7306	2.7204	5.58642	2.48192	0.180878	0.999997	810	lymphocyte cytosolic protein 2	16822	16822	Lcp2
ENSMUSG00000033213	328.083	123.149	99.6284	85.4766	3.54083	1.82409	0.119783	0.999997	811	expressed sequence AA467197	433470	433470	AA467197
ENSMUSG00000003355	44.7786	19.1786	29.9452	10.3925	2.94005	1.55584	0.0719617	0.999997	812	FK506 binding protein 11	66120	66120	Fkbp11
ENSMUSG00000039481	0.854798	3.02289	0.412714	1.38277	-2.86851	-1.5203	0.0633351	0.999997	813	neurturin	18188	18188	Nrtn
ENSMUSG00000005124	38.4565	5.91723	29.1857	4.44915	6.33657	2.6637	0.190505	0.999997	814	WNT1 inducible signaling pathway protein 1	22402	22402	Wisp1
ENSMUSG00000042751	2.07252	0.668791	1.29185	0.3221	3.01569	1.59249	0.0831687	0.999997	815	nicotinamide nucleotide adenylyltransferase 2	226518	226518	Nmnat2
ENSMUSG00000054003	0.00351349	0.116882	0.00608555	0.150045	-4.3077	-2.10692	0.15282	0.999997	816	tudor domain containing 9	74691	74691	Tdrd9
ENSMUSG00000105136	1.30034	3.21711	1.11691	2.36699	-3.8868	-1.95858	0.136681	0.999997	817	RIKEN cDNA 8030487O14 gene	NA		8030487O14Rik
ENSMUSG00000113448	0.495457	1.85297	0.858157	0.211548	-3.26262	-1.70603	0.103541	0.999997	818		NA		CT030166.4
ENSMUSG00000037605	5.0786	2.2268	2.94658	2.71229	4.09339	2.0333	0.144309	0.999997	819	adhesion G protein-coupled receptor L3	319387	319387	Adgrl3
ENSMUSG00000021086	0.138332	0.0153725	0.0558884	0.026626	3.66028	1.87195	0.126271	0.999997	820	coiled-coil domain containing 175	73936	73936	Ccdc175
ENSMUSG00000085020	0.781316	3.18658	0.728363	2.16197	-3.89815	-1.96279	0.137415	0.999997	821	RIKEN cDNA 2310081O03 gene	NA		2310081O03Rik
ENSMUSG00000045730	12.5349	37.8083	5.29263	22.1064	-3.06659	-1.61664	0.0867489	0.999997	822	adrenergic receptor, beta 2	11555	11555	Adrb2
ENSMUSG00000027298	6.25673	3.01856	3.67165	3.12919	3.67113	1.87622	0.127318	0.999997	823	TYRO3 protein tyrosine kinase 3	22174	22174	Tyro3
ENSMUSG00000034997	29.4314	74.797	24.1416	18.6302	-3.07936	-1.62263	0.0883561	0.999997	824	5-hydroxytryptamine (serotonin) receptor 2A	15558	15558	Htr2a
ENSMUSG00000089525	2.29029	0.159947	1.98381	0.277037	4.2588	2.09045	0.15196	0.999997	825	predicted gene, 23833	NA		Gm23833
ENSMUSG00000026894	0.310906	1.74516	0.306577	1.39893	-4.3639	-2.12562	0.154592	0.999997	826	MORN repeat containing 5	75495	75495	Morn5
ENSMUSG00000029322	10.3132	1.79342	10.7335	1.51826	6.67666	2.73913	0.195111	0.999997	827	placenta-specific 8	231507	231507	Plac8
ENSMUSG00000109814	0.90509	18.3834	0.623062	28.5018	-6.5604	-2.71378	0.194427	0.999997	828	predicted gene 45847	NA		Gm45847
ENSMUSG00000030109	0.862467	2.02954	1.36632	1.59417	-6.20677	-2.63384	0.190406	0.999997	829	solute carrier family 6 (neurotransmitter transporter, betaine/GABA), member 12	14411	14411	Slc6a12
ENSMUSG00000033016	41.3111	147.78	22.523	102.971	-3.21048	-1.68279	0.101	0.999997	830	nuclear factor of activated T cells, cytoplasmic, calcineurin dependent 1	18018	18018	Nfatc1
ENSMUSG00000068323	0.0289577	0.135122	0.0257252	0.0878541	-3.17655	-1.66746	0.098452	0.999997	831	solute carrier family 4, sodium bicarbonate cotransporter, member 5	232156	232156	Slc4a5
ENSMUSG00000060795	0.964418	0.342955	0.304885	0.410099	3.03942	1.6038	0.0866022	0.999997	832	predicted gene 13363	NA		Gm13363
ENSMUSG00000027401	0.189236	0.0548085	0.0864643	0.058832	3.32584	1.73372	0.109924	0.999997	833	transglutaminase 3, E polypeptide	21818	21818	Tgm3
ENSMUSG00000029061	1.78474	0.516694	1.71287	0.226058	3.26197	1.70574	0.105806	0.999997	834	matrix metallopeptidase 23	26561	26561	Mmp23
ENSMUSG00000059900	16.6444	5.91836	7.59565	1.46007	3.0177	1.59345	0.0858207	0.999997	835	transmembrane protein 40	94346	94346	Tmem40
ENSMUSG00000097451	1.9745	0.66782	1.94431	0.503531	4.08427	2.03008	0.146352	0.999997	836	RNA imprinted and accumulated in nucleus	NA		Rian
ENSMUSG00000031428	0.528194	2.80461	0.463836	3.32773	-3.97637	-1.99145	0.142445	0.999997	837	zinc finger, CCHC domain containing 18	66995	66995	Zcchc18
ENSMUSG00000073902	9.35393	21.5272	10.7787	8.07574	-4.65599	-2.21909	0.1647	0.999997	838	predicted gene 1966	NA		Gm1966
ENSMUSG00000078350	1.02314	0.33417	0.76625	0.142968	3.183	1.67039	0.101993	0.999997	839	small integral membrane protein 1	68859	68859	Smim1
ENSMUSG00000044676	0.2426	0.0607103	0.248119	0.0538308	3.96709	1.98808	0.143363	0.999997	840	zinc finger protein 612	234725	234725	Zfp612
ENSMUSG00000056032	0.084839	0.0119551	0.117602	0.0207068	3.85418	1.94642	0.139343	0.999997	841	cDNA sequence BC018473	NA		BC018473
ENSMUSG00000063727	0.742034	0.265128	0.39576	0.258691	5.45683	2.44806	0.18444	0.999997	842	tumor necrosis factor receptor superfamily, member 11b (osteoprotegerin)	18383	18383	Tnfrsf11b
ENSMUSG00000027408	1.9287	0.828494	0.67557	0.543016	2.79494	1.48282	0.0605543	0.999997	843	carboxypeptidase X 1 (M14 family)	56264	56264	Cpxm1
ENSMUSG00000110752	15.872	4.7011	10.7104	3.51326	3.68314	1.88094	0.131924	0.999997	844		NA		AC133192.1
ENSMUSG00000010175	197.762	687.001	188.672	420.746	-4.21058	-2.07402	0.153864	0.999997	845	prospero homeobox 1	19130	19130	Prox1
ENSMUSG00000106519	1.71836	0.720299	1.3034	1.10313	5.68068	2.50606	0.188474	0.999997	846	predicted gene, 38509	NA		Gm38509
ENSMUSG00000052852	21.3062	70.4337	25.1526	57.9097	-5.04948	-2.33614	0.176756	0.999997	847	receptor accessory protein 1	52250	52250	Reep1
ENSMUSG00000110100	0.501834	3.23545	0.434894	3.22658	-4.09935	-2.03539	0.150106	0.999997	848	predicted gene 45261	NA		Gm45261
ENSMUSG00000048826	0.132134	1.28418	0.119838	1.6242	-5.29843	-2.40556	0.181122	0.999997	849	dishevelled-binding antagonist of beta-catenin 2	240025	240025	Dact2
ENSMUSG00000032243	0.769372	0.408758	0.538872	0.49959	4.68528	2.22814	0.168954	0.999997	850	integrin alpha 11	319480	319480	Itga11
ENSMUSG00000021062	13.0833	2.5264	10.6814	1.24908	4.62198	2.20851	0.166111	0.999997	851	RAB15, member RAS oncogene family	104886	104886	Rab15
ENSMUSG00000026817	142.974	58.5751	29.8033	35.4496	2.94733	1.55941	0.0829829	0.999997	852	adenylate kinase 1	11636	11636	Ak1
ENSMUSG00000018387	1.93454	0.774959	0.317484	0.440163	2.90945	1.54075	0.0778122	0.999997	853	shroom family member 1	71774	71774	Shroom1
ENSMUSG00000026447	0.26328	1.00125	0.0694793	0.717937	-2.87948	-1.52581	0.0754129	0.999997	854	phosphoinositide-3-kinase, class 2, beta polypeptide	240752	240752	Pik3c2b
ENSMUSG00000100764	0.898381	0.239443	0.448778	0.22815	2.98335	1.57694	0.0856413	0.999997	855	predicted gene 29155	NA		Gm29155
ENSMUSG00000034917	0.0872028	0.821475	0.0604274	1.16465	-4.23651	-2.08288	0.156204	0.999997	856	tight junction protein 3	27375	27375	Tjp3
ENSMUSG00000103473	0.619747	0.204969	0.327436	0.0417144	2.85855	1.51528	0.0709409	0.999997	857	predicted gene, 37696	NA		Gm37696
ENSMUSG00000105750	0.456974	1.6506	0.0649515	0.654611	-3.1623	-1.66097	0.102829	0.999997	858	predicted gene 43130	NA		Gm43130
ENSMUSG00000057378	0.14752	1.53728	0.102816	2.19671	-4.54078	-2.18294	0.164457	0.999997	859	ryanodine receptor 3	20192	20192	Ryr3
ENSMUSG00000019768	0.372558	1.69288	0.238443	1.68781	-3.51503	-1.81354	0.125577	0.999997	860	estrogen receptor 1 (alpha)	13982	13982	Esr1
ENSMUSG00000031224	0.234665	0.820156	0.208391	0.543182	-3.48507	-1.80119	0.124523	0.999997	861	melanoma antigen, family E, 2	272790	272790	Magee2
ENSMUSG00000029819	136.56	659.476	133.4	487.224	-6.19916	-2.63207	0.195758	0.999997	862	neuropeptide Y	109648	109648	Npy
ENSMUSG00000087596	0.77114	0.0997957	0.787637	0.172851	3.68811	1.88288	0.135217	0.999997	863	predicted gene 11715	NA		Gm11715
ENSMUSG00000105356	2.26653	0.485151	1.995	0.446052	4.63284	2.2119	0.169473	0.999997	864	predicted gene 42603	NA		Gm42603
ENSMUSG00000048078	0.0164997	0.0802955	0.011592	0.0464064	-3.10453	-1.63437	0.0983223	0.999997	865	teneurin transmembrane protein 4	23966	23966	Tenm4
ENSMUSG00000017978	1.60655	6.78752	1.14954	4.12221	-3.73053	-1.89938	0.137598	0.999997	866	Ca2+-dependent activator protein for secretion 2	320405	320405	Cadps2
ENSMUSG00000087305	0.151243	0.481524	0.0956223	0.296658	-3.27304	-1.71063	0.111724	0.999997	867	RIKEN cDNA A430035B10 gene	NA		A430035B10Rik
ENSMUSG00000039114	41.0369	13.3131	47.7318	10.7079	4.00518	2.00187	0.148867	0.999997	868	neuritin 1	68404	68404	Nrn1
ENSMUSG00000046694	9.59328	2.71002	8.7566	2.68452	3.8611	1.94901	0.142434	0.999997	869	family with sequence similarity 46, member B	100342	100342	Fam46b
ENSMUSG00000041272	2.27987	4.94881	1.05462	1.33078	-2.73762	-1.45292	0.0566998	0.999997	870	thymocyte selection-associated high mobility group box	252838	252838	Tox
ENSMUSG00000045414	45.2086	111.775	37.3655	30.0947	-2.94476	-1.55815	0.0853235	0.999997	871	RIKEN cDNA 1190002N15 gene	68861	68861	1190002N15Rik
ENSMUSG00000096972	0.946067	1.43183	1.32962	0.711562	-3.54365	-1.82523	0.129367	0.999997	872	predicted gene, 26883	NA		Gm26883
ENSMUSG00000071001	2.055	0.103286	2.50224	0.0902009	7.28604	2.86514	0.204046	0.999997	873	histidine rich carboxyl terminus 1	100039781	100039781	Hrct1
ENSMUSG00000050808	0.134277	0.0183262	0.122485	0.0317419	4.13449	2.04771	0.154936	0.999997	874	mucin 15	269328	269328	Muc15
ENSMUSG00000102123	1.55909	1.10311	0.364313	1.50932	3.22893	1.69106	0.110174	0.999997	875	predicted gene 4319	NA		Gm4319
ENSMUSG00000097840	1.10929	0.40742	0.98595	0.572094	4.20308	2.07145	0.157346	0.999997	876	predicted gene, 26756	NA		Gm26756
ENSMUSG00000082936	5.02001	8.60277	7.45517	7.29988	-4.14208	-2.05035	0.155487	0.999997	877	predicted gene 16166	NA		Gm16166
ENSMUSG00000105776	0.73955	0.202598	0.442417	0.0354957	3.11883	1.641	0.102346	0.999997	878	predicted gene 43292	NA		Gm43292
ENSMUSG00000024899	6.26833	0.790559	5.76405	0.50948	6.29932	2.6552	0.199352	0.999997	879	3-phosphoadenosine 5-phosphosulfate synthase 2	23972	23972	Papss2
ENSMUSG00000103380	1.2561	0.508456	0.582231	0.45662	3.26996	1.70927	0.113858	0.999997	880	predicted gene, 37756	NA		Gm37756
ENSMUSG00000047428	0.232817	0.0519	0.0370021	0.0494523	3.22345	1.68861	0.11059	0.999997	881	delta-like 2 homolog (Drosophila)	106565	106565	Dlk2
ENSMUSG00000033377	42.7271	5.33767	48.4212	8.1697	11.4879	3.52205	0.217458	0.999997	882	palmdelphin	114301	114301	Palmd
ENSMUSG00000021214	8.38087	0.807261	13.6278	0.945182	6.68775	2.74152	0.202703	0.999997	883	aldo-keto reductase family 1, member C18	105349	105349	Akr1c18
ENSMUSG00000085976	2.8991	7.0393	2.00082	2.35324	-2.86549	-1.51878	0.0787073	0.999997	884	predicted gene 13816	NA		Gm13816
ENSMUSG00000039278	1.22281	0.441324	0.579467	0.293983	3.16462	1.66203	0.106921	0.999997	885	proprotein convertase subtilisin/kexin type 1 inhibitor	30052	30052	Pcsk1n
ENSMUSG00000068748	0.155335	0.050922	0.0846185	0.0226559	3.00151	1.58569	0.0936622	0.999997	886	protein tyrosine phosphatase, receptor type Z, polypeptide 1	19283	19283	Ptprz1
ENSMUSG00000021187	123.071	340.56	36.2592	141.729	-2.55802	-1.35503	0.024658	0.999997	887	tandem C2 domains, nuclear	74413	74413	Tc2n
ENSMUSG00000026536	6.61581	3.47949	4.4931	4.68494	4.7892	2.25979	0.177044	0.999997	888	interferon activated gene 211	381308	381308	Ifi211
ENSMUSG00000070498	0.142961	0.0364097	0.109645	0.031797	3.41919	1.77366	0.125386	0.999997	889	transmembrane protein 132B	208151	208151	Tmem132b
ENSMUSG00000040856	0.128942	0.224376	0.223334	0.277292	-5.68318	-2.5067	0.1948	0.999997	890	delta-like 1 homolog (Drosophila)	13386	13386	Dlk1
ENSMUSG00000022887	4.1169	1.76293	2.40281	1.65651	3.77957	1.91822	0.144145	0.999997	891	mannan-binding lectin serine peptidase 1	17174	17174	Masp1
ENSMUSG00000048779	0.615671	0.16227	0.404086	0.224783	4.70203	2.23328	0.176884	0.999997	892	pyrimidinergic receptor P2Y, G-protein coupled, 6	233571	233571	P2ry6
ENSMUSG00000088984	0.691489	4.39157	0.853455	3.86459	-3.67113	-1.87622	0.139659	0.999997	893	predicted gene, 25604	NA		Gm25604
ENSMUSG00000057967	0.88466	0.209251	0.826587	0.278901	3.84225	1.94195	0.147482	0.999997	894	fibroblast growth factor 18	14172	14172	Fgf18
ENSMUSG00000020865	9.73341	4.5384	1.92152	3.49006	3.2992	1.72211	0.119205	0.999997	895	ATP-binding cassette, sub-family C (CFTR/MRP), member 3	76408	76408	Abcc3
ENSMUSG00000086389	2.56291	1.33179	0.558828	1.3793	3.94784	1.98106	0.152382	0.999997	896	predicted gene 15998	NA		Gm15998
ENSMUSG00000049404	2.74613	1.16115	2.00601	1.13727	3.87386	1.95377	0.149344	0.999997	897	retinoic acid receptor responder (tazarotene induced) 1	109222	109222	Rarres1
ENSMUSG00000092090	0.04477	0.133441	0.0645911	0.116461	-3.66263	-1.87288	0.13953	0.999997	898	predicted gene 3294	NA		Gm3294
ENSMUSG00000027456	54.2341	16.7244	39.4403	15.8402	3.92996	1.97451	0.151937	0.999997	899	syndecan binding protein (syntenin) 2	228765	228765	Sdcbp2
ENSMUSG00000098165	1.57048	0.746302	0.419908	0.953947	3.49537	1.80545	0.130577	0.999997	900	predicted gene, 26977	NA		Gm26977
ENSMUSG00000006221	4.97387	0.63555	7.79716	0.577202	11.4002	3.51098	0.220247	0.999997	901	heat shock protein family, member 7 (cardiovascular)	29818	29818	Hspb7
ENSMUSG00000105834	0.659076	0.197901	0.351023	0.342775	3.59017	1.84405	0.135842	0.999997	902	RIKEN cDNA 4930592C13 gene	NA		4930592C13Rik
ENSMUSG00000047180	65.0796	28.036	24.4763	22.1319	3.35366	1.74574	0.124058	0.999997	903	neuralized E3 ubiquitin protein ligase 3	214854	214854	Neurl3
ENSMUSG00000083953	1.68844	0.556751	0.868029	0.369571	2.99988	1.5849	0.0960432	0.999997	904	predicted gene 14049	NA		Gm14049
ENSMUSG00000097859	0.0428624	0.414898	0.0742399	0.551286	-3.83725	-1.94007	0.148771	0.999997	905	predicted gene, 26601	NA		Gm26601
ENSMUSG00000078606	1.47062	0.816146	0.598063	0.903775	4.41936	2.14384	0.170235	0.999997	906	predicted gene 4070	100042856	100042856	Gm4070
ENSMUSG00000113905	0.236566	0.585136	0.155202	0.320458	-3.12465	-1.6437	0.108156	0.999997	907		NA		AC133934.2
ENSMUSG00000001520	0.0669985	0.398859	0.0211805	0.339024	-3.8536	-1.94621	0.150566	0.999997	908	nuclear receptor interacting protein 2	60345	60345	Nrip2
ENSMUSG00000099423	0.930915	0.274849	0.471377	0.261886	3.08377	1.6247	0.104937	0.999997	909	predicted gene, 17826	NA		Gm17826
ENSMUSG00000043613	62.4223	5.65791	99.2957	2.98546	6.02444	2.59083	0.200913	0.999997	910	matrix metallopeptidase 3	17392	17392	Mmp3
ENSMUSG00000028640	1.90943	1.00087	1.53646	1.08346	3.40581	1.768	0.128466	0.999997	911	transcription factor AP-2, gamma	21420	21420	Tfap2c
ENSMUSG00000030762	0.19858	8.99281	0.208205	14.9997	-7.21312	-2.85062	0.211061	0.999997	912	aquaporin 8	11833	11833	Aqp8
ENSMUSG00000017969	13.8592	3.07861	18.6814	2.55171	5.49716	2.45869	0.196659	0.999997	913	prostaglandin I2 (prostacyclin) synthase	19223	19223	Ptgis
ENSMUSG00000085891	0.0362806	0.198803	0.0628399	0.0876628	-3.18509	-1.67133	0.114064	0.999997	914	predicted gene 14634	NA		Gm14634
ENSMUSG00000079588	1.12749	0.248816	1.03087	0.322287	5.62566	2.49202	0.198015	0.999997	915	transmembrane protein 182	381339	381339	Tmem182
ENSMUSG00000087352	13.5822	5.43081	6.92985	3.9137	3.05079	1.60918	0.103705	0.999997	916	predicted gene 12999	NA		Gm12999
ENSMUSG00000045802	0.0951249	0.185443	0.0901972	0.112861	-4.61055	-2.20494	0.178066	0.999997	917	heat shock transcription factor 3	245525	245525	Hsf3
ENSMUSG00000052125	4.85976	1.33919	3.64612	0.871716	3.57728	1.83886	0.139297	0.999997	918	RIKEN cDNA F730043M19 gene	NA		F730043M19Rik
ENSMUSG00000078907	0.350506	0.159642	0.0697625	0.225302	3.25298	1.70176	0.120244	0.999997	919	family with sequence similarity 186, member B	545136	545136	Fam186b
ENSMUSG00000042581	0.045952	0.00569863	0.0662779	0.00987031	4.26359	2.09207	0.169155	0.999997	920	thrombospondin, type I, domain containing 7B	210417	210417	Thsd7b
ENSMUSG00000039899	0.984039	106.552	1.40469	180.838	-22.3958	-4.48516	0.228597	0.999997	921	fibrinogen-like protein 2	14190	14190	Fgl2
ENSMUSG00000021567	2.13586	1.17344	1.93313	1.6796	4.94581	2.30621	0.187719	0.999997	922	naked cuticle 2 homolog (Drosophila)	72293	72293	Nkd2
ENSMUSG00000001349	2.20674	0.745553	0.994567	1.07015	7.817	2.96661	0.215246	0.999997	923	calponin 1	12797	12797	Cnn1
ENSMUSG00000027955	34.6967	11.943	13.6039	4.13989	2.97117	1.57103	0.097569	0.999997	924	family with sequence similarity 198, member B	68659	68659	Fam198b
ENSMUSG00000070780	0.158212	0.0362468	0.133965	0.0316111	4.00813	2.00293	0.158529	0.999997	925	RNA binding motif protein 47	245945	245945	Rbm47
ENSMUSG00000031786	0.515659	0.208508	0.238713	0.167141	2.91212	1.54207	0.0930538	0.999997	926	dynein regulatory complex subunit 7	330830	330830	Drc7
ENSMUSG00000064796	0.404799	1.5775	0.701133	0.680004	-3.08627	-1.62586	0.108719	0.999997	927	telomerase RNA component	NA		Terc
ENSMUSG00000031963	4.34337	2.18472	3.48441	2.5675	4.11031	2.03925	0.163126	0.999997	928	BMP-binding endothelial regulator	73230	73230	Bmper
ENSMUSG00000072720	0.257175	0.0678616	0.322296	0.0770347	4.32039	2.11116	0.173203	0.999997	929	myosin XVIIIb	74376	74376	Myo18b
ENSMUSG00000057337	0.258018	0.118553	0.153878	0.146991	3.54887	1.82736	0.139732	0.999997	930	carbohydrate (chondroitin 6/keratan) sulfotransferase 3	53374	53374	Chst3
ENSMUSG00000075585	4.7966	2.40371	3.18849	2.05708	3.18673	1.67208	0.116716	0.999997	931	RIKEN cDNA 6330403L08 gene	NA		6330403L08Rik
ENSMUSG00000017309	1.20563	25.1939	1.51848	39.5398	-10.0787	-3.33324	0.224418	0.999997	932	CD300 molecule like family member G	52685	52685	Cd300lg
ENSMUSG00000042671	1.38344	0.540219	0.820474	0.284784	3.00627	1.58798	0.10296	0.999997	933	regulator of G-protein signaling 8	67792	67792	Rgs8
ENSMUSG00000095105	0.587587	0.189923	0.313538	0.132863	3.44782	1.78569	0.133508	0.999997	934	EDAR (ectodysplasin-A receptor)-associated death domain	171211	171211	Edaradd
ENSMUSG00000019894	1.06256	0.424659	0.77389	0.166877	2.80704	1.48905	0.0829062	0.999997	935	solute carrier family 6 (neurotransmitter transporter), member 15	103098	103098	Slc6a15
ENSMUSG00000073234	1.27266	0.605404	0.543458	0.576852	3.41583	1.77223	0.132277	0.999997	936	predicted gene 8773	NA		Gm8773
ENSMUSG00000052415	1.13614	0.266615	0.963858	0.163878	3.69111	1.88405	0.148287	0.999997	937	trichohyalin	99681	99681	Tchh
ENSMUSG00000085838	0.319122	0.93079	0.346771	0.511484	-2.9639	-1.5675	0.0986899	0.999997	938	chimerin 1, opposite strand 1	NA		Chn1os1
ENSMUSG00000026475	696.251	252.49	330.595	188.418	3.30735	1.72568	0.126828	0.999997	939	regulator of G-protein signaling 16	19734	19734	Rgs16
ENSMUSG00000037010	1310.63	344.323	998.403	487.259	6.50353	2.70122	0.210174	0.999997	940	apelin	30878	30878	Apln
ENSMUSG00000092051	0.607638	2.01063	0.627776	1.64663	-3.6922	-1.88448	0.14882	0.999997	941	predicted gene 17229	NA		Gm17229
ENSMUSG00000024087	60.4276	23.7794	30.6913	10.852	2.64582	1.40372	0.0611654	0.999997	942	cytochrome P450, family 1, subfamily b, polypeptide 1	13078	13078	Cyp1b1
ENSMUSG00000043789	0.475895	0.228237	0.272236	0.209386	3.4118	1.77053	0.132849	0.999997	943	von Willebrand factor C and EGF domains	71768	71768	Vwce
ENSMUSG00000047250	14.1444	5.3066	9.90117	3.24485	3.11671	1.64002	0.113319	0.999997	944	prostaglandin-endoperoxide synthase 1	19224	19224	Ptgs1
ENSMUSG00000031125	1.7501	4.89369	1.95127	2.9462	-4.64325	-2.21513	0.184715	0.999997	945	RIKEN cDNA 3830403N18 gene	70691	70691	3830403N18Rik
ENSMUSG00000097910	0.146128	0.0286694	0.203438	0.0248029	3.98902	1.99603	0.161269	0.999997	946	RIKEN cDNA 5033428I22 gene	NA		5033428I22Rik
ENSMUSG00000108359	1.03679	0.40036	0.0967735	0.408353	3.1048	1.6345	0.11249	0.999997	947	RIKEN cDNA C430039J01 gene	NA		C430039J01Rik
ENSMUSG00000024401	1.42525	0.567201	0.531438	0.662262	3.32967	1.73538	0.129469	0.999997	948	tumor necrosis factor	21926	21926	Tnf
ENSMUSG00000069270	1.7638	0.537152	0.914063	0.19521	2.8089	1.49	0.0849838	0.999997	949	histone cluster 1, H2ac	319164	319164	Hist1h2ac
ENSMUSG00000024713	0.301481	1.0034	0.205828	0.335725	-3.39198	-1.76213	0.132694	0.999997	950	proprotein convertase subtilisin/kexin type 5	18552	18552	Pcsk5
ENSMUSG00000022479	0.41429	0.17913	0.126967	0.148516	3.09072	1.62794	0.112084	0.999997	951	vitamin D receptor	22337	22337	Vdr
ENSMUSG00000085401	0.60052	1.89807	0.5297	0.590955	-3.26596	-1.70751	0.125703	0.999997	952	solute carrier family 39 (zinc transporter), member 1, pseudogene	NA		Slc39a1-ps
ENSMUSG00000073482	0.100399	0.762715	0.173896	0.859187	-3.36787	-1.75183	0.132055	0.999997	953	predicted gene 10517	NA		Gm10517
ENSMUSG00000064125	0.144176	0.0357945	0.140137	0.00966452	3.15059	1.65562	0.116312	0.999997	954	proline rich 36	73072	73072	Prr36
ENSMUSG00000055717	0.200255	0.740933	0.13726	0.548805	-3.11587	-1.63963	0.113806	0.999997	955	SLAIN motif family, member 1	105439	105439	Slain1
ENSMUSG00000085183	10.7327	3.87371	8.57276	1.37297	2.86665	1.51937	0.0923769	0.999997	956	predicted gene 12603	NA		Gm12603
ENSMUSG00000093409	2.00656	7.29472	0.245447	2.91649	-2.92995	-1.55088	0.0984996	0.999997	957	predicted gene, 25193	NA		Gm25193
ENSMUSG00000034957	5.23131	11.5755	5.41403	1.41944	-3.34764	-1.74314	0.131179	0.999997	958	CCAAT/enhancer binding protein (C/EBP), alpha	12606	12606	Cebpa
ENSMUSG00000047959	0.517896	0.218795	0.45297	0.378964	4.49309	2.16771	0.180967	0.999997	959	potassium voltage-gated channel, shaker-related subfamily, member 3	16491	16491	Kcna3
ENSMUSG00000088490	3.94195	9.20019	5.50029	5.39244	-3.53563	-1.82197	0.142395	0.999997	960	predicted gene, 24400	NA		Gm24400
ENSMUSG00000039395	7.35979	2.13924	4.95479	1.02644	3.61343	1.85337	0.147904	0.999997	961	melanoregulin	381269	381269	Mreg
ENSMUSG00000031661	0.838982	4.63752	0.257419	4.57735	-3.50577	-1.80973	0.141125	0.999997	962	naked cuticle 1 homolog (Drosophila)	93960	93960	Nkd1
ENSMUSG00000019874	1.08648	0.254191	1.00926	0.359762	4.46634	2.15909	0.182369	0.999997	963	fatty acid binding protein 7, brain	12140	12140	Fabp7
ENSMUSG00000031626	20.2733	7.51547	6.86221	3.30321	2.85779	1.5149	0.0931195	0.999997	964	sorbin and SH3 domain containing 2	234214	234214	Sorbs2
ENSMUSG00000019102	4.14578	0.890833	6.13863	1.45634	8.22985	3.04087	0.223176	0.999997	965	aldehyde dehydrogenase family 3, subfamily A1	11670	11670	Aldh3a1
ENSMUSG00000036766	0.546556	2.88487	0.228531	3.30311	-3.24046	-1.6962	0.126499	0.999997	966	delta/notch-like EGF repeat containing	227325	227325	Dner
ENSMUSG00000030707	5.3146	1.86889	2.02643	1.66821	3.04391	1.60592	0.111003	0.999997	967	coronin, actin binding protein 1A	12721	12721	Coro1a
ENSMUSG00000079045	2.33678	10.1329	1.63096	6.18142	-4.16054	-2.05677	0.173577	0.999997	968	prospero homeobox 1, opposite strand	NA		Prox1os
ENSMUSG00000066944	0.946571	0.244424	0.508697	0.232896	3.40491	1.76761	0.137497	0.999997	969	RIKEN cDNA 4921513D11 gene	NA		4921513D11Rik
ENSMUSG00000098759	2.43942	7.22405	2.40545	3.09847	-2.92771	-1.54977	0.102276	0.999997	970	microRNA 7063	NA		Mir7063
ENSMUSG00000098152	0.934176	0.333107	0.533817	0.288183	3.19314	1.67498	0.123533	0.999997	971	predicted gene, 27025	NA		Gm27025
ENSMUSG00000038764	3.51517	22.119	2.05587	24.0318	-4.09288	-2.03312	0.170381	0.999997	972	protein tyrosine phosphatase, non-receptor type 3	545622	545622	Ptpn3
ENSMUSG00000014782	0.654517	0.366508	0.158765	0.318034	3.77976	1.91829	0.157428	0.999997	973	pleckstrin homology domain containing, family G (with RhoGef domain) member 4	102075	102075	Plekhg4
ENSMUSG00000056145	0.714903	0.18933	0.673358	0.066613	3.46383	1.79237	0.141174	0.999997	974	expressed sequence AI504432	NA		AI504432
ENSMUSG00000049044	8.19086	2.32123	3.6705	1.60604	3.86197	1.94934	0.160571	0.999997	975	Rap guanine nucleotide exchange factor (GEF) 4	56508	56508	Rapgef4
ENSMUSG00000090260	0.238365	0.843628	0.178154	0.734879	-3.43919	-1.78207	0.140649	0.999997	976	RIKEN cDNA 2810442N19 gene	NA		2810442N19Rik
ENSMUSG00000070594	0.275627	0.0252945	0.249662	0.0438113	4.61327	2.20579	0.18886	0.999997	977	predicted gene 4788	214403	214403	Gm4788
ENSMUSG00000039116	2.21304	0.7387	2.72641	0.693492	6.58862	2.71998	0.217245	0.999997	978	adhesion G protein-coupled receptor G6	215798	215798	Adgrg6
ENSMUSG00000022853	1.90911	0.784349	0.339529	0.289954	2.63395	1.39723	0.0673412	0.999997	979	enoyl-Coenzyme A, hydratase/3-hydroxyacyl Coenzyme A dehydrogenase	74147	74147	Ehhadh
ENSMUSG00000097440	0.881863	2.34465	0.23264	0.452113	-2.51489	-1.33049	0.0434249	0.999997	980	predicted gene 6277	NA		Gm6277
ENSMUSG00000036931	5.74223	2.19658	3.40777	1.8359	4.24764	2.08666	0.178263	0.999997	981	nuclear factor of kappa light polypeptide gene enhancer in B cells inhibitor, delta	243910	243910	Nfkbid
ENSMUSG00000028841	0.622883	0.225009	0.0728682	0.053748	2.72712	1.44738	0.0813447	0.999997	982	connector enhancer of kinase suppressor of Ras 1	194231	194231	Cnksr1
ENSMUSG00000036446	0.177462	0.0283325	0.234263	0.0490734	3.67878	1.87923	0.154707	0.999997	983	lumican	17022	17022	Lum
ENSMUSG00000020173	2.93936	0.677681	2.17406	0.210993	3.87095	1.95269	0.162406	0.999997	984	cordon-bleu WH2 repeat	12808	12808	Cobl
ENSMUSG00000032380	62.1976	19.8107	51.0718	16.0234	4.43314	2.14833	0.18474	0.999997	985	death-associated protein kinase 2	13143	13143	Dapk2
ENSMUSG00000034591	16.0866	5.97571	9.34913	4.4404	3.34954	1.74396	0.137919	0.999997	986	solute carrier family 41, member 2	338365	338365	Slc41a2
ENSMUSG00000081752	0.935036	0.355869	0.257744	0.462472	3.14515	1.65313	0.122511	0.999997	987	predicted gene 14680	NA		Gm14680
ENSMUSG00000003949	1.04621	1.35041	1.59528	1.13777	-4.90006	-2.2928	0.196405	0.999997	988	hepatic leukemia factor	217082	217082	Hlf
ENSMUSG00000044770	0.156303	6.79657	0.0935042	11.2735	-6.34008	-2.6645	0.216168	0.999997	989	sex comb on midleg-like 4 (Drosophila)	268297	268297	Scml4
ENSMUSG00000026582	7.47773	2.92723	1.43472	1.67863	2.71234	1.43954	0.0802774	0.999997	990	selectin, endothelial cell	20339	20339	Sele
ENSMUSG00000087141	19.1399	8.77305	3.00017	5.84829	2.84337	1.5076	0.0954396	0.999997	991	phosphatidylinositol-specific phospholipase C, X domain containing 2	433022	433022	Plcxd2
ENSMUSG00000027555	28.4384	12.5193	1.02922	8.36055	2.75031	1.4596	0.0855629	0.999997	992	carbonic anhydrase 13	71934	71934	Car13
ENSMUSG00000055782	8.38426	24.7813	0.870326	10.5634	-2.55517	-1.35342	0.0542372	0.999997	993	ATP-binding cassette, sub-family D (ALD), member 2	26874	26874	Abcd2
ENSMUSG00000100141	1.03703	0.3012	0.46034	0.272136	4.08784	2.03134	0.174169	0.999997	994	predicted gene 6445	NA		Gm6445
ENSMUSG00000073867	0.0664831	0.230501	0.0655573	0.0834553	-3.14303	-1.65216	0.123455	0.999997	995	expressed sequence AA474408	NA		AA474408
ENSMUSG00000044976	0.0386027	0	0.0388452	0	3.56211	1.83273	0.150723	0.999997	996	WD repeat domain 72	546144	546144	Wdr72
ENSMUSG00000022367	1.72991	0.66229	1.3584	0.875488	5.35575	2.42109	0.204193	0.999997	997	hyaluronan synthase 2	15117	15117	Has2
ENSMUSG00000022208	0.297356	0.100464	0.103297	0.0375629	3.04652	1.60716	0.115845	0.999997	998	junctophilin 4	319984	319984	Jph4
ENSMUSG00000106357	1.93395	0.679193	0.954809	0.587593	3.09801	1.63134	0.12	0.999997	999	predicted gene 8013	NA		Gm8013
ENSMUSG00000024659	286.664	74.1135	189.365	15.4253	3.31135	1.72742	0.136833	0.999997	1000	annexin A1	16952	16952	Anxa1
ENSMUSG00000085639	0.771661	0.247728	0.399902	0.214816	3.20574	1.68066	0.128787	0.999997	1001	predicted gene 15410	NA		Gm15410
ENSMUSG00000044165	0.90566	0.240986	0.973486	0.157182	3.59427	1.8457	0.153087	0.999997	1002	BCLl2-like 15	229672	229672	Bcl2l15
ENSMUSG00000026872	10.0135	4.20137	3.88863	3.0102	2.96146	1.56631	0.109157	0.999997	1003	zinc finger E-box binding homeobox 2	24136	24136	Zeb2
ENSMUSG00000085521	0.18262	0.574214	0.0522526	0.203375	-2.65696	-1.40977	0.0766893	0.999997	1004	RIKEN cDNA 4930526A20 gene	NA		4930526A20Rik
ENSMUSG00000040350	1.21946	0.495408	0.51058	0.261326	2.8157	1.49349	0.0957967	0.999997	1005	tripartite motif-containing 7	94089	94089	Trim7
ENSMUSG00000027996	16.2117	0.691645	26.6754	0.599045	8.6884	3.11909	0.231258	0.999997	1006	secreted frizzled-related protein 2	20319	20319	Sfrp2
ENSMUSG00000061728	0.259691	0.0685877	0.155774	0.118797	3.26207	1.70579	0.133841	0.999997	1007	butyrophilin-like 7, pseudogene	NA		Btnl7-ps
ENSMUSG00000037060	33.9934	115.475	13.8444	81.2231	-3.10256	-1.63346	0.12171	0.999997	1008	protein kinase C, delta binding protein	109042	109042	Prkcdbp
ENSMUSG00000034330	20.3165	8.68229	9.68192	7.30855	3.48234	1.80006	0.148776	0.999997	1009	phospholipase C, gamma 2	234779	234779	Plcg2
ENSMUSG00000060206	24.7253	10.7569	3.59364	8.30525	3.34851	1.74352	0.140991	0.999997	1010	zinc finger protein 462	242466	242466	Zfp462
ENSMUSG00000100005	3.12616	5.56619	4.03808	3.55062	-3.47755	-1.79807	0.149294	0.999997	1011	RIKEN cDNA B130024G19 gene	NA		B130024G19Rik
ENSMUSG00000097142	4.24743	9.19868	5.05269	4.28343	-3.63435	-1.8617	0.157133	0.999997	1012	predicted gene, 26778	NA		Gm26778
ENSMUSG00000020542	0.5051	0.179543	0.570583	0.209182	3.87152	1.9529	0.169138	0.999997	1013	myocardin	214384	214384	Myocd
ENSMUSG00000095385	0.0194721	0.58695	0.0337266	0.988804	-5.39058	-2.43044	0.207339	0.999997	1014	RIKEN cDNA D630033O11 gene	NA		D630033O11Rik
ENSMUSG00000042357	0.325685	0.118607	0.149479	0.120968	3.62462	1.85783	0.156963	0.999997	1015	gap junction protein, beta 5	14622	14622	Gjb5
ENSMUSG00000005640	0.1092	0.268587	0.10613	0.143953	-3.35673	-1.74706	0.142762	0.999997	1016	insulin receptor-related receptor	23920	23920	Insrr
ENSMUSG00000105408	2.49463	6.46438	0.507347	1.31138	-2.48033	-1.31053	0.0449923	0.999997	1017	predicted gene 7285	NA		Gm7285
ENSMUSG00000026068	16.0199	8.50653	7.71231	8.15573	3.24403	1.69779	0.135672	0.999997	1018	interleukin 18 receptor accessory protein	16174	16174	Il18rap
ENSMUSG00000032724	3.50331	1.44021	2.45804	0.697408	2.91687	1.54442	0.10887	0.999997	1019	ankyrin repeat and BTB (POZ) domain containing 2	99382	99382	Abtb2
ENSMUSG00000111713	0.576658	1.27346	0.558061	0.516038	-2.8487	-1.5103	0.101881	0.999997	1020		NA		AL603745.2
ENSMUSG00000108362	1.14927	0.172532	1.09069	0.298835	5.08384	2.34592	0.204177	0.999997	1021	predicted gene, 18561	NA		Gm18561
ENSMUSG00000039809	0.0684766	0.365498	0.0410752	0.269317	-3.32025	-1.73129	0.141427	0.999997	1022	gamma-aminobutyric acid (GABA) B receptor, 2	242425	242425	Gabbr2
ENSMUSG00000078776	1.553	0.726141	0.379761	0.371323	2.5815	1.36821	0.0683246	0.999997	1023	RIKEN cDNA 9530053A07 gene	319482	319482	9530053A07Rik
ENSMUSG00000103662	0.239451	0.934715	0.165492	0.786013	-3.53479	-1.82162	0.154492	0.999997	1024	predicted gene, 34294	NA		Gm34294
ENSMUSG00000046618	2.67612	10.2561	1.2599	8.33935	-3.45602	-1.78911	0.150684	0.999997	1025	olfactomedin-like 2A	241327	241327	Olfml2a
ENSMUSG00000035095	9.36889	32.8164	6.13313	22.4646	-3.28155	-1.71438	0.139789	0.999997	1026	family with sequence similarity 167, member A	219148	219148	Fam167a
ENSMUSG00000036718	55.306	26.5733	12.5921	20.3298	3.07615	1.62112	0.124438	0.999997	1027	MICAL-like 2	231830	231830	Micall2
ENSMUSG00000054252	0.265213	2.58178	0.0914544	3.5857	-4.2268	-2.07957	0.186711	0.999997	1028	fibroblast growth factor receptor 3	14184	14184	Fgfr3
ENSMUSG00000083268	0.346474	1.24302	0.32115	0.183158	-2.85546	-1.51373	0.104058	0.999997	1029	predicted gene 11511	NA		Gm11511
ENSMUSG00000035551	0.115867	0.0213409	0.114192	0.0369636	3.54079	1.82407	0.155353	0.999997	1030	insulin-like growth factor binding protein-like 1	75426	75426	Igfbpl1
ENSMUSG00000097697	0.679718	0.175218	0.403055	0.109968	3.28378	1.71536	0.140557	0.999997	1031	RIKEN cDNA 4833412C05 gene	NA		4833412C05Rik
ENSMUSG00000097789	1.31007	0.691838	0.324839	0.544047	2.67984	1.42215	0.0856683	0.999997	1032	predicted gene 2115	NA		Gm2115
ENSMUSG00000079685	82.2824	22.237	50.0625	5.52124	3.3468	1.74278	0.145394	0.999997	1033	UL16 binding protein 1	77777	77777	Ulbp1
ENSMUSG00000047415	0.369011	1.16275	0.373615	0.995525	-3.66909	-1.87542	0.162584	0.999997	1034	G protein-coupled receptor 68	238377	238377	Gpr68
ENSMUSG00000092124	1.03193	0.35646	0.393912	0.211501	2.64673	1.40421	0.0834161	0.999997	1035	RIKEN cDNA B930094E09 gene	NA		B930094E09Rik
ENSMUSG00000031618	2.18196	6.27595	0.612408	3.48762	-2.51879	-1.33273	0.0586138	0.999997	1036	nuclear receptor subfamily 3, group C, member 2	110784	110784	Nr3c2
ENSMUSG00000027035	23.0089	9.2962	10.6218	5.64628	2.82565	1.49858	0.10261	0.999997	1037	ceramide synthase 6	241447	241447	Cers6
ENSMUSG00000053702	0.0543024	0.240154	0.0103953	0.227446	-2.94449	-1.55802	0.114801	0.999997	1038	nebulette	74103	74103	Nebl
ENSMUSG00000040328	1.54392	0.355162	1.13034	0.161277	3.72493	1.89721	0.166551	0.999997	1039	olfactory receptor 56	18356	18356	Olfr56
ENSMUSG00000056888	28.5113	4.92259	41.8411	4.46806	6.79418	2.7643	0.22839	0.999997	1040	GLI pathogenesis-related 1 (glioma)	73690	73690	Glipr1
ENSMUSG00000054871	38.4735	184.031	44.2992	218.585	-4.32467	-2.11259	0.19193	0.999997	1041	transmembrane protein 158	72309	72309	Tmem158
ENSMUSG00000041046	16.4345	75.3069	23.4537	69.3374	-8.28346	-3.05023	0.237049	0.999997	1042	receptor (calcitonin) activity modifying protein 3	56089	56089	Ramp3
ENSMUSG00000036353	0.181546	0.0316628	0.0666747	0.0548415	3.2927	1.71927	0.144069	0.999997	1043	purinergic receptor P2Y, G-protein coupled 12	70839	70839	P2ry12
ENSMUSG00000015981	0.476832	1.7722	0.329815	1.34416	-3.43273	-1.77936	0.153028	0.999997	1044	serine/threonine kinase 32C	57740	57740	Stk32c
ENSMUSG00000086324	0.434089	0.560057	0.559968	0.174371	-3.707	-1.89025	0.167541	0.999997	1045	predicted gene 15564	NA		Gm15564
ENSMUSG00000028417	0.629257	1.8283	0.732746	1.9535	-3.95017	-1.98192	0.178274	0.999997	1046	T cell acute lymphocytic leukemia 2	21350	21350	Tal2
ENSMUSG00000024883	24.4686	10.902	5.8318	6.73754	2.71171	1.4392	0.0925341	0.999997	1047	Ras and Rab interactor 1	225870	225870	Rin1
ENSMUSG00000098246	0.382114	0.208282	0.167259	0.360755	3.18407	1.67087	0.136499	0.999997	1048	predicted gene 7627	NA		Gm7627
ENSMUSG00000039357	11.9506	32.5479	6.66398	16.3299	-2.80481	-1.4879	0.103092	0.999997	1049	fucosyltransferase 11	73068	73068	Fut11
ENSMUSG00000033730	0.439238	1.59667	0.0267003	0.95812	-2.91028	-1.54116	0.113761	0.999997	1050	early growth response 3	13655	13655	Egr3
ENSMUSG00000070323	0.198556	0.0627674	0.111102	0.108716	3.95484	1.98362	0.17912	0.999997	1051	matrix metallopeptidase 27	234911	234911	Mmp27
ENSMUSG00000040987	1.08631	0.431442	0.321531	0.215534	2.63248	1.39642	0.0839871	0.999997	1052	MHC I like leukocyte 2	243864	243864	Mill2
ENSMUSG00000022144	1.28972	0.828864	0.89423	1.18477	3.89817	1.9628	0.17725	0.999997	1053	glial cell line derived neurotrophic factor	14573	14573	Gdnf
ENSMUSG00000034853	1.30308	0.518844	0.678423	0.226874	2.74223	1.45535	0.0971994	0.999997	1054	acyl-CoA thioesterase 11	329910	329910	Acot11
ENSMUSG00000086855	0.478966	1.54538	0.16331	0.418188	-2.91624	-1.54411	0.114931	0.999997	1055	predicted gene 13844	NA		Gm13844
ENSMUSG00000099757	0.246948	0.0738153	0.194693	0.0365543	3.07555	1.62084	0.129176	0.999997	1056	expressed sequence BE692007	NA		BE692007
ENSMUSG00000031740	259.098	107.217	127.101	77.5527	3.26951	1.70908	0.144258	0.999997	1057	matrix metallopeptidase 2	17390	17390	Mmp2
ENSMUSG00000045659	0.373633	0.151914	0.128675	0.109611	2.85568	1.51384	0.10906	0.999997	1058	pleckstrin homology domain containing, family A member 7	233765	233765	Plekha7
ENSMUSG00000002944	0.687487	40.59	0.567153	68.086	-9.26516	-3.21182	0.242279	0.999997	1059	CD36 antigen	12491	12491	Cd36
ENSMUSG00000032068	11.9614	5.18341	10.3654	4.90401	3.21253	1.68371	0.140402	0.999997	1060	placenta expressed transcript 1	76509	76509	Plet1
ENSMUSG00000029212	0.0385848	0.0100243	0.0286948	0.0173626	4.64637	2.2161	0.202098	0.999997	1061	gamma-aminobutyric acid (GABA) A receptor, subunit beta 1	14400	14400	Gabrb1
ENSMUSG00000033722	6.64096	2.98717	1.0934	1.57622	2.58292	1.369	0.0776763	0.999997	1062	cDNA sequence BC034090	207792	207792	BC034090
ENSMUSG00000000154	2.68261	9.80091	1.30603	3.95	-3.04781	-1.60777	0.127318	0.999997	1063	solute carrier family 22 (organic cation transporter), member 18	18400	18400	Slc22a18
ENSMUSG00000028009	4.7888	0.987804	4.84222	1.62509	9.28704	3.21522	0.242988	0.999997	1064	RIKEN cDNA 1700061I17 gene	NA		1700061I17Rik
ENSMUSG00000073077	0.108017	0.0334378	0.0621311	0.0318607	3.30405	1.72424	0.148118	0.999997	1065	predicted gene 7173	636104	636104/667736	Gm7173
ENSMUSG00000089663	0.205389	0.0598211	0.145934	0.0522424	2.91753	1.54475	0.116073	0.999997	1066	predicted gene 15651	NA		Gm15651
ENSMUSG00000037624	1.3558	0.52982	0.360517	0.16454	2.47059	1.30486	0.0543553	0.999997	1067	potassium channel, subfamily K, member 2	16526	16526	Kcnk2
ENSMUSG00000026207	1.65004	0.605353	1.43424	0.367549	3.36698	1.75145	0.152402	0.999997	1068	SPEG complex locus	11790	11790	Speg
ENSMUSG00000077569	3.08664	9.39014	1.59961	0.631039	-2.57822	-1.36638	0.0778633	0.999997	1069	predicted gene, 24608	NA		Gm24608
ENSMUSG00000028444	0.379002	0.112792	0.361082	0.0975802	3.40819	1.76901	0.154158	0.999997	1070	ciliary neurotrophic factor receptor	12804	12804	Cntfr
ENSMUSG00000032332	7.66181	3.8381	8.1557	4.97102	3.95108	1.98225	0.183522	0.999997	1071	collagen, type XII, alpha 1	12816	12816	Col12a1
ENSMUSG00000071537	4.0878	1.85966	1.90222	1.4515	2.92473	1.5483	0.118225	0.999997	1072	killer cell lectin-like receptor subfamily G, member 2	74253	74253	Klrg2
ENSMUSG00000030865	0.217132	10.8288	0.205884	17.9777	-13.496	-3.75446	0.250251	0.999997	1073	calcineurin-like EF hand protein 2	70261	70261	Chp2
ENSMUSG00000037962	0.877384	0.670106	0.489574	1.00309	3.55686	1.8306	0.163328	0.999997	1074	refilin A	73121	73121	Rflna
ENSMUSG00000106993	0.0712564	0.192093	0.0646254	0.0448483	-2.86107	-1.51656	0.112592	0.999997	1075	predicted gene 43417	NA		Gm43417
ENSMUSG00000066026	23.6525	54.4742	28.7318	31.3513	-3.86905	-1.95198	0.179099	0.999997	1076	dehydrogenase/reductase (SDR family) member 3	20148	20148	Dhrs3
ENSMUSG00000054258	2.19539	0.675488	1.94246	0.778099	3.79984	1.92594	0.17683	0.999997	1077	predicted gene 5082	NA		Gm5082
ENSMUSG00000104402	0.0489469	0.275037	0.069105	0.326481	-3.5382	-1.82301	0.162512	0.999997	1078	predicted gene, 38012	NA		Gm38012
ENSMUSG00000079293	0.545916	0.212122	0.284398	0.183723	3.30473	1.72453	0.1507	0.999997	1079	C-type lectin domain family 7, member a	56644	56644	Clec7a
ENSMUSG00000047104	4.54234	1.34096	3.43643	1.03865	3.69435	1.88532	0.173208	0.999997	1080	phosphatidylethanolamine binding protein 2	76400	76400	Pbp2
ENSMUSG00000028544	0.0872534	0.0774892	0.151127	0.0382766	-3.96914	-1.98883	0.18524	0.999997	1081	solute carrier family 5 (sodium/glucose cotransporter), member 9	230612	230612	Slc5a9
ENSMUSG00000102533	0.0549219	0.213927	0.052758	0.0787796	-2.8128	-1.49201	0.108658	0.999997	1082	predicted gene, 37226	NA		Gm37226
ENSMUSG00000028782	0.128072	0.0169053	0.166846	0.016108	3.87749	1.95512	0.181132	0.999997	1083	adhesion G protein-coupled receptor B2	230775	230775	Adgrb2
ENSMUSG00000078931	0.582486	1.88435	0.555085	1.37343	-3.39611	-1.76388	0.155143	0.999997	1084	peptide deformylase (mitochondrial)	68023	68023	Pdf
ENSMUSG00000083982	0.630487	0.19693	0.289374	0.0531712	2.7851	1.47773	0.106356	0.999997	1085	predicted gene 14650	NA		Gm14650
ENSMUSG00000020857	4.76288	2.05477	1.49541	0.832979	2.62677	1.39329	0.0875818	0.999997	1086	NME/NM23 nucleoside diphosphate kinase 2	18103	18103	Nme2
ENSMUSG00000026107	27.2733	13.2813	13.5562	13.081	2.96703	1.56902	0.124435	0.999997	1087	nucleic acid binding protein 1	109019	109019	Nabp1
ENSMUSG00000085399	5.79773	2.98876	1.58445	2.62786	2.8863	1.52922	0.117502	0.999997	1088	forkhead box D2, opposite strand	NA		Foxd2os
ENSMUSG00000102160	0.173699	0.0502776	0.158445	0.0870834	3.58556	1.8422	0.167285	0.999997	1089	predicted gene, 36944	NA		Gm36944
ENSMUSG00000113093	0.281838	0.0243692	0.245444	0.0422087	3.72962	1.89903	0.176196	0.999997	1090		NA		AC163651.1
ENSMUSG00000028071	0.547469	1.31954	0.57915	0.599335	-3.38957	-1.7611	0.156588	0.999997	1091	SH2 domain containing 2A	27371	27371	Sh2d2a
ENSMUSG00000082651	1.84891	3.16958	3.0045	2.761	-3.57272	-1.83702	0.167359	0.999997	1092	predicted gene 14001	NA		Gm14001
ENSMUSG00000034762	5.49932	12.7463	2.7587	4.11674	-2.51531	-1.33074	0.0706726	0.999997	1093	GLIS family zinc finger 1	230587	230587	Glis1
ENSMUSG00000084780	1.23919	0.341561	0.440919	0.319837	2.92151	1.54671	0.121535	0.999997	1094	predicted gene 15350	NA		Gm15350
ENSMUSG00000093394	0.176186	0.485314	0.240564	0.194033	-3.66666	-1.87446	0.173934	0.999997	1095	predicted gene 20621	NA		Gm20621
ENSMUSG00000045589	0.126876	0.0730748	0.114961	0.111561	3.29548	1.72049	0.152602	0.999997	1096	ferric-chelate reductase 1 like	230235	230235	Frrs1l
ENSMUSG00000047419	0.0951386	0.0215767	0.0456741	0.00784133	3.2286	1.69091	0.148122	0.999997	1097	cardiomyopathy associated 5	76469	76469	Cmya5
ENSMUSG00000105636	0.123623	0.596264	0.214121	0.484865	-3.24711	-1.69916	0.149526	0.999997	1098	predicted gene 43625	NA		Gm43625
ENSMUSG00000039057	0.173589	0.0526104	0.163517	0.0911238	5.82022	2.54107	0.227784	0.999997	1099	myosin XVI	244281	244281	Myo16
ENSMUSG00000053835	1.07135	3.26972	1.33083	3.02437	-4.083	-2.02963	0.191744	0.999997	1100	histocompatibility 2, T region locus 24	15042	15042	H2-T24
ENSMUSG00000058607	2.00931	0.686868	0.329354	0.599022	2.87006	1.52108	0.117795	0.999997	1101	ribosomal protein L31, pseudogene 20	NA		Rpl31-ps20
ENSMUSG00000036162	1.33195	0.325685	0.969215	0.34269	3.66289	1.87298	0.174475	0.999997	1102	family with sequence similarity 219, member A, opposite strand	NA		Fam219aos
ENSMUSG00000026483	3.09791	1.56371	1.46355	1.25211	2.87097	1.52154	0.118479	0.999997	1103	family with sequence similarity 129, member A	63913	63913	Fam129a
ENSMUSG00000006958	0.258967	0.0887135	0.175714	0.0809168	3.57401	1.83754	0.169674	0.999997	1104	chordin	12667	12667	Chrd
ENSMUSG00000034755	0.119002	0.0348133	0.180493	0.0602984	6.205	2.63343	0.232024	0.999997	1105	protocadherin 11 X-linked	245578	245578	Pcdh11x
ENSMUSG00000017737	1.25287	0.416637	1.45937	0.352128	3.26363	1.70648	0.151488	0.999997	1106	matrix metallopeptidase 9	17395	17395	Mmp9
ENSMUSG00000019929	164.608	72.832	126.692	63.0769	5.46158	2.44932	0.224101	0.999997	1107	decorin	13179	13179	Dcn
ENSMUSG00000022657	0.682819	0.16394	0.571564	0.196036	4.23109	2.08103	0.197713	0.999997	1108	CD96 antigen	84544	84544	Cd96
ENSMUSG00000084936	2.89473	0.792491	2.14863	0.702688	3.58719	1.84285	0.171168	0.999997	1109	predicted gene 11583	NA		Gm11583
ENSMUSG00000021090	0.107506	0.0328376	0.0230064	0.028504	2.96935	1.57015	0.127429	0.999997	1110	leucine rich repeat containing 9	78257	78257	Lrrc9
ENSMUSG00000038879	0.219705	0.0105377	0.204845	0.0182518	5.34646	2.41858	0.221989	0.999997	1111	NIPA-like domain containing 2	223473	223473	Nipal2
ENSMUSG00000073018	0.246885	0.100448	0.122267	0.109512	3.05249	1.60999	0.135051	0.999997	1112	predicted gene 1070	NA		Gm1070
ENSMUSG00000090273	0.0663702	0.325794	0.058748	0.201038	-3.36014	-1.74852	0.15815	0.999997	1113	proline rich 22	100504446	100504446	Prr22
ENSMUSG00000021367	820.151	324.549	494.171	345.143	3.64517	1.86599	0.175263	0.999997	1114	endothelin 1	13614	13614	Edn1
ENSMUSG00000106209	1.26225	0.270129	1.15388	0.124407	3.20812	1.68173	0.148731	0.999997	1115	predicted gene 42918	NA		Gm42918
ENSMUSG00000087119	0.291258	0.0381151	0.276411	0.0660173	3.47296	1.79616	0.165281	0.999997	1116	autophagy related 4A, pseudogene	NA		Atg4a-ps
ENSMUSG00000040265	3.1372	7.33911	1.71143	3.24803	-2.52909	-1.33862	0.0778578	0.999997	1117	dynamin 3	103967	103967	Dnm3
ENSMUSG00000093507	0.966252	0.282524	0.466527	0.102674	2.82985	1.50072	0.116007	0.999997	1118	predicted gene 20627	NA		Gm20627
ENSMUSG00000031712	1.63402	0.667684	0.37302	0.256627	2.48019	1.31045	0.0684631	0.999997	1119	interleukin 15	16168	16168	Il15
ENSMUSG00000087639	0.566415	0.163625	0.431192	0.145083	3.37302	1.75404	0.16091	0.999997	1120	predicted gene 15512	NA		Gm15512
ENSMUSG00000042677	27.8429	11.445	11.4064	6.08396	2.74575	1.4572	0.108968	0.999997	1121	zinc finger CCCH type containing 12A	230738	230738	Zc3h12a
ENSMUSG00000087026	1.31397	0.553758	0.339917	0.324922	2.64373	1.40257	0.0972936	0.999997	1122	RIKEN cDNA A230103J11 gene	NA		A230103J11Rik
ENSMUSG00000044071	0.436526	0.100992	0.480677	0.0912368	5.98279	2.58082	0.234004	0.999997	1123	family with sequence similarity 19, member A2	268354	268354	Fam19a2
ENSMUSG00000086150	0.272382	0.11378	0.0779361	0.151652	2.94395	1.55775	0.129176	0.999997	1124	BTB and CNC homology 2, opposite strand	NA		Bach2os
ENSMUSG00000022018	12.7048	2.23861	16.7225	3.16498	5.71564	2.51492	0.231218	0.999997	1125	regulator of cell cycle	66214	66214	Rgcc
ENSMUSG00000003849	272.337	1116.14	189.942	957.565	-3.54236	-1.82471	0.173386	0.999997	1126	NAD(P)H dehydrogenase, quinone 1	18104	18104	Nqo1
ENSMUSG00000044461	0.783743	2.49845	0.194354	1.48854	-2.7415	-1.45497	0.109273	0.999997	1127	shisa family member 2	219134	219134	Shisa2
ENSMUSG00000039005	75.4559	34.617	3.86178	25.3343	3.14418	1.65268	0.146871	0.999997	1128	toll-like receptor 4	21898	21898	Tlr4
ENSMUSG00000049892	1.50028	6.72741	1.65273	7.52563	-3.98028	-1.99287	0.194444	0.999997	1129	RAS, dexamethasone-induced 1	19416	19416	Rasd1
ENSMUSG00000101268	0.310115	0.0961571	0.0318663	0.101178	3.18848	1.67287	0.151648	0.999997	1130	RIKEN cDNA 2010310C07 gene	NA		2010310C07Rik
ENSMUSG00000030263	0.211942	0.484381	0.286318	0.290471	-3.90915	-1.96685	0.192675	0.999997	1131	lymphoid-restricted membrane protein	16970	16970	Lrmp
ENSMUSG00000016526	26.246	9.72002	12.5851	4.37918	2.72995	1.44888	0.109663	0.999997	1132	dual-specificity tyrosine-(Y)-phosphorylation regulated kinase 3	226419	226419	Dyrk3
ENSMUSG00000050761	0.477298	1.5229	0.579935	0.733318	-3.46712	-1.79374	0.171052	0.999997	1133	glycoprotein Ib, beta polypeptide	14724	14724	Gp1bb
ENSMUSG00000041540	0.365389	1.10509	0.289306	0.855734	-2.9409	-1.55626	0.130559	0.999997	1134	SRY (sex determining region Y)-box 5	20678	20678	Sox5
ENSMUSG00000016758	31.0763	82.2053	11.4082	52.4298	-2.72727	-1.44745	0.109578	0.999997	1135	BCL2-interacting killer	12124	12124	Bik
ENSMUSG00000026874	0.138375	0.0343779	0.0946613	0.00377836	3.0084	1.58899	0.137671	0.999997	1136	hemolytic complement	15139	15139	Hc
ENSMUSG00000019856	0.777667	2.31695	0.148556	0.958211	-2.50856	-1.32686	0.0801257	0.999997	1137	family with sequence similarity 184, member A	75906	75906	Fam184a
ENSMUSG00000079069	1.38714	0.497244	0.599907	0.70376	3.49475	1.80519	0.173875	0.999997	1138	RIKEN cDNA 8430423G03 gene	NA		8430423G03Rik
ENSMUSG00000097007	0.106469	0.308001	0.104986	0.0949581	-2.85656	-1.51428	0.12409	0.999997	1139	RIKEN cDNA 4930432B10 gene	NA		4930432B10Rik
ENSMUSG00000109366	1.65578	0.485225	0.957403	0.472871	2.95887	1.56504	0.133258	0.999997	1140	predicted gene 44698	NA		Gm44698
ENSMUSG00000042607	9.49068	4.46307	1.79398	3.62913	3.42699	1.77694	0.169871	0.999997	1141	ankyrin repeat and SOCS box-containing 4	65255	65255	Asb4
ENSMUSG00000037347	33.1427	16.4856	2.91927	12.0629	2.85115	1.51154	0.123413	0.999997	1142	carbohydrate (N-acetylglucosamino) sulfotransferase 7	60322	60322	Chst7
ENSMUSG00000034171	0.0872375	0.0349094	0.0320234	0.0407458	3.1412	1.65132	0.149417	0.999997	1143	fatty acid amide hydrolase	14073	14073	Faah
ENSMUSG00000111063	0.235245	0.109324	0.114898	0.1105	3.13566	1.64877	0.148979	0.999997	1144		NA		AC125374.1
ENSMUSG00000039043	19.798	63.7817	12.96	34.8636	-3.15374	-1.65706	0.151284	0.999997	1145	actin-related protein 2/3 complex inhibitor	70420	70420	Arpin
ENSMUSG00000032372	40.436	9.86878	38.2038	8.37933	4.05554	2.0199	0.198571	0.999997	1146	phospholipid scramblase 2	18828	18828	Plscr2
ENSMUSG00000022180	0.129241	0.0162178	0.183804	0.02809	4.10327	2.03677	0.20055	0.999997	1147	solute carrier family 7 (cationic amino acid transporter, y+ system), member 8	50934	50934	Slc7a8
ENSMUSG00000110017	0.294356	0.807723	0.0742132	0.217944	-2.62652	-1.39315	0.100098	0.999997	1148	predicted gene 45237	NA		Gm45237
ENSMUSG00000064540	14.6793	4.93986	2.27862	1.52298	2.50536	1.32502	0.0830438	0.999997	1149	small nucleolar RNA, C/D box 42A	NA		Snord42a
ENSMUSG00000066319	0.114891	0.522792	0.0357665	0.552323	-3.07772	-1.62186	0.145237	0.999997	1150	receptor transporter protein 3	235636	235636	Rtp3
ENSMUSG00000023982	0.752733	0.201	0.483978	0.05427	3.18539	1.67147	0.154535	0.999997	1151	guanylate cyclase activator 1a (retina)	14913	14913	Guca1a
ENSMUSG00000027748	0.0914956	0.0690817	0.0936695	0.119653	4.14081	2.04991	0.202613	0.999997	1152	transient receptor potential cation channel, subfamily C, member 4	22066	22066	Trpc4
ENSMUSG00000015890	0.665728	0.250238	0.428049	0.00735824	2.61723	1.38804	0.10017	0.999997	1153	amidohydrolase domain containing 1	71761	71761	Amdhd1
ENSMUSG00000086109	8.33451	17.0074	5.04316	6.0232	-2.74279	-1.45565	0.11498	0.999997	1154	predicted gene 13391	NA		Gm13391
ENSMUSG00000097487	5.16361	2.35707	0.928434	1.42054	2.61632	1.38754	0.0999907	0.999997	1155	prostaglandin E synthase 3 (cytosolic)-like	73635	73635	Ptges3l
ENSMUSG00000045744	1.12401	0.300845	0.893041	0.262732	3.2113	1.68316	0.1566	0.999997	1156	BRICHOS domain containing 5	319259	319259	Bricd5
ENSMUSG00000113428	0.178764	0.753783	0.309628	0.263511	-2.99924	-1.58459	0.139679	0.999997	1157		NA		AC122357.1
ENSMUSG00000055421	19.714	10.6409	5.05261	8.69897	3.05447	1.61092	0.145015	0.999997	1158	protocadherin 9	211712	211712	Pcdh9
ENSMUSG00000102460	0.750238	0.22077	0.616368	0.305819	3.40974	1.76966	0.171351	0.999997	1159	predicted gene, 38197	NA		Gm38197
ENSMUSG00000037738	0.950452	2.68806	0.645649	1.66746	-2.77245	-1.47116	0.118533	0.999997	1160	NIMA (never in mitosis gene a)-related expressed kinase 5	330721	330721	Nek5
ENSMUSG00000086881	0.38642	1.09509	0.476931	0.482882	-2.96477	-1.56792	0.136947	0.999997	1161	predicted gene 13594	NA		Gm13594
ENSMUSG00000054169	0.414161	3.43633	0.302221	4.55407	-3.96798	-1.9884	0.198055	0.999997	1162	carcinoembryonic antigen-related cell adhesion molecule 10	26366	26366	Ceacam10
ENSMUSG00000112944	0.052691	0.187153	0.0500052	0.0878116	-2.85089	-1.51141	0.126068	0.999997	1163		NA		AL645643.1
ENSMUSG00000023959	67.1621	181.991	32.9454	49.8486	-2.76805	-1.46887	0.119571	0.999997	1164	chloride intracellular channel 5	224796	224796	Clic5
ENSMUSG00000070047	44.5056	16.4023	24.4087	10.0843	2.86494	1.5185	0.12907	0.999997	1165	FAT atypical cadherin 1	14107	14107	Fat1
ENSMUSG00000023990	3.71085	13.6738	1.90103	12.3169	-3.11801	-1.64063	0.151521	0.999997	1166	transcription factor EB	21425	21425	Tfeb
ENSMUSG00000043889	1.56404	0.622817	0.614177	0.591704	2.9062	1.53913	0.132651	0.999997	1167	predicted gene 8399	NA		Gm8399
ENSMUSG00000036192	0.718168	1.49986	0.768694	0.0319786	-3.25234	-1.70148	0.161591	0.999997	1168	RAR-related orphan receptor beta	225998	225998	Rorb
ENSMUSG00000022949	13.1149	4.13917	8.07356	4.64249	4.00171	2.00062	0.200442	0.999997	1169	chloride intracellular channel 6	209195	209195	Clic6
ENSMUSG00000048424	4.22268	8.14005	6.65422	9.3658	-5.89078	-2.55846	0.241682	0.999997	1170	RAN binding protein 3-like	223332	223332	Ranbp3l
ENSMUSG00000087601	0.299733	0.0950109	0.299718	0.164564	4.0128	2.00461	0.20089	0.999997	1171	ubiquitin carboxy-terminal hydrolase L1, opposite strand	NA		Uchl1os
ENSMUSG00000037025	0.433494	0.017007	0.750833	0.0294571	4.31494	2.10934	0.212247	0.999997	1172	forkhead box A2	15376	15376	Foxa2
ENSMUSG00000028943	0.676653	0.206217	0.420441	0.0758899	2.99249	1.58135	0.141755	0.999997	1173	espin	56226	56226	Espn
ENSMUSG00000111055	0.84638	0.385081	0.351883	0.368396	3.40737	1.76866	0.174095	0.999997	1174		NA		AC153958.1
ENSMUSG00000085998	1.78366	0.437711	1.68505	0.385332	4.29069	2.10121	0.211589	0.999997	1175	expressed sequence AW822252	NA		AW822252
ENSMUSG00000050147	20.4362	10.2085	2.82417	7.32386	2.86414	1.5181	0.130198	0.999997	1176	coagulation factor II (thrombin) receptor-like 3	14065	14065	F2rl3
ENSMUSG00000060044	32.8994	56.2032	46.9858	23.6699	-4.2441	-2.08546	0.209593	0.999997	1177	transmembrane protein 26	327766	327766	Tmem26
ENSMUSG00000113113	2.2319	6.06226	0.983796	1.79853	-2.63134	-1.3958	0.106395	0.999997	1178		NA		AC159818.1
ENSMUSG00000021268	2.67766	0.97313	2.60002	0.611656	3.32245	1.73225	0.170274	0.999997	1179	maternally expressed 3	NA		Meg3
ENSMUSG00000109750	0.368648	1.11809	0.457609	0.274273	-2.8649	-1.51849	0.131063	0.999997	1180	high mobility group box 1, related sequence 17	NA		Hmgb1-rs17
ENSMUSG00000027894	0.991727	6.58632	0.705422	7.81241	-3.46908	-1.79455	0.17873	0.999997	1181	solute carrier family 6 (neurotransmitter transporter), member 17	229706	229706	Slc6a17
ENSMUSG00000108338	1.9271	0.364894	1.561	0.318666	3.23184	1.69235	0.16277	0.999997	1182	predicted gene 44794	NA		Gm44794
ENSMUSG00000058571	2.22993	1.00293	2.85128	1.11452	5.01614	2.32658	0.228763	0.999997	1183	glypican 6	23888	23888	Gpc6
ENSMUSG00000106301	1.14395	0.332373	0.545088	0.03653	2.63372	1.3971	0.108198	0.999997	1184	predicted gene 8365	NA		Gm8365
ENSMUSG00000083014	0.994519	0.234382	0.72572	0.206256	2.85361	1.51279	0.13028	0.999997	1185	predicted gene 11764	NA		Gm11764
ENSMUSG00000091275	0.454076	0.174231	0.208982	0.208342	3.48444	1.80092	0.180588	0.999997	1186	predicted gene 3248	NA		Gm3248
ENSMUSG00000090222	8.00975	19.9815	7.97899	14.7353	-3.08535	-1.62543	0.152696	0.999997	1187	interferon activated gene 203, pseudogene	NA		Ifi203-ps
ENSMUSG00000026679	2.78606	0.834566	2.01	0.433765	2.98493	1.5777	0.144077	0.999997	1188	enkurin, TRPC channel interacting protein	71233	71233	Enkur
ENSMUSG00000024486	112.207	40.6817	55.0915	15.2347	2.74471	1.45665	0.121296	0.999997	1189	heparin-binding EGF-like growth factor	15200	15200	Hbegf
ENSMUSG00000044320	0.428551	1.28345	0.445756	1.0245	-3.34782	-1.74322	0.173951	0.999997	1190	RIKEN cDNA 1700001O22 gene	73598	73598	1700001O22Rik
ENSMUSG00000106092	0.252417	0.461403	0.352203	0.210621	-3.00187	-1.58586	0.146452	0.999997	1191	predicted gene 43072	NA		Gm43072
ENSMUSG00000025175	0.0423531	0.578519	0.0441672	0.889818	-4.17699	-2.06246	0.211547	0.999997	1192	fructosamine 3 kinase	63828	63828	Fn3k
ENSMUSG00000111837	6.69821	18.5166	3.22696	11.2261	-2.51579	-1.33101	0.0946078	0.999997	1193		NA		AC164612.2
ENSMUSG00000024210	2.05326	30.6413	1.41793	43.5962	-4.93628	-2.30342	0.230498	0.999997	1194	inositol hexaphosphate kinase 3	271424	271424	Ip6k3
ENSMUSG00000028926	4.70887	1.88382	1.55932	0.82165	2.75438	1.46173	0.125181	0.999997	1195	cyclin-dependent kinase 14	18647	18647	Cdk14
ENSMUSG00000043008	102.245	42.1363	38.8905	26.1615	2.83599	1.50385	0.13165	0.999997	1196	kelch-like 6	239743	239743	Klhl6
ENSMUSG00000042873	0.565573	1.84576	0.453366	0.941382	-3.21843	-1.68636	0.165445	0.999997	1197	lipoma HMGIC fusion partner-like protein 4	269788	269788	Lhfpl4
ENSMUSG00000011148	5.29138	2.44462	3.1996	1.92402	2.84	1.50589	0.132066	0.999997	1198	adenylosuccinate synthetase like 1	11565	11565	Adssl1
ENSMUSG00000037705	0.141585	0.0453782	0.00937414	0.0313632	2.85198	1.51196	0.133386	0.999997	1199	tectorin alpha	21683	21683	Tecta
ENSMUSG00000044349	9.38645	4.35594	2.41115	2.99578	2.8047	1.48785	0.129717	0.999997	1200	small nucleolar RNA host gene 11	319317	319317	Snhg11
ENSMUSG00000040133	9.51788	3.24153	5.61739	1.11524	3.3287	1.73496	0.175649	0.999997	1201	G protein-coupled receptor 176	381413	381413	Gpr176
ENSMUSG00000032925	1.31387	0.249933	1.94976	0.208572	5.02407	2.32886	0.233738	0.999997	1202	integrin, beta-like 1	223272	223272	Itgbl1
ENSMUSG00000046523	1.29059	0.775033	0.33591	0.675912	3.43371	1.77977	0.183072	0.999997	1203	potassium channel tetramerisation domain containing 4	67516	67516	Kctd4
ENSMUSG00000044276	0.0757562	0.503411	0.0935004	0.498111	-3.59604	-1.84641	0.191315	0.999997	1204	RIKEN cDNA 4933427E11 gene	NA		4933427E11Rik
ENSMUSG00000104040	0.168455	0.572017	0.191827	0.160267	-2.84922	-1.51057	0.133805	0.999997	1205	predicted gene, 37563	NA		Gm37563
ENSMUSG00000074968	33.3959	12.6703	16.0135	7.46321	2.7732	1.47155	0.128523	0.999997	1206	anoctamin 3	228432	228432	Ano3
ENSMUSG00000059852	2.11908	4.78086	1.53673	2.00915	-2.71821	-1.44266	0.122909	0.999997	1207	potassium voltage-gated channel, subfamily G, member 2	240444	240444	Kcng2
ENSMUSG00000021342	0.403895	0	0.699566	0	3.85165	1.94547	0.202494	0.999997	1208	prolactin	19109	19109	Prl
ENSMUSG00000041907	1.67397	0.819052	0.281246	0.623472	2.64358	1.40249	0.115047	0.999997	1209	G protein-coupled receptor 45	93690	93690	Gpr45
ENSMUSG00000086942	0.336912	0.134443	0.216621	0.232861	3.17762	1.66795	0.165037	0.999997	1210	predicted gene 15489	NA		Gm15489
ENSMUSG00000029664	1034.53	400.116	952.438	511.971	3.6839	1.88123	0.197068	0.999997	1211	tissue factor pathway inhibitor 2	21789	21789	Tfpi2
ENSMUSG00000086522	2.81353	6.02653	2.46852	2.94837	-2.65428	-1.40832	0.116619	0.999997	1212	predicted gene 4473	NA		Gm4473
ENSMUSG00000050359	13.677	3.24831	16.463	1.35227	3.70375	1.88899	0.197895	0.999997	1213	small proline-rich protein 1A	20753	20753	Sprr1a
ENSMUSG00000038725	0.735149	2.19173	0.728397	1.50391	-3.52928	-1.81937	0.189528	0.999997	1214	polycystic kidney and hepatic disease 1-like 1	192190	192190	Pkhd1l1
ENSMUSG00000022324	12.8929	6.62383	7.65427	4.41123	2.59094	1.37347	0.109196	0.999997	1215	matrilin 2	17181	17181	Matn2
ENSMUSG00000002688	8.61672	20.894	6.12525	7.2564	-2.68812	-1.4266	0.121034	0.999997	1216	protein kinase D1	18760	18760	Prkd1
ENSMUSG00000038668	1.98006	1.08248	0.555529	0.911183	2.52785	1.33791	0.0993726	0.999997	1217	lysophosphatidic acid receptor 1	14745	14745	Lpar1
ENSMUSG00000067158	0.0909541	0.0272039	0.0772715	0.0296586	3.64624	1.86641	0.195876	0.999997	1218	collagen, type IV, alpha 4	12829	12829	Col4a4
ENSMUSG00000031927	4.49616	1.89301	5.40088	2.35612	4.3881	2.1336	0.221913	0.999997	1219	RIKEN cDNA 1700012B09 gene	69325	69325	1700012B09Rik
ENSMUSG00000004952	39.2306	11.297	31.628	7.85309	3.34078	1.74018	0.179257	0.999997	1220	RAS p21 protein activator 4	54153	54153	Rasa4
ENSMUSG00000064280	0.0848849	0.474168	0.0769857	0.475983	-3.74764	-1.90598	0.200605	0.999997	1221	coiled-coil domain containing 146	75172	75172	Ccdc146
ENSMUSG00000037913	0.807032	0.289723	0.674608	0.294285	3.13068	1.64648	0.162939	0.999997	1222	transmembrane protein 156	243025	243025	Tmem156
ENSMUSG00000042388	0.345618	1.34548	0.360743	0.989101	-2.96018	-1.56568	0.150367	0.999997	1223	discs, large (Drosophila) homolog-associated protein 3	242667	242667	Dlgap3
ENSMUSG00000087411	1.9522	3.65806	2.02742	0.933106	-2.77438	-1.47216	0.131858	0.999997	1224	predicted gene 16048	NA		Gm16048
ENSMUSG00000070331	0.0274353	0.14589	0.02663	0.149105	-3.03777	-1.60301	0.156487	0.999997	1225	glutamine rich 2	217341	217341	Qrich2
ENSMUSG00000104917	0.692837	0.234705	0.0976128	0.14282	2.85803	1.51502	0.13993	0.999997	1226	predicted gene 43289	NA		Gm43289
ENSMUSG00000027792	1.02769	0.363009	0.420266	0.0984874	2.82135	1.49639	0.136437	0.999997	1227	butyrylcholinesterase	12038	12038	Bche
ENSMUSG00000028976	0.18468	0.0514612	0.127778	0.0138945	2.97141	1.57115	0.151686	0.999997	1228	solute carrier family 2 (facilitated glucose transporter), member 5	56485	56485	Slc2a5
ENSMUSG00000027338	0.429861	0.0648004	0.422786	0.112238	6.08453	2.60515	0.255083	0.999997	1229	prion protein dublet	26434	26434	Prnd
ENSMUSG00000113302	0.351713	0.112217	0.32376	0.114451	3.87123	1.95279	0.205279	0.999997	1230		NA		AC122354.1
ENSMUSG00000073413	1.86638	0.710801	0.962049	0.537761	2.73015	1.44898	0.128402	0.999997	1231	lymphocyte antigen 6 complex, locus G6D	114654	114654	Ly6g6d
ENSMUSG00000001240	70.229	194.935	37.2364	75.7423	-2.77978	-1.47497	0.132931	0.999997	1232	receptor (calcitonin) activity modifying protein 2	54409	54409	Ramp2
ENSMUSG00000035896	29.0168	9.57304	22.9103	10.6191	4.96495	2.31178	0.237741	0.999997	1233	ribonuclease, RNase A family, 1 (pancreatic)	19752	19752	Rnase1
ENSMUSG00000081121	1.15288	0.428678	0.364466	0.149859	2.53284	1.34076	0.103833	0.999997	1234	predicted gene 12791	NA		Gm12791
ENSMUSG00000089991	0.346563	0.209056	0.18067	0.306611	4.16304	2.05764	0.217608	0.999997	1235	predicted gene 16332	NA		Gm16332
ENSMUSG00000000489	281.917	114.355	179.204	136.392	3.51506	1.81355	0.192211	0.999997	1236	platelet derived growth factor, B polypeptide	18591	18591	Pdgfb
ENSMUSG00000105059	0.447828	1.55241	0.152249	0.520728	-2.79714	-1.48395	0.135277	0.999997	1237	predicted gene 42498	NA		Gm42498
ENSMUSG00000039323	0.865078	0.143788	1.07636	0.16162	5.31637	2.41044	0.244465	0.999997	1238	insulin-like growth factor binding protein 2	16008	16008	Igfbp2
ENSMUSG00000085962	1.29632	0.413421	0.944604	0.415757	3.13328	1.64768	0.165097	0.999997	1239	predicted gene, 16984	NA		Gm16984
ENSMUSG00000068263	6.8139	13.749	4.82869	7.05322	-2.5092	-1.32723	0.100522	0.999997	1240	EF hand and coiled-coil domain containing 1	58229	58229	Efcc1
ENSMUSG00000099796	3.65547	2.46606	4.74337	4.27134	4.07477	2.02672	0.214674	0.999997	1241	predicted gene 7893	NA		Gm7893
ENSMUSG00000033763	19.4215	52.264	2.64588	24.7219	-2.41233	-1.27043	0.0845051	0.999997	1242	metastasis suppressor 1-like	244654	244654	Mtss1l
ENSMUSG00000032118	31.1647	14.0272	11.4832	7.64462	2.54339	1.34675	0.106171	0.999997	1243	fasciculation and elongation protein zeta 1 (zygin I)	235180	235180	Fez1
ENSMUSG00000097779	0.348869	0.233529	0.363689	0.404483	3.51968	1.81544	0.193773	0.999997	1244	RIKEN cDNA 4833407H14 gene	NA		4833407H14Rik
ENSMUSG00000062151	0.323959	0.0617336	0.434414	0.0593093	5.27452	2.39904	0.245041	0.999997	1245	unc-13 homolog C (C. elegans)	208898	208898	Unc13c
ENSMUSG00000019577	20.7102	4.35853	19.605	2.71487	3.52944	1.81944	0.194442	0.999997	1246	pyruvate dehydrogenase kinase, isoenzyme 4	27273	27273	Pdk4
ENSMUSG00000057098	2.65248	8.96788	0.45056	8.20631	-2.59561	-1.37608	0.114749	0.999997	1247	early B cell factor 1	13591	13591	Ebf1
ENSMUSG00000050379	7.75127	27.4908	8.05109	21.2664	-4.07062	-2.02525	0.215802	0.999997	1248	septin 6	56526	56526	2006-09-01
ENSMUSG00000052373	1.05336	2.53206	0.607421	1.13924	-2.61962	-1.38936	0.118506	0.999997	1249	membrane protein, palmitoylated 3 (MAGUK p55 subfamily member 3)	13384	13384	Mpp3
ENSMUSG00000103653	8.09587	24.0361	1.82353	13.4366	-2.56531	-1.35913	0.111703	0.999997	1250	glutathione S-transferase, pi, pseudogene	NA		Gstp-ps
ENSMUSG00000021404	1.02275	0.178933	1.10592	0.213965	4.68936	2.22939	0.236371	0.999997	1251	serine (or cysteine) peptidase inhibitor, clade B, member 9c	20707	20707	Serpinb9c
ENSMUSG00000043969	0.378559	0.113341	0.365328	0.103053	3.35915	1.7481	0.187621	0.999997	1252	empty spiracles homeobox 2	13797	13797	Emx2
ENSMUSG00000035373	1707.64	856.519	1163.17	822.926	3.62728	1.85889	0.200141	0.999997	1253	chemokine (C-C motif) ligand 7	20306	20306	Ccl7
ENSMUSG00000086308	1.2647	2.03	1.56851	0.801884	-3.01289	-1.59115	0.159117	0.999997	1254	RIKEN cDNA G630016G05 gene	NA		G630016G05Rik
ENSMUSG00000031906	14.3281	5.60226	4.50073	4.47843	2.86652	1.5193	0.146539	0.999997	1255	sphingomyelin phosphodiesterase 3, neutral	58994	58994	Smpd3
ENSMUSG00000039476	1.90577	45.9879	0.939616	71.796	-6.05054	-2.59706	0.258798	0.999997	1256	paired related homeobox 2	20204	20204	Prrx2
ENSMUSG00000086049	1.1119	2.70048	0.593234	0.557325	-2.43211	-1.28221	0.0932467	0.999997	1257	predicted gene 12735	NA		Gm12735
ENSMUSG00000037166	2.66085	0.963252	1.19645	0.588144	3.04231	1.60517	0.162009	0.999997	1258	protein phosphatase 1, regulatory (inhibitor) subunit 14A	68458	68458	Ppp1r14a
ENSMUSG00000048905	0.295582	0.0453123	0.345518	0.0784832	5.25136	2.39269	0.24854	0.999997	1259	RIKEN cDNA 4930539E08 gene	207819	207819	4930539E08Rik
ENSMUSG00000000197	0.0631777	0.0487407	0.037527	0.0844213	3.2981	1.72164	0.185183	0.999997	1260	sodium leak channel, non-selective	338370	338370	Nalcn
ENSMUSG00000053216	1.30011	0.393347	0.620665	0.25151	3.27481	1.71141	0.183943	0.999997	1261	butyrophilin, subfamily 2, member A2	238555	238555	Btn2a2
ENSMUSG00000034656	2.13057	1.00396	0.360596	0.380213	2.38296	1.25275	0.0853127	0.999997	1262	calcium channel, voltage-dependent, P/Q type, alpha 1A subunit	12286	12286	Cacna1a
ENSMUSG00000080904	2.97993	8.64191	1.30757	1.31876	-2.81374	-1.49249	0.141505	0.999997	1263	predicted gene 11966	NA		Gm11966
ENSMUSG00000111065	0.0564853	0.375892	0.0556987	0.452857	-3.23141	-1.69217	0.179373	0.999997	1264		NA		AC158238.1
ENSMUSG00000076434	0.160444	0.688867	0.174345	0.814388	-3.2196	-1.68688	0.178644	0.999997	1265	WAP four-disulfide core domain 3	71856	71856	Wfdc3
ENSMUSG00000102383	0.0609907	0.253292	0.0644646	0.10334	-2.99047	-1.58037	0.158539	0.999997	1266	predicted gene, 38142	NA		Gm38142
ENSMUSG00000037681	0.0443164	0.208064	0.0122469	0.202195	-2.79197	-1.48128	0.140096	0.999997	1267	extended synaptotagmin-like protein 3	272636	272636	Esyt3
ENSMUSG00000043036	1.13299	2.13754	1.17731	0.64316	-2.8537	-1.51283	0.146105	0.999997	1268	coiled-coil domain containing 63	330188	330188	Ccdc63
ENSMUSG00000032548	4.71608	1.69079	4.51228	0.731452	3.03347	1.60097	0.162831	0.999997	1269	solute carrier organic anion transporter family, member 2a1	24059	24059	Slco2a1
ENSMUSG00000105347	0.317558	0.500943	0.272971	0.230708	-3.22788	-1.69059	0.180484	0.999997	1270	predicted gene 43503	NA		Gm43503
ENSMUSG00000027827	0.917687	0.410709	0.0383423	0.200089	2.5149	1.3305	0.10763	0.999997	1271	potassium voltage-gated channel, shaker-related subfamily, beta member 1	16497	16497	Kcnab1
ENSMUSG00000101587	1.26563	0.535575	0.493917	0.472779	3.5401	1.82379	0.198772	0.999997	1272	predicted gene 29036	NA		Gm29036
ENSMUSG00000043531	17.4741	45.2546	4.97331	15.7816	-2.37584	-1.24844	0.0848254	0.999997	1273	sortilin-related VPS10 domain containing receptor 1	58178	58178	Sorcs1
ENSMUSG00000073652	22.5785	13.4946	13.0841	12.9917	2.65164	1.40689	0.126896	0.999997	1274	apolipoprotein L 7d	NA		Apol7d
ENSMUSG00000081683	2.44036	9.70177	0.909161	6.98593	-3.0315	-1.60003	0.163577	0.999997	1275	frizzled class receptor 10	93897	93897	Fzd10
ENSMUSG00000028223	19.964	8.57762	7.70882	4.7819	2.65564	1.40906	0.127925	0.999997	1276	2,4-dienoyl CoA reductase 1, mitochondrial	67460	67460	Decr1
ENSMUSG00000029718	8.15317	2.97294	9.88426	2.84428	4.08225	2.02936	0.221635	0.999997	1277	procollagen C-endopeptidase enhancer protein	18542	18542	Pcolce
ENSMUSG00000054641	49.4144	313.569	42.9951	158.411	-19.1874	-4.26208	0.288351	0.999997	1278	multimerin 1	70945	70945	Mmrn1
ENSMUSG00000038903	5.73948	2.20475	4.88572	0.735601	2.92677	1.54931	0.156474	0.999997	1279	coiled-coil domain containing 68	381175	381175	Ccdc68
ENSMUSG00000113621	0.391464	0.788731	0.451884	0.153646	-3.18145	-1.66968	0.178334	0.999997	1280		NA		AC121804.3
ENSMUSG00000102196	3.49218	0.717235	3.44804	0.910227	4.59552	2.20023	0.238327	0.999997	1281	predicted gene, 38171	NA		Gm38171
ENSMUSG00000025384	4.72023	11.549	1.59222	4.26821	-2.3768	-1.24902	0.0871551	0.999997	1282	Fanconi anemia core complex associated protein 100	71885	71885	Faap100
ENSMUSG00000104045	1.63082	0.52879	0.32268	0.461162	3.2894	1.71782	0.188266	0.999997	1283	predicted gene, 37565	NA		Gm37565
ENSMUSG00000097254	0.451326	0.174488	0.196258	0.302222	3.15239	1.65645	0.177042	0.999997	1284	RIKEN cDNA C430042M11 gene	NA		C430042M11Rik
ENSMUSG00000031257	0.51794	0.147042	0.340384	0.10001	3.21008	1.68261	0.1829	0.999997	1285	NADPH oxidase 1	237038	237038	Nox1
ENSMUSG00000111097	0.185302	0.149672	0.320952	0.0615784	-3.6525	-1.86888	0.205044	0.999997	1286		NA		AC154264.1
ENSMUSG00000027636	3.44157	8.5548	2.64586	3.81481	-2.75866	-1.46397	0.140889	0.999997	1287	Src-like-adaptor 2	77799	77799	Sla2
ENSMUSG00000053475	4.83541	2.23234	1.02558	0.841117	2.38627	1.25476	0.0891126	0.999997	1288	tumor necrosis factor alpha induced protein 6	21930	21930	Tnfaip6
ENSMUSG00000045709	1.01922	0.585616	0.37432	0.658239	3.0899	1.62756	0.172854	0.999997	1289	smal lysine rich protein 1, pseudogene	NA		Smkr-ps
ENSMUSG00000112875	0.584809	1.18231	0.441144	0.241477	-2.68101	-1.42278	0.132169	0.999997	1290		NA		AC122197.2
ENSMUSG00000028558	0.549656	0.233398	0.292657	0.211548	3.06419	1.61551	0.171363	0.999997	1291	calreticulin 4	108802	108802	Calr4
ENSMUSG00000073119	1.65202	0.646025	0.433142	0.276388	2.55678	1.35433	0.1173	0.999997	1292	spermatogenesis associated glutamate (E)-rich protein 4A	75657	75657	Speer4a
ENSMUSG00000027356	0.115598	0.0435832	0.109063	0.0580901	3.31547	1.72921	0.191605	0.999997	1293	fermitin family member 1	241639	241639	Fermt1
ENSMUSG00000105861	0.858335	1.59084	0.556092	0.677973	-2.68306	-1.42388	0.13349	0.999997	1294	predicted gene 43508	NA		Gm43508
ENSMUSG00000045103	1.45652	0.393071	1.17638	0.36383	3.94015	1.97825	0.220012	0.999997	1295	dystrophin, muscular dystrophy	13405	13405	Dmd
ENSMUSG00000038576	17.527	56.561	8.67671	41.0078	-2.89947	-1.53579	0.156339	0.999997	1296	sushi domain containing 4	96935	96935	Susd4
ENSMUSG00000019779	3.47288	1.85074	0.74042	1.31761	2.72874	1.44823	0.139503	0.999997	1297	fyn-related kinase	14302	14302	Frk
ENSMUSG00000035183	6.21301	2.61093	0.410231	1.10899	2.56513	1.35903	0.119895	0.999997	1298	solute carrier family 24, member 5	317750	317750	Slc24a5
ENSMUSG00000020334	8.24563	23.8902	2.39919	8.538	-2.65741	-1.41002	0.131984	0.999997	1299	solute carrier family 22 (organic cation transporter), member 4	30805	30805	Slc22a4
ENSMUSG00000111465	0.0341491	0.108409	0.0129244	0.0591045	-2.56518	-1.35906	0.120167	0.999997	1300		NA		AC165080.4
ENSMUSG00000087632	1.36807	0.365964	0.331178	0.322049	2.69432	1.42992	0.136139	0.999997	1301	predicted gene 6058	NA		Gm6058
ENSMUSG00000030905	0.660967	0.165019	0.716877	0.142926	3.3525	1.74524	0.194989	0.999997	1302	crystallin, mu	12971	12971	Crym
ENSMUSG00000040829	6.27008	2.35921	3.79395	1.5833	2.90583	1.53895	0.157519	0.999997	1303	zinc finger, MYND-type containing 15	574428	574428	Zmynd15
ENSMUSG00000086095	0.0774621	0	0.134168	0	3.75623	1.90928	0.214226	0.999997	1304	predicted gene 15328	NA		Gm15328
ENSMUSG00000040592	0.0584507	0.524028	0.0696151	0.637725	-3.63583	-1.86228	0.207463	0.999997	1305	CD79B antigen	15985	15985	Cd79b
ENSMUSG00000049436	1.13805	0.33723	1.40561	0.398143	5.34921	2.41932	0.25788	0.999997	1306	uroplakin 1B	22268	22268	Upk1b
ENSMUSG00000031385	0.545143	1.23161	0.464561	0.2435	-3.11124	-1.63749	0.177192	0.999997	1307	plexin B3	140571	140571	Plxnb3
ENSMUSG00000038543	24.6899	53.3163	9.33538	11.1357	-2.2598	-1.1762	0.0632846	0.999997	1308	cDNA sequence BC028528	229600	229600	BC028528
ENSMUSG00000085457	3.43416	1.53446	1.23515	0.561616	2.42872	1.2802	0.102072	0.999997	1309	RIKEN cDNA 1110046J04 gene	NA		1110046J04Rik
ENSMUSG00000105264	1.33991	2.50065	1.54432	0.859942	-3.12015	-1.64162	0.17842	0.999997	1310	predicted gene 42716	NA		Gm42716
ENSMUSG00000022269	0.782073	2.83465	0.621588	1.31806	-3.88463	-1.95778	0.220424	0.999997	1311	membrane-associated ring finger (C3HC4) 11	211147	211147	2011-03-01
ENSMUSG00000103049	0.185481	0.476908	0.216547	0.445305	-3.43508	-1.78034	0.200461	0.999997	1312	predicted gene, 37311	NA		Gm37311
ENSMUSG00000042156	20.2276	9.93247	1.72766	6.39909	2.48698	1.31439	0.111133	0.999997	1313	DAZ interacting protein 1	66573	66573	Dzip1
ENSMUSG00000014813	200.689	456.788	310.522	458.298	-5.50454	-2.46062	0.261146	0.999997	1314	stanniocalcin 1	20855	20855	Stc1
ENSMUSG00000026062	19.2507	13.4455	18.3042	18.5656	3.62431	1.85771	0.209161	0.999997	1315	solute carrier family 9 (sodium/hydrogen exchanger), member 2	226999	226999	Slc9a2
ENSMUSG00000063296	1.90731	10.4447	0.552414	11.5209	-3.04593	-1.60688	0.17424	0.999997	1316	transmembrane protein 117	320709	320709	Tmem117
ENSMUSG00000089796	0.122474	0.467986	0.123714	0.0897345	-2.99707	-1.58355	0.170157	0.999997	1317	predicted gene 16575	NA		Gm16575
ENSMUSG00000019647	32.7747	74.4353	30.4445	16.2816	-2.84368	-1.50776	0.154455	0.999997	1318	sema domain, transmembrane domain (TM), and cytoplasmic domain, (semaphorin) 6A	20358	20358	Sema6a
ENSMUSG00000046818	29.0266	13.9753	2.02897	7.51023	2.29866	1.20079	0.0771011	0.999997	1319	DNA-damage-inducible transcript 4-like	73284	73284	Ddit4l
ENSMUSG00000021118	0.422196	0.145663	0.159198	0.153269	2.82203	1.49673	0.153417	0.999997	1320	pleckstrin 2	27260	27260	Plek2
ENSMUSG00000086503	76.2252	128.885	131.963	114.481	-34.4362	-5.10585	0.300166	0.999997	1321	inactive X specific transcripts	NA		Xist
ENSMUSG00000039982	3.64608	1.00588	3.19787	0.593616	3.82024	1.93366	0.219612	0.999997	1322	deltex 4, E3 ubiquitin ligase	207521	207521	Dtx4
ENSMUSG00000055780	0	2.06413	0	3.57517	-6.57837	-2.71773	0.27508	0.999997	1323	ubiquitin specific peptidase 26	83563	83563	Usp26
ENSMUSG00000021796	4.37655	1.75766	4.59028	1.49016	3.38107	1.75748	0.199951	0.999997	1324	bone morphogenetic protein receptor, type 1A	12166	12166	Bmpr1a
ENSMUSG00000112805	0.360411	1.3079	0.414866	1.51338	-3.34432	-1.74171	0.198454	0.999997	1325		NA		AC153504.2
ENSMUSG00000039518	1.97344	0.8695	2.5547	1.19909	3.93228	1.97537	0.225394	0.999997	1326	corneodesmosin	386463	386463	Cdsn
ENSMUSG00000110895	0.222199	0.606041	0.0691723	0.143091	-2.68499	-1.42491	0.140447	0.999997	1327		NA		AC123832.1
ENSMUSG00000104496	0.247845	0.725848	0.301632	0.370491	-2.76151	-1.46546	0.149502	0.999997	1328	predicted gene 5837	NA		Gm5837
ENSMUSG00000026188	0.139923	0.402374	0.0116559	0.157973	-2.41544	-1.27229	0.102565	0.999997	1329	transmembrane protein 169	271711	271711	Tmem169
ENSMUSG00000113880	2.70897	1.05981	0.655782	0.432022	2.42315	1.27688	0.104152	0.999997	1330		NA		AC125444.3
ENSMUSG00000097640	1.00029	2.42675	0.477819	0.848355	-2.48171	-1.31133	0.113494	0.999997	1331	predicted gene, 20033	NA		Gm20033
ENSMUSG00000005087	30.2343	12.0339	18.7083	7.98689	2.87428	1.5232	0.160775	0.999997	1332	CD44 antigen	12505	12505	Cd44
ENSMUSG00000025128	0.374221	0.124446	0.359477	0.215547	5.44868	2.44591	0.262967	0.999997	1333	basic helix-loop-helix family, member e22	59058	59058	Bhlhe22
ENSMUSG00000027015	0.128597	0.0725036	0.0146564	0.106569	2.9265	1.54918	0.165502	0.999997	1334	cytochrome b reductase 1	73649	73649	Cybrd1
ENSMUSG00000037254	2.37527	0.605058	3.04261	0.267767	3.30355	1.72402	0.197234	0.999997	1335	inter-alpha trypsin inhibitor, heavy chain 2	16425	16425	Itih2
ENSMUSG00000000248	0.0256208	0.123465	0.0443765	0.154925	-3.71762	-1.89438	0.217686	0.999997	1336	C-type lectin domain family 2, member g	70809	70809	Clec2g
ENSMUSG00000039620	0.583599	2.19606	0.180371	2.00658	-2.88632	-1.52923	0.162513	0.999997	1337	RIKEN cDNA 6430573F11 gene	319582	319582	6430573F11Rik
ENSMUSG00000099703	1.7638	0.511181	1.17948	0.0561821	2.55609	1.35394	0.125565	0.999997	1338	predicted gene 28285	NA		Gm28285
ENSMUSG00000079564	0.146754	0.0433759	0.151947	0.0751292	3.47038	1.79509	0.204841	0.999997	1339	predicted gene 11149	NA		Gm11149
ENSMUSG00000107760	0.232496	0.101827	0.1346	0.17637	3.00228	1.58606	0.174758	0.999997	1340	predicted gene, 44401	NA		Gm44401
ENSMUSG00000059588	164.698	471.479	160.921	318.409	-3.01169	-1.59058	0.175802	0.999997	1341	calcitonin receptor-like	54598	54598	Calcrl
ENSMUSG00000089806	0.948312	2.20934	0.917729	0.68115	-2.96902	-1.56998	0.171796	0.999997	1342	predicted gene 16570	NA		Gm16570
ENSMUSG00000020205	64.6281	26.1596	24.8491	8.96817	2.59201	1.37407	0.131534	0.999997	1343	pleckstrin homology like domain, family A, member 1	21664	21664	Phlda1
ENSMUSG00000032691	0.250035	0.0838673	0.040993	0.0762543	3.43436	1.78004	0.204287	0.999997	1344	NLR family, pyrin domain containing 3	216799	216799	Nlrp3
ENSMUSG00000051590	0.108538	0.0994278	0.0164138	0.172214	3.32487	1.7333	0.199553	0.999997	1345	mitogen-activated protein kinase kinase kinase 19	22625	22625	Map3k19
ENSMUSG00000080928	1.09207	0.277791	0.623443	0.326262	2.92615	1.54901	0.168541	0.999997	1346	high mobility group box 1, pseudogene 6	NA		Hmgb1-ps6
ENSMUSG00000015850	8.72562	23.7385	1.07868	9.02995	-2.42654	-1.2789	0.107649	0.999997	1347	ADAMTS-like 4	229595	229595	Adamtsl4
ENSMUSG00000097692	0.12318	0.376675	0.0250469	0.0430038	-2.46098	-1.29923	0.113435	0.999997	1348	RIKEN cDNA A230060F14 gene	NA		A230060F14Rik
ENSMUSG00000005465	6.00752	15.6737	4.45207	8.7991	-2.72447	-1.44597	0.148149	0.999997	1349	interleukin 27 receptor, alpha	50931	50931	Il27ra
ENSMUSG00000018796	5.45963	14.4024	1.75027	9.31693	-2.41557	-1.27236	0.106071	0.999997	1350	acyl-CoA synthetase long-chain family member 1	14081	14081	Acsl1
ENSMUSG00000083679	0	0.802478	0	1.23603	-4.89067	-2.29003	0.257355	0.999997	1351	predicted gene 12892	NA		Gm12892
ENSMUSG00000028519	0.0208536	0.121134	0.0300861	0.108785	-4.16608	-2.05869	0.237711	0.999997	1352	disabled 1	13131	13131	Dab1
ENSMUSG00000081787	0.743866	1.93204	0.685727	0.118001	-3.05332	-1.61038	0.182685	0.999997	1353	predicted gene 13991	NA		Gm13991
ENSMUSG00000021974	0.0590045	0.340402	0.0186533	0.383013	-2.94752	-1.5595	0.172568	0.999997	1354	fibroblast growth factor 9	14180	14180	Fgf9
ENSMUSG00000036790	0.115734	0.0676931	0.0220957	0.0790105	3.27016	1.70936	0.198299	0.999997	1355	SLIT and NTRK-like family, member 2	245450	245450	Slitrk2
ENSMUSG00000110618	1.13751	0.329776	0.64013	0.264648	3.16376	1.66164	0.190879	0.999997	1356	predicted gene 45818	NA		Gm45818
ENSMUSG00000082383	1.22224	3.72544	0.148664	2.13161	-2.44238	-1.28829	0.111715	0.999997	1357	predicted gene 9670	NA		Gm9670
ENSMUSG00000106262	0.518049	1.27473	0.331401	0.579014	-2.48575	-1.31368	0.119124	0.999997	1358	predicted gene 43375	NA		Gm43375
ENSMUSG00000020062	0.53575	0.247227	0.0798156	0.127139	2.42452	1.2777	0.109127	0.999997	1359	solute carrier family 5 (iodide transporter), member 8	216225	216225	Slc5a8
ENSMUSG00000063531	9.278	3.63935	5.14327	1.74173	2.75391	1.46148	0.154012	0.999997	1360	sema domain, immunoglobulin domain (Ig), short basic domain, secreted, (semaphorin) 3E	20349	20349	Sema3e
ENSMUSG00000034648	0.23945	0.0296391	0.235852	0.0282412	3.77664	1.9171	0.224875	0.999997	1361	leucine rich repeat protein 1, neuronal	16979	16979	Lrrn1
ENSMUSG00000042589	0.0294887	0.0966601	0.00843754	0.0485588	-2.71938	-1.44328	0.150959	0.999997	1362	cut-like homeobox 2	13048	13048	Cux2
ENSMUSG00000022099	57.0139	144.502	22.4883	48.427	-2.46271	-1.30025	0.116991	0.999997	1363	dematin actin binding protein	13829	13829	Dmtn
ENSMUSG00000038932	0.225863	0.0876285	0.216965	0.151777	4.07707	2.02753	0.237046	0.999997	1364	transcription factor-like 5 (basic helix-loop-helix)	277353	277353	Tcfl5
ENSMUSG00000024810	0.690606	1.9442	0.371583	0.693649	-2.55715	-1.35454	0.131712	0.999997	1365	interleukin 33	77125	77125	Il33
ENSMUSG00000104342	0.419082	1.12947	0.432157	1.04013	-3.00175	-1.5858	0.181168	0.999997	1366	predicted gene, 36401	NA		Gm36401
ENSMUSG00000072962	0.992565	2.21166	0.398047	0.0568383	-2.48465	-1.31304	0.121568	0.999997	1367	predicted gene 16401	NA		Gm16401
ENSMUSG00000113726	0.332221	0.0771502	0.485057	0.133628	3.82647	1.93601	0.228389	0.999997	1368		NA		AL589871.1
ENSMUSG00000110790	0.717067	0.305206	0.193727	0.220833	2.63677	1.39877	0.144132	0.999997	1369		NA		AC159314.1
ENSMUSG00000109704	6.0948	2.88348	1.01177	1.35966	2.30204	1.20291	0.0900418	0.999997	1370	predicted gene 45568	NA		Gm45568
ENSMUSG00000100158	19.7245	7.66431	11.2295	3.70548	2.50001	1.32194	0.124826	0.999997	1371	predicted gene 28119	NA		Gm28119
ENSMUSG00000028051	0.134742	0.0597931	0.0718987	0.0796956	2.80147	1.48619	0.16119	0.999997	1372	hyperpolarization-activated, cyclic nucleotide-gated K+ 3	15168	15168	Hcn3
ENSMUSG00000107768	6.14206	1.90172	4.35568	0.972462	3.11412	1.63882	0.191575	0.999997	1373	predicted gene, 44275	NA		Gm44275
ENSMUSG00000065259	5.66242	2.7542	1.5865	3.29341	2.93183	1.5518	0.176557	0.999997	1374	small nucleolar RNA, H/ACA box 30	NA		Snora30
ENSMUSG00000100975	15.1665	47.3748	11.4131	44.5005	-2.88173	-1.52693	0.172144	0.999997	1375	predicted gene 28875	NA		Gm28875
ENSMUSG00000022886	3.27373	1.53564	3.49402	1.73246	3.07067	1.61855	0.188852	0.999997	1376	prolactin family 2, subfamily a, member 1	56635	56635	Prl2a1
ENSMUSG00000107682	1.20611	0.940238	0.527935	1.46622	2.95257	1.56197	0.178178	0.999997	1377	predicted gene, 43918	NA		Gm43918
ENSMUSG00000111409	0.228029	0.0726645	0.0582987	0.00798631	2.41906	1.27445	0.113295	0.999997	1378	ring finger protein 26	NA		Rnf26
ENSMUSG00000101859	22.9473	7.44269	17.8582	9.58805	4.39035	2.13434	0.250511	0.999997	1379	predicted gene 29233	NA		Gm29233
ENSMUSG00000022012	0.236029	0.099443	0.0736097	0.126766	2.72684	1.44723	0.1549	0.999997	1380	ecto-NOX disulfide-thiol exchanger 1	239188	239188	Enox1
ENSMUSG00000081524	1.43149	0.646278	0.370528	0.660197	2.87309	1.5226	0.172743	0.999997	1381	predicted gene 11658	NA		Gm11658
ENSMUSG00000041617	0.553822	0.197424	0.333332	0.13043	2.63368	1.39708	0.145721	0.999997	1382	coiled-coil domain containing 74A	72315	72315	Ccdc74a
ENSMUSG00000018411	0.371815	2.34853	0.178584	3.04377	-3.01367	-1.59152	0.186187	0.999997	1383	microtubule-associated protein tau	17762	17762	Mapt
ENSMUSG00000022416	0.237798	0.539874	0.187023	0.142729	-2.57132	-1.36251	0.13933	0.999997	1384	calcium channel, voltage-dependent, alpha 1I subunit	239556	239556	Cacna1i
ENSMUSG00000021760	169.602	88.848	65.7527	74.7588	2.673	1.41846	0.152093	0.999997	1385	glutathione peroxidase 8 (putative)	69590	69590	Gpx8
ENSMUSG00000097323	0.254197	0.574341	0.141359	0.229626	-2.62732	-1.39359	0.145812	0.999997	1386	RIKEN cDNA 4930426I24 gene	NA		4930426I24Rik
ENSMUSG00000107365	3.38263	1.07161	2.08605	0.878528	2.72762	1.44764	0.15719	0.999997	1387	predicted gene 43479	NA		Gm43479
ENSMUSG00000039209	0.156461	0.707618	0.138493	0.456852	-3.23278	-1.69278	0.20266	0.999997	1388	ribosomal protein L39-like	68172	68172	Rpl39l
ENSMUSG00000056602	13.4149	30.9908	13.8315	12.0637	-3.00025	-1.58508	0.1862	0.999997	1389	FRY microtubule binding protein	320365	320365	Fry
ENSMUSG00000090958	277.1	636.292	256.348	11.8276	-2.8596	-1.51581	0.17256	0.999997	1390	leucine rich repeat containing 32	434215	434215	Lrrc32
ENSMUSG00000066750	0.237561	0.0785653	0.0815055	0.0521516	3.01608	1.59268	0.188821	0.999997	1391	olfactory receptor 876	258883	258883	Olfr876
ENSMUSG00000056071	1.83544	0.806251	0.632672	0.810805	2.85558	1.51379	0.172015	0.999997	1392	S100 calcium binding protein A9 (calgranulin B)	20202	20202	S100a9
ENSMUSG00000034818	1.49526	0.554854	0.803417	0.107545	2.53609	1.34261	0.133888	0.999997	1393	CUGBP, Elav-like family member 5	319586	319586	Celf5
ENSMUSG00000002111	0.085168	0.189747	0.0715328	0.0689572	-2.97491	-1.57284	0.184994	0.999997	1394	spleen focus forming virus (SFFV) proviral integration oncogene	20375	20375	Spi1
ENSMUSG00000039683	2.17166	1.18563	1.45498	0.940061	2.64076	1.40095	0.150652	0.999997	1395	sidekick cell adhesion molecule 1	330222	330222	Sdk1
ENSMUSG00000038146	2.10291	0.830972	0.975907	0.307935	3.03659	1.60245	0.190356	0.999997	1396	notch 3	18131	18131	Notch3
ENSMUSG00000026986	1.28046	0.355532	0.735487	0.312741	3.5373	1.82265	0.221374	0.999997	1397	histamine N-methyltransferase	140483	140483	Hnmt
ENSMUSG00000001021	0.376648	0.144039	0.227406	0.0958858	2.78201	1.47613	0.16504	0.999997	1398	S100 calcium binding protein A3	20197	20197	S100a3
ENSMUSG00000022817	16.8142	7.23567	13.689	5.30155	3.65753	1.87087	0.227676	0.999997	1399	integrin beta 5	16419	16419	Itgb5
ENSMUSG00000024304	19.2473	9.03153	14.0875	7.92133	2.72027	1.44375	0.158141	0.999997	1400	cadherin 2	12558	12558	Cdh2
ENSMUSG00000097452	0.133496	0.135181	0.231223	0.162859	-4.09235	-2.03293	0.244871	0.999997	1401	predicted gene 2824	NA		Gm2824
ENSMUSG00000104235	0.19811	0.482858	0.128686	0.289903	-2.86135	-1.51669	0.174467	0.999997	1402	predicted gene, 37589	NA		Gm37589
ENSMUSG00000027848	0.58049	0.248238	0.088143	0.0784866	2.34935	1.23226	0.105948	0.999997	1403	olfactomedin-like 3	99543	99543	Olfml3
ENSMUSG00000038057	1.01934	0.457103	0.435652	0.513789	2.99091	1.58058	0.187952	0.999997	1404	diazepam binding inhibitor-like 5	13168	13168	Dbil5
ENSMUSG00000073130	0.710445	0.262831	0.171983	0.00772855	2.35805	1.2376	0.107005	0.999997	1405	predicted gene 1141	NA		Gm1141
ENSMUSG00000044258	4199.04	2253.6	544.355	1632.53	2.82572	1.49862	0.171217	0.999997	1406	cytotoxic T lymphocyte-associated protein 2 alpha	13024	13024	Ctla2a
ENSMUSG00000072492	0.813428	0.295039	0.332649	0.38342	2.87011	1.52111	0.176759	0.999997	1407	predicted pseudogene 10364	NA		Gm10364
ENSMUSG00000019997	1328.37	421.414	956.594	456.114	3.46145	1.79138	0.218918	0.999997	1408	connective tissue growth factor	14219	14219	Ctgf
ENSMUSG00000054855	115.494	50.705	47.8635	31.9803	2.57182	1.36279	0.143324	0.999997	1409	Rho family GTPase 1	223881	223881	Rnd1
ENSMUSG00000047819	0.122047	0.0401029	0.106746	0.0694603	3.23543	1.69396	0.205111	0.999997	1410	tigger transposable element derived 4	403175	403175	Tigd4
ENSMUSG00000029503	2.77489	8.72517	1.7244	5.00289	-3.43128	-1.77875	0.218561	0.999997	1411	purinergic receptor P2X, ligand-gated ion channel, 2	231602	231602	P2rx2
ENSMUSG00000037379	0.314077	0.137188	0.158678	0.118961	3.84803	1.94412	0.23833	0.999997	1412	spondin 2, extracellular matrix protein	100689	100689	Spon2
ENSMUSG00000070473	4.55119	0.411366	6.8439	0.375212	5.73804	2.52056	0.283832	0.999997	1413	claudin 3	12739	12739	Cldn3
ENSMUSG00000004655	358.868	650.121	552.59	366.644	-4.98916	-2.3188	0.272171	0.999997	1414	aquaporin 1	11826	11826	Aqp1
ENSMUSG00000032334	8.43829	3.76281	9.90437	3.56511	4.55913	2.18876	0.260831	0.999997	1415	lysyl oxidase-like 1	16949	16949	Loxl1
ENSMUSG00000024912	76.1825	42.6855	19.0895	31.7519	2.63177	1.39603	0.152426	0.999997	1416	fos-like antigen 1	14283	14283	Fosl1
ENSMUSG00000038602	12.8558	3.87362	11.8751	3.90749	3.57658	1.83858	0.22714	0.999997	1417	solute carrier family 35, member F1	215085	215085	Slc35f1
ENSMUSG00000102191	0.887655	0.238948	0.840454	0.251425	3.47653	1.79765	0.222157	0.999997	1418	predicted gene, 36569	NA		Gm36569
ENSMUSG00000038155	0.683631	4.46423	0.747945	5.84419	-3.59323	-1.84528	0.227852	0.999997	1419	glutathione S-transferase, pi 2	14869	14869	Gstp2
ENSMUSG00000047246	2.332	1.10069	0.81823	0.502363	2.37551	1.24823	0.114883	0.999997	1420	histone cluster 1, H2be	319179	319179	Hist1h2be
ENSMUSG00000019772	2.01325	0.825118	0.880802	0.348292	2.5448	1.34755	0.140748	0.999997	1421	vasoactive intestinal polypeptide	22353	22353	Vip
ENSMUSG00000111605	2.52378	3.91946	2.77351	1.52607	-2.75155	-1.46025	0.166018	0.999997	1422		NA		AC120394.3
ENSMUSG00000014773	3.0176	6.70466	3.02366	3.96563	-2.83014	-1.50087	0.174788	0.999997	1423	delta-like 1 (Drosophila)	13388	13388	Dll1
ENSMUSG00000031538	192.047	455.228	217.781	170.462	-3.7783	-1.91774	0.237343	0.999997	1424	plasminogen activator, tissue	18791	18791	Plat
ENSMUSG00000029563	5.61307	11.1557	3.93522	1.90408	-2.43331	-1.28292	0.125564	0.999997	1425	forkhead box P2	114142	114142	Foxp2
ENSMUSG00000021347	0.827935	0.355669	0.349738	0.338895	2.86657	1.51932	0.179056	0.999997	1426	prolactin family 7, subfamily b, member 1	75596	75596	Prl7b1
ENSMUSG00000004626	31.2431	15.7942	9.33876	16.1172	2.89309	1.53261	0.183826	0.999997	1427	syntaxin binding protein 2	20911	20911	Stxbp2
ENSMUSG00000027478	4.62907	12.0626	1.63438	8.42231	-2.42579	-1.27846	0.123823	0.999997	1428	DNA methyltransferase 3B	13436	13436	Dnmt3b
ENSMUSG00000085196	0.575565	0.18314	0.40434	0.253694	3.12115	1.64208	0.200763	0.999997	1429	predicted gene 14963	NA		Gm14963
ENSMUSG00000032315	1.7966	10.3925	0.847987	14.1184	-3.2931	-1.71944	0.213421	0.999997	1430	cytochrome P450, family 1, subfamily a, polypeptide 1	13076	13076	Cyp1a1
ENSMUSG00000049281	77.8346	20.7764	71.193	3.23003	3.07221	1.61928	0.197848	0.999997	1431	sodium channel, voltage-gated, type III, beta	235281	235281	Scn3b
ENSMUSG00000044364	0.260207	0.0411503	0.296309	0.0712744	3.4137	1.77133	0.220846	0.999997	1432	transmembrane protein 74B	108832	108832	Tmem74b
ENSMUSG00000051457	0.369127	0.162305	0.186572	0.0710428	2.41415	1.27152	0.122026	0.999997	1433	sialophorin	20737	20737	Spn
ENSMUSG00000030806	1.78247	3.04234	2.10256	0.607153	-2.92159	-1.54676	0.186877	0.999997	1434	syntaxin 1B	56216	56216	Stx1b
ENSMUSG00000108929	0.0791082	0.20353	0.0720548	0.11771	-2.90981	-1.54093	0.185579	0.999997	1435	coiled-coil and C2 domain containing 2B	NA		Cc2d2b
ENSMUSG00000105975	0.229665	0.0380445	0.247795	0.0332247	3.63733	1.86288	0.231947	0.999997	1436	predicted gene 42609	NA		Gm42609
ENSMUSG00000050558	1.80794	0.970307	0.748985	0.704529	2.62538	1.39253	0.154663	0.999997	1437	prokineticin receptor 2	246313	246313	Prokr2
ENSMUSG00000049985	0.18496	0.0376752	0.189855	0.0326698	3.20898	1.68212	0.208084	0.999997	1438	ankyrin repeat domain 55	77318	77318	Ankrd55
ENSMUSG00000097858	1.06556	1.95695	1.03792	0.288354	-2.93723	-1.55446	0.189666	0.999997	1439	RIKEN cDNA 9530052C20 gene	NA		9530052C20Rik
ENSMUSG00000031375	192.805	57.5745	144.789	40.9436	3.15111	1.65586	0.204268	0.999997	1440	biglycan	12111	12111	Bgn
ENSMUSG00000029334	1.45435	0.510389	1.28545	0.266355	3.20917	1.6822	0.208484	0.999997	1441	protein kinase, cGMP-dependent, type II	19092	19092	Prkg2
ENSMUSG00000060568	6.07076	3.21182	3.119	2.21341	2.52826	1.33815	0.14127	0.999997	1442	family with sequence similarity 78, member B	226610	226610	Fam78b
ENSMUSG00000022218	0.172346	0.0679049	0.179667	0.069257	3.16632	1.66281	0.205898	0.999997	1443	transglutaminase 1, K polypeptide	21816	21816	Tgm1
ENSMUSG00000098138	0.703611	0.273352	0.268434	0.309946	2.65464	1.40851	0.159865	0.999997	1444	predicted gene 9081	NA		Gm9081
ENSMUSG00000032131	0.145063	0.0783428	0.0984279	0.0799027	3.0896	1.62742	0.201984	0.999997	1445	ATP-binding cassette, sub-family G (WHITE), member 4	192663	192663	Abcg4
ENSMUSG00000022831	64.6707	34.7893	7.09296	27.4108	2.7165	1.44175	0.167251	0.999997	1446	hematopoietic cell specific Lyn substrate 1	15163	15163	Hcls1
ENSMUSG00000080896	2.91141	8.6795	2.08128	2.27336	-2.43126	-1.2817	0.129375	0.999997	1447	predicted gene 14567	NA		Gm14567
ENSMUSG00000105651	1.8701	0.516496	3.06224	0.894597	4.8707	2.28413	0.274963	0.999997	1448	predicted gene 43003	NA		Gm43003
ENSMUSG00000021301	0.510133	0.100134	0.769439	0.0953184	4.74133	2.24529	0.273431	0.999997	1449	HECT, C2 and WW domain containing E3 ubiquitin protein ligase 1	94253	94253	Hecw1
ENSMUSG00000086006	0.228499	0.0429461	0.297929	0.0743849	3.3983	1.76481	0.223051	0.999997	1450	predicted gene 13293	NA		Gm13293
ENSMUSG00000070425	0.0633786	0.177361	0.0454309	0.067972	-2.73051	-1.44917	0.17136	0.999997	1451	Xndc1-transient receptor potential cation channel, subfamily C, member 2 readthrough	102443351	102443351	Xntrpc
ENSMUSG00000086593	3.95315	1.39571	2.91464	0.961023	2.6842	1.42449	0.164811	0.999997	1452	predicted gene 16548	NA		Gm16548
ENSMUSG00000028970	29.4501	13.5067	8.00035	6.10514	2.40143	1.26389	0.125063	0.999997	1453	ATP-binding cassette, sub-family B (MDR/TAP), member 1B	18669	18669	Abcb1b
ENSMUSG00000081378	0.610262	1.78355	0.208077	0.836981	-2.53456	-1.34174	0.145845	0.999997	1454	ribosomal protein S13, pseudogene 4	NA		Rps13-ps4
ENSMUSG00000064115	0.83821	0.350086	0.454019	0.226449	2.42614	1.27866	0.129232	0.999997	1455	cell adhesion molecule 2	239857	239857	Cadm2
ENSMUSG00000040009	0.814306	2.6854	0.519832	0.798214	-3.22673	-1.69007	0.21419	0.999997	1456	guanine nucleotide binding protein, alpha z subunit	14687	14687	Gnaz
ENSMUSG00000041696	0.245138	0.0450656	0.344857	0.0247643	3.40885	1.76929	0.225001	0.999997	1457	RAS-like, family 12	70784	70784	Rasl12
ENSMUSG00000029359	0.340338	3.9283	0.141093	5.89023	-3.42822	-1.77746	0.226682	0.999997	1458	tescalcin	57816	57816	Tesc
ENSMUSG00000031803	20.6012	8.85567	8.65377	7.84842	3.08406	1.62483	0.203759	0.999997	1459	UDP-GlcNAc:betaGal beta-1,3-N-acetylglucosaminyltransferase 3	72297	72297	B3gnt3
ENSMUSG00000028631	1.33204	0.676176	1.05568	0.946664	4.5896	2.19837	0.270837	0.999997	1460	potassium voltage-gated channel, subfamily Q, member 4	60613	60613	Kcnq4
ENSMUSG00000055022	0.559268	0.315909	0.355399	0.342741	2.88409	1.52812	0.189453	0.999997	1461	contactin 1	12805	12805	Cntn1
ENSMUSG00000022840	0.149511	0.0609966	0.181745	0.0776998	3.17157	1.6652	0.21047	0.999997	1462	adenylate cyclase 5	224129	224129	Adcy5
ENSMUSG00000049929	23.1753	4.73594	24.3098	2.7129	3.68151	1.8803	0.240218	0.999997	1463	lysophosphatidic acid receptor 4	78134	78134	Lpar4
ENSMUSG00000069378	1.05192	0.187568	1.63361	0.180202	5.70376	2.51191	0.293926	0.999997	1464	PR domain containing 6	225518	225518	Prdm6
ENSMUSG00000090124	1.14041	0.507536	0.705675	0.257768	2.42922	1.28049	0.131625	0.999997	1465	UDP glucuronosyltransferase 1 family, polypeptide A7C	394432	394432	Ugt1a7c
ENSMUSG00000059493	1.40977	0.45985	0.905803	0.233018	3.17027	1.66461	0.211348	0.999997	1466	NHS actin remodeling regulator	195727	195727	Nhs
ENSMUSG00000032177	6.39281	3.14883	0.817287	2.21466	2.44923	1.29233	0.135408	0.999997	1467	phosphodiesterase 4A, cAMP specific	18577	18577	Pde4a
ENSMUSG00000028370	2.80483	11.2766	1.40037	9.69319	-2.88534	-1.52874	0.191332	0.999997	1468	pregnancy-associated plasma protein A	18491	18491	Pappa
ENSMUSG00000105282	2.81348	4.09291	2.83317	1.51246	-2.75715	-1.46318	0.178028	0.999997	1469	predicted gene 42981	NA		Gm42981
ENSMUSG00000043753	0.160488	0.0496123	0.143724	0.085931	3.87807	1.95534	0.25081	0.999997	1470	doublesex and mab-3 related transcription factor like family A1	242523	242523	Dmrta1
ENSMUSG00000026786	11.1915	5.00809	2.35337	1.93823	2.41028	1.2692	0.129566	0.999997	1471	amyloid beta (A4) precursor protein-binding, family B, member 1 interacting protein	54519	54519	Apbb1ip
ENSMUSG00000016262	1.03664	0.211403	0.68588	0.0977689	4.29686	2.10328	0.265159	0.999997	1472	SERTA domain containing 4	214791	214791	Sertad4
ENSMUSG00000049649	0.587201	0.361003	0.234344	0.343977	2.92182	1.54687	0.195048	0.999997	1473	G-protein coupled receptor 3	14748	14748	Gpr3
ENSMUSG00000030499	0.687457	0.412127	0.579619	0.434351	3.45691	1.78948	0.230869	0.999997	1474	potassium channel tetramerisation domain containing 15	233107	233107	Kctd15
ENSMUSG00000008153	0.0893668	0.448297	0.0881223	0.538166	-3.53973	-1.82364	0.236128	0.999997	1475	calsyntenin 3	232370	232370	Clstn3
ENSMUSG00000097572	2.00189	4.01758	1.60198	1.878	-2.55439	-1.35298	0.153171	0.999997	1476	predicted gene, 26797	NA		Gm26797
ENSMUSG00000022203	1.40035	0.453969	1.94948	0.400527	5.77062	2.52873	0.298902	0.999997	1477	embryonal Fyn-associated substrate	13644	13644	Efs
ENSMUSG00000084875	8.11802	3.5053	5.22924	3.73342	3.46305	1.79204	0.231667	0.999997	1478	RIKEN cDNA 4930570D08 gene	NA		4930570D08Rik
ENSMUSG00000025375	8.98679	26.6408	0.770047	18.5139	-2.37417	-1.24742	0.125596	0.999997	1479	apoptosis-associated tyrosine kinase	11302	11302	Aatk
ENSMUSG00000101191	4.88054	2.31493	1.122	1.48104	2.59053	1.37325	0.158489	0.999997	1480	predicted gene 28809	NA		Gm28809
ENSMUSG00000024534	22.3504	5.94463	22.2271	4.70076	3.50178	1.80809	0.234087	0.999997	1481	synuclein, alpha interacting protein (synphilin)	67847	67847	Sncaip
ENSMUSG00000062098	285.821	571.705	349.702	200.241	-2.99506	-1.58259	0.200793	0.999997	1482	BTB (POZ) domain containing 3	228662	228662	Btbd3
ENSMUSG00000095419	2.16668	5.5365	1.84595	2.14519	-3.01569	-1.59249	0.202672	0.999997	1483	predicted gene 14328	NA		Gm14328
ENSMUSG00000064514	5.9459	15.1118	5.20049	2.9438	-2.59353	-1.37492	0.159135	0.999997	1484	predicted gene, 22455	NA		Gm22455
ENSMUSG00000070385	0.281778	0.0998009	0.0636607	0.0662479	2.61341	1.38593	0.161339	0.999997	1485	adenosine monophosphate deaminase 1	229665	229665	Ampd1
ENSMUSG00000082794	1.00557	0.185215	0.871482	0.180499	3.29264	1.71924	0.223077	0.999997	1486	predicted gene 6806	NA		Gm6806
ENSMUSG00000063683	0.353618	0.1038	0.264757	0.018186	2.61902	1.38903	0.162682	0.999997	1487	glycine-N-acyltransferase	107146	107146	Glyat
ENSMUSG00000025427	1.0743	0.485242	0.285281	0.317243	2.46548	1.30187	0.140714	0.999997	1488	ring finger protein 165	225743	225743	Rnf165
ENSMUSG00000106671	0.279522	0.573462	0.375908	0.296576	-3.21481	-1.68473	0.218524	0.999997	1489	predicted gene 42900	NA		Gm42900
ENSMUSG00000089853	1.48795	0.505007	0.284843	0.176543	2.61702	1.38792	0.163148	0.999997	1490	predicted gene 15853	NA		Gm15853
ENSMUSG00000068696	0.238905	0.0115031	0.413796	0.0199239	3.91307	1.9683	0.255198	0.999997	1491	G-protein coupled receptor 88	64378	64378	Gpr88
ENSMUSG00000021708	0.563111	3.16703	0.340177	3.69849	-3.14216	-1.65175	0.213968	0.999997	1492	RAS protein-specific guanine nucleotide-releasing factor 2	NA		Rasgrf2
ENSMUSG00000045657	0.212315	0.711866	0.131787	0.409442	-2.84837	-1.51014	0.18984	0.999997	1493	protocadherin beta 10	93881	93881	Pcdhb10
ENSMUSG00000055675	27.7073	63.9405	24.2841	12.925	-2.98423	-1.57736	0.201011	0.999997	1494	kelch repeat and BTB (POZ) domain containing 11	74901	74901	Kbtbd11
ENSMUSG00000024206	1.17409	2.8128	0.284514	0.888448	-2.21335	-1.14623	0.0954094	0.999997	1495	regulatory factor X, 2 (influences HLA class II expression)	19725	19725	Rfx2
ENSMUSG00000084932	6.75145	1.29924	7.8681	1.47317	4.05465	2.01958	0.259314	0.999997	1496	predicted gene 15156	NA		Gm15156
ENSMUSG00000052281	0.241435	0.568361	0.138719	0.0734388	-2.50154	-1.32282	0.148454	0.999997	1497	tetraspanin 32, opposite strand	NA		Tspan32os
ENSMUSG00000026315	1.20207	0.63512	0.781324	0.493104	2.68482	1.42483	0.174228	0.999997	1498	serine (or cysteine) peptidase inhibitor, clade B, member 8	20725	20725	Serpinb8
ENSMUSG00000028784	0.130246	0.0340257	0.0674983	0.0324209	2.9824	1.57647	0.20107	0.999997	1499	SPOC domain containing 1	NA		Spocd1
ENSMUSG00000002799	3.24554	8.09726	0.369687	3.43146	-2.19705	-1.13557	0.092291	0.999997	1500	jagged 2	16450	16450	Jag2
ENSMUSG00000086096	1.6761	0.890473	1.65948	1.54235	4.00244	2.00088	0.258726	0.999997	1501	predicted gene 12688	NA		Gm12688
ENSMUSG00000109021	0.0923438	0.103875	0.103711	0.0617861	-3.52818	-1.81892	0.237752	0.999997	1502	predicted gene 44812	NA		Gm44812
ENSMUSG00000027500	1.65913	0.568312	1.10951	0.146939	2.71009	1.43834	0.17673	0.999997	1503	stathmin-like 2	20257	20257	Stmn2
ENSMUSG00000019838	11.5922	6.14759	1.54317	3.77775	2.33777	1.22513	0.121497	0.999997	1504	solute carrier family 16 (monocarboxylic acid transporters), member 10	72472	72472	Slc16a10
ENSMUSG00000061353	41.2462	6.19058	48.4976	4.56855	4.45529	2.15552	0.274678	0.999997	1505	chemokine (C-X-C motif) ligand 12	20315	20315	Cxcl12
ENSMUSG00000103367	2.7081	1.24912	1.66775	1.04662	2.52477	1.33615	0.153645	0.999997	1506	predicted gene, 38158	NA		Gm38158
ENSMUSG00000103937	0.367036	0.789965	0.342943	0.235031	-2.60132	-1.37924	0.164038	0.999997	1507	predicted gene, 37186	NA		Gm37186
ENSMUSG00000058656	8.41453	3.20902	4.00775	1.53907	2.65263	1.40743	0.17293	0.999997	1508	sterile alpha motif domain containing 12	320679	320679	Samd12
ENSMUSG00000020599	15.3053	29.948	11.1611	3.21939	-2.41999	-1.275	0.137708	0.999997	1509	regulator of G-protein signaling 9	19739	19739	Rgs9
ENSMUSG00000087589	2.90754	6.09366	2.5417	2.0575	-2.63376	-1.39712	0.170881	0.999997	1510	RIKEN cDNA D430040D24 gene	NA		D430040D24Rik
ENSMUSG00000054889	0.666283	0.319262	0.224552	0.279187	2.83359	1.50263	0.192916	0.999997	1511	desmoplakin	109620	109620	Dsp
ENSMUSG00000029499	15.5037	42.6008	4.91957	12.6086	-2.66725	-1.41535	0.176524	0.999997	1512	peroxisomal membrane protein 2	19301	19301	Pxmp2
ENSMUSG00000041132	2.75442	5.952	1.2279	2.57963	-2.36511	-1.24191	0.129495	0.999997	1513	NEDD4 binding protein 2-like 1	100637	100637	N4bp2l1
ENSMUSG00000017817	4.58516	1.18955	6.68197	1.006	5.49076	2.45701	0.301441	0.999997	1514	junctophilin 2	59091	59091	Jph2
ENSMUSG00000073274	1.29044	0.540943	1.16743	0.0989879	2.47126	1.30525	0.148284	0.999997	1515	predicted gene 14636	NA		Gm14636
ENSMUSG00000087405	0.419497	1.4651	0.388837	0.888657	-2.61561	-1.38715	0.169305	0.999997	1516	predicted gene 14232	NA		Gm14232
ENSMUSG00000085873	1.68777	5.34781	0.814767	5.16403	-2.60971	-1.38389	0.168449	0.999997	1517	Ttc39a opposite strand RNA 1	NA		Ttc39aos1
ENSMUSG00000103308	3.48764	0.760966	3.45289	0.641092	3.51319	1.81278	0.241351	0.999997	1518	predicted gene, 37800	NA		Gm37800
ENSMUSG00000037490	0.697208	1.82138	0.338548	1.11392	-2.50157	-1.32284	0.153386	0.999997	1519	solute carrier family 2 (facilitated glucose transporter), member 12	353169	353169	Slc2a12
ENSMUSG00000030878	49.2868	21.3601	21.3836	13.0333	2.56041	1.35638	0.161391	0.999997	1520	cerebellar degeneration-related 2	12585	12585	Cdr2
ENSMUSG00000060961	0.364969	0.130601	0.428466	0.116564	3.53754	1.82275	0.243487	0.999997	1521	solute carrier family 4 (anion exchanger), member 4	54403	54403	Slc4a4
ENSMUSG00000037477	0.204112	0.0680473	0.0824644	0.117861	2.61582	1.38727	0.170328	0.999997	1522	T-box 10	109575	109575	Tbx10
ENSMUSG00000035456	1.61674	0.951642	0.673766	1.08985	2.87963	1.52588	0.199176	0.999997	1523	PR domain containing 8	77630	77630	Prdm8
ENSMUSG00000054905	2.62763	0.798529	2.15485	0.760869	3.04603	1.60693	0.212053	0.999997	1524	stefin A3	20863	20863	Stfa3
ENSMUSG00000105449	0.705035	1.5653	0.191719	0.625697	-2.23158	-1.15807	0.104642	0.999997	1525	predicted gene 43379	NA		Gm43379
ENSMUSG00000036661	28.8251	69.5119	9.86069	34.1277	-2.23599	-1.16091	0.105886	0.999997	1526	DENN/MADD domain containing 3	105841	105841	Dennd3
ENSMUSG00000028287	0.625788	0.119214	0.542132	0.104111	3.1932	1.675	0.223161	0.999997	1527	RIKEN cDNA 1700009N14 gene	75471	75471	1700009N14Rik
ENSMUSG00000074874	1013.66	500.292	229.745	307.866	2.56589	1.35946	0.163769	0.999997	1528	cytotoxic T lymphocyte-associated protein 2 beta	13025	13025	Ctla2b
ENSMUSG00000052430	1.24382	0.760533	0.942013	0.884412	2.78642	1.47841	0.191393	0.999997	1529	bone morphogenetic protein receptor, type 1B	12167	12167	Bmpr1b
ENSMUSG00000101211	0.572816	0.303707	0.256344	0.279422	2.59747	1.37711	0.169495	0.999997	1530	predicted gene 28818	NA		Gm28818
ENSMUSG00000026018	0.441991	0.206232	0.119159	0.100693	2.57504	1.36459	0.16564	0.999997	1531	islet cell autoantigen 1-like	70375	70375	Ica1l
ENSMUSG00000058498	0.654485	1.84352	0.383829	1.11453	-2.49042	-1.31639	0.154016	0.999997	1532	ring finger protein 207	433809	433809	Rnf207
ENSMUSG00000026185	35.6336	52.6176	58.7875	75.2617	-4.73932	-2.24468	0.287663	0.999997	1533	insulin-like growth factor binding protein 5	16011	16011	Igfbp5
ENSMUSG00000086754	5.00941	2.42254	1.61488	2.04971	2.50251	1.32338	0.155023	0.999997	1534	predicted gene 16098	NA		Gm16098
ENSMUSG00000003341	0.21834	0.104564	0.115753	0.100732	2.68199	1.4233	0.180962	0.999997	1535	ATPase, class I, type 8B, member 3	67331	67331	Atp8b3
ENSMUSG00000025666	110.528	51.3965	36.1484	36.4765	2.67293	1.41842	0.179352	0.999997	1536	transmembrane protein 47	192216	192216	Tmem47
ENSMUSG00000030562	117.12	31.9318	97.9118	9.84997	3.05929	1.6132	0.215036	0.999997	1537	NADPH oxidase 4	50490	50490	Nox4
ENSMUSG00000031665	0.147557	0.0263468	0.220563	0.045634	4.36418	2.12571	0.277085	0.999997	1538	sal-like 1 (Drosophila)	58198	58198	Sall1
ENSMUSG00000079671	3.43924	0.991608	2.80372	0.609245	3.20113	1.67858	0.225979	0.999997	1539	RIKEN cDNA 2610203C22 gene	NA		2610203C22Rik
ENSMUSG00000111626	1.41853	2.8176	1.75079	1.15922	-2.9612	-1.56618	0.206011	0.999997	1540		NA		AC171206.3
ENSMUSG00000045689	0.9943	3.07845	0.377884	1.3223	-2.51302	-1.32942	0.157606	0.999997	1541	protocadherin beta 4	93875	93875	Pcdhb4
ENSMUSG00000022382	0.169053	0.0613849	0.10915	0.0696026	2.6918	1.42857	0.184225	0.999997	1542	wingless-type MMTV integration site family, member 7B	22422	22422	Wnt7b
ENSMUSG00000058163	0.202296	0.104685	0.21115	0.0907766	3.04242	1.60522	0.214825	0.999997	1543	predicted gene 5431	432555	432555	Gm5431
ENSMUSG00000106944	0.813056	0.170694	0.687602	0.193545	3.83185	1.93804	0.259715	0.999997	1544	predicted gene 43843	NA		Gm43843
ENSMUSG00000100303	1.09566	1.37603	1.44676	0.944903	-3.03025	-1.59944	0.214473	0.999997	1545	RIKEN cDNA 2600014E21 gene	NA		2600014E21Rik
ENSMUSG00000028825	0.786816	0.298001	0.467018	0.151595	2.71885	1.44299	0.186741	0.999997	1546	Rh blood group, D antigen	19746	19746	Rhd
ENSMUSG00000025236	65.8935	145.651	61.933	37.7596	-2.75216	-1.46056	0.190425	0.999997	1547	ADP-dependent glucokinase	72141	72141	Adpgk
ENSMUSG00000037169	18.8344	10.1442	11.3549	7.93148	2.53281	1.34074	0.161387	0.999997	1548	v-myc avian myelocytomatosis viral related oncogene, neuroblastoma derived	18109	18109	Mycn
ENSMUSG00000104519	0.432579	0.795874	0.348019	0.13585	-2.7119	-1.43931	0.186291	0.999997	1549	predicted gene, 37161	NA		Gm37161
ENSMUSG00000017830	7.55491	17.1443	7.88798	13.5711	-2.92507	-1.54847	0.205032	0.999997	1550	DEXH (Asp-Glu-X-His) box polypeptide 58	80861	80861	Dhx58
ENSMUSG00000097654	0.376281	0.132525	0.225609	0.126275	2.73935	1.45383	0.190483	0.999997	1551	predicted gene, 26714	NA		Gm26714
ENSMUSG00000027016	0.0599205	0.330054	0.0315248	0.417003	-2.77315	-1.47153	0.194768	0.999997	1552	zinc finger protein 385B	241494	241494	Zfp385b
ENSMUSG00000052396	8.29976	3.67871	1.271	2.94617	2.4879	1.31493	0.157211	0.999997	1553	monoacylglycerol O-acyltransferase 2	233549	233549	Mogat2
ENSMUSG00000056870	32.9221	7.23792	33.7328	3.22163	3.36143	1.74907	0.240109	0.999997	1554	GULP, engulfment adaptor PTB domain containing 1	70676	70676	Gulp1
ENSMUSG00000048096	1.88655	0.789954	1.66766	0.640686	4.66898	2.22311	0.290458	0.999997	1555	leiomodin 1 (smooth muscle)	93689	93689	Lmod1
ENSMUSG00000023046	0.706913	0.193685	0.216308	0.0212872	2.59289	1.37456	0.174383	0.999997	1556	insulin-like growth factor binding protein 6	16012	16012	Igfbp6
ENSMUSG00000105095	1.08068	2.91345	0.569273	0.830653	-2.29213	-1.19669	0.12474	0.999997	1557	RIKEN cDNA 8430422M14 gene	NA		8430422M14Rik
ENSMUSG00000012187	2.76619	1.27344	0.229531	0.556971	2.25676	1.17426	0.117054	0.999997	1558	monoacylglycerol O-acyltransferase 1	68393	68393	Mogat1
ENSMUSG00000099760	6.3903	2.3669	3.60359	1.4436	2.75194	1.46045	0.193919	0.999997	1559	predicted gene 28800	NA		Gm28800
ENSMUSG00000029468	5.98967	3.18721	0.97601	1.73824	2.26515	1.17961	0.119368	0.999997	1560	purinergic receptor P2X, ligand-gated ion channel, 7	18439	18439	P2rx7
ENSMUSG00000104937	1.66971	4.79107	0.621754	1.03671	-2.69978	-1.43284	0.188636	0.999997	1561	predicted gene 43057	NA		Gm43057
ENSMUSG00000067161	4.17025	1.99082	1.14669	0.668926	2.26467	1.1793	0.119767	0.999997	1562	predicted pseudogene 5560	NA		Gm5560
ENSMUSG00000026073	0.287745	0.0917563	0.051982	0.0247742	2.63615	1.39843	0.181957	0.999997	1563	interleukin 1 receptor, type II	16178	16178	Il1r2
ENSMUSG00000109517	2.84538	4.82263	3.07062	0.169677	-2.66863	-1.4161	0.185999	0.999997	1564	predicted gene 44763	NA		Gm44763
ENSMUSG00000033715	9.27914	2.50735	6.74686	1.88422	2.98582	1.57813	0.214149	0.999997	1565	aldo-keto reductase family 1, member C14	105387	105387	Akr1c14
ENSMUSG00000045662	0.117366	0.260821	0.123055	0.130498	-2.54368	-1.34691	0.16779	0.999997	1566	HEN1 methyltransferase homolog 1 (Arabidopsis)	66715	66715	Henmt1
ENSMUSG00000015653	51.6479	24.7538	18.0858	16.7873	2.50054	1.32224	0.161052	0.999997	1567	six transmembrane epithelial antigen of prostate 2	74051	74051	Steap2
ENSMUSG00000108478	0.374589	0.177485	0.290047	0.199495	3.89495	1.96161	0.267272	0.999997	1568	predicted gene, 19514	NA		Gm19514
ENSMUSG00000044362	0.728031	1.7772	0.31153	0.707023	-2.26603	-1.18017	0.120897	0.999997	1569	coiled-coil domain containing 89	70054	70054	Ccdc89
ENSMUSG00000024409	1.20851	0.467853	0.229379	0.25593	2.3777	1.24956	0.142229	0.999997	1570	psoriasis susceptibility 1 candidate 2 (human)	57390	57390	Psors1c2
ENSMUSG00000086915	0.51945	0.143135	0.385016	0.247916	3.15072	1.65568	0.227679	0.999997	1571	predicted gene 16365	NA		Gm16365
ENSMUSG00000020961	18.9874	43.3787	17.7313	14.2648	-2.8616	-1.51682	0.203795	0.999997	1572	stonin 2	108800	108800	Ston2
ENSMUSG00000097680	0.6563	0.291629	0.167803	0.14694	2.35314	1.23458	0.137768	0.999997	1573	predicted gene, 26642	NA		Gm26642
ENSMUSG00000086746	12.759	4.68199	8.48092	3.45146	2.64144	1.40133	0.184434	0.999997	1574	predicted gene 15222	NA		Gm15222
ENSMUSG00000085755	0.318482	0.818352	0.288845	0.376317	-2.75686	-1.46303	0.196714	0.999997	1575	predicted gene 13496	NA		Gm13496
ENSMUSG00000068220	1937.76	920.706	604.716	357.742	2.23849	1.16252	0.115435	0.999997	1576	lectin, galactose binding, soluble 1	16852	16852	Lgals1
ENSMUSG00000051242	1.23462	5.59766	0.273738	4.34146	-3.04451	-1.60621	0.2212	0.999997	1577	protocadherin beta 9	93880	93880	Pcdhb9
ENSMUSG00000021754	20.1985	44.6044	11.5899	16.0409	-2.282	-1.1903	0.126014	0.999997	1578	mitogen-activated protein kinase kinase kinase 1	26401	26401	Map3k1
ENSMUSG00000027230	12.1508	6.73082	7.43031	4.80875	2.46119	1.29936	0.157444	0.999997	1579	cAMP responsive element binding protein 3-like 1	26427	26427	Creb3l1
ENSMUSG00000024501	239.055	90.7647	148.197	73.3533	2.87132	1.52171	0.206589	0.999997	1580	dihydropyrimidinase-like 3	22240	22240	Dpysl3
ENSMUSG00000024268	6.25197	3.01278	1.75597	0.36895	2.14714	1.10242	0.0965187	0.999997	1581	CUGBP, Elav-like family member 4	108013	108013	Celf4
ENSMUSG00000033676	0.232671	0.200229	0.197066	0.296378	3.62361	1.85743	0.258154	0.999997	1582	gamma-aminobutyric acid (GABA) A receptor, subunit beta 3	14402	14402	Gabrb3
ENSMUSG00000073117	0.227255	0.0366159	0.226542	0.034889	3.10677	1.63541	0.226638	0.999997	1583	predicted gene 7347	664804	664804	Gm7347
ENSMUSG00000026984	2.34608	0.811839	1.17435	0.64847	3.07536	1.62076	0.224529	0.999997	1584	interleukin 1 family, member 6	54448	54448	Il1f6
ENSMUSG00000026080	0.0759051	0.0262276	0.0611199	0.0226904	2.99613	1.5831	0.218167	0.999997	1585	carbohydrate sulfotransferase 10	98388	98388	Chst10
ENSMUSG00000100071	0.183994	0.699729	0.174615	0.0479378	-2.82148	-1.49645	0.202646	0.999997	1586	predicted gene 28707	NA		Gm28707
ENSMUSG00000043122	1.44903	10.0283	1.13857	13.1788	-4.11843	-2.04209	0.278374	0.999997	1587	RIKEN cDNA A530016L24 gene	319942	319942	A530016L24Rik
ENSMUSG00000032373	0.372859	0.133662	0.265797	0.0487193	2.72498	1.44625	0.19522	0.999997	1588	carbonic anhydrase 12	76459	76459	Car12
ENSMUSG00000003526	0.548039	0.243557	0.267668	0.154276	2.55768	1.35483	0.175559	0.999997	1589	proline dehydrogenase	19125	19125	Prodh
ENSMUSG00000052516	0.0926652	0.0466361	0.0719958	0.0578227	3.0481	1.60791	0.224091	0.999997	1590	roundabout guidance receptor 2	268902	268902	Robo2
ENSMUSG00000053930	0.312696	0.170621	0.216662	0.241483	3.87336	1.95358	0.270884	0.999997	1591	shisa family member 6	380702	380702	Shisa6
ENSMUSG00000103916	0.204076	0.40115	0.217091	0.186723	-2.65031	-1.40616	0.189057	0.999997	1592	predicted gene, 38071	NA		Gm38071
ENSMUSG00000032377	23.0009	64.3761	9.49665	46.9596	-2.45555	-1.29604	0.158623	0.999997	1593	phospholipid scramblase 4	235527	235527	Plscr4
ENSMUSG00000096935	0.847115	1.94039	0.145981	0.330439	-2.17638	-1.12193	0.106598	0.999997	1594	RIKEN cDNA 1700113A16 gene	NA		1700113A16Rik
ENSMUSG00000062184	11.327	5.61809	5.27579	4.11731	2.43724	1.28525	0.156695	0.999997	1595	heparan sulfate 6-O-sulfotransferase 2	50786	50786	Hs6st2
ENSMUSG00000074203	2.78091	1.30397	0.867282	1.08622	2.48979	1.31603	0.164624	0.999997	1596	RIKEN cDNA G430095P16 gene	NA		G430095P16Rik
ENSMUSG00000027360	0.264693	0.693597	0.219728	0.495138	-2.86565	-1.51886	0.208105	0.999997	1597	histidine decarboxylase	15186	15186	Hdc
ENSMUSG00000098183	1.14331	3.33398	0.767093	2.8347	-2.61398	-1.38625	0.184372	0.999997	1598	predicted gene, 27010	NA		Gm27010
ENSMUSG00000073758	4.5056	9.6103	2.01486	4.5499	-2.50039	-1.32216	0.166284	0.999997	1599	SH3 domain containing 21	66938	66938	Sh3d21
ENSMUSG00000031838	17.0101	8.11571	10.9046	1.91436	2.3767	1.24896	0.148052	0.999997	1600	interferon gamma inducible protein 30	NA		Ifi30
ENSMUSG00000110289	0.437363	1.26926	0.261602	0.580961	-2.63801	-1.39945	0.188412	0.999997	1601	RIKEN cDNA 4930412F12 gene	NA		4930412F12Rik
ENSMUSG00000085501	3.12432	8.18276	0.794938	4.51619	-2.31167	-1.20893	0.13446	0.999997	1602	predicted gene 11772	NA		Gm11772
ENSMUSG00000026564	1.08086	0.301011	1.33887	0.319093	3.88397	1.95753	0.272992	0.999997	1603	dual specificity phosphatase 27 (putative)	240892	240892	Dusp27
ENSMUSG00000021835	160.724	84.35	70.1483	75.1351	2.67364	1.4188	0.192639	0.999997	1604	bone morphogenetic protein 4	12159	12159	Bmp4
ENSMUSG00000048373	0.59471	0.153243	0.763912	0.265425	4.12217	2.0434	0.280323	0.999997	1605	fibroblast growth factor binding protein 1	14181	14181	Fgfbp1
ENSMUSG00000022206	64.5397	22.5746	53.8908	20.1438	3.02282	1.5959	0.223724	0.999997	1606	natriuretic peptide receptor 3	18162	18162	Npr3
ENSMUSG00000024030	92.1179	31.2278	66.7604	17.6944	2.87963	1.52589	0.212352	0.999997	1607	ATP-binding cassette, sub-family G (WHITE), member 1	11307	11307	Abcg1
ENSMUSG00000029371	10.7776	1.22081	15.3393	1.65201	5.50901	2.46179	0.316377	0.999997	1608	chemokine (C-X-C motif) ligand 5	20311	20311	Cxcl5
ENSMUSG00000037139	0.145421	0.942644	0.0452709	1.3232	-3.00278	-1.5863	0.222489	0.999997	1609	myomesin family, member 3	242702	242702	Myom3
ENSMUSG00000081965	0.210988	0.0655394	0.0258085	0.113518	2.63246	1.39641	0.189075	0.999997	1610	predicted gene 11620	NA		Gm11620
ENSMUSG00000099230	7.23909	16.8413	5.51275	4.93089	-2.41269	-1.27064	0.15486	0.999997	1611	microRNA 6989	NA		Mir6989
ENSMUSG00000091272	0.722158	1.15178	0.826162	0.242886	-2.54521	-1.34779	0.176801	0.999997	1612	predicted gene, 17641	NA		Gm17641
ENSMUSG00000080198	0.296507	1.1821	0.274835	0.81139	-2.80039	-1.48563	0.204461	0.999997	1613	predicted gene 13573	NA		Gm13573
ENSMUSG00000107491	1.6289	3.28009	1.05061	0.675761	-2.24617	-1.16746	0.124443	0.999997	1614	predicted gene, 17893	NA		Gm17893
ENSMUSG00000097993	0.514753	0.262955	0.0402257	0.104755	2.19608	1.13493	0.113438	0.999997	1615	protein tyrosine phosphatase, receptor type, V	NA		Ptprv
ENSMUSG00000110329	0.496406	0.229591	0.149198	0.135395	2.70131	1.43366	0.19692	0.999997	1616	predicted gene 45304	NA		Gm45304
ENSMUSG00000027474	49.8126	119.073	15.1537	54.7363	-2.255	-1.17313	0.126253	0.999997	1617	cerebral cavernous malformation 2-like	228788	228788	Ccm2l
ENSMUSG00000103194	0.173673	0.222844	0.30081	0.077903	-3.37701	-1.75574	0.251325	0.999997	1618	predicted gene, 37643	NA		Gm37643
ENSMUSG00000104026	0.171815	0.40472	0.110818	0.0764278	-2.53077	-1.33958	0.176509	0.999997	1619	predicted gene, 37212	NA		Gm37212
ENSMUSG00000022594	20.8871	12.0631	2.49652	9.00465	2.45588	1.29624	0.163186	0.999997	1620	Ly6/neurotoxin 1	23936	23936	Lynx1
ENSMUSG00000038175	22.0747	45.7206	8.82507	7.33454	-2.12751	-1.08917	0.0984043	0.999997	1621	myosin regulatory light chain interacting protein	218203	218203	Mylip
ENSMUSG00000029231	1.80226	1.08039	1.31198	1.06639	2.69749	1.43162	0.197621	0.999997	1622	platelet derived growth factor receptor, alpha polypeptide	18595	18595	Pdgfra
ENSMUSG00000020695	6.51992	2.21298	8.97758	2.47864	3.93868	1.97771	0.277129	0.999997	1623	mannose receptor, C type 2	17534	17534	Mrc2
ENSMUSG00000034968	0.781364	0.309087	0.339774	0.336977	2.65387	1.4081	0.194053	0.999997	1624	ladybird homeobox homolog 2 (Drosophila)	16815	16815	Lbx2
ENSMUSG00000025026	70.1521	173.53	31.5646	85.514	-2.33662	-1.22442	0.141823	0.999997	1625	adducin 3 (gamma)	27360	27360	Add3
ENSMUSG00000111531	40.4256	17.4342	12.6293	9.52459	2.46989	1.30445	0.165769	0.999997	1626		NA		AC161054.2
ENSMUSG00000032491	28.2858	15.7306	7.80298	9.10027	2.26046	1.17662	0.129221	0.999997	1627	neurotrophin receptor associated death domain	67169	67169	Nradd
ENSMUSG00000049872	0.865981	0.358298	0.675065	0.194325	2.66178	1.41239	0.195362	0.999997	1628	family with sequence similarity 26, member E	103511	103511	Fam26e
ENSMUSG00000086839	1.87515	0.625413	0.765347	0.225615	2.42837	1.27999	0.160019	0.999997	1629	predicted gene 11973	NA		Gm11973
ENSMUSG00000015766	3.68578	6.88808	3.477	2.88691	-2.53207	-1.34032	0.176902	0.999997	1630	epidermal growth factor receptor pathway substrate 8	13860	13860	Eps8
ENSMUSG00000064984	4.13881	12.1346	3.61995	3.33246	-2.61797	-1.38845	0.189861	0.999997	1631	small nucleolar RNA, C/D box U73A	NA		Snord73a
ENSMUSG00000102260	0.0905791	0.227952	0.111795	0.145158	-2.79294	-1.48179	0.205575	0.999997	1632	RIKEN cDNA D330025C20 gene	NA		D330025C20Rik
ENSMUSG00000097736	0.941674	2.16571	0.181274	0.720567	-2.11545	-1.08096	0.0961044	0.999997	1633	RIKEN cDNA 9530059O14 gene	NA		9530059O14Rik
ENSMUSG00000027533	153.05	358.167	141.715	56.7325	-3.13179	-1.64699	0.236156	0.999997	1634	fatty acid binding protein 5, epidermal	16592	16592	Fabp5
ENSMUSG00000106164	0.525298	1.19009	0.203789	0.172248	-2.39125	-1.25776	0.154881	0.999997	1635	predicted gene 43270	NA		Gm43270
ENSMUSG00000085658	0.13223	0.341345	0.137893	0.196776	-2.59528	-1.37589	0.188352	0.999997	1636	predicted gene 15704	NA		Gm15704
ENSMUSG00000104940	1.19107	0.298432	0.901909	0.260265	3.05773	1.61246	0.230709	0.999997	1637	predicted gene 42908	NA		Gm42908
ENSMUSG00000039239	47.2094	17.0197	31.3734	9.70335	2.75702	1.46311	0.204239	0.999997	1638	transforming growth factor, beta 2	21808	21808	Tgfb2
ENSMUSG00000016150	0.129036	0.0220008	0.103059	0.00150726	3.94215	1.97898	0.279724	0.999997	1639	teneurin transmembrane protein 1	23963	23963	Tenm1
ENSMUSG00000009772	3.75954	1.6528	1.86621	0.462123	2.36853	1.24399	0.152384	0.999997	1640	NUAK family, SNF1-like kinase, 2	74137	74137	Nuak2
ENSMUSG00000098562	7.48405	7.91855	8.40533	6.00047	-3.36456	-1.75042	0.253848	0.999997	1641	microRNA 6910	NA		Mir6910
ENSMUSG00000067261	1.10304	1.13408	0.984109	1.96429	5.30715	2.40794	0.316892	0.999997	1642	forkhead box D3	15221	15221	Foxd3
ENSMUSG00000019880	18.6954	35.5713	21.2071	15.048	-3.40445	-1.76742	0.255988	0.999997	1643	R-spondin 3	72780	72780	Rspo3
ENSMUSG00000064343	16.2529	6.17829	7.45168	5.88691	2.92802	1.54993	0.221763	0.999997	1644	mitochondrially encoded tRNA glutamine	NA		mt-Tq
ENSMUSG00000040283	2.94108	5.53859	3.87126	4.26358	-3.1653	-1.66234	0.241082	0.999997	1645	butyrophilin-like 9	237754	237754	Btnl9
ENSMUSG00000068245	10.1041	23.2719	7.76909	14.9651	-2.62339	-1.39143	0.193623	0.999997	1646	PHD finger protein 11D	219132	219132	Phf11d
ENSMUSG00000044757	0.21631	0.485438	0.234781	0.0142743	-2.50394	-1.3242	0.17673	0.999997	1647	predicted gene 6430	NA		Gm6430
ENSMUSG00000021194	0.17131	0.0503324	0.156224	0.0871782	2.99102	1.58064	0.22773	0.999997	1648	chromogranin A	12652	12652	Chga
ENSMUSG00000044197	24.974	58.3658	9.4278	19.7212	-2.27504	-1.18589	0.136279	0.999997	1649	G protein-coupled receptor 146	80290	80290	Gpr146
ENSMUSG00000022543	0.907625	2.89026	0.199887	1.713	-2.42056	-1.27534	0.162103	0.999997	1650	RIKEN cDNA 4930451G09 gene	NA		4930451G09Rik
ENSMUSG00000022525	0.246213	0.112386	0.0616753	0.0996509	2.69702	1.43136	0.20078	0.999997	1651	HRAS-like suppressor	27281	27281	Hrasls
ENSMUSG00000109975	1.11614	2.51618	0.28564	0.645126	-2.24279	-1.1653	0.129115	0.999997	1652	predicted gene, 19196	NA		Gm19196
ENSMUSG00000055435	42.0078	82.6223	46.0025	29.0257	-2.67797	-1.42114	0.199715	0.999997	1653	avian musculoaponeurotic fibrosarcoma oncogene homolog	17132	17132	Maf
ENSMUSG00000034040	0.804422	0.465957	0.3515	0.477543	2.70966	1.43811	0.201384	0.999997	1654	Williams-Beuren syndrome chromosome region 17 homolog (human)	212996	212996	Wbscr17
ENSMUSG00000030525	4.4919	4.06574	1.95163	5.18878	2.90047	1.53629	0.221154	0.999997	1655	cholinergic receptor, nicotinic, alpha polypeptide 7	11441	11441	Chrna7
ENSMUSG00000031137	2.18726	7.24136	0.502214	5.3856	-2.34641	-1.23046	0.15049	0.999997	1656	fibroblast growth factor 13	14168	14168	Fgf13
ENSMUSG00000022773	3.09961	6.50018	1.55506	0.897669	-2.24836	-1.16888	0.130545	0.999997	1657	yippee-like 1 (Drosophila)	106369	106369	Ypel1
ENSMUSG00000109618	1.33517	3.25803	0.255993	0.439401	-2.16584	-1.11493	0.113715	0.999997	1658	predicted gene 45527	NA		Gm45527
ENSMUSG00000062017	0.662201	0.206782	0.674201	0.340553	5.14058	2.36193	0.317673	0.999997	1659	ATP-binding cassette, sub-family A (ABC1), member 14	67928	67928	Abca14
ENSMUSG00000037999	6.46875	3.25225	1.43171	1.31618	2.17974	1.12415	0.117516	0.999997	1660	ArfGAP with RhoGAP domain, ankyrin repeat and PH domain 2	212285	212285	Arap2
ENSMUSG00000021451	5.51679	13.0483	4.30988	4.51951	-2.8326	-1.50213	0.215596	0.999997	1661	sema domain, immunoglobulin domain (Ig), transmembrane domain (TM) and short cytoplasmic domain, (semaphorin) 4D	20354	20354	Sema4d
ENSMUSG00000108452	0.326154	0.844914	0.226009	0.38796	-2.54915	-1.35002	0.186408	0.999997	1662	RIKEN cDNA 4930413G21 gene	NA		4930413G21Rik
ENSMUSG00000043629	0.0256336	0.282118	0.0252766	0.422962	-3.21548	-1.68503	0.248824	0.999997	1663	RIKEN cDNA 1700019D03 gene	67080	67080	1700019D03Rik
ENSMUSG00000038390	0.60152	0.270439	0.185956	0.151153	2.35118	1.23338	0.153676	0.999997	1664	G protein-coupled receptor 162	14788	14788	Gpr162
ENSMUSG00000031662	1.23274	0.623192	0.43627	0.462761	2.58799	1.37183	0.193372	0.999997	1665	sorting nexin 20	71607	71607	Snx20
ENSMUSG00000027961	0.789994	0.39262	0.252075	0.183062	2.2525	1.17153	0.133276	0.999997	1666	leucine rich repeat containing 39	109245	109245	Lrrc39
ENSMUSG00000021499	0.246404	0.787343	0.0742764	0.355129	-2.43364	-1.28311	0.169688	0.999997	1667	cation channel, sperm associated 3	76856	76856	Catsper3
ENSMUSG00000044199	7.72289	20.1887	1.14956	8.52612	-2.19999	-1.1375	0.123095	0.999997	1668	sphingosine-1-phosphate receptor 4	13611	13611	S1pr4
ENSMUSG00000010461	0.0699427	0.0232858	0.0659889	0.0221876	3.02151	1.59527	0.233756	0.999997	1669	EYA transcriptional coactivator and phosphatase 4	14051	14051	Eya4
ENSMUSG00000104469	0.31107	0.4141	0.274079	0.0849242	-2.98432	-1.5774	0.229614	0.999997	1670	predicted gene, 37663	NA		Gm37663
ENSMUSG00000081094	3.3779	1.24643	1.08747	0.358599	2.36278	1.24048	0.155556	0.999997	1671	ribosomal protein L19, pseudogene 11	NA		Rpl19-ps11
ENSMUSG00000087400	5.34143	2.56848	2.5072	1.55638	2.52195	1.33454	0.184123	0.999997	1672	predicted gene 15270	NA		Gm15270
ENSMUSG00000074715	0.563033	1.16266	0.391894	0.0471261	-2.2876	-1.19384	0.141983	0.999997	1673	chemokine (C-C motif) ligand 28	56838	56838	Ccl28
ENSMUSG00000053914	1.22178	0.407342	0.756379	0.174585	2.73919	1.45375	0.207862	0.999997	1674	lysine (K)-specific demethylase 4D	244694	244694	Kdm4d
ENSMUSG00000021679	1.37292	0.695318	1.61145	1.20433	3.34558	1.74225	0.258192	0.999997	1675	S100 calcium binding protein, zeta	268686	268686	S100z
ENSMUSG00000042554	0.747909	0.225178	0.865107	0.247707	4.05182	2.01857	0.290302	0.999997	1676	zona pellucida 3 receptor	22789	22789	Zp3r
ENSMUSG00000104969	0.893642	0.631829	0.4406	0.832441	2.87489	1.52351	0.222508	0.999997	1677	predicted gene 43445	NA		Gm43445
ENSMUSG00000047904	0.312612	0.0835384	0.220974	0.0998935	3.28162	1.71441	0.254899	0.999997	1678	somatostatin receptor 2	20606	20606	Sstr2
ENSMUSG00000098070	0.851185	0.439538	0.367643	0.418808	2.60382	1.38063	0.195619	0.999997	1679	predicted gene 8609	NA		Gm8609
ENSMUSG00000037411	2614.05	999.908	2170.91	1563.36	4.52992	2.17948	0.307766	0.999997	1680	serine (or cysteine) peptidase inhibitor, clade E, member 1	18787	18787	Serpine1
ENSMUSG00000078453	145.38	70.4987	34.2195	29.1721	2.26182	1.17749	0.139086	0.999997	1681	ABRA C-terminal like	73112	73112	Abracl
ENSMUSG00000034780	0.916556	0.473783	0.334647	0.375878	2.51297	1.32939	0.184571	0.999997	1682	UDP-Gal:betaGlcNAc beta 1,3-galactosyltransferase, polypeptide 1	26877	26877	B3galt1
ENSMUSG00000097006	4.57521	9.31122	3.65234	3.82484	-2.55194	-1.3516	0.189828	0.999997	1683	RIKEN cDNA 9530082P21 gene	NA		9530082P21Rik
ENSMUSG00000104239	0.137693	0.362888	0.0525433	0.110445	-2.27773	-1.1876	0.142044	0.999997	1684	predicted gene, 37588	NA		Gm37588
ENSMUSG00000112756	3.46712	6.0468	2.8398	1.97033	-2.32052	-1.21445	0.15106	0.999997	1685		NA		AC125487.2
ENSMUSG00000084145	0.552084	0.15559	0.456087	0.163714	2.81194	1.49157	0.217546	0.999997	1686	predicted gene 12263	NA		Gm12263
ENSMUSG00000074259	0.137811	0.0758793	0.122312	0.0802255	3.34429	1.7417	0.259343	0.999997	1687	GRAM domain containing 2	546134	546134	Gramd2
ENSMUSG00000033022	4.64853	1.541	5.25383	1.13884	2.94137	1.55649	0.229364	0.999997	1688	cysteine dioxygenase 1, cytosolic	12583	12583	Cdo1
ENSMUSG00000104214	0.609883	1.37742	0.333265	0.634367	-2.43604	-1.28454	0.173898	0.999997	1689	predicted gene, 36638	NA		Gm36638
ENSMUSG00000090105	0.263586	0.649498	0.286423	0.15164	-2.56813	-1.36072	0.194628	0.999997	1690	predicted gene 15890	NA		Gm15890
ENSMUSG00000017314	6.78581	25.1893	3.55412	22.5525	-2.56036	-1.35635	0.193137	0.999997	1691	membrane protein, palmitoylated 2 (MAGUK p55 subfamily member 2)	50997	50997	Mpp2
ENSMUSG00000050447	0.0928014	0.22997	0.0820959	0.0542217	-2.52649	-1.33713	0.18824	0.999997	1692	LY6/PLAUR domain containing 6	320343	320343	Lypd6
ENSMUSG00000029161	42.5431	23.0344	19.1884	17.6284	2.37587	1.24846	0.162461	0.999997	1693	cell growth regulator with EF hand domain 1	68567	68567	Cgref1
ENSMUSG00000042842	98.3934	49.9674	39.0803	36.7388	2.31278	1.20963	0.151172	0.999997	1694	serine (or cysteine) peptidase inhibitor, clade B, member 6b	20708	20708	Serpinb6b
ENSMUSG00000085032	0.358815	0.0779435	0.369438	0.067588	3.00742	1.58852	0.237311	0.999997	1695	predicted gene 11217	NA		Gm11217
ENSMUSG00000065236	3.62777	6.07391	2.74448	2.35968	-2.92112	-1.54652	0.228985	0.999997	1696	nuclear encoded rRNA 5S 197	NA		n-R5s197
ENSMUSG00000113527	1.53512	3.56643	1.34267	1.59778	-2.64774	-1.40476	0.203393	0.999997	1697		NA		AC104832.1
ENSMUSG00000031548	7.12105	3.99917	1.98619	2.33628	2.27851	1.18809	0.145389	0.999997	1698	secreted frizzled-related protein 1	20377	20377	Sfrp1
ENSMUSG00000037784	6.21024	3.24852	3.27039	1.43551	2.28732	1.19366	0.147167	0.999997	1699	DAZ interacting protein 1-like	72507	72507	Dzip1l
ENSMUSG00000074280	13.9558	35.0025	13.5745	8.96218	-3.44357	-1.78391	0.266561	0.999997	1700	predicted gene 6166	NA		Gm6166
ENSMUSG00000020872	0.436965	1.37039	0.272877	0.481158	-2.83712	-1.50443	0.221656	0.999997	1701	tachykinin 4	93670	93670	Tac4
ENSMUSG00000020435	0.943113	3.12418	0.564421	2.90534	-2.5673	-1.36025	0.195538	0.999997	1702	oxysterol binding protein 2	74309	74309	Osbp2
ENSMUSG00000059562	0.189093	0.588967	0.175437	0.465687	-2.65958	-1.4112	0.204628	0.999997	1703	coiled-coil domain containing 154	207209	207209	Ccdc154
ENSMUSG00000021638	3.27405	5.6326	3.31821	3.31914	-2.43373	-1.28317	0.175954	0.999997	1704	occludin	18260	18260	Ocln
ENSMUSG00000097289	7.11249	1.25017	8.02182	0.602924	3.57933	1.83969	0.274937	0.999997	1705	RIKEN cDNA 2010300F17 gene	NA		2010300F17Rik
ENSMUSG00000032036	0.219457	0.105535	0.0478553	0.0728735	2.34761	1.23119	0.158405	0.999997	1706	kin of IRRE like 3 (Drosophila)	67703	67703	Kirrel3
ENSMUSG00000032845	0.0289318	0.115633	0.0293462	0.101959	-2.62707	-1.39346	0.202486	0.999997	1707	alpha-kinase 2	225638	225638	Alpk2
ENSMUSG00000009097	111.126	270.287	9.09504	124.703	-2.16571	-1.11484	0.122222	0.999997	1708	T-box 1	21380	21380	Tbx1
ENSMUSG00000020184	389.222	200.845	42.8936	83.1233	2.16606	1.11507	0.123131	0.999997	1709	transformed mouse 3T3 cell double minute 2	17246	17246	Mdm2
ENSMUSG00000085527	0.157656	0.467607	0.190013	0.219739	-2.58603	-1.37074	0.199013	0.999997	1710	predicted gene 15535	NA		Gm15535
ENSMUSG00000107801	0.192893	0.39713	0.190565	0.234846	-2.48037	-1.31056	0.184757	0.999997	1711	predicted gene, 44086	NA		Gm44086
ENSMUSG00000084333	0.151684	0.574106	0.262725	0.362788	-2.53727	-1.34328	0.193535	0.999997	1712	predicted gene 11599	NA		Gm11599
ENSMUSG00000006651	21.713	11.0836	6.90122	3.95266	2.22207	1.15191	0.135668	0.999997	1713	amyloid beta (A4) precursor-like protein 1	11803	11803	Aplp1
ENSMUSG00000037428	1.87993	1.52802	1.72622	2.14406	3.14903	1.65491	0.251022	0.999997	1714	VGF nerve growth factor inducible	381677	381677	Vgf
ENSMUSG00000048251	1.59235	1.36203	1.27417	1.97666	3.14727	1.6541	0.251028	0.999997	1715	B cell leukemia/lymphoma 11B	58208	58208	Bcl11b
ENSMUSG00000068740	0.885465	2.62387	0.61864	1.35884	-2.43291	-1.28268	0.177698	0.999997	1716	cadherin, EGF LAG seven-pass G-type receptor 2	53883	53883	Celsr2
ENSMUSG00000111229	0.428623	0.101952	0.258657	0.0890359	3.12787	1.64518	0.25041	0.999997	1717		NA		AC126459.2
ENSMUSG00000022385	108.312	53.8496	17.5629	14.7409	2.10803	1.0759	0.109348	0.999997	1718	G two S phase expressed protein 1	29870	29870	Gtse1
ENSMUSG00000056821	0.713195	0.138276	0.702886	0.121683	3.16411	1.6618	0.25377	0.999997	1719	RIKEN cDNA 1700028I16 gene	NA		1700028I16Rik
ENSMUSG00000072244	6.57241	1.89788	6.17265	1.22701	3.05621	1.61175	0.245676	0.999997	1720	tripartite motif-containing 6	94088	94088	Trim6
ENSMUSG00000055639	5.79214	3.02181	3.97097	2.3247	2.73688	1.45253	0.216792	0.999997	1721	dachshund 1 (Drosophila)	13134	13134	Dach1
ENSMUSG00000079429	0.117913	0.685786	0.0678941	0.852417	-2.87242	-1.52226	0.229737	0.999997	1722	maestro heat-like repeat family member 2A	100040766	100040766	Mroh2a
ENSMUSG00000101431	0.283941	0.926624	0.379372	0.475442	-2.90993	-1.54098	0.233693	0.999997	1723	predicted gene 7901	NA		Gm7901
ENSMUSG00000062432	0.148399	0.355486	0.0651165	0.129948	-2.34008	-1.22656	0.160571	0.999997	1724	cytochrome P450, family 26, subfamily c, polypeptide 1	546726	546726	Cyp26c1
ENSMUSG00000109749	1.12453	0.513911	0.620505	0.46152	3.02163	1.59533	0.243528	0.999997	1725	predicted gene, 18907	NA		Gm18907
ENSMUSG00000113061	0.714405	0.342791	0.755096	0.593731	3.09976	1.63215	0.249417	0.999997	1726		NA		AL607105.1
ENSMUSG00000098120	2.72669	5.6001	1.59148	1.14847	-2.21425	-1.14682	0.136715	0.999997	1727	predicted gene 5914	NA		Gm5914
ENSMUSG00000105442	0.113006	0.366455	0.0351796	0.149382	-2.77617	-1.47309	0.221905	0.999997	1728	predicted gene 42614	NA		Gm42614
ENSMUSG00000058589	0.792758	0.406104	0.0586428	0.366336	2.40534	1.26624	0.174765	0.999997	1729	ankyrin repeat and sterile alpha motif domain containing 1B	77531	77531	Anks1b
ENSMUSG00000049928	0.158355	0.0657859	0.108381	0.0675514	2.67164	1.41773	0.211494	0.999997	1730	glucagon-like peptide 2 receptor	93896	93896	Glp2r
ENSMUSG00000038007	4.68364	11.7665	4.70697	10.3419	-2.78192	-1.47608	0.222375	0.999997	1731	alkaline ceramidase 2	230379	230379	Acer2
ENSMUSG00000104212	2.86898	1.52302	0.850599	1.20039	2.6232	1.39133	0.204661	0.999997	1732	predicted gene, 37986	NA		Gm37986
ENSMUSG00000041605	0.336008	0.136181	0.436501	0.126798	3.89784	1.96267	0.296538	0.999997	1733	RIKEN cDNA 5730559C18 gene	67313	67313	5730559C18Rik
ENSMUSG00000097767	0.0838621	0.227705	0.0386772	0.0434383	-2.50767	-1.32635	0.192487	0.999997	1734	myocardial infarction associated transcript (non-protein coding)	NA		Miat
ENSMUSG00000026628	314.923	87.467	306.12	46.1711	3.07208	1.61922	0.248698	0.999997	1735	activating transcription factor 3	11910	11910	Atf3
ENSMUSG00000106617	1.63007	3.41777	0.341662	0.830062	-2.09059	-1.06391	0.108528	0.999997	1736	predicted gene, 36266	NA		Gm36266
ENSMUSG00000023087	19.5699	5.92668	15.9182	1.07424	2.7535	1.46127	0.221003	0.999997	1737	nocturnin	12457	12457	Noct
ENSMUSG00000012819	0.205328	0.102572	0.0241415	0.0496696	2.25213	1.17129	0.146044	0.999997	1738	cadherin 23 (otocadherin)	22295	22295	Cdh23
ENSMUSG00000038463	31.0626	15.8628	23.29	16.8295	2.84212	1.50697	0.228197	0.999997	1739	olfactomedin-like 2B	320078	320078	Olfml2b
ENSMUSG00000074232	0.347163	0.447795	0.278071	0.115979	-2.7996	-1.48522	0.225469	0.999997	1740	predicted gene 10647	NA		Gm10647
ENSMUSG00000029070	143.407	80.9225	20.0021	60.5344	2.3751	1.24799	0.171865	0.999997	1741	matrix-remodelling associated 8	74761	74761	Mxra8
ENSMUSG00000095913	0.547069	0.203264	0.221025	0.176259	2.77552	1.47276	0.224007	0.999997	1742	predicted gene, 21844	NA		Gm21844
ENSMUSG00000041117	0.590509	0.228454	0.407993	0.102121	2.58487	1.37009	0.203126	0.999997	1743	coiled-coil domain containing 8	434130	434130	Ccdc8
ENSMUSG00000021699	11.6749	24.0298	6.49149	8.80558	-2.24306	-1.16547	0.145208	0.999997	1744	phosphodiesterase 4D, cAMP specific	238871	238871	Pde4d
ENSMUSG00000035385	4850.37	3005.73	1657.29	2624.18	3.0486	1.60815	0.248723	0.999997	1745	chemokine (C-C motif) ligand 2	20296	20296	Ccl2
ENSMUSG00000113650	0.973668	2.0622	0.548737	0.670104	-2.3129	-1.2097	0.159497	0.999997	1746		NA		AC153144.1
ENSMUSG00000085604	8.63397	16.8927	9.23774	5.94655	-3.98539	-1.99472	0.30237	0.999997	1747	DEAH (Asp-Glu-Ala-His) box polypeptide 58, opposite strand	NA		Dhx58os
ENSMUSG00000079243	0.0966685	0.0237568	0.109158	0.041148	3.91456	1.96885	0.300771	0.999997	1748	xin actin-binding repeat containing 1	22437	22437	Xirp1
ENSMUSG00000103047	1.05678	1.31951	1.8304	2.10594	-5.88226	-2.55637	0.346741	0.999997	1749	predicted gene, 37310	NA		Gm37310
ENSMUSG00000097165	0.569709	1.06303	0.561718	0.313943	-2.34539	-1.22983	0.167133	0.999997	1750	RIKEN cDNA 2210008F06 gene	NA		2210008F06Rik
ENSMUSG00000031342	4.29587	3.36006	4.36772	4.64659	3.63955	1.86376	0.286371	0.999997	1751	glycoprotein m6b	14758	14758	Gpm6b
ENSMUSG00000111292	0.45537	1.03917	0.395926	0.363278	-2.55215	-1.35171	0.200559	0.999997	1752		NA		AC159308.4
ENSMUSG00000104476	0.217006	0.118719	0.154658	0.107295	2.95022	1.56082	0.24196	0.999997	1753	predicted gene, 38211	NA		Gm38211
ENSMUSG00000098226	0.517115	0.207864	0.199831	0.212003	2.6335	1.39698	0.211115	0.999997	1754	predicted gene 5272	NA		Gm5272
ENSMUSG00000076430	0.163973	0.498721	0.0200576	0.274055	-2.5369	-1.34307	0.199217	0.999997	1755	HUS1 checkpoint clamp component B	210554	210554	Hus1b
ENSMUSG00000107608	2.42897	1.07582	1.0253	0.4323	2.22309	1.15256	0.143558	0.999997	1756	predicted gene, 43863	NA		Gm43863
ENSMUSG00000080893	0.881546	0.300796	0.304341	0.520995	2.61666	1.38773	0.208185	0.999997	1757	predicted gene 15920	NA		Gm15920
ENSMUSG00000105427	0.083813	2.82605	0.145168	4.6661	-3.23765	-1.69495	0.264178	0.999997	1758	predicted gene, 31678	NA		Gm31678
ENSMUSG00000021536	1.09757	0.538698	0.88754	0.582239	3.83147	1.9379	0.298001	0.999997	1759	adenylate cyclase 2	210044	210044	Adcy2
ENSMUSG00000104520	0.475701	1.15993	0.649522	0.916471	-3.34863	-1.74357	0.273045	0.999997	1760	predicted gene, 37336	NA		Gm37336
ENSMUSG00000009487	0.0338198	0.00389474	0.0433787	0.00674589	3.17925	1.66868	0.260034	0.999997	1761	otogelin	18419	18419	Otog
ENSMUSG00000008438	0.0853842	0.250123	0.0578994	0.253873	-2.64553	-1.40356	0.213997	0.999997	1762	a disintegrin and metallopeptidase domain 21	56622	56622	Adam21
ENSMUSG00000047953	1.30091	0.811002	0.790918	0.857719	2.47073	1.30494	0.191586	0.999997	1763	glycoprotein 5 (platelet)	14729	14729	Gp5
ENSMUSG00000038894	9.28145	3.46198	7.50431	2.49095	2.71944	1.44331	0.221597	0.999997	1764	insulin receptor substrate 2	384783	384783	Irs2
ENSMUSG00000081763	0.951925	0.446764	0.324572	0.580595	2.55992	1.3561	0.203012	0.999997	1765	predicted gene 9435	NA		Gm9435
ENSMUSG00000085482	0.166307	0.70228	0.288053	0.346898	-2.70034	-1.43314	0.220958	0.999997	1766	RIKEN cDNA A230083N12 gene	NA		A230083N12Rik
ENSMUSG00000072769	0.334873	0.320814	0.31365	0.301111	-4.57334	-2.19325	0.325003	0.999997	1767	predicted gene 10419	NA		Gm10419
ENSMUSG00000025915	56.6154	132.505	48.1848	68.323	-2.48585	-1.31374	0.195476	0.999997	1768	serum/glucocorticoid regulated kinase 3	170755	170755	Sgk3
ENSMUSG00000041658	1.87107	4.26219	1.29762	0.670126	-2.56587	-1.35945	0.20467	0.999997	1769	Ras-related GTP binding B	245670	245670	Rragb
ENSMUSG00000030048	1.20021	0.162051	2.07883	0.280681	3.87963	1.95592	0.302878	0.999997	1770	gastrokine 3	68888	68888	Gkn3
ENSMUSG00000087222	1.37729	3.80987	0.147678	2.57528	-2.31703	-1.21228	0.165989	0.999997	1771	RIKEN cDNA E030042O20 gene	NA		E030042O20Rik
ENSMUSG00000097614	0.221211	0.0697315	0.0666822	0.0652964	2.40446	1.26571	0.183971	0.999997	1772	predicted gene, 26508	NA		Gm26508
ENSMUSG00000055370	0.820006	1.68902	0.375597	0.654466	-2.19285	-1.13281	0.140032	0.999997	1773	predicted gene 9968	NA		Gm9968
ENSMUSG00000036242	1.37262	3.68396	0.651532	1.55563	-2.2966	-1.1995	0.162387	0.999997	1774	RIKEN cDNA 3632451O06 gene	67419	67419	3632451O06Rik
ENSMUSG00000025880	90.2655	18.6075	108.872	4.89665	3.11484	1.63916	0.258651	0.999997	1775	SMAD family member 7	17131	17131	Smad7
ENSMUSG00000022579	9.01249	10.3047	6.66339	1.88057	-2.55766	-1.35482	0.204342	0.999997	1776	GPI-anchored HDL-binding protein 1	68453	68453	Gpihbp1
ENSMUSG00000052981	37.2326	93.5349	26.584	24.6568	-2.86921	-1.52065	0.238902	0.999997	1777	ubiquitin-conjugating enzyme E2Q family-like 1	76980	76980	Ube2ql1
ENSMUSG00000027546	12.7135	31.3069	6.35771	10.8961	-2.41264	-1.27061	0.185356	0.999997	1778	ATPase, class II, type 9A	11981	11981	Atp9a
ENSMUSG00000111539	0.836324	1.64063	0.615362	0.54573	-2.28543	-1.19247	0.160994	0.999997	1779		NA		AC127596.2
ENSMUSG00000032278	0.105169	0.25666	0.0449247	0.135619	-2.47593	-1.30797	0.195987	0.999997	1780	progestin and adipoQ receptor family member V	74090	74090	Paqr5
ENSMUSG00000086425	0.160413	0.286058	0.110192	0.135345	-2.61466	-1.38662	0.213991	0.999997	1781	RIKEN cDNA F730016J06 gene	NA		F730016J06Rik
ENSMUSG00000038295	12.4405	5.44061	5.61895	2.41512	2.33595	1.22401	0.171589	0.999997	1782	autophagy related 9B	213948	213948	Atg9b
ENSMUSG00000056214	125.044	305.687	62.4456	153.551	-2.30235	-1.20311	0.165417	0.999997	1783	par-6 family cell polarity regulator gamma	93737	93737	Pard6g
ENSMUSG00000082208	0.371933	0.890085	0.342864	0.239241	-2.40193	-1.26419	0.185313	0.999997	1784	predicted gene 15379	NA		Gm15379
ENSMUSG00000026532	1.56202	0.643937	1.61232	0.690838	2.90599	1.53903	0.243749	0.999997	1785	spectrin alpha, erythrocytic 1	20739	20739	Spta1
ENSMUSG00000032064	12.7758	27.8101	14.6726	19.5007	-3.20592	-1.68074	0.267484	0.999997	1786	DIX domain containing 1	330938	330938	Dixdc1
ENSMUSG00000111389	0.00193881	0.034876	0.00335812	0.0409614	-3.07806	-1.62202	0.258531	0.999997	1787		NA		AC164092.4
ENSMUSG00000085448	3.63739	1.78942	1.08356	0.598168	2.12718	1.08894	0.127478	0.999997	1788	predicted gene 13963	NA		Gm13963
ENSMUSG00000108371	30.7485	71.2009	18.4428	38.5372	-2.33202	-1.22158	0.171911	0.999997	1789	predicted gene 45050	NA		Gm45050
ENSMUSG00000026069	1.86981	0.59753	2.57913	0.741958	3.74571	1.90524	0.300891	0.999997	1790	interleukin 1 receptor-like 1	17082	17082	Il1rl1
ENSMUSG00000043068	12.4034	6.51434	5.37744	5.24046	2.48491	1.31319	0.198588	0.999997	1791	family with sequence similarity 89, member A	69627	69627	Fam89a
ENSMUSG00000063919	0.0777433	0.0379113	0.0523674	0.0361233	2.57617	1.36523	0.211267	0.999997	1792	serine/arginine repetitive matrix 4	68955	68955	Srrm4
ENSMUSG00000105337	0.214579	0.523301	0.223549	0.614609	-3.23334	-1.69302	0.271902	0.999997	1793	predicted gene 43832	NA		Gm43832
ENSMUSG00000071181	0.715678	1.40938	0.599324	0.312883	-2.43057	-1.2813	0.192209	0.999997	1794	RIKEN cDNA 3830408C21 gene	NA		3830408C21Rik
ENSMUSG00000018849	4.86108	3.36381	4.27346	3.74406	2.5978	1.37729	0.214555	0.999997	1795	WW, C2 and coiled-coil domain containing 1	211652	211652	Wwc1
ENSMUSG00000018927	3.67218	1.02285	4.0179	0.817149	2.98922	1.57977	0.25283	0.999997	1796	chemokine (C-C motif) ligand 6	20305	20305	Ccl6
ENSMUSG00000027238	0.0828413	0.0415832	0.0281767	0.0359751	2.35413	1.2352	0.177232	0.999997	1797	FERM domain containing 5	228564	228564	Frmd5
ENSMUSG00000041361	18.7663	31.8552	14.2216	8.67347	-2.25004	-1.16995	0.157067	0.999997	1798	myocardial zonula adherens protein	102371	102371	Myzap
ENSMUSG00000102202	0.0350702	0.12042	0.0607433	0.0912514	-2.57329	-1.36362	0.212501	0.999997	1799	predicted gene, 33280	NA		Gm33280
ENSMUSG00000027253	5.82896	11.8566	4.80376	6.17982	-2.41394	-1.27139	0.189728	0.999997	1800	low density lipoprotein receptor-related protein 4	228357	228357	Lrp4
ENSMUSG00000045991	0.08842	0.394788	0.0649754	0.45934	-2.73286	-1.45041	0.229183	0.999997	1801	one cut domain, family member 2	225631	225631	Onecut2
ENSMUSG00000074207	0.140598	0.666597	0.147413	0.800929	-3.1749	-1.66671	0.268377	0.999997	1802	alcohol dehydrogenase 1 (class I)	11522	11522	Adh1
ENSMUSG00000111163	0.0465997	0.159916	0.0526581	0.138119	-2.81352	-1.49237	0.238177	0.999997	1803		NA		AC125374.2
ENSMUSG00000033318	13.8151	33.4523	4.29464	15.2627	-2.24284	-1.16533	0.155783	0.999997	1804	glutathione S-transferase, theta 2	14872	14872	Gstt2
ENSMUSG00000018566	0.197632	0.0894762	0.0754158	0.107416	2.53652	1.34285	0.206492	0.999997	1805	solute carrier family 2 (facilitated glucose transporter), member 4	20528	20528	Slc2a4
ENSMUSG00000087361	0.311985	0.849398	0.179254	0.554015	-2.53215	-1.34036	0.206273	0.999997	1806	RIKEN cDNA 0610043K17 gene	NA		0610043K17Rik
ENSMUSG00000111341	0.266374	0.105582	0.294052	0.100603	2.78912	1.47981	0.236921	0.999997	1807		NA		AC165080.3
ENSMUSG00000110834	25.9709	13.554	4.10254	3.13855	2.11578	1.08119	0.128069	0.999997	1808		NA		CAAA01180111.2
ENSMUSG00000018986	23.494	52.7691	20.9891	30.1031	-2.57942	-1.36705	0.214767	0.999997	1809	schlafen 3	20557	20557	Slfn3
ENSMUSG00000022754	14.2402	7.2132	11.6305	3.9015	2.37302	1.24672	0.18492	0.999997	1810	transmembrane protein 45a	56277	56277	Tmem45a
ENSMUSG00000047409	30.5225	67.6712	12.7729	29.4885	-2.15323	-1.10651	0.138553	0.999997	1811	CTD (carboxy-terminal domain, RNA polymerase II, polypeptide A) small phosphatase-like	69274	69274	Ctdspl
ENSMUSG00000109555	0.916566	2.00403	0.563918	0.612693	-2.27308	-1.18465	0.164305	0.999997	1812	predicted gene 44891	NA		Gm44891
ENSMUSG00000036019	7.88881	3.21247	2.60442	1.12783	2.38503	1.25401	0.188238	0.999997	1813	transmembrane and tetratricopeptide repeat containing 2	278279	278279	Tmtc2
ENSMUSG00000034768	0.0602286	0.194047	0.104319	0.0898872	-2.71562	-1.44128	0.228634	0.999997	1814	ankyrin repeat and SOCS box-containing 16	217217	217217	Asb16
ENSMUSG00000038152	4.02909	1.53013	2.86025	0.959589	2.40179	1.26411	0.190241	0.999997	1815	RIKEN cDNA 5033430I15 gene	NA		5033430I15Rik
ENSMUSG00000043811	0.0687198	0.664779	0.119026	0.848134	-3.19686	-1.67666	0.272413	0.999997	1816	reticulon 4 receptor	65079	65079	Rtn4r
ENSMUSG00000076928	0.329418	0.0699533	0.312626	0.121163	2.73453	1.45129	0.231873	0.999997	1817	T cell receptor alpha constant	NA		Trac
ENSMUSG00000016520	24.1769	68.8041	8.09976	55.9385	-2.31571	-1.21146	0.175718	0.999997	1818	ligand of numb-protein X 2	140887	140887	Lnx2
ENSMUSG00000047259	1.54389	0.91829	1.1897	1.23254	3.13439	1.64819	0.267535	0.999997	1819	melanocortin 4 receptor	17202	17202	Mc4r
ENSMUSG00000024675	0.419948	0.179204	0.15504	0.155036	2.56527	1.35911	0.214784	0.999997	1820	membrane-spanning 4-domains, subfamily A, member 4C	64380	64380	Ms4a4c
ENSMUSG00000010154	2.68878	1.39989	0.557652	1.26229	2.27582	1.18639	0.167505	0.999997	1821	spire homolog 2 (Drosophila)	234857	234857	Spire2
ENSMUSG00000045868	0.866305	0.452706	0.385895	0.478044	2.8683	1.5202	0.246338	0.999997	1822	GTPase, very large interferon inducible 1	74558	74558	Gvin1
ENSMUSG00000054266	0.380511	0.0554864	0.659065	0.0961052	3.10774	1.63587	0.265633	0.999997	1823	serine (or cysteine) peptidase inhibitor, clade B, member 9d	20726	20726	Serpinb9d
ENSMUSG00000037731	0.0570351	0.622261	0.0177555	0.951257	-3.369	-1.75232	0.284923	0.999997	1824	thymocyte selection associated family member 2	230787	230787	Themis2
ENSMUSG00000019256	33.9773	67.6428	39.8753	35.929	-2.83787	-1.50481	0.24327	0.999997	1825	aryl-hydrocarbon receptor	11622	11622	Ahr
ENSMUSG00000045498	0.901463	2.0306	0.272208	0.573909	-2.06504	-1.04617	0.118327	0.999997	1826	protocadherin beta 3	93874	93874	Pcdhb3
ENSMUSG00000113922	0.13069	0.72831	0.142013	1.01064	-2.81066	-1.49091	0.24162	0.999997	1827		NA		AC131743.5
ENSMUSG00000074673	0.179971	0.0721091	0.124521	0.0625928	2.5544	1.35298	0.213599	0.999997	1828	tubulin tyrosine ligase-like family, member 9	74711	74711	Ttll9
ENSMUSG00000027737	9.34448	4.11293	8.53	1.82045	2.36243	1.24027	0.185749	0.999997	1829	solute carrier family 7 (cationic amino acid transporter, y+ system), member 11	26570	26570	Slc7a11
ENSMUSG00000030162	1.94595	0.944161	1.11896	0.706404	2.50448	1.32451	0.205819	0.999997	1830	oxidized low density lipoprotein (lectin-like) receptor 1	108078	108078	Olr1
ENSMUSG00000026579	1.92767	1.09609	0.940528	1.0787	2.40771	1.26766	0.193843	0.999997	1831	coagulation factor V	14067	14067	F5
ENSMUSG00000032128	4.35149	6.95235	3.70427	1.07255	-2.22895	-1.15636	0.157509	0.999997	1832	roundabout guidance receptor 3	19649	19649	Robo3
ENSMUSG00000029861	0.413203	0.168855	0.278823	0.124597	2.71671	1.44186	0.232047	0.999997	1833	family with sequence similarity 131, member B	76156	76156	Fam131b
ENSMUSG00000000686	0.697208	0.314981	0.172009	0.0327433	2.12571	1.08794	0.134707	0.999997	1834	abhydrolase domain containing 15	67477	67477	Abhd15
ENSMUSG00000021211	0.546977	0.242572	0.17606	0.197253	2.48956	1.31589	0.204754	0.999997	1835	aldo-keto reductase family 1, member C12	622402	622402	Akr1c12
ENSMUSG00000021338	4.22419	2.13964	0.25644	0.480365	2.05163	1.03677	0.115838	0.999997	1836	capping protein regulator and myosin 1 linker 1	68732	68732	Carmil1
ENSMUSG00000095042	0.411856	0.532052	0.358632	0.446225	-3.10646	-1.63527	0.267649	0.999997	1837	predicted gene 12537	NA		Gm12537
ENSMUSG00000114068	2.85517	1.38554	1.15871	0.13957	2.13247	1.09253	0.136945	0.999997	1838		NA		CT010431.1
ENSMUSG00000004891	146.317	80.0704	25.9878	53.65	2.47966	1.31014	0.203887	0.999997	1839	nestin	18008	18008	Nes
ENSMUSG00000063704	10.0526	19.0404	7.48276	4.17238	-2.304	-1.20414	0.17652	0.999997	1840	mitogen-activated protein kinase 15	332110	332110	Mapk15
ENSMUSG00000097592	0.751373	1.17073	0.927365	0.380114	-2.63602	-1.39836	0.225579	0.999997	1841	RIKEN cDNA 4930500F10 gene	NA		4930500F10Rik
ENSMUSG00000078519	1.89183	0.403067	1.72972	0.698133	3.26175	1.70565	0.279433	0.999997	1842	RIKEN cDNA 2310026L22 gene	NA		2310026L22Rik
ENSMUSG00000059213	0.143935	0.0468104	0.0367101	0.0126388	2.52335	1.33534	0.211343	0.999997	1843	dendrin	13199	13199	Ddn
ENSMUSG00000102070	0.723533	0.21442	0.380658	0.18869	2.6486	1.40523	0.228431	0.999997	1844	predicted gene 28661	NA		Gm28661
ENSMUSG00000022902	9.45461	4.65112	7.28446	4.04798	3.19507	1.67585	0.276105	0.999997	1845	stefin A2	20862	20862	Stfa2
ENSMUSG00000093042	6.42805	2.11735	3.91997	2.06344	2.48703	1.31442	0.206716	0.999997	1846	microRNA 3109	NA		Mir3109
ENSMUSG00000103146	0.0692005	0.179588	0.0123695	0.0532619	-2.34979	-1.23253	0.188047	0.999997	1847	predicted gene, 37745	NA		Gm37745
ENSMUSG00000024846	3.10741	0.92332	2.4273	0.326906	2.88021	1.52618	0.253921	0.999997	1848	cystatin E/M	73720	73720	Cst6
ENSMUSG00000062380	4.38061	2.44822	3.92592	2.52193	3.28394	1.71543	0.284802	0.999997	1849	tubulin, beta 3 class III	22152	22152	Tubb3
ENSMUSG00000027171	61.9223	30.7794	7.01733	12.9976	2.19822	1.13634	0.155491	0.999997	1850	proline rich Gla (G-carboxyglutamic acid) 4 (transmembrane)	228413	228413	Prrg4
ENSMUSG00000094626	0.179602	0.0427344	0.201903	0.0740182	3.9696	1.989	0.321531	0.999997	1851	cat eye syndrome chromosome region, candidate 6	94047	94047	Cecr6
ENSMUSG00000025089	3.1156	2.37099	2.50491	3.25464	3.14479	1.65296	0.275413	0.999997	1852	glial cell line derived neurotrophic factor family receptor alpha 1	14585	14585	Gfra1
ENSMUSG00000026255	0.667615	0.221035	0.605662	0.195118	3.5961	1.84643	0.306173	0.999997	1853	EF hand domain containing 1	98363	98363	Efhd1
ENSMUSG00000037990	0.149914	0.0393173	0.184909	0.0160273	2.91256	1.54229	0.258214	0.999997	1854	SH3 domain containing ring finger 3	237353	237353	Sh3rf3
ENSMUSG00000105877	1.11964	0.495452	0.825433	0.504897	2.47819	1.30929	0.20937	0.999997	1855	predicted gene 42479	NA		Gm42479
ENSMUSG00000022505	7.536	3.79003	9.50218	3.16003	3.8305	1.93753	0.317088	0.999997	1856	epithelial membrane protein 2	13731	13731	Emp2
ENSMUSG00000025064	0.0484066	0.201471	0.0420515	0.213483	-2.71592	-1.44144	0.239282	0.999997	1857	collagen, type XVII, alpha 1	12821	12821	Col17a1
ENSMUSG00000073565	0.374112	0.223364	0.27773	0.297712	2.68967	1.42743	0.237497	0.999997	1858	proline rich 16	71373	71373	Prr16
ENSMUSG00000110706	0.692501	0.462104	0.290764	0.615918	2.56505	1.35899	0.222253	0.999997	1859	predicted gene 45709	NA		Gm45709
ENSMUSG00000065061	5.17592	2.03383	0.438114	0.82907	2.33813	1.22535	0.188885	0.999997	1860	predicted gene, 22884	NA		Gm22884
ENSMUSG00000024621	1.10465	0.57394	0.44734	0.354877	2.21154	1.14505	0.161336	0.999997	1861	colony stimulating factor 1 receptor	12978	12978	Csf1r
ENSMUSG00000023349	2.53256	0.434987	2.80518	0.439665	3.60037	1.84815	0.30807	0.999997	1862	C-type lectin domain family 4, member n	56620	56620	Clec4n
ENSMUSG00000078954	1.31861	1.4563	1.96232	0.894636	-3.13868	-1.65016	0.2765	0.999997	1863	Rho GTPase activating protein 8	73167	73167	Arhgap8
ENSMUSG00000102151	0.678364	1.81832	0.395665	1.58236	-2.37642	-1.24879	0.196967	0.999997	1864	predicted gene, 37472	NA		Gm37472
ENSMUSG00000005628	1.06111	2.00322	0.95907	0.956544	-2.31286	-1.20968	0.185847	0.999997	1865	tropomodulin 4	50874	50874	Tmod4
ENSMUSG00000099634	2.32341	0.467932	2.7672	0.405763	2.87123	1.52167	0.257697	0.999997	1866	predicted gene 29462	NA		Gm29462
ENSMUSG00000080848	0.992659	0.571035	0.632307	0.495168	2.61686	1.38784	0.229277	0.999997	1867	predicted pseudogene 9385	NA		Gm9385
ENSMUSG00000097088	0.200491	0.0811109	0.121221	0.0707374	2.48696	1.31438	0.213523	0.999997	1868	predicted gene, 26615	NA		Gm26615
ENSMUSG00000084785	0.0982286	0.126961	0.154777	0.0627135	-2.73261	-1.45028	0.24336	0.999997	1869	predicted gene 13972	NA		Gm13972
ENSMUSG00000046402	4.10149	1.87615	2.55526	1.18188	2.43359	1.28308	0.205027	0.999997	1870	retinol binding protein 1, cellular	19659	19659	Rbp1
ENSMUSG00000036158	14.7323	31.3342	6.32536	19.4222	-2.15157	-1.10539	0.150959	0.999997	1871	prickle planar cell polarity protein 1	106042	106042	Prickle1
ENSMUSG00000040152	3154.7	972.666	2631.58	1168.42	3.2947	1.72015	0.291487	0.999997	1872	thrombospondin 1	21825	21825	Thbs1
ENSMUSG00000105558	7.27994	9.89793	12.0916	8.48434	-3.89532	-1.96174	0.323954	0.999997	1873	predicted gene 5855	NA		Gm5855
ENSMUSG00000085016	0.230142	1.16051	0.15606	1.18148	-2.94552	-1.55852	0.263929	0.999997	1874	predicted gene 11335	NA		Gm11335
ENSMUSG00000014599	195.36	73.1811	112.472	39.1664	2.60076	1.37893	0.229245	0.999997	1875	colony stimulating factor 1 (macrophage)	12977	12977	Csf1
ENSMUSG00000035799	2.13113	0.630176	2.80425	0.564886	3.21114	1.68309	0.285722	0.999997	1876	twist basic helix-loop-helix transcription factor 1	22160	22160	Twist1
ENSMUSG00000026308	0.367248	0.245706	0.466848	0.371923	3.59981	1.84792	0.310637	0.999997	1877	kelch-like 30	70788	70788	Klhl30
ENSMUSG00000074071	0.371759	0.242361	0.113065	0.252209	2.96212	1.56663	0.265947	0.999997	1878	family with sequence similarity 169, member B	434197	434197	Fam169b
ENSMUSG00000035576	0.104466	0.0348246	0.0459908	0.0306458	2.41893	1.27437	0.20419	0.999997	1879	l(3)mbt-like (Drosophila)	241764	241764	L3mbtl1
ENSMUSG00000067545	0.188887	0.441402	0.180557	0.119178	-2.48581	-1.31372	0.215701	0.999997	1880	olfactory receptor 1419	257938	257938	Olfr1419
ENSMUSG00000036136	101.664	58.4499	31.7397	47.9558	2.37384	1.24722	0.199055	0.999997	1881	family with sequence similarity 110, member C	104943	104943	Fam110c
ENSMUSG00000042476	1.77357	3.01849	1.46569	0.569496	-2.20647	-1.14174	0.164422	0.999997	1882	ATP-binding cassette, sub-family B (MDR/TAP), member 4	18670	18670	Abcb4
ENSMUSG00000060791	11.4092	22.6528	5.33033	10.0546	-2.17475	-1.12085	0.158566	0.999997	1883	glia maturation factor, gamma	63986	63986	Gmfg
ENSMUSG00000017723	1.10546	0.388924	0.740563	0.673637	2.98624	1.57833	0.269757	0.999997	1884	WAP four-disulfide core domain 2	67701	67701	Wfdc2
ENSMUSG00000104723	1.20664	0.425261	0.879398	0.482192	2.60457	1.38105	0.231734	0.999997	1885	predicted gene 43106	NA		Gm43106
ENSMUSG00000078607	1.06313	3.22702	0.380595	2.11377	-2.40639	-1.26687	0.203858	0.999997	1886	RIKEN cDNA 1810010H24 gene	69066	69066	1810010H24Rik
ENSMUSG00000106568	2.54656	0.618991	1.4252	0.252326	2.67125	1.41752	0.24113	0.999997	1887	predicted gene 42814	NA		Gm42814
ENSMUSG00000064344	9.13458	3.34181	3.5335	3.5163	2.61328	1.38586	0.232267	0.999997	1888	mitochondrially encoded tRNA methionine	NA		mt-Tm
ENSMUSG00000056673	8.4	9.75775	7.43927	5.38194	-4.40178	-2.13809	0.342852	0.999997	1889	lysine (K)-specific demethylase 5D	20592	20592	Kdm5d
ENSMUSG00000087739	5.22759	9.85272	3.80525	3.94574	-2.34163	-1.22751	0.194988	0.999997	1890	predicted gene, 24644	NA		Gm24644
ENSMUSG00000064672	6.96939	11.8339	4.37467	2.30526	-2.27119	-1.18345	0.183315	0.999997	1891	predicted gene, 22806	NA		Gm22806
ENSMUSG00000051627	4.29207	2.14105	0.731292	0.919886	2.16679	1.11556	0.157629	0.999997	1892	histone cluster 1, H1e	50709	50709	Hist1h1e
ENSMUSG00000027750	8.62985	7.1219	7.15249	10.5801	4.21868	2.07679	0.339307	0.999997	1893	periostin, osteoblast specific factor	50706	50706	Postn
ENSMUSG00000093559	0.313673	0.289239	0.517779	0.172043	-2.87077	-1.52144	0.260594	0.999997	1894	predicted gene 20705	NA		Gm20705
ENSMUSG00000082896	0.283871	0.0983011	0.0172559	0.0108039	2.36728	1.24323	0.199814	0.999997	1895	predicted gene 5844	NA		Gm5844
ENSMUSG00000111218	0.312749	1.22182	0.541697	0.728514	-2.63261	-1.39649	0.237474	0.999997	1896		NA		AC145736.2
ENSMUSG00000025738	0.731223	0.248839	0.728334	0.0697195	2.65323	1.40775	0.240325	0.999997	1897	F-box and leucine-rich repeat protein 16	214931	214931	Fbxl16
ENSMUSG00000058056	70.1826	37.8534	13.0692	19.3555	2.16703	1.11572	0.158564	0.999997	1898	palladin, cytoskeletal associated protein	72333	72333	Palld
ENSMUSG00000024481	6.3098	7.34985	10.49	10.2199	-4.37386	-2.12891	0.344227	0.999997	1899	laeverin	74574	74574	Lvrn
ENSMUSG00000090698	222.475	477.67	119.635	191.198	-2.17726	-1.12251	0.161869	0.999997	1900	apolipoprotein L domain containing 1	381823	381823	Apold1
ENSMUSG00000027316	0.346771	0.215126	0.270717	0.227448	3.06794	1.61727	0.278189	0.999997	1901	glial cell line derived neurotrophic factor family receptor alpha 4	14588	14588	Gfra4
ENSMUSG00000024998	4.0046	13.4169	2.57825	9.04013	-2.44428	-1.28941	0.21246	0.999997	1902	phospholipase C, epsilon 1	74055	74055	Plce1
ENSMUSG00000002076	0.332941	0.130002	0.164487	0.0643789	2.24266	1.16521	0.176538	0.999997	1903	heat shock transcription factor 2 binding protein	74377	74377	Hsf2bp
ENSMUSG00000016386	0.244543	0.157389	0.227432	0.136479	2.85145	1.51169	0.258921	0.999997	1904	metallophosphoesterase domain containing 2	77015	77015	Mpped2
ENSMUSG00000083856	0.949954	2.13948	0.694385	0.590488	-2.39585	-1.26054	0.204151	0.999997	1905	predicted gene 13886	NA		Gm13886
ENSMUSG00000037855	23.045	12.3909	2.18401	4.24885	1.94551	0.960152	0.0972119	0.999997	1906	zinc finger protein 365	216049	216049	Zfp365
ENSMUSG00000032193	18.3487	42.3161	10.0983	16.515	-2.33937	-1.22612	0.195911	0.999997	1907	low density lipoprotein receptor	16835	16835	Ldlr
ENSMUSG00000086022	0.141331	0.0436901	0.126568	0.0756734	3.18274	1.67027	0.288358	0.999997	1908	RAD51 associated protein 2	209550	209550	Rad51ap2
ENSMUSG00000004885	0.599993	0.394751	0.229948	0.476826	2.43864	1.28608	0.213369	0.999997	1909	cellular retinoic acid binding protein II	12904	12904	Crabp2
ENSMUSG00000020679	1.03033	1.90244	0.886132	0.360224	-2.33549	-1.22373	0.195476	0.999997	1910	HNF1 homeobox B	21410	21410	Hnf1b
ENSMUSG00000030413	22.4862	35.3496	27.7419	29.1712	-2.68916	-1.42715	0.245736	0.999997	1911	peptidoglycan recognition protein 1	21946	21946	Pglyrp1
ENSMUSG00000046157	2.80747	5.56648	0.987742	1.86283	-2.02458	-1.01762	0.122857	0.999997	1912	transmembrane protein 229B	268567	268567	Tmem229b
ENSMUSG00000034687	0.0253831	0.0149967	0.0150773	0.0168565	2.65539	1.40893	0.243002	0.999997	1913	Fraser extracellular matrix complex subunit 1	231470	231470	Fras1
ENSMUSG00000107379	3.4751	1.31823	2.70315	0.17033	2.53635	1.34275	0.226957	0.999997	1914	predicted gene 43126	NA		Gm43126
ENSMUSG00000038059	11.5372	6.43582	5.60808	3.90859	2.31923	1.21365	0.194892	0.999997	1915	small integral membrane protein 3	106878	106878	Smim3
ENSMUSG00000046610	0.324867	0.148292	0.118564	0.082172	2.33669	1.22447	0.196423	0.999997	1916	O-acyltransferase like	319888	319888	Oacyl
ENSMUSG00000020992	0.393308	0.189738	0.137069	0.138037	2.34751	1.23113	0.198609	0.999997	1917	RIKEN cDNA 4930512B01 gene	NA		4930512B01Rik
ENSMUSG00000034837	0.426643	0.198047	0.257176	0.172957	2.53235	1.34048	0.226856	0.999997	1918	guanine nucleotide binding protein, alpha transducing 1	14685	14685	Gnat1
ENSMUSG00000103926	0.556708	0.244278	0.113221	0.0688129	2.2535	1.17217	0.181368	0.999997	1919	predicted gene, 37894	NA		Gm37894
ENSMUSG00000042379	977.032	534.221	495.832	633.039	2.97726	1.57399	0.274013	0.999997	1920	endothelial cell-specific molecule 1	71690	71690	Esm1
ENSMUSG00000024168	167.896	383.022	98.9738	168.867	-2.27059	-1.18307	0.186703	0.999997	1921	transmembrane protein 204	407831	407831	Tmem204
ENSMUSG00000025481	0.621699	0.27457	0.410438	0.35682	2.52478	1.33616	0.226361	0.999997	1922	urate (5-hydroxyiso-) hydrolase	76974	76974	Urah
ENSMUSG00000025810	8.47571	3.12287	4.05539	1.37184	2.71718	1.44211	0.249598	0.999997	1923	neuropilin 1	18186	18186	Nrp1
ENSMUSG00000052673	3.8751	1.70993	0.459848	0.788771	2.36657	1.2428	0.202589	0.999997	1924	predicted gene 9887	NA		Gm9887
ENSMUSG00000027254	3.77034	1.65698	5.28435	1.48405	3.62955	1.85979	0.318444	0.999997	1925	microtubule-associated protein 1 A	17754	17754	Map1a
ENSMUSG00000084215	0.933173	0.384764	0.638378	0.337971	2.56733	1.36027	0.232879	0.999997	1926	predicted gene 11814	NA		Gm11814
ENSMUSG00000023266	3.38059	8.67807	1.52876	4.13705	-2.37491	-1.24787	0.203979	0.999997	1927	fibroblast growth factor receptor substrate 3	107971	107971	Frs3
ENSMUSG00000060188	6.14733	15.0716	5.88272	12.6298	-2.6919	-1.42863	0.248334	0.999997	1928	chemokine (C-X-C motif) ligand 17	232983	232983	Cxcl17
ENSMUSG00000106826	0.148969	0.112102	0.151384	0.125985	2.98341	1.57696	0.274911	0.999997	1929	predicted gene 42583	NA		Gm42583
ENSMUSG00000038349	2.85869	0.61044	2.85983	0.357196	3.82688	1.93617	0.328106	0.999997	1930	phospholipase C-like 1	227120	227120	Plcl1
ENSMUSG00000107881	11.8052	5.96189	0.838374	3.62489	2.26644	1.18043	0.186305	0.999997	1931	predicted gene, 44250	NA		Gm44250
ENSMUSG00000020262	27.073	73.8249	11.5698	56.0968	-2.27752	-1.18746	0.189213	0.999997	1932	adenosine deaminase, RNA-specific, B1	110532	110532	Adarb1
ENSMUSG00000056313	94.2667	38.2749	64.7929	20.9659	2.44956	1.29252	0.217162	0.999997	1933	RIKEN cDNA 1810011O10 gene	69068	69068	1810011O10Rik
ENSMUSG00000038552	4.99954	10.2653	3.00467	1.92799	-2.25662	-1.17416	0.185025	0.999997	1934	fibronectin type III domain containing 4	64339	64339	Fndc4
ENSMUSG00000040537	0.260853	0.123174	0.188768	0.0846212	2.36711	1.24313	0.203868	0.999997	1935	a disintegrin and metallopeptidase domain 22	11496	11496	Adam22
ENSMUSG00000091705	0.321345	0.582814	0.354946	0.194881	-2.64203	-1.40164	0.243729	0.999997	1936	histocompatibility 2, Q region locus 2	15013	15013	H2-Q2
ENSMUSG00000102055	2.96312	1.30498	2.18916	0.663854	2.32579	1.21772	0.197408	0.999997	1937	predicted gene 28913	NA		Gm28913
ENSMUSG00000064369	8.08881	1.58934	7.02686	1.51439	2.90983	1.54093	0.270763	0.999997	1938	mitochondrially encoded tRNA glutamic acid	NA		mt-Te
ENSMUSG00000113045	0.471165	0.173795	0.134813	0.165598	2.68298	1.42384	0.24878	0.999997	1939		NA		AC154219.1
ENSMUSG00000086513	0.829612	0.46575	0.292971	0.511815	3.06196	1.61445	0.282937	0.999997	1940	RIKEN cDNA 9130208D14 gene	NA		9130208D14Rik
ENSMUSG00000025068	230.983	112.588	88.8189	30.2989	2.07179	1.05088	0.140144	0.999997	1941	glutathione S-transferase omega 1	14873	14873	Gsto1
ENSMUSG00000040812	0.148296	0.0257322	0.228951	0.0302221	3.26156	1.70556	0.300599	0.999997	1942	ATP/GTP binding protein-like 2	271813	271813	Agbl2
ENSMUSG00000043456	0.384819	0.452244	0.353431	0.742158	3.62218	1.85686	0.320824	0.999997	1943	zinc finger protein 536	243937	243937	Zfp536
ENSMUSG00000027004	28.1732	14.2655	15.1717	13.1646	2.63063	1.39541	0.24308	0.999997	1944	frizzled-related protein	20378	20378	Frzb
ENSMUSG00000027978	19.8056	12.074	7.09787	9.01396	2.35495	1.2357	0.202896	0.999997	1945	protease, serine 12 neurotrypsin (motopsin)	19142	19142	Prss12
ENSMUSG00000060882	3.41607	1.53856	2.9604	1.25736	2.73002	1.44891	0.254675	0.999997	1946	potassium voltage-gated channel, Shal-related family, member 2	16508	16508	Kcnd2
ENSMUSG00000104325	0.10566	0.435838	0.106729	0.302363	-2.49166	-1.31711	0.225362	0.999997	1947	predicted gene, 37321	NA		Gm37321
ENSMUSG00000102599	0.456208	0.897011	0.200714	0.28434	-2.17173	-1.11884	0.167974	0.999997	1948	predicted gene, 38386	NA		Gm38386
ENSMUSG00000097793	0.718405	1.46456	0.145828	0.24405	-2.01256	-1.00903	0.124394	0.999997	1949	predicted gene, 17259	NA		Gm17259
ENSMUSG00000075334	1.42815	0.408174	1.18099	0.264622	2.81459	1.49292	0.261522	0.999997	1950	reprimo, TP53 dependent G2 arrest mediator candidate	67874	67874	Rprm
ENSMUSG00000081887	1.25398	0.645198	0.224312	0.462239	2.24226	1.16495	0.18361	0.999997	1951	predicted gene 12097	NA		Gm12097
ENSMUSG00000043336	201.362	108.102	26.9234	58.2866	2.23866	1.16264	0.183321	0.999997	1952	filamin A interacting protein 1-like	78749	78749	Filip1l
ENSMUSG00000029370	0.5142	0.0994018	0.447868	0.0832872	3.33467	1.73754	0.306643	0.999997	1953	Ras association (RalGDS/AF-6) domain family member 6	73246	73246	Rassf6
ENSMUSG00000106464	0.471586	0.202461	0.169869	0.0929643	2.42245	1.27647	0.215207	0.999997	1954	RIKEN cDNA C130083M11 gene	NA		C130083M11Rik
ENSMUSG00000072612	2.51765	1.23026	0.601638	0.700675	2.17049	1.11802	0.168119	0.999997	1955	predicted gene 10382	NA		Gm10382
ENSMUSG00000000739	9.7752	12.3494	9.67181	9.47489	-2.56699	-1.36008	0.237088	0.999997	1956	sulfotransferase family 5A, member 1	57429	57429	Sult5a1
ENSMUSG00000033768	3.32758	10.9433	1.34595	6.38209	-2.31612	-1.21171	0.198536	0.999997	1957	neurexin II	18190	18190	Nrxn2
ENSMUSG00000020811	16.6007	29.2081	8.37739	8.12413	-2.08117	-1.05739	0.145069	0.999997	1958	WSC domain containing 1	216881	216881	Wscd1
ENSMUSG00000062785	1.63706	0.909543	1.23256	0.685221	2.31674	1.21209	0.199032	0.999997	1959	potassium voltage gated channel, Shaw-related subfamily, member 3	16504	16504	Kcnc3
ENSMUSG00000029810	538.804	293.402	137.772	195.846	2.3943	1.2596	0.211467	0.999997	1960	transmembrane protein 176B	65963	65963	Tmem176b
ENSMUSG00000081249	0.886038	1.94275	0.534211	0.296466	-2.28885	-1.19462	0.195176	0.999997	1961	predicted gene 11517	NA		Gm11517
ENSMUSG00000040212	16.4843	8.46392	12.5848	6.68182	2.84517	1.50851	0.265098	0.999997	1962	epithelial membrane protein 3	13732	13732	Emp3
ENSMUSG00000095178	2.57854	4.77915	3.18251	1.73682	-2.44558	-1.29018	0.21983	0.999997	1963	predicted gene, 22716	NA		Gm22716
ENSMUSG00000103223	0.235942	0.0809691	0.127327	0.0968212	2.85412	1.51304	0.266237	0.999997	1964	predicted gene, 37730	NA		Gm37730
ENSMUSG00000022622	2.44436	5.35612	1.1596	3.028	-2.14195	-1.09892	0.160168	0.999997	1965	acrosin prepropeptide	11434	11434	Acr
ENSMUSG00000070867	2.99536	0.512829	3.71758	0.648671	4.70699	2.2348	0.364328	0.999997	1966	TraB domain containing 2B	666048	666048	Trabd2b
ENSMUSG00000026303	1.10977	0.735038	1.05466	1.14858	4.52635	2.17835	0.358885	0.999997	1967	melanophilin	171531	171531	Mlph
ENSMUSG00000004633	4.48602	7.00349	5.28186	3.55157	-2.59077	-1.37338	0.241213	0.999997	1968	chimerin 2	69993	69993	Chn2
ENSMUSG00000020123	0.215117	0.0504735	0.213783	0.0437677	3.45818	1.79001	0.315233	0.999997	1969	arginine vasopressin receptor 1A	54140	54140	Avpr1a
ENSMUSG00000050919	3.12272	0.736394	4.04078	0.823049	3.45	1.7866	0.314834	0.999997	1970	zinc finger protein 366	238803	238803	Zfp366
ENSMUSG00000055748	0.190512	0.0664667	0.113173	0.115124	3.16318	1.66138	0.29675	0.999997	1971	gasdermin C4	74548	74548	Gsdmc4
ENSMUSG00000030735	1.07258	0.479414	0.19282	0.169194	2.12532	1.08768	0.157479	0.999997	1972	predicted pseudogene 9755	NA		Gm9755
ENSMUSG00000044968	8.70137	18.2507	5.93311	7.98234	-2.29545	-1.19877	0.197323	0.999997	1973	N-acyl phosphatidylethanolamine phospholipase D	242864	242864	Napepld
ENSMUSG00000069601	0.593501	0.400866	0.650971	0.487025	2.75892	1.4641	0.26023	0.999997	1974	ankyrin 3, epithelial	11735	11735	Ank3
ENSMUSG00000038296	23.1304	81.5509	6.01676	80.3272	-2.36006	-1.23882	0.206653	0.999997	1975	UDP-N-acetyl-alpha-D-galactosamine:polypeptide N-acetylgalactosaminyltransferase 18	233733	233733	Galnt18
ENSMUSG00000105199	0.161662	0.40092	0.153579	0.186809	-2.73677	-1.45247	0.258348	0.999997	1976	predicted gene 43581	NA		Gm43581
ENSMUSG00000048814	0.395297	0.167931	0.195072	0.108918	2.86349	1.51778	0.271064	0.999997	1977	LON peptidase N-terminal domain and ring finger 2	381338	381338	Lonrf2
ENSMUSG00000031066	3.0349	6.73299	1.88759	2.94801	-2.33603	-1.22406	0.20332	0.999997	1978	ubiquitin specific peptidase 11	236733	236733	Usp11
ENSMUSG00000061603	0.518358	0.234463	0.518414	0.258918	3.19618	1.67635	0.301451	0.999997	1979	A kinase (PRKA) anchor protein 6	238161	238161	Akap6
ENSMUSG00000101952	1.14602	0.610271	0.177058	0.615754	2.59946	1.37821	0.244338	0.999997	1980	predicted gene 10550	NA		Gm10550
ENSMUSG00000041673	1.30679	2.8666	0.47449	1.25648	-2.12556	-1.08784	0.159084	0.999997	1981	leucine rich repeat containing 18	67580	67580	Lrrc18
ENSMUSG00000018983	2.7457	9.90282	0.79176	9.69797	-2.54827	-1.34952	0.237489	0.999997	1982	E2F transcription factor 2	242705	242705	E2f2
ENSMUSG00000042515	18.7592	8.70559	6.60427	2.74198	2.21421	1.14679	0.182759	0.999997	1983	melanoma associated antigen (mutated) 1-like 1	245631	245631	Mum1l1
ENSMUSG00000067818	21.7711	14.8196	12.1199	14.4192	4.00062	2.00022	0.342304	0.999997	1984	myosin, light polypeptide 9, regulatory	98932	98932	Myl9
ENSMUSG00000109957	2.10003	5.33752	1.55421	2.55259	-2.33531	-1.22361	0.203491	0.999997	1985	predicted gene 45353	NA		Gm45353
ENSMUSG00000026822	348.498	161.96	240.238	121.053	2.59716	1.37693	0.244964	0.999997	1986	lipocalin 2	16819	16819	Lcn2
ENSMUSG00000035394	0.177004	0.0518324	0.158895	0.044946	2.92972	1.55076	0.279063	0.999997	1987	cilia and flagella associated protein 53	74453	74453	Cfap53
ENSMUSG00000042359	1.22084	9.74768	0.551314	14.1867	-2.99468	-1.5824	0.284762	0.999997	1988	oxysterol binding protein-like 6	99031	99031	Osbpl6
ENSMUSG00000083087	5.51423	2.31042	3.18101	0.404791	2.09348	1.0659	0.153645	0.999997	1989	predicted gene 11249	NA		Gm11249
ENSMUSG00000021732	0.428084	0.600405	0.468334	0.931332	3.41832	1.77329	0.317074	0.999997	1990	fibroblast growth factor 10	14165	14165	Fgf10
ENSMUSG00000001985	0.0275641	0.154526	0.0477423	0.188485	-2.95167	-1.56153	0.281217	0.999997	1991	glutamate receptor, ionotropic, kainate 3	14807	14807	Grik3
ENSMUSG00000102147	0.46811	0.176116	0.0726429	0.0120655	2.31542	1.21127	0.203371	0.999997	1992	predicted gene, 38055	NA		Gm38055
ENSMUSG00000069516	49.5572	25.4087	42.2027	30.4885	2.69869	1.43226	0.258183	0.999997	1993	lysozyme 2	17105	17105	Lyz2
ENSMUSG00000102777	2.9578	1.5667	1.73029	1.2774	2.46523	1.30172	0.228047	0.999997	1994	predicted gene, 38161	NA		Gm38161
ENSMUSG00000042988	0.24151	0.371487	0.418308	0.525425	-3.75616	-1.90926	0.335346	0.999997	1995	notum pectinacetylesterase homolog (Drosophila)	77583	77583	Notum
ENSMUSG00000041757	0.0729181	0.0451811	0.0724392	0.062293	2.79129	1.48093	0.267461	0.999997	1996	pleckstrin homology domain containing, family A member 6	240753	240753	Plekha6
ENSMUSG00000030854	0.870486	1.35378	1.09897	0.671026	-3.24564	-1.6985	0.30824	0.999997	1997	protein tyrosine phosphatase, non-receptor type 5	19259	19259	Ptpn5
[truncated: 17,050 more rows]

## Sheet: ALL genes LA-Tg vs WT
Feature identifier	Mean expression level for the specified group	Mean expression level for the specified group	Standard deviation (of the expression) for the specified sample group	Standard deviation (of the expression) for the specified sample group	Expression ratio (fold change) between compared sample groups	Expression ratio (fold change) between the compared sample groups on the 2-logarithmic scale	T-test p value for the comparison between the sample groups	FDR adjusted p value for the comparison between the sample groups	Average ranking value based on both p value and fold change; value 1 is the strongest DE feature
ID	mean_LaTr	mean_WT	sd_LaTr	sd_WT	FC	logFC	P.Value	adj.P.Val	avgRank	Description	EntrezID	EntrezIDs	MGI_symbol
ENSMUSG00000113288	0.014456	0.54263	0.0250384	0.152859	-10.4719	-3.38845	0.000800156	0.999998	1		NA		AC164164.1
ENSMUSG00000021763	1.91045	24.5143	1.28909	14.9947	-11.2334	-3.48973	0.00934482	0.999998	2	cDNA sequence BC067074	NA		BC067074
ENSMUSG00000109317	0	0.212786	0	0.0930674	-8.70749	-3.12226	0.00697597	0.999998	3	predicted gene 45041	NA		Gm45041
ENSMUSG00000067356	0.0984056	1.31649	0.170444	0.301465	-9.51571	-3.25031	0.0114423	0.999998	4	RIKEN cDNA B430203G13 gene	NA		B430203G13Rik
ENSMUSG00000102989	0.0198282	0.556874	0.0343435	0.283286	-7.77199	-2.95828	0.00764037	0.999998	5	predicted gene, 38318	NA		Gm38318
ENSMUSG00000049202	0	1.32131	0	0.466315	-8.45965	-3.0806	0.0108296	0.999998	6	RIKEN cDNA 4930515G13 gene	NA		4930515G13Rik
ENSMUSG00000042589	0.0125958	0.0966601	0.0218166	0.0485588	-7.53795	-2.91417	0.013504	0.999998	7	cut-like homeobox 2	13048	13048	Cux2
ENSMUSG00000097178	0	0.126775	0	0.0516785	-7.34417	-2.8766	0.0130389	0.999998	8	RIKEN cDNA 2310002F09 gene	NA		2310002F09Rik
ENSMUSG00000054256	0.10436	0.38671	0.165835	0.0911358	-7.26959	-2.86187	0.0142932	0.999998	9	musashi RNA-binding protein 1	17690	17690	Msi1
ENSMUSG00000104060	0.0325545	0.434792	0.056386	0.17739	-7.63378	-2.9324	0.0178357	0.999998	10	predicted gene, 37954	NA		Gm37954
ENSMUSG00000086976	3.0076	0.369388	0.267868	0.322591	6.395	2.67694	0.00574264	0.999998	11	predicted gene 12316	NA		Gm12316
ENSMUSG00000070732	0.0965842	0.0100347	0.0110761	0.0173806	6.37315	2.67201	0.0066926	0.999998	12	RNA binding motif protein 44	329207	329207	Rbm44
ENSMUSG00000099230	1.56124	16.8413	2.70415	4.93089	-6.46292	-2.69219	0.0100652	0.999998	13	microRNA 6989	NA		Mir6989
ENSMUSG00000044976	0.102569	0	0.0984951	0	7.66443	2.93818	0.022768	0.999998	14	WD repeat domain 72	546144	546144	Wdr72
ENSMUSG00000106702	2.10432	0.269875	1.01349	0.467438	7.60893	2.92769	0.0251795	0.999998	15	predicted gene 42846	NA		Gm42846
ENSMUSG00000105217	0.0391969	0.505658	0.067891	0.175105	-6.33202	-2.66267	0.0153734	0.999998	16	predicted gene 42873	NA		Gm42873
ENSMUSG00000084701	0	4.9433	0	3.69975	-6.66163	-2.73587	0.0249386	0.999998	17	nuclear encoded rRNA 5S 87	NA		n-R5s87
ENSMUSG00000036353	0.460653	0.0316628	0.43153	0.0548415	6.53984	2.70925	0.0237673	0.999998	18	purinergic receptor P2Y, G-protein coupled 12	70839	70839	P2ry12
ENSMUSG00000104910	0	0.778354	0	0.629288	-9.39839	-3.23241	0.0357543	0.999998	19	predicted gene 43331	NA		Gm43331
ENSMUSG00000024186	0.0321702	0.364567	0.0557204	0.261361	-6.68478	-2.74088	0.0266087	0.999998	20	regulator of G-protein signaling 11	50782	50782	Rgs11
ENSMUSG00000085925	0.069907	0.260808	0.121083	0.134717	-8.6411	-3.11122	0.0359823	0.999998	21	retrotransposon-like 1	353326	353326	Rtl1
ENSMUSG00000103146	0.0290075	0.179588	0.0502425	0.0532619	-6.10114	-2.60908	0.0175651	0.999998	22	predicted gene, 37745	NA		Gm37745
ENSMUSG00000102383	0.0379298	0.253292	0.0656964	0.10334	-6.65324	-2.73406	0.0291119	0.999998	23	predicted gene, 38142	NA		Gm38142
ENSMUSG00000064796	0.0799691	1.5775	0.138511	0.680004	-5.80961	-2.53844	0.0201928	0.999998	24	telomerase RNA component	NA		Terc
ENSMUSG00000083340	0.210032	2.15695	0.363786	1.31252	-6.01179	-2.58779	0.0233456	0.999998	25	predicted gene 13156	NA		Gm13156
ENSMUSG00000098199	0	0.437601	0	0.220489	-5.6593	-2.50062	0.0186334	0.999998	26	predicted gene 9358	NA		Gm9358
ENSMUSG00000076928	0.776889	0.0699533	0.325404	0.121163	6.35845	2.66867	0.0280173	0.999998	27	T cell receptor alpha constant	NA		Trac
ENSMUSG00000096960	0.155624	0	0.117865	0	5.46915	2.45132	0.0156798	0.999998	28	RIKEN cDNA A230028O05 gene	NA		A230028O05Rik
ENSMUSG00000102782	0	0.0824516	0	0.0407278	-5.69596	-2.50994	0.0204682	0.999998	29	predicted gene, 37625	NA		Gm37625
ENSMUSG00000021974	0.0306882	0.340402	0.0266126	0.383013	-6.63178	-2.7294	0.0356436	0.999998	30	fibroblast growth factor 9	14180	14180	Fgf9
ENSMUSG00000030187	1.44497	0.184479	1.24685	0.0498094	5.54699	2.47171	0.0192302	0.999998	31	killer cell lectin-like receptor, subfamily A, member 2	16633	16633	Klra2
ENSMUSG00000113065	0.0840629	0.475479	0.145601	0.31962	-6.36187	-2.66945	0.0322101	0.999998	32		NA		AC131743.1
ENSMUSG00000086701	0.205427	1.65436	0.355809	0.364813	-5.13713	-2.36096	0.0174392	0.999998	33	predicted gene 13595	NA		Gm13595
ENSMUSG00000107966	0.00896552	0.2959	0.0155287	0.22491	-7.79878	-2.96325	0.048367	0.999998	34	predicted gene, 44001	NA		Gm44001
ENSMUSG00000112637	0.0124917	0.142708	0.0216363	0.0634927	-6.1884	-2.62957	0.0386709	0.999998	35		NA		AC124346.3
ENSMUSG00000045912	0	0.0481259	0	0.0169845	-4.76033	-2.25106	0.0149801	0.999998	36	C2 calcium-dependent domain containing 4C	237397	237397	C2cd4c
ENSMUSG00000104400	0	0.199089	0	0.106583	-6.52721	-2.70647	0.0457722	0.999998	37	predicted gene, 38010	NA		Gm38010
ENSMUSG00000105842	0.041865	0.31376	0.0725123	0.13209	-5.16303	-2.36822	0.028123	0.999998	38	predicted gene 43329	NA		Gm43329
ENSMUSG00000101059	0.375713	2.43363	0.650755	1.64638	-6.38074	-2.67372	0.0449005	0.999998	39	predicted gene 4017	NA		Gm4017
ENSMUSG00000046854	0.027033	0.266757	0.0468225	0.165118	-5.79301	-2.53431	0.0399507	0.999998	40	phosphatidylinositol-4-phosphate 5-kinase-like 1	227733	227733	Pip5kl1
ENSMUSG00000089789	0.0171553	0.127255	0.0297138	0.0297106	-4.93518	-2.3031	0.0261313	0.999998	41	retinol dehydrogenase 1 (all trans)	107605	107605	Rdh1
ENSMUSG00000039238	0	0.125512	0	0.0632404	-5.65792	-2.50027	0.0400147	0.999998	42	zinc finger protein 750	319530	319530	Zfp750
ENSMUSG00000025321	0.107525	0.608076	0.134505	0.489251	-6.74551	-2.75393	0.0573988	0.999998	43	integrin beta 8	320910	320910	Itgb8
ENSMUSG00000106432	0.493913	1.15133	0.750767	0.386994	-6.22665	-2.63846	0.0464208	0.999998	44	predicted gene 43259	NA		Gm43259
ENSMUSG00000105264	0.643184	2.50065	0.896485	0.859942	-6.85564	-2.77729	0.0593827	0.999998	45	predicted gene 42716	NA		Gm42716
ENSMUSG00000112969	4.81221	0.27093	4.81121	0.469264	7.39745	2.88703	0.0614422	0.999998	46		NA		AC156560.1
ENSMUSG00000078139	0.272417	0.0360489	0.107046	0.0624384	5.07572	2.34361	0.0380514	0.999998	47	cDNA sequence AK157302	NA		AK157302
ENSMUSG00000055653	0.182356	0.0257836	0.104172	0.0446586	4.75232	2.24863	0.0317605	0.999998	48	glypican 3	14734	14734	Gpc3
ENSMUSG00000102380	0.024472	0.22636	0.0423867	0.14534	-5.01636	-2.32664	0.0402682	0.999998	49	predicted gene, 38140	NA		Gm38140
ENSMUSG00000104479	0.231592	0.576578	0.366194	0.0187522	-5.33316	-2.41499	0.0441088	0.999998	50	predicted gene 10305	NA		Gm10305
ENSMUSG00000071550	0.312384	0.0522046	0.332323	0.090421	6.88814	2.78412	0.0653754	0.999998	51	cilia and flagella associated protein 44	212517	212517	Cfap44
ENSMUSG00000044122	0.0626992	0.309451	0.0543722	0.0340106	-4.73254	-2.24261	0.031704	0.999998	52	protein interacting with cyclin A1	216974	216974	Proca1
ENSMUSG00000017868	0.199597	0.0203277	0.171518	0.0352085	5.54868	2.47214	0.048053	0.999998	53	serum/glucocorticoid regulated kinase 2	27219	27219	Sgk2
ENSMUSG00000040140	0.00957998	0.0899005	0.016593	0.0253249	-4.55521	-2.18752	0.0202019	0.999998	54	tudor domain containing 6	210510	210510	Tdrd6
ENSMUSG00000043773	0.287546	0.0330433	0.195538	0.0572328	5.28238	2.40119	0.0446608	0.999998	55	RIKEN cDNA 1700048O20 gene	NA		1700048O20Rik
ENSMUSG00000097399	0.171527	0.719055	0.14877	0.237998	-4.73591	-2.24364	0.0351081	0.999998	56	predicted gene, 26555	NA		Gm26555
ENSMUSG00000044550	0.389906	0.0927789	0.190136	0.0884032	4.762	2.25157	0.0363701	0.999998	57	transcription elongation factor A (SII)-like 3	594844	594844	Tceal3
ENSMUSG00000094344	1.80131	0.233662	0.844106	0.404715	4.626	2.20976	0.0260174	0.999998	58	predicted gene 11942	NA		Gm11942
ENSMUSG00000109435	0.0779203	0.626309	0.0763102	0.391041	-4.72249	-2.23955	0.0353475	0.999998	59	predicted gene 7067	NA		Gm7067
ENSMUSG00000099876	3.50851	11.9585	6.07692	6.76353	-27.3929	-4.77573	0.0801701	0.999998	60	predicted gene 29650	NA		Gm29650
ENSMUSG00000037541	0.0152993	0.112579	0.00511719	0.0720283	-4.72356	-2.23988	0.0359714	0.999998	61	SH3/ankyrin domain gene 2	210274	210274	Shank2
ENSMUSG00000104821	0.263816	1.14929	0.310316	0.418725	-4.9961	-2.3208	0.0490901	0.999998	62	predicted gene 42481	NA		Gm42481
ENSMUSG00000074637	0.030868	0.860333	0.053465	1.01218	-9.1499	-3.19376	0.0807116	0.999998	63	SRY (sex determining region Y)-box 2	20674	20674	Sox2
ENSMUSG00000108126	0.949912	0.165157	0.487728	0.0874383	4.84851	2.27754	0.0464966	0.999998	64	predicted gene, 43909	NA		Gm43909
ENSMUSG00000043794	0.121337	0.621574	0.141835	0.211933	-4.5126	-2.17396	0.0308945	0.999998	65	RIKEN cDNA D830025C05 gene	NA		D830025C05Rik
ENSMUSG00000097626	0.229234	0.0303369	0.0766724	0.052545	4.6722	2.2241	0.040404	0.999998	66	RIKEN cDNA 4921504A21 gene	NA		4921504A21Rik
ENSMUSG00000038156	0.0126099	0.132108	0.0109352	0.163864	-5.57184	-2.47815	0.065124	0.999998	67	spondin 1, (f-spondin) extracellular matrix protein	233744	233744	Spon1
ENSMUSG00000110558	0.198685	0.75494	0.260443	0.112678	-4.42888	-2.14694	0.0273092	0.999998	68	predicted gene 45779	NA		Gm45779
ENSMUSG00000085663	0.108768	1.8311	0.188392	0.74643	-5.02819	-2.33004	0.0578501	0.999998	69	predicted gene 15718	NA		Gm15718
ENSMUSG00000113557	0.262127	1.13453	0.234015	0.173657	-4.70136	-2.23308	0.042899	0.999998	70		NA		AC153143.2
ENSMUSG00000073486	0.357079	0.0309813	0.0951567	0.0536612	4.50403	2.17122	0.033653	0.999998	71	predicted gene 10518	NA		Gm10518
ENSMUSG00000056673	2.50202	9.75775	4.32784	5.38194	-128.089	-7.001	0.0884526	0.999998	72	lysine (K)-specific demethylase 5D	20592	20592	Kdm5d
ENSMUSG00000072714	2.62386	0.497346	1.02954	0.473889	4.74494	2.24639	0.0536966	0.999998	73	ribosomal protein L21, pseudogene 4	NA		Rpl21-ps4
ENSMUSG00000052013	0.103501	0.283563	0.179268	0.143259	-5.74675	-2.52275	0.071629	0.999998	74	B and T lymphocyte associated	208154	208154	Btla
ENSMUSG00000002076	0.571103	0.130002	0.162439	0.0643789	4.15852	2.05607	0.0139936	0.999998	75	heat shock transcription factor 2 binding protein	74377	74377	Hsf2bp
ENSMUSG00000044574	0.0495587	0.260005	0.0608001	0.141701	-4.37487	-2.12924	0.0325785	0.999998	76	RIKEN cDNA 5031434C07 gene	NA		5031434C07Rik
ENSMUSG00000087968	0.495737	2.06459	0.858642	0.721749	-4.68162	-2.22701	0.0570972	0.999998	77	predicted gene, 25395	NA		Gm25395
ENSMUSG00000037922	0.121106	0.00873715	0.152695	0.0151332	5.07548	2.34354	0.0698947	0.999998	78	B cell scaffold protein with ankyrin repeats 1	242248	242248	Bank1
ENSMUSG00000064109	1.8478	0.415433	0.884117	0.362803	4.44454	2.15203	0.0413603	0.999998	79	hematopoietic cell signal transducer	23900	23900	Hcst
ENSMUSG00000053693	0.0104382	0.0666907	0.0180795	0.00732974	-4.45704	-2.15609	0.0426699	0.999998	80	microtubule associated serine/threonine kinase 1	56527	56527	Mast1
ENSMUSG00000032589	0	0.021969	0	0.00593163	-4.90882	-2.29538	0.0670856	0.999998	81	bassoon	12217	12217	Bsn
ENSMUSG00000076434	0.0635644	0.688867	0.0779827	0.814388	-5.50092	-2.45967	0.0752415	0.999998	82	WAP four-disulfide core domain 3	71856	71856	Wfdc3
ENSMUSG00000104571	0.0910581	0.519467	0.0357811	0.196045	-4.15349	-2.05432	0.0248508	0.999998	83	predicted gene 43010	NA		Gm43010
ENSMUSG00000068457	2.5681	12.4575	4.44807	8.80982	-181.734	-7.50569	0.0999983	0.999998	84	ubiquitously transcribed tetratricopeptide repeat gene, Y chromosome	22290	22290	Uty
ENSMUSG00000102533	0.0298994	0.213927	0.0292815	0.0787796	-4.20889	-2.07344	0.0346701	0.999998	85	predicted gene, 37226	NA		Gm37226
ENSMUSG00000109008	0.650059	2.68923	0.563816	0.801713	-4.27914	-2.09732	0.0408432	0.999998	86	predicted gene 44899	NA		Gm44899
ENSMUSG00000109721	0.0792558	0.243352	0.137275	0.088957	-4.82397	-2.27022	0.071847	0.999998	87	predicted gene 45280	NA		Gm45280
ENSMUSG00000021728	0.689657	0.189704	0.381169	0.241652	4.52969	2.17941	0.059058	0.999998	88	embigin	13723	13723	Emb
ENSMUSG00000104325	0.0361399	0.435838	0.0625961	0.302363	-4.60809	-2.20417	0.0604419	0.999998	89	predicted gene, 37321	NA		Gm37321
ENSMUSG00000103818	0.382938	1.40362	0.288899	0.353263	-4.12471	-2.04429	0.0296758	0.999998	90	predicted gene, 38009	NA		Gm38009
ENSMUSG00000066538	0.559142	0.129399	0.332964	0.224126	4.60451	2.20305	0.0628971	0.999998	91	predicted gene 6254	NA		Gm6254
ENSMUSG00000083773	119.436	42.8232	24.8519	37.5941	16.4226	4.03761	0.103433	0.999998	92	predicted gene 13394	NA		Gm13394
ENSMUSG00000009292	0.0101927	0.0477222	0.0176543	0.0188477	-4.68578	-2.22829	0.0705312	0.999998	93	transient receptor potential cation channel, subfamily M, member 2	28240	28240	Trpm2
ENSMUSG00000104292	0.133115	0.660898	0.0501658	0.233152	-3.93575	-1.97664	0.016929	0.999998	94	predicted gene, 38042	NA		Gm38042
ENSMUSG00000087790	1.13166	7.55913	1.10827	2.66776	-4.08865	-2.03163	0.0302383	0.999998	95	predicted gene, 25970	NA		Gm25970
ENSMUSG00000092021	0.0486314	0.888718	0.0421728	0.586691	-14.3577	-3.84376	0.105935	0.999998	96	guanylate binding protein 11	634650	634650	Gbp11
ENSMUSG00000024027	0.0912663	0.535238	0.0790393	0.116004	-4.1823	-2.0643	0.0420586	0.999998	97	glucagon-like peptide 1 receptor	14652	14652	Glp1r
ENSMUSG00000106603	0.312791	1.17209	0.414124	0.57178	-5.04292	-2.33426	0.0847556	0.999998	98	predicted gene 43509	NA		Gm43509
ENSMUSG00000091408	0.0596202	0.740658	0.103265	0.405162	-6.86817	-2.77993	0.100469	0.999998	99	predicted gene 6728	NA		Gm6728
ENSMUSG00000046971	0.010561	0.156139	0.0182922	0.0364541	-4.65158	-2.21772	0.0718657	0.999998	100	phospholipase A2, group IVF	271844	271844	Pla2g4f
ENSMUSG00000069049	12.5435	48.4163	21.7259	38.3996	-224.107	-7.80805	0.113844	0.999998	101	eukaryotic translation initiation factor 2, subunit 3, structural gene Y-linked	26908	26908	Eif2s3y
ENSMUSG00000106468	1.26456	6.6499	2.19028	0.759199	-4.1084	-2.03858	0.0414138	0.999998	102		NA		AC122844.1
ENSMUSG00000105761	0.292679	0.974078	0.425012	0.340391	-4.27313	-2.09529	0.0609307	0.999998	103	predicted gene 43787	NA		Gm43787
ENSMUSG00000090216	0.806076	0	0.807006	0	4.72821	2.2413	0.0846189	0.999998	104	predicted gene 16549	NA		Gm16549
ENSMUSG00000109642	0.14421	0.707046	0.138271	0.369159	-4.28973	-2.10089	0.064523	0.999998	105	predicted gene 45289	NA		Gm45289
ENSMUSG00000062713	0	0.123298	0	0.1391	-4.36981	-2.12757	0.0670434	0.999998	106	single-minded homolog 2 (Drosophila)	20465	20465	Sim2
ENSMUSG00000039543	0.121413	0.0151579	0.0668744	0.0262542	4.40261	2.13836	0.0711275	0.999998	107	cilia and flagella associated protein 70	76670	76670	Cfap70
ENSMUSG00000114136	0.598331	0.111835	0.272138	0.0976672	4.20733	2.0729	0.0596461	0.999998	108		NA		CT010452.1
ENSMUSG00000086390	0	0.190839	0	0.104869	-4.48354	-2.16464	0.074514	0.999998	109	RIKEN cDNA 1810019D21 gene	NA		1810019D21Rik
ENSMUSG00000097840	1.41525	0.40742	1.22242	0.572094	5.46573	2.45041	0.0972157	0.999998	110	predicted gene, 26756	NA		Gm26756
ENSMUSG00000112944	0.0249737	0.187153	0.0244576	0.0878116	-4.11389	-2.0405	0.0513448	0.999998	111		NA		AL645643.1
ENSMUSG00000032496	0.250702	0.0201038	0.245707	0.0348207	5.4244	2.43946	0.0976195	0.999998	112	lactotransferrin	17002	17002	Ltf
ENSMUSG00000040132	0.0659526	0.369414	0.0571935	0.231846	-4.49779	-2.16921	0.0775634	0.999998	113	seminal vesicle secretory protein 2	53878	53878	Svs2
ENSMUSG00000100394	0.242383	1.15647	0.144884	0.425176	-3.83741	-1.94013	0.0285133	0.999998	114	predicted gene 28791	NA		Gm28791
ENSMUSG00000082057	0.435284	0.153108	0.131346	0.265191	4.44364	2.15174	0.077521	0.999998	115	predicted gene 15789	NA		Gm15789
ENSMUSG00000107604	0.256265	2.08875	0.443863	1.20802	-4.65397	-2.21846	0.0868251	0.999998	116	predicted gene, 44041	NA		Gm44041
ENSMUSG00000011463	0.191627	0.0321903	0.0483926	0.0301429	4.05975	2.02139	0.0538509	0.999998	117	carboxypeptidase B1 (tissue)	76703	76703	Cpb1
ENSMUSG00000024905	0.126456	0.0206067	0.0671284	0.0356919	3.94515	1.98008	0.0458223	0.999998	118	metallothionein-like 5, testis-specific (tesmin)	17771	17771	Mtl5
ENSMUSG00000109873	0.0183407	0.195343	0.031767	0.154168	-4.69472	-2.23104	0.0922733	0.999998	119	predicted gene 45407	NA		Gm45407
ENSMUSG00000030825	0.115732	0.499206	0.200454	0.0812571	-4.53308	-2.18049	0.0866365	0.999998	120	hydroxysteroid (17-beta) dehydrogenase 14	66065	66065	Hsd17b14
ENSMUSG00000103916	0.109876	0.40115	0.120967	0.186723	-4.25031	-2.08757	0.0731835	0.999998	121	predicted gene, 38071	NA		Gm38071
ENSMUSG00000000142	0.238049	0.918155	0.320989	0.691234	-4.17927	-2.06325	0.0691936	0.999998	122	axin 2	12006	12006	Axin2
ENSMUSG00000097089	1.2176	0.273036	0.356009	0.0841784	3.9619	1.98619	0.0520431	0.999998	123	predicted gene, 26879	NA		Gm26879
ENSMUSG00000108460	0.00866912	0.193541	0.0150154	0.167999	-4.64367	-2.21526	0.0913126	0.999998	124	predicted gene 44557	NA		Gm44557
ENSMUSG00000104632	0.31665	0.784814	0.503559	0.373439	-4.47033	-2.16038	0.0857448	0.999998	125	predicted gene 42909	NA		Gm42909
ENSMUSG00000001014	0.711399	0.0726247	0.472611	0.12579	4.40421	2.13888	0.0852249	0.999998	126	intercellular adhesion molecule 4, Landsteiner-Wiener blood group	78369	78369	Icam4
ENSMUSG00000046991	0.334589	0.0410695	0.198998	0.0384574	4.6613	2.22073	0.0966834	0.999998	127	WD repeat domain 27	71682	71682	Wdr27
ENSMUSG00000108693	0.459727	1.81661	0.311358	0.849855	-3.81267	-1.9308	0.0408851	0.999998	128	predicted gene 45153	NA		Gm45153
ENSMUSG00000069045	14.1614	70.2532	24.5114	47.784	-239.419	-7.90339	0.131218	0.999998	129	DEAD (Asp-Glu-Ala-Asp) box polypeptide 3, Y-linked	26900	26900	Ddx3y
ENSMUSG00000103937	0.18764	0.789965	0.206128	0.235031	-4.00414	-2.00149	0.0619724	0.999998	130	predicted gene, 37186	NA		Gm37186
ENSMUSG00000086090	4.10302	1.07315	1.34064	0.813205	3.88951	1.95959	0.053534	0.999998	131	predicted gene 12531	NA		Gm12531
ENSMUSG00000088955	9.91754	0.629792	12.0245	1.09083	4.91797	2.29806	0.105958	0.999998	132	predicted gene, 24944	NA		Gm24944
ENSMUSG00000090322	1.54441	0.306064	0.623824	0.267289	4.10148	2.03614	0.0718363	0.999998	133	predicted gene 17090	NA		Gm17090
ENSMUSG00000030491	0.0848174	0.475916	0.111071	0.39088	-4.23784	-2.08333	0.0842813	0.999998	134	tudor domain containing 12	71981	71981	Tdrd12
ENSMUSG00000113041	0	0.235987	0	0.149086	-4.96656	-2.31225	0.108254	0.999998	135		NA		CT025556.1
ENSMUSG00000065118	0.799061	4.73917	1.38401	1.4518	-3.86838	-1.95173	0.0562393	0.999998	136	predicted gene, 23297	NA		Gm23297
ENSMUSG00000089308	3.75855	14.2733	6.50999	3.40003	-4.5294	-2.17932	0.0961216	0.999998	137	predicted gene, 24837	NA		Gm24837
ENSMUSG00000043366	0.152589	0.0223379	0.105465	0.0193701	4.46466	2.15855	0.0947127	0.999998	138	olfactory receptor 78	170639	170639	Olfr78
ENSMUSG00000074824	0.0773338	0.291094	0.0476263	0.0477594	-3.55036	-1.82797	0.01753	0.999998	139	regulator of sex-limitation candidate 18	432770	432770	Rslcan18
ENSMUSG00000041782	0.491972	0.096763	0.296953	0.0921994	4.41858	2.14358	0.0938019	0.999998	140	ladinin	16763	16763	Lad1
ENSMUSG00000030730	0.0291191	0.170257	0.0290856	0.0935587	-3.84768	-1.94399	0.0579986	0.999998	141	ATPase, Ca++ transporting, cardiac muscle, fast twitch 1	11937	11937	Atp2a1
ENSMUSG00000107534	0.156679	0.513799	0.271375	0.194832	-4.25372	-2.08872	0.0888168	0.999998	142	predicted gene, 43920	NA		Gm43920
ENSMUSG00000114150	1.83733	0.300275	1.56386	0.259778	4.4769	2.1625	0.0972576	0.999998	143		NA		AC132954.5
ENSMUSG00000102930	0.0980335	0.435884	0.105858	0.113055	-3.91495	-1.969	0.0685593	0.999998	144	predicted gene, 38115	NA		Gm38115
ENSMUSG00000099634	2.27528	0.467932	0.961411	0.405763	4.58119	2.19572	0.102484	0.999998	145	predicted gene 29462	NA		Gm29462
ENSMUSG00000045709	1.23899	0.585616	0.111085	0.658239	4.17362	2.0613	0.0865795	0.999998	146	smal lysine rich protein 1, pseudogene	NA		Smkr-ps
ENSMUSG00000108049	0.433993	0.14076	0.366645	0.214894	4.48538	2.16523	0.100777	0.999998	147	predicted gene, 44168	NA		Gm44168
ENSMUSG00000088171	0.356073	4.84007	0.616736	1.50694	-4.22959	-2.08052	0.0930057	0.999998	148	predicted gene, 25220	NA		Gm25220
ENSMUSG00000031302	0.00729736	0.0595055	0.0126394	0.0275644	-4.17359	-2.06129	0.0881127	0.999998	149	neuroligin 3	245537	245537	Nlgn3
ENSMUSG00000036528	0.0453232	0.235179	0.0703387	0.257446	-5.80223	-2.53661	0.125558	0.999998	150	PTPRF interacting protein, binding protein 2 (liprin beta 2)	19024	19024	Ppfibp2
ENSMUSG00000093798	0.713736	0.182428	0.267041	0.121096	3.58265	1.84103	0.0393514	0.999998	151	predicted pseudogene 8355	NA		Gm8355
ENSMUSG00000105558	0.22373	9.89793	0.219107	8.48434	-16.1517	-4.01361	0.142919	0.999998	152	predicted gene 5855	NA		Gm5855
ENSMUSG00000106427	0.259619	1.0325	0.265216	0.617844	-4.32359	-2.11223	0.0993586	0.999998	153	predicted gene 42820	NA		Gm42820
ENSMUSG00000034706	0.0426105	0.210009	0.04173	0.107607	-3.88292	-1.95714	0.0729504	0.999998	154	dynein, axonemal, intermediate chain 2	432611	432611	Dnaic2
ENSMUSG00000030699	1.77086	0.408669	1.39191	0.345394	4.07548	2.02697	0.086764	0.999998	155	T-box 6	21389	21389	Tbx6
ENSMUSG00000112592	1.28465	3.69294	1.03846	1.05221	-3.7169	-1.8941	0.0628268	0.999998	156		NA		AC153517.1
ENSMUSG00000022061	0.189273	0.933841	0.277801	0.640985	-5.56188	-2.47557	0.130667	0.999998	157	NK-3 transcription factor, locus 1 (Drosophila)	18095	18095	Nkx3-1
ENSMUSG00000085572	1.52985	0.349369	0.496826	0.142417	3.82836	1.93673	0.0752254	0.999998	158	predicted gene 16234	NA		Gm16234
ENSMUSG00000082587	0.088475	0.493042	0.153243	0.0637067	-3.66293	-1.873	0.0601552	0.999998	159	predicted gene 12129	NA		Gm12129
ENSMUSG00000104925	0.118901	0.473753	0.138987	0.0475619	-3.58529	-1.84209	0.051818	0.999998	160	predicted gene 43061	NA		Gm43061
ENSMUSG00000044162	0.0711021	0	0.0742989	0	6.4151	2.68147	0.138877	0.999998	161	TNFAIP3 interacting protein 3	414084	414084	Tnip3
ENSMUSG00000024502	0.189923	0.0344404	0.134907	0.0596525	3.84452	1.9428	0.0775357	0.999998	162	janus kinase and microtubule interacting protein 2	76217	76217	Jakmip2
ENSMUSG00000097767	0.0727003	0.227705	0.0666904	0.0434383	-3.82772	-1.93649	0.0764918	0.999998	163	myocardial infarction associated transcript (non-protein coding)	NA		Miat
ENSMUSG00000055561	0.0766988	0	0.0805425	0	3.88499	1.95791	0.0840653	0.999998	164	serine peptidase inhibitor, Kazal type 5	72432	72432	Spink5
ENSMUSG00000080845	0.119301	0.517578	0.146362	0.258962	-3.75377	-1.90834	0.0736525	0.999998	165	predicted gene 9115	NA		Gm9115
ENSMUSG00000103380	1.53831	0.508456	0.402516	0.45662	3.78795	1.92142	0.0754567	0.999998	166	predicted gene, 37756	NA		Gm37756
ENSMUSG00000038057	1.46327	0.457103	1.00391	0.513789	4.055	2.0197	0.095365	0.999998	167	diazepam binding inhibitor-like 5	13168	13168	Dbil5
ENSMUSG00000003271	0.18308	0.657817	0.11448	0.0234139	-3.39079	-1.76162	0.031452	0.999998	168	sulfotransferase family, cytosolic, 2B, member 1	54200	54200	Sult2b1
ENSMUSG00000082901	3.51259	1.07902	1.1638	0.811028	3.51688	1.81429	0.0467131	0.999998	169	predicted gene 14323	NA		Gm14323
ENSMUSG00000104293	0.377986	1.4091	0.242612	0.560153	-3.50045	-1.80754	0.0461393	0.999998	170	predicted gene, 38043	NA		Gm38043
ENSMUSG00000078370	0.165818	0.780495	0.287206	0.188165	-4.1757	-2.06202	0.102298	0.999998	171	predicted pseudogene 6316	NA		Gm6316
ENSMUSG00000106193	15.0453	3.4101	9.5768	3.19321	3.64936	1.86764	0.066967	0.999998	172	microRNA 7090	NA		Mir7090
ENSMUSG00000101711	1.09554	0.131112	1.23415	0.227092	4.03287	2.01181	0.0950405	0.999998	173	predicted gene 28306	NA		Gm28306
ENSMUSG00000052572	0.0904849	0.0264998	0.0177603	0.00715495	3.3069	1.72548	0.0222276	0.999998	174	discs, large homolog 2 (Drosophila)	23859	23859	Dlg2
ENSMUSG00000055301	0.19175	0.0366295	0.133681	0.0634442	4.54673	2.18483	0.122587	0.999998	175	alcohol dehydrogenase 7 (class IV), mu or sigma polypeptide	11529	11529	Adh7
ENSMUSG00000110084	0	0.165227	0	0.217688	-4.97673	-2.3152	0.133982	0.999998	176	predicted gene 45257	NA		Gm45257
ENSMUSG00000102672	0.599838	1.55962	0.72919	0.146566	-4.2251	-2.07899	0.110729	0.999998	177	predicted gene, 37105	NA		Gm37105
ENSMUSG00000085538	0.501643	2.48758	0.404927	1.50269	-3.58416	-1.84163	0.0653197	0.999998	178	predicted gene 11455	NA		Gm11455
ENSMUSG00000086007	2.26204	0	3.32457	0	7.06786	2.82127	0.149982	0.999998	179	RIKEN cDNA 1700057H21 gene	NA		1700057H21Rik
ENSMUSG00000030317	0.034356	0.1344	0.0343165	0.0291288	-3.60677	-1.85071	0.0713284	0.999998	180	tissue inhibitor of metalloproteinase 4	110595	110595	Timp4
ENSMUSG00000090861	1.98669	0.652475	0.898774	0.578538	3.67439	1.8775	0.0753807	0.999998	181	ADP-ribosylation factor 4, opposite strand	NA		Arf4os
ENSMUSG00000109364	1.36216	6.25659	2.35933	4.00053	-4.20306	-2.07144	0.113778	0.999998	182	predicted gene 44948	NA		Gm44948
ENSMUSG00000085166	0.635185	0.134666	0.234082	0.126101	3.50913	1.81111	0.0605236	0.999998	183	predicted gene 15522	NA		Gm15522
ENSMUSG00000001508	0.304489	0.0632073	0.0627127	0.0602263	3.70788	1.8906	0.0837856	0.999998	184	sarcoglycan, alpha (dystrophin-associated glycoprotein)	20391	20391	Sgca
ENSMUSG00000093189	0.345115	1.81336	0.337984	0.659005	-3.42133	-1.77456	0.0501956	0.999998	185	predicted gene, 25694	NA		Gm25694
ENSMUSG00000106092	0.0784856	0.461403	0.0680729	0.210621	-3.84791	-1.94407	0.093197	0.999998	186	predicted gene 43072	NA		Gm43072
ENSMUSG00000085766	0.20389	0.0812154	0.136792	0.140669	4.12431	2.04415	0.109308	0.999998	187	RIKEN cDNA 2810430I11 gene	NA		2810430I11Rik
ENSMUSG00000103493	0.25169	0.860094	0.244895	0.380715	-3.70249	-1.88849	0.0836313	0.999998	188	predicted gene, 37411	NA		Gm37411
ENSMUSG00000093593	0.036373	0.217142	0.063	0.00638505	-3.96068	-1.98575	0.101787	0.999998	189	predicted gene 20683	NA		Gm20683
ENSMUSG00000084304	2.22441	0.53868	0.875604	0.145444	3.36425	1.75028	0.0422538	0.999998	190	predicted pseudogene 6142	NA		Gm6142
ENSMUSG00000093651	0.186495	1.26679	0.190515	1.29575	-3.72943	-1.89895	0.0877594	0.999998	191	predicted gene 5873	NA		Gm5873
ENSMUSG00000027985	0.201021	0.0507468	0.0951242	0.030258	3.42025	1.7741	0.0572619	0.999998	192	lymphoid enhancer binding factor 1	16842	16842	Lef1
ENSMUSG00000082193	1.00584	0.253505	0.506438	0.272115	3.50419	1.80908	0.065368	0.999998	193	ribosomal protein L5, pseudogene 1	NA		Rpl5-ps1
ENSMUSG00000083064	3.51208	1.13175	1.56563	0.773015	3.31188	1.72765	0.0391791	0.999998	194	predicted gene 7785	NA		Gm7785
ENSMUSG00000047880	0.0292084	0.175474	0.0286049	0.102229	-3.48349	-1.80053	0.0634555	0.999998	195	chemokine (C-X-C motif) receptor 5	12145	12145	Cxcr5
ENSMUSG00000031220	0.0775994	0.392779	0.07235	0.143807	-3.42302	-1.77527	0.0588303	0.999998	196	acyl-CoA wax alcohol acyltransferase 2	245532	245532	Awat2
ENSMUSG00000077345	1.16376	7.04747	1.16242	4.04755	-3.77894	-1.91798	0.0924272	0.999998	197	small nucleolar RNA, C/D box 70	NA		Snord70
ENSMUSG00000104026	0.120351	0.40472	0.125385	0.0764278	-3.6214	-1.85655	0.080715	0.999998	198	predicted gene, 37212	NA		Gm37212
ENSMUSG00000026656	0.258627	0.00696143	0.299474	0.0120576	5.78522	2.53237	0.148941	0.999998	199	Fc receptor, IgG, low affinity IIb	14130	14130	Fcgr2b
ENSMUSG00000021390	0.245155	0.0411976	0.139102	0.0385773	3.57631	1.83847	0.0749421	0.999998	200	osteoglycin	18295	18295	Ogn
ENSMUSG00000017002	1.30133	4.16	1.00574	1.22234	-3.7066	-1.8901	0.0905874	0.999998	201	secretory leukocyte peptidase inhibitor	20568	20568	Slpi
ENSMUSG00000079138	0.443482	0.0384973	0.297536	0.0666793	3.81888	1.93315	0.0968308	0.999998	202	predicted pseudogene 8818	NA		Gm8818
ENSMUSG00000081614	0.268798	0.065186	0.099059	0.112906	3.60002	1.848	0.0861472	0.999998	203	predicted gene 9436	NA		Gm9436
ENSMUSG00000112616	0.0134287	0.251798	0.0232592	0.235783	-4.0145	-2.00522	0.114989	0.999998	204		NA		AC160028.4
ENSMUSG00000021613	3.3591	15.3319	3.12369	15.2942	-4.17256	-2.06093	0.122628	0.999998	205	hyaluronan and proteoglycan link protein 1	12950	12950	Hapln1
ENSMUSG00000045201	2.54528	0.111238	3.81012	0.113453	8.70539	3.12191	0.166995	0.999998	206	leucine rich repeat containing 3B	218763	218763	Lrrc3b
ENSMUSG00000099032	0.550472	0.132045	0.447518	0.141132	4.66538	2.22199	0.144109	0.999998	207	transcription factor 24	100039596	100039596	Tcf24
ENSMUSG00000034968	0.967962	0.309087	0.617263	0.336977	3.59852	1.8474	0.0903359	0.999998	208	ladybird homeobox homolog 2 (Drosophila)	16815	16815	Lbx2
ENSMUSG00000050666	0.162156	0.255485	0.280862	0.0689809	-4.04247	-2.01524	0.119324	0.999998	209	V-set and transmembrane domain containing 4	320736	320736	Vstm4
ENSMUSG00000081965	0.288716	0.0655394	0.23143	0.113518	3.5634	1.83326	0.0861263	0.999998	210	predicted gene 11620	NA		Gm11620
ENSMUSG00000054252	0.39131	2.58178	0.354761	3.5857	-5.40632	-2.43465	0.155939	0.999998	211	fibroblast growth factor receptor 3	14184	14184	Fgfr3
ENSMUSG00000092051	0.587122	2.01063	0.57669	1.64663	-4.279	-2.09727	0.133528	0.999998	212	predicted gene 17229	NA		Gm17229
ENSMUSG00000105848	0.0289606	0.241481	0.0501612	0.255485	-4.04765	-2.01708	0.120818	0.999998	213	predicted gene 42683	NA		Gm42683
ENSMUSG00000090120	1.22059	0.325554	1.08611	0.332036	4.21056	2.07401	0.130683	0.999998	214	RIKEN cDNA A730090N16 gene	NA		A730090N16Rik
ENSMUSG00000029359	0.327115	3.9283	0.303166	5.89023	-4.86957	-2.2838	0.150954	0.999998	215	tescalcin	57816	57816	Tesc
ENSMUSG00000043448	0.244389	0.860299	0.22939	0.377225	-3.35793	-1.74757	0.0667334	0.999998	216	gap junction protein, gamma 2	118454	118454	Gjc2
ENSMUSG00000025481	0	0.27457	0	0.35682	-4.05325	-2.01908	0.121946	0.999998	217	urate (5-hydroxyiso-) hydrolase	76974	76974	Urah
ENSMUSG00000086108	0.0382418	0.207231	0.0662367	0.0852597	-3.80192	-1.92673	0.108318	0.999998	218	predicted gene 5602	NA		Gm5602
ENSMUSG00000108053	0.504598	1.21482	0.69053	0.647951	-3.73036	-1.89931	0.105974	0.999998	219	predicted gene, 43890	NA		Gm43890
ENSMUSG00000091383	3.98476	0.118899	3.45854	0.205939	5.99265	2.58319	0.16218	0.999998	220	histone cluster 1, H2al	NA		Hist1h2al
ENSMUSG00000113922	0.0435633	0.72831	0.0754539	1.01064	-4.15653	-2.05538	0.131378	0.999998	221		NA		AC131743.5
ENSMUSG00000021194	0.213132	0.0503324	0.136107	0.0871782	4.04796	2.01719	0.125896	0.999998	222	chromogranin A	12652	12652	Chga
ENSMUSG00000069041	0.29399	0.0804132	0.0907887	0.0944441	3.57255	1.83695	0.0959808	0.999998	223	solute carrier family 25 (mitochondrial carrier; adenine nucleotide translocator), member 31	73333	73333	Slc25a31
ENSMUSG00000048485	0.00521296	0.0861426	0.00902912	0.0839493	-3.82114	-1.934	0.115408	0.999998	224	zinc finger and BTB domain containing 8b	215627	215627	Zbtb8b
ENSMUSG00000048148	0.0303965	0.136867	0.026463	0.089929	-3.69801	-1.88675	0.107065	0.999998	225	NACHT and WD repeat domain containing 1	319555	319555	Nwd1
ENSMUSG00000105427	0	2.82605	0	4.6661	-4.72673	-2.24084	0.157803	0.999998	226	predicted gene, 31678	NA		Gm31678
ENSMUSG00000084094	0.0981247	0.0137063	0.0985624	0.0237399	3.58623	1.84247	0.104733	0.999998	227	predicted gene 13961	NA		Gm13961
ENSMUSG00000107151	1.36844	2.31236	2.37021	0.450453	-3.71609	-1.89378	0.11723	0.999998	228	predicted gene 43810	NA		Gm43810
ENSMUSG00000103132	0.0580222	0.326798	0.100497	0.21154	-4.27709	-2.09663	0.147276	0.999998	229	predicted gene, 37978	NA		Gm37978
ENSMUSG00000102147	0.0608212	0.176116	0.105345	0.0120655	-3.53522	-1.8218	0.101297	0.999998	230	predicted gene, 38055	NA		Gm38055
ENSMUSG00000021730	0.0196172	0.135692	0.021166	0.133782	-4.78534	-2.25862	0.162478	0.999998	231	hyperpolarization-activated, cyclic nucleotide-gated K+ 1	15165	15165	Hcn1
ENSMUSG00000080768	0.83731	2.15038	1.25711	1.39196	-3.60299	-1.84919	0.111586	0.999998	232	predicted gene 12219	NA		Gm12219
ENSMUSG00000103959	0.265312	0.655359	0.247123	0.307545	-3.69517	-1.88564	0.116809	0.999998	233	predicted gene, 37720	NA		Gm37720
ENSMUSG00000035032	0.141168	0.0248971	0.0840644	0.0233136	3.57158	1.83656	0.107944	0.999998	234	NIMA (never in mitosis gene a)-related expressed kinase 11	208583	208583	Nek11
ENSMUSG00000103783	0.172649	0.460214	0.161598	0.140463	-3.28981	-1.718	0.0840574	0.999998	235	predicted gene, 37522	NA		Gm37522
ENSMUSG00000098165	1.78075	0.746302	0.881364	0.953947	3.67628	1.87824	0.118345	0.999998	236	predicted gene, 26977	NA		Gm26977
ENSMUSG00000042672	0.417996	0.127694	0.281056	0.110805	3.82241	1.93448	0.126957	0.999998	237	DC-STAMP domain containing 1	77772	77772	Dcst1
ENSMUSG00000046623	0.0906981	0.519949	0.0786652	0.0793447	-3.90586	-1.96564	0.133452	0.999998	238	gap junction protein, beta 4	14621	14621	Gjb4
ENSMUSG00000007122	2.18781	0.684026	1.27383	0.505535	3.46548	1.79306	0.102114	0.999998	239	calsequestrin 1	12372	12372	Casq1
ENSMUSG00000038298	0.227778	0.0195045	0.227516	0.0337828	4.77748	2.25625	0.167275	0.999998	240	PDZ domain containing 1	59020	59020	Pdzk1
ENSMUSG00000098559	1.14986	0.338192	0.347348	0.383466	3.41818	1.77323	0.0991882	0.999998	241	predicted gene 15013	NA		Gm15013
ENSMUSG00000091269	0.0974364	0.567386	0.0845096	0.39448	-3.34205	-1.74073	0.0924975	0.999998	242	predicted gene 6682	NA		Gm6682
ENSMUSG00000086228	0.200301	0.818399	0.216287	0.509856	-3.9376	-1.97732	0.13865	0.999998	243	ubiquitin-associated protein 1-like	208080	208080	Ubap1l
ENSMUSG00000109879	0.202339	0.660223	0.293825	0.346268	-4.20884	-2.07342	0.15532	0.999998	244	predicted gene 10997	NA		Gm10997
ENSMUSG00000094686	0.958343	11.2488	1.27732	17.0331	-5.80763	-2.53795	0.183958	0.999998	245	chemokine (C-C motif) ligand 21A (serine)	18829	18829/100504362	Ccl21a
ENSMUSG00000027220	3.8459	10.3265	4.52178	7.88254	-4.8225	-2.26978	0.17385	0.999998	246	synaptotagmin XIII	80976	80976	Syt13
ENSMUSG00000024036	0.138466	0.397749	0.122633	0.071175	-3.10851	-1.63622	0.0625187	0.999998	247	solute carrier family 37 (glycerol-3-phosphate transporter), member 1	224674	224674	Slc37a1
ENSMUSG00000108780	0.245775	0.677934	0.238243	0.224397	-3.20216	-1.67905	0.0786479	0.999998	248	RIKEN cDNA 5430434F05 gene	NA		5430434F05Rik
ENSMUSG00000105322	0.119734	0.618921	0.0966498	0.522329	-3.2854	-1.71607	0.0924217	0.999998	249	predicted gene 43751	NA		Gm43751
ENSMUSG00000105893	0.275667	0.377414	0.477469	0.0414803	-4.17917	-2.06321	0.155607	0.999998	250	Wdr46 retrotransposed pseudogene	NA		Wdr46-ps
ENSMUSG00000081809	0.411007	1.78009	0.452851	0.335403	-3.71921	-1.895	0.132067	0.999998	251	predicted gene 15539	NA		Gm15539
ENSMUSG00000036655	0.388363	0.117383	0.0445367	0.112297	3.13764	1.64968	0.0724642	0.999998	252	collectin sub-family member 11	71693	71693	Colec11
ENSMUSG00000018479	0.891668	0.369184	0.337125	0.537644	3.44841	1.78593	0.113852	0.999998	253	RIKEN cDNA 1700125H20 gene	73634	73634	1700125H20Rik
ENSMUSG00000049493	0.0780227	1.93309	0.1133	3.17482	-6.53329	-2.70781	0.191178	0.999998	254	plastin 1 (I-isoform)	102502	102502	Pls1
ENSMUSG00000107455	0.469985	0.192831	0.288848	0.241784	3.37193	1.75358	0.105531	0.999998	255	predicted gene, 43868	NA		Gm43868
ENSMUSG00000108678	0.0326017	0.270589	0.0564678	0.234362	-3.91038	-1.96731	0.146029	0.999998	256	predicted gene 44758	NA		Gm44758
ENSMUSG00000020950	0.241773	0.462822	0.418763	0.503235	-5.41252	-2.4363	0.185755	0.999998	257	forkhead box G1	15228	15228	Foxg1
ENSMUSG00000063239	0.0310222	0.267602	0.0289237	0.315242	-3.82605	-1.93585	0.141543	0.999998	258	glutamate receptor, metabotropic 4	268934	268934	Grm4
ENSMUSG00000079484	1.14383	0.394081	0.684628	0.274999	3.12324	1.64304	0.0738915	0.999998	259	phytanoyl-CoA dioxygenase domain containing 1	227696	227696	Phyhd1
ENSMUSG00000102959	0.0889597	0.483005	0.154083	0.307509	-3.70427	-1.88919	0.134857	0.999998	260	predicted gene, 37015	NA		Gm37015
ENSMUSG00000030693	0.671161	2.16433	0.20392	0.431891	-2.84913	-1.51052	0.0249285	0.999998	261	kallikrein related-peptidase 10	69540	69540	Klk10
ENSMUSG00000097014	0.61716	0.175352	0.299796	0.303719	3.52901	1.81926	0.122505	0.999998	262	predicted gene, 26706	NA		Gm26706
ENSMUSG00000038630	0.398042	0.988898	0.631307	0.660214	-4.07794	-2.02784	0.156881	0.999998	263	zinc finger with KRAB and SCAN domains 16	100041581	100041581	Zkscan16
ENSMUSG00000086586	4.78609	1.23395	1.3176	1.20253	3.35417	1.74595	0.110077	0.999998	264	predicted gene 11192	NA		Gm11192
ENSMUSG00000101695	0.906698	0.358459	0.466417	0.620869	3.94085	1.97851	0.152762	0.999998	265	RIKEN cDNA 1700094J05 gene	NA		1700094J05Rik
ENSMUSG00000110167	0.342673	0.954889	0.293255	0.292428	-3.20713	-1.68128	0.094191	0.999998	266	predicted gene 45532	NA		Gm45532
ENSMUSG00000024600	0.039164	0.212944	0.0383547	0.10581	-3.22175	-1.68784	0.0966292	0.999998	267	solute carrier family 27 (fatty acid transporter), member 6	225579	225579	Slc27a6
ENSMUSG00000104687	0.0602992	0.308884	0.0739769	0.195505	-3.45674	-1.78941	0.121983	0.999998	268	predicted gene 42899	NA		Gm42899
ENSMUSG00000056457	0.0466879	0.257457	0.0808658	0.0695135	-3.55652	-1.83047	0.129288	0.999998	269	prolactin family 2, subfamily c, member 3	18812	18812/26421	Prl2c3
ENSMUSG00000023931	0.478882	0.132095	0.393638	0.165754	3.49525	1.8054	0.125118	0.999998	270	EF hand domain family, member B	211482	211482	Efhb
ENSMUSG00000107944	0.104723	0.36527	0.0945149	0.161088	-3.32223	-1.73215	0.110532	0.999998	271	predicted gene, 44280	NA		Gm44280
ENSMUSG00000029334	0.290411	0.510389	0.269405	0.266355	-4.73798	-2.24427	0.185172	0.999998	272	protein kinase, cGMP-dependent, type II	19092	19092	Prkg2
ENSMUSG00000042894	0.387993	0.0740192	0.406096	0.0683178	3.81377	1.93122	0.146971	0.999998	273	olfactory receptor 1260	258983	258983	Olfr1260
ENSMUSG00000103672	0.15734	0.506689	0.0944809	0.0533047	-2.93914	-1.55539	0.0575441	0.999998	274	predicted gene, 37621	NA		Gm37621
ENSMUSG00000093394	0.348398	0.485314	0.603443	0.194033	-4.00076	-2.00028	0.158314	0.999998	275	predicted gene 20621	NA		Gm20621
ENSMUSG00000081378	0.435972	1.78355	0.445371	0.836981	-3.12808	-1.64528	0.0872632	0.999998	276	ribosomal protein S13, pseudogene 4	NA		Rps13-ps4
ENSMUSG00000024810	0.656605	1.9442	0.469019	0.693649	-3.06715	-1.6169	0.0794382	0.999998	277	interleukin 33	77125	77125	Il33
ENSMUSG00000105358	0.0508409	0.174711	0.0594296	0.0319238	-3.06911	-1.61782	0.0816368	0.999998	278	predicted gene 43099	NA		Gm43099
ENSMUSG00000083650	1.12568	3.44003	1.3164	1.40792	-3.12413	-1.64346	0.0880744	0.999998	279	predicted gene 13357	NA		Gm13357
ENSMUSG00000098246	0.397537	0.208282	0.0140318	0.360755	3.37123	1.75328	0.120307	0.999998	280	predicted gene 7627	NA		Gm7627
ENSMUSG00000097614	0.323419	0.0697315	0.15865	0.0652964	3.08027	1.62306	0.084178	0.999998	281	predicted gene, 26508	NA		Gm26508
ENSMUSG00000112742	0.0815107	0.843716	0.141181	0.227803	-3.35365	-1.74573	0.118195	0.999998	282		NA		AC226737.1
ENSMUSG00000078503	0.047163	0.197367	0.0439726	0.0737943	-3.0639	-1.61537	0.0815378	0.999998	283	zinc finger protein 990	101056073	101056073	Zfp990
ENSMUSG00000101567	0.520447	2.06547	0.638499	1.27454	-3.20405	-1.6799	0.100598	0.999998	284	thioredoxin, pseudogene 1	NA		Txn-ps1
ENSMUSG00000003273	1.0479	2.44164	0.958127	1.06178	-3.71958	-1.89514	0.148077	0.999998	285	carbonic anhydrase 11	12348	12348	Car11
ENSMUSG00000049436	2.64938	0.33723	2.97252	0.398143	6.30488	2.65647	0.202276	0.999998	286	uroplakin 1B	22268	22268	Upk1b
ENSMUSG00000010342	0.0463495	0.182621	0.0124991	0.0333691	-2.86747	-1.51978	0.0495894	0.999998	287	testis expressed gene 14	83560	83560	Tex14
ENSMUSG00000113448	0.429626	1.85297	0.400563	0.211548	-3.22916	-1.69116	0.106618	0.999998	288		NA		CT030166.4
ENSMUSG00000082218	1.13972	0.363129	0.102184	0.434223	3.26667	1.70782	0.114201	0.999998	289	predicted gene 13602	NA		Gm13602
ENSMUSG00000112411	0.40472	1.17372	0.452851	0.794352	-3.61564	-1.85425	0.145342	0.999998	290		NA		AC155909.1
ENSMUSG00000052142	0.137018	0.0566535	0.105035	0.0981267	4.10702	2.03809	0.168076	0.999998	291	RAS protein activator like 3	320484	320484	Rasal3
ENSMUSG00000082465	1.54931	0.617545	0.417804	0.548147	3.24211	1.69693	0.113014	0.999998	292	ribosomal protein S6, pseudogene 3	NA		Rps6-ps3
ENSMUSG00000102460	0.73974	0.22077	0.598623	0.305819	3.70104	1.88793	0.148853	0.999998	293	predicted gene, 38197	NA		Gm38197
ENSMUSG00000112820	0.284605	0.112285	0.0548255	0.194484	4.65729	2.21949	0.18912	0.999998	294		NA		AC125108.1
ENSMUSG00000020875	0.247806	0.0582639	0.180141	0.0508826	3.27896	1.71324	0.1176	0.999998	295	homeobox B9	15417	15417	Hoxb9
ENSMUSG00000025588	0.3927	0.272148	0.20859	0.471375	3.70021	1.88761	0.149055	0.999998	296	N-acetyl transferase 1	17960	17960	Nat1
ENSMUSG00000041323	0.0461894	0.140323	0.0452858	0.0506188	-3.4641	-1.79248	0.134304	0.999998	297	adenylate kinase 7	78801	78801	Ak7
ENSMUSG00000093264	7.64299	21.0553	7.86107	10.0523	-3.34383	-1.7415	0.122927	0.999998	298	predicted gene, 23419	NA		Gm23419
ENSMUSG00000092103	0.102539	0.022376	0.0561453	0.0213207	3.34688	1.74282	0.123529	0.999998	299	predicted gene 17039	NA		Gm17039
ENSMUSG00000034435	0.252856	0.088792	0.0759464	0.0998032	3.88138	1.95657	0.160797	0.999998	300	transmembrane protein 30B	238257	238257	Tmem30b
ENSMUSG00000102415	0.183418	0.440812	0.168846	0.148722	-3.15523	-1.65774	0.101926	0.999998	301	RIKEN cDNA A430110C17 gene	NA		A430110C17Rik
ENSMUSG00000020734	2.48284	8.63273	2.96534	10.0346	-4.51905	-2.17602	0.188426	0.999998	302	glutamate receptor, ionotropic, NMDA2C (epsilon 3)	14813	14813	Grin2c
ENSMUSG00000084306	0.306347	0.621831	0.357712	0.34889	-3.86275	-1.94963	0.161187	0.999998	303	predicted gene 11743	NA		Gm11743
ENSMUSG00000027420	0.192832	0.672821	0.0940339	0.206029	-2.86077	-1.5164	0.0600913	0.999998	304	beaded filament structural protein 1, in lens-CP94	12075	12075	Bfsp1
ENSMUSG00000085033	1.23561	0.698821	0.705853	1.21039	3.51511	1.81357	0.140012	0.999998	305	predicted gene 11646	NA		Gm11646
ENSMUSG00000100204	0.0865589	0.238855	0.0848655	0.0465294	-3.4404	-1.78258	0.134904	0.999998	306	predicted gene 4849	NA		Gm4849
ENSMUSG00000081232	0.172102	0.49719	0.150813	0.0968536	-3.12235	-1.64263	0.0979112	0.999998	307	predicted gene 14373	NA		Gm14373
ENSMUSG00000107035	0.759518	0.271302	0.111745	0.236604	3.05348	1.61045	0.0914284	0.999998	308	Y box protein 1, pseudogene 2	NA		Ybx1-ps2
ENSMUSG00000082145	1.02434	0.367276	0.645678	0.482749	3.18731	1.67234	0.110884	0.999998	309	predicted gene 12312	NA		Gm12312
ENSMUSG00000104235	0.147244	0.482858	0.128726	0.289903	-3.42699	-1.77694	0.136981	0.999998	310	predicted gene, 37589	NA		Gm37589
ENSMUSG00000114104	0.421188	0.744921	0.620453	0.373233	-3.59372	-1.84548	0.14912	0.999998	311		NA		CT009757.7
ENSMUSG00000083268	0.305512	1.24302	0.284844	0.183158	-3.02994	-1.59929	0.0915817	0.999998	312	predicted gene 11511	NA		Gm11511
ENSMUSG00000099470	0.129317	0.425485	0.0293654	0.148671	-2.83342	-1.50254	0.0591108	0.999998	313	predicted gene 29340	NA		Gm29340
ENSMUSG00000106320	0.0887628	0.0981909	0.153742	0.0144683	-3.96104	-1.98588	0.170337	0.999998	314	predicted gene 42992	NA		Gm42992
ENSMUSG00000082348	0.101167	0.648256	0.0990763	0.416228	-3.34065	-1.74013	0.131102	0.999998	315	predicted gene 12807	NA		Gm12807
ENSMUSG00000102732	0.0603861	0.213312	0.0215695	0.0964069	-2.86285	-1.51745	0.0686137	0.999998	316	predicted gene, 37342	NA		Gm37342
ENSMUSG00000103085	0.23184	0.657662	0.177532	0.142609	-3.12403	-1.64341	0.104546	0.999998	317	predicted gene, 38120	NA		Gm38120
ENSMUSG00000059991	0.32549	0.418107	0.563765	0.246491	-4.17976	-2.06342	0.183573	0.999998	318	neuronal pentraxin 2	53324	53324	Nptx2
ENSMUSG00000023903	0.170489	0.387451	0.295295	0.235008	-3.73329	-1.90045	0.16058	0.999998	319	matrix metallopeptidase 25	240047	240047	Mmp25
ENSMUSG00000040694	0.593925	4.36264	0.525761	5.72833	-4.10358	-2.03688	0.17994	0.999998	320	apolipoprotein B mRNA editing enzyme, catalytic polypeptide 2	11811	11811	Apobec2
ENSMUSG00000030589	0.0923505	0.0253382	0.0496516	0.043887	3.37785	1.7561	0.135693	0.999998	321	RAS guanyl releasing protein 4	233046	233046	Rasgrp4
ENSMUSG00000034438	0.397173	0.124359	0.267444	0.168467	3.61434	1.85373	0.155615	0.999998	322	guanylate-binding protein 8	76074	76074	Gbp8
ENSMUSG00000067017	8.02528	0.788506	7.17157	0.233333	4.51631	2.17514	0.195454	0.999998	323	predicted gene 3608	NA		Gm3608
ENSMUSG00000113428	0.181621	0.753783	0.314577	0.263511	-3.21953	-1.68685	0.121751	0.999998	324		NA		AC122357.1
ENSMUSG00000045942	0.135819	0.592796	0.235246	0.317354	-4.11832	-2.04206	0.182742	0.999998	325	cDNA sequence BC049762	193286	193286	BC049762
ENSMUSG00000030074	0.042665	0.173427	0.0297445	0.0932913	-3.63693	-1.86272	0.158218	0.999998	326	glucoside xylosyltransferase 2	232313	232313	Gxylt2
ENSMUSG00000108643	0.929302	2.58325	0.809875	0.570169	-3.22108	-1.68754	0.122802	0.999998	327	predicted gene 44931	NA		Gm44931
ENSMUSG00000085093	0.17516	0.748151	0.303386	0.758762	-3.58927	-1.84369	0.156465	0.999998	328	predicted gene 12737	NA		Gm12737
ENSMUSG00000085962	1.36064	0.413421	0.704327	0.415757	3.38853	1.76066	0.139924	0.999998	329	predicted gene, 16984	NA		Gm16984
ENSMUSG00000101880	0.490831	1.84229	0.329302	0.609624	-3.2367	-1.69452	0.126771	0.999998	330	predicted gene 29282	NA		Gm29282
ENSMUSG00000080626	2.23649	7.83525	3.87372	3.18061	-3.93461	-1.97622	0.178229	0.999998	331	microRNA 1192	NA		Mir1192
ENSMUSG00000103432	0.129515	0.39627	0.136711	0.164097	-3.23251	-1.69265	0.128076	0.999998	332	RIKEN cDNA 6720464F23 gene	NA		6720464F23Rik
ENSMUSG00000097712	0.216596	0.0887102	0.0491849	0.0904765	3.17586	1.66715	0.121838	0.999998	333	predicted gene 10532	NA		Gm10532
ENSMUSG00000104121	0.0343653	0.155708	0.0595225	0.0484791	-2.99322	-1.5817	0.098626	0.999998	334	predicted gene, 37485	NA		Gm37485
ENSMUSG00000002324	0.0816279	0.512872	0.11095	0.699875	-4.10304	-2.03669	0.185853	0.999998	335	REC8 meiotic recombination protein	56739	56739	Rec8
ENSMUSG00000097505	0.411727	0.503799	0.713132	0.197318	-3.70396	-1.88907	0.164763	0.999998	336	predicted gene, 26540	NA		Gm26540
ENSMUSG00000030739	0.0633992	0.216181	0.0573384	0.115906	-3.157	-1.65855	0.121244	0.999998	337	myosin, heavy polypeptide 14	71960	71960	Myh14
ENSMUSG00000103482	0.219794	0.718723	0.224532	0.253651	-3.24151	-1.69666	0.131603	0.999998	338	predicted gene, 37999	NA		Gm37999
ENSMUSG00000059064	5.82635	1.75405	3.18064	1.53183	3.20366	1.67972	0.125445	0.999998	339	predicted pseudogene 10059	NA		Gm10059
ENSMUSG00000085012	1.30383	0.355409	0.284743	0.0390617	2.93871	1.55518	0.0944018	0.999998	340	predicted gene 15492	NA		Gm15492
ENSMUSG00000113423	0.258858	1.17087	0.264439	0.901972	-3.32181	-1.73197	0.142633	0.999998	341		NA		AC132954.2
ENSMUSG00000106856	0.170199	0.54134	0.212375	0.105454	-3.1278	-1.64515	0.12062	0.999998	342	predicted gene 43761	NA		Gm43761
ENSMUSG00000105124	0.0577744	0.311998	0.100068	0.128363	-2.92285	-1.54737	0.0952736	0.999998	343	predicted gene 5297	NA		Gm5297
ENSMUSG00000084936	2.95233	0.792491	2.19796	0.702688	3.6429	1.86509	0.166996	0.999998	344	predicted gene 11583	NA		Gm11583
ENSMUSG00000107794	1.2608	2.27634	1.83294	1.22966	-3.93263	-1.97549	0.184162	0.999998	345	predicted gene, 44095	NA		Gm44095
ENSMUSG00000087016	0.858423	2.65482	0.748105	1.70955	-3.17544	-1.66695	0.127408	0.999998	346	predicted gene 15979	NA		Gm15979
ENSMUSG00000085718	1.03381	0.297082	0.351789	0.348919	3.18681	1.67211	0.130124	0.999998	347	ribosomal protein L9, pseudogene 3	NA		Rpl9-ps3
ENSMUSG00000110350	3.58998	1.17275	3.19474	1.25767	3.94022	1.97828	0.186035	0.999998	348	predicted gene 10252	NA		Gm10252
ENSMUSG00000104903	0.0529236	0.177446	0.0660382	0.022928	-3.20509	-1.68036	0.133671	0.999998	349	predicted gene 43707	NA		Gm43707
ENSMUSG00000087057	0.244545	1.00417	0.244827	0.284271	-3.44661	-1.78518	0.157217	0.999998	350	predicted gene 11730	NA		Gm11730
ENSMUSG00000109416	0.403415	0.0283451	0.428614	0.0490951	3.57243	1.83691	0.162458	0.999998	351	predicted gene 44863	NA		Gm44863
ENSMUSG00000106822	0.183707	0.280583	0.318189	0.177593	-3.87399	-1.95382	0.183893	0.999998	352	predicted gene 43533	NA		Gm43533
ENSMUSG00000021086	0.193073	0.0153725	0.19285	0.026626	3.40631	1.76821	0.153399	0.999998	353	coiled-coil domain containing 175	73936	73936	Ccdc175
ENSMUSG00000108276	0.0227627	0.114012	0.0197132	0.085695	-3.21149	-1.68324	0.135275	0.999998	354	predicted gene, 44276	NA		Gm44276
ENSMUSG00000021263	0.0523839	0.207692	0.0907316	0.0404588	-3.21415	-1.68444	0.137311	0.999998	355	delta(4)-desaturase, sphingolipid 2	70059	70059	Degs2
ENSMUSG00000034177	0.0148403	0.0839147	0.0145336	0.0425374	-3.15545	-1.65785	0.132624	0.999998	356	ring finger protein 43	207742	207742	Rnf43
ENSMUSG00000103467	1.12859	3.08603	1.11989	1.31146	-2.96167	-1.56641	0.110492	0.999998	357	predicted gene, 38245	NA		Gm38245
ENSMUSG00000026535	18.5055	0	19.9798	0	33.7061	5.07494	0.241854	0.999998	358	interferon activated gene 202B	26388	26388/100044068	Ifi202b
ENSMUSG00000112026	0.124859	0.49552	0.15318	0.305771	-3.20195	-1.67895	0.141789	0.999998	359		NA		AC168315.1
ENSMUSG00000097019	0.246844	0.147413	0.0657805	0.255327	3.45623	1.7892	0.164371	0.999998	360	predicted gene, 26663	NA		Gm26663
ENSMUSG00000102875	0.447398	1.25045	0.294311	0.106792	-2.75712	-1.46316	0.0760496	0.999998	361	predicted gene, 37139	NA		Gm37139
ENSMUSG00000030124	0.1582	0.531601	0.058786	0.139435	-2.75007	-1.45947	0.0725255	0.999998	362	lymphocyte-activation gene 3	16768	16768	Lag3
ENSMUSG00000086855	0.523595	1.54538	0.629934	0.418188	-2.98103	-1.57581	0.119587	0.999998	363	predicted gene 13844	NA		Gm13844
ENSMUSG00000113688	0.0454816	0.209419	0.0787764	0.167872	-3.09891	-1.63176	0.13364	0.999998	364		NA		CT009754.5
ENSMUSG00000061992	1.16332	0.514246	0.1043	0.685416	2.95293	1.56215	0.117994	0.999998	365	predicted pseudogene 4953	NA		Gm4953
ENSMUSG00000026166	2.48578	0.190634	3.76435	0.216155	4.45162	2.15433	0.2158	0.999998	366	chemokine (C-C motif) ligand 20	20297	20297	Ccl20
ENSMUSG00000082969	1.06597	0.274716	0.674353	0.0301931	2.83447	1.50308	0.100393	0.999998	367	predicted gene 12630	NA		Gm12630
ENSMUSG00000040432	1.53554	0.21626	1.96068	0.259619	3.90579	1.96562	0.196169	0.999998	368	leukotriene B4 receptor 2	57260	57260	Ltb4r2
ENSMUSG00000080971	0.161737	0.706088	0.161551	0.418947	-2.96865	-1.56981	0.121853	0.999998	369	predicted gene 16128	NA		Gm16128
ENSMUSG00000021211	0.834035	0.242572	0.44472	0.197253	2.99296	1.58157	0.124034	0.999998	370	aldo-keto reductase family 1, member C12	622402	622402	Akr1c12
ENSMUSG00000048621	0.658442	0.213214	0.407998	0.138228	2.85482	1.5134	0.108082	0.999998	371	predicted gene 6377	622976	622976	Gm6377
ENSMUSG00000085078	2.16357	3.88061	3.00695	3.01653	-3.57718	-1.83882	0.182535	0.999998	372	RIKEN cDNA C030013C21 gene	NA		C030013C21Rik
ENSMUSG00000083879	0.617579	0.248043	0.140241	0.243294	3.1599	1.65988	0.146319	0.999998	373	predicted gene 14038	NA		Gm14038
ENSMUSG00000037827	0.670823	0.248369	0.410451	0.361701	3.41406	1.77149	0.168869	0.999998	374	predicted pseudogene 5884	NA		Gm5884
ENSMUSG00000025478	0.295593	0.781645	0.351535	0.434445	-3.1396	-1.65058	0.144845	0.999998	375	dihydropyrimidinase-like 4	26757	26757	Dpysl4
ENSMUSG00000065728	8.46993	2.20372	7.87244	2.40257	3.30026	1.72258	0.16031	0.999998	376	predicted gene, 26175	NA		Gm26175
ENSMUSG00000069117	2.08184	1.2997	1.05728	1.53445	3.36968	1.75261	0.165915	0.999998	377	predicted gene 10260	NA		Gm10260
ENSMUSG00000032591	0.101004	0.421139	0.0890931	0.272608	-3.12579	-1.64422	0.143703	0.999998	378	macrophage stimulating 1 (hepatocyte growth factor-like)	15235	15235	Mst1
ENSMUSG00000049357	0.897456	2.24692	0.804646	0.32496	-2.7552	-1.46216	0.0907308	0.999998	379	RIKEN cDNA 4933408B17 gene	271508	271508	4933408B17Rik
ENSMUSG00000029275	0.0833876	0.176206	0.097369	0.0615989	-3.15809	-1.65905	0.148222	0.999998	380	growth factor independent 1	14581	14581	Gfi1
ENSMUSG00000100291	0.222336	0.807535	0.156703	0.545376	-2.82817	-1.49987	0.106032	0.999998	381	RIKEN cDNA 2310069B03 gene	NA		2310069B03Rik
ENSMUSG00000108207	0.227083	0.682857	0.192949	0.305313	-2.79037	-1.48046	0.0997646	0.999998	382	RIKEN cDNA 1810059H22 gene	NA		1810059H22Rik
ENSMUSG00000073274	0.156725	0.540943	0.0552944	0.0989879	-2.99404	-1.58209	0.132909	0.999998	383	predicted gene 14636	NA		Gm14636
ENSMUSG00000110088	1.29587	3.834	0.875375	0.936019	-2.84488	-1.50837	0.115277	0.999998	384	predicted gene 45343	NA		Gm45343
ENSMUSG00000000182	0.0745908	1.15837	0.129195	1.49911	-4.51679	-2.1753	0.226985	0.999998	385	fibroblast growth factor 23	64654	64654	Fgf23
ENSMUSG00000003469	0.191818	0.0515366	0.106296	0.0450075	3.02038	1.59473	0.137563	0.999998	386	phytanoyl-CoA hydroxylase interacting protein	105653	105653	Phyhip
ENSMUSG00000097993	0.0809799	0.262955	0.031477	0.104755	-2.68784	-1.42645	0.0737688	0.999998	387	protein tyrosine phosphatase, receptor type, V	NA		Ptprv
ENSMUSG00000034145	0.20444	0.0767393	0.103119	0.0663898	2.81872	1.49504	0.113748	0.999998	388	transmembrane protein 63c	217733	217733	Tmem63c
ENSMUSG00000001622	0.234534	0.0167047	0.345493	0.0289334	3.76914	1.91424	0.200372	0.999998	389	casein kappa	12994	12994	Csn3
ENSMUSG00000092085	1.27384	0.219329	1.35391	0.208985	3.05596	1.61163	0.143802	0.999998	390	predicted gene 17224	NA		Gm17224
ENSMUSG00000071531	0.404391	0.988721	0.416951	0.208908	-3.13095	-1.6466	0.152933	0.999998	391	G protein regulated inducer of neurite outgrowth 2	432839	432839	Gprin2
ENSMUSG00000031391	1.22889	4.0995	0.933517	2.24221	-2.94172	-1.55666	0.133968	0.999998	392	L1 cell adhesion molecule	16728	16728	L1cam
ENSMUSG00000082908	10.9478	2.68196	7.25221	1.63224	3.17589	1.66716	0.158838	0.999998	393	predicted gene 13736	NA		Gm13736
ENSMUSG00000102321	0.0285152	0.272159	0.027926	0.236423	-3.58706	-1.8428	0.193497	0.999998	394	predicted gene, 37792	NA		Gm37792
ENSMUSG00000022383	0.00881828	0.131922	0.0152737	0.113941	-3.52851	-1.81906	0.188113	0.999998	395	peroxisome proliferator activated receptor alpha	19013	19013	Ppara
ENSMUSG00000102893	0.0343219	0.156585	0.0594473	0.107495	-3.66347	-1.87321	0.197814	0.999998	396	predicted gene, 37855	NA		Gm37855
ENSMUSG00000080893	1.30323	0.300796	0.717818	0.520995	3.03471	1.60156	0.145001	0.999998	397	predicted gene 15920	NA		Gm15920
ENSMUSG00000103572	0.142397	0.426467	0.188529	0.180788	-3.31564	-1.72929	0.174042	0.999998	398	predicted gene, 37115	NA		Gm37115
ENSMUSG00000111434	1.01059	2.56648	0.947638	1.07594	-3.12683	-1.6447	0.155434	0.999998	399		NA		AC120394.2
ENSMUSG00000097633	1.22507	0.37802	1.00392	0.327797	3.56709	1.83475	0.19108	0.999998	400	predicted gene, 16617	NA		Gm16617
ENSMUSG00000112067	1.05086	2.40136	1.24095	0.954096	-3.48412	-1.8008	0.187902	0.999998	401		NA		AC125487.1
ENSMUSG00000001027	0.0239551	0.0710287	0.0298912	0.0165832	-2.88235	-1.52725	0.127815	0.999998	402	sodium channel, voltage-gated, type IV, alpha	110880	110880	Scn4a
ENSMUSG00000108976	1.10723	0.285268	0.558482	0.0313529	2.99869	1.58433	0.143256	0.999998	403	predicted gene, 29797	101056205	101056205	Gm29797
ENSMUSG00000102452	0.891315	1.52248	1.17189	0.584661	-3.04025	-1.60419	0.147131	0.999998	404	predicted gene, 38344	NA		Gm38344
ENSMUSG00000087596	0.425744	0.0997957	0.129011	0.172851	3.30577	1.72499	0.17515	0.999998	405	predicted gene 11715	NA		Gm11715
ENSMUSG00000090260	0.182257	0.843628	0.315679	0.734879	-3.28665	-1.71662	0.174082	0.999998	406	RIKEN cDNA 2810442N19 gene	NA		2810442N19Rik
ENSMUSG00000085606	1.87357	0.527511	0.986907	0.265791	2.78904	1.47977	0.114776	0.999998	407	predicted gene 15792	NA		Gm15792
ENSMUSG00000079625	0.238332	0.848236	0.214589	0.711403	-3.00105	-1.58547	0.145671	0.999998	408	transmembrane 4 L six family member 19	277203	277203	Tm4sf19
ENSMUSG00000046620	1.49935	0.361011	1.50122	0.424002	3.04434	1.60613	0.149565	0.999998	409	ribosomal protein S11, pseudogene 4	NA		Rps11-ps4
ENSMUSG00000097007	0.0933549	0.308001	0.0914258	0.0949581	-2.85893	-1.51547	0.130317	0.999998	410	RIKEN cDNA 4930432B10 gene	NA		4930432B10Rik
ENSMUSG00000029348	0.555529	1.95847	0.2198	1.38131	-2.85159	-1.51177	0.129876	0.999998	411	aspartate beta-hydroxylase domain containing 2	72898	72898	Asphd2
ENSMUSG00000084984	0.299472	0.0732184	0.100894	0.126818	2.89434	1.53323	0.134436	0.999998	412	fatty acyl CoA reductase 1, opposite strand	NA		Far1os
ENSMUSG00000072962	0.88306	2.21166	0.614579	0.0568383	-2.72244	-1.4449	0.0990165	0.999998	413	predicted gene 16401	NA		Gm16401
ENSMUSG00000025963	0.117934	0.487726	0.11807	0.284219	-3.1563	-1.65824	0.162119	0.999998	414	malate dehydrogenase 1B, NAD (soluble)	76668	76668	Mdh1b
ENSMUSG00000113936	0.386085	0.119247	0.262895	0.140054	2.8933	1.53272	0.136832	0.999998	415		NA		AC131743.6
ENSMUSG00000060429	0.145948	0.84392	0.162058	0.71532	-3.81476	-1.93159	0.213489	0.999998	416	syntrophin, basic 1	20649	20649	Sntb1
ENSMUSG00000109314	0.496609	1.14052	0.368387	0.251968	-2.77864	-1.47438	0.119665	0.999998	417	predicted gene 44699	NA		Gm44699
ENSMUSG00000039131	1.17296	0.342955	1.02296	0.237195	3.15496	1.65762	0.164133	0.999998	418	GIPC PDZ domain containing family, member 2	54120	54120	Gipc2
ENSMUSG00000071178	0.0821268	0.291361	0.0837992	0.200824	-3.85939	-1.94837	0.215897	0.999998	419	serine (or cysteine) preptidase inhibitor, clade A, member 1B	20701	20701	Serpina1b
ENSMUSG00000097557	0.662867	0.210576	0.42675	0.121391	2.8023	1.48661	0.124822	0.999998	420	RIKEN cDNA C130060C02 gene	NA		C130060C02Rik
ENSMUSG00000097165	0.304731	1.06303	0.102666	0.313943	-2.74897	-1.45889	0.110769	0.999998	421	RIKEN cDNA 2210008F06 gene	NA		2210008F06Rik
ENSMUSG00000033227	0.138462	0.533118	0.201066	0.614102	-3.36558	-1.75085	0.18782	0.999998	422	wingless-type MMTV integration site family, member 6	22420	22420	Wnt6
ENSMUSG00000041954	0.570417	0.138731	0.432016	0.129907	3.29595	1.7207	0.183337	0.999998	423	tumor necrosis factor receptor superfamily, member 18	21936	21936	Tnfrsf18
ENSMUSG00000086503	197.54	128.885	131.832	114.481	13.1992	3.72238	0.265408	0.999998	424	inactive X specific transcripts	NA		Xist
ENSMUSG00000102841	0.208218	0.377783	0.268126	0.0353165	-3.0956	-1.63022	0.160873	0.999998	425	predicted gene, 38036	NA		Gm38036
ENSMUSG00000093668	0.166545	0.615609	0.111736	0.390458	-2.99162	-1.58092	0.150816	0.999998	426	POU domain class 5, transcription factor 2	75507	75507	Pou5f2
ENSMUSG00000042256	0.340591	0.0513924	0.300917	0.0341143	3.58322	1.84126	0.203884	0.999998	427	patched domain containing 4	627626	627626	Ptchd4
ENSMUSG00000104436	0.240084	0.706131	0.109197	0.151224	-2.65535	-1.4089	0.0889964	0.999998	428	predicted gene, 37423	NA		Gm37423
ENSMUSG00000081730	0.331119	1.26863	0.29207	0.34253	-3.16098	-1.66037	0.173313	0.999998	429	predicted gene 13785	NA		Gm13785
ENSMUSG00000085669	0.459811	1.48152	0.262169	0.959005	-2.76736	-1.46851	0.124862	0.999998	430	predicted gene 14817	NA		Gm14817
ENSMUSG00000035451	1.43095	0.219037	1.81448	0.178107	3.92646	1.97323	0.225544	0.999998	431	forkhead box A1	15375	15375	Foxa1
ENSMUSG00000084087	0.302346	1.09703	0.262192	0.558066	-3.39948	-1.76531	0.196875	0.999998	432	predicted gene 13650	NA		Gm13650
ENSMUSG00000106357	2.13901	0.679193	1.13078	0.587593	2.89233	1.53223	0.146048	0.999998	433	predicted gene 8013	NA		Gm8013
ENSMUSG00000106364	0.052991	0.210462	0.0458918	0.0409985	-2.95545	-1.56338	0.155086	0.999998	434	predicted gene 42994	NA		Gm42994
ENSMUSG00000098028	0.601962	0.176839	0.206831	0.0477466	2.93531	1.55352	0.151097	0.999998	435	predicted gene 8824	NA		Gm8824
ENSMUSG00000042655	0.454383	0.0806969	0.308928	0.0755644	3.12281	1.64285	0.168736	0.999998	436	family with sequence similarity 159, member B	77803	77803	Fam159b
ENSMUSG00000097981	0.491769	0.160425	0.164483	0.277864	2.92263	1.54727	0.150106	0.999998	437	predicted gene 7583	NA		Gm7583
ENSMUSG00000105867	0.508086	1.04802	0.792534	1.24136	-4.22274	-2.07818	0.238869	0.999998	438	predicted gene 42517	NA		Gm42517
ENSMUSG00000103976	0.29594	0.771363	0.250291	0.520363	-3.00416	-1.58696	0.1601	0.999998	439	predicted gene, 37677	NA		Gm37677
ENSMUSG00000109399	1.42607	3.98375	1.09704	1.25198	-2.682	-1.42331	0.0993704	0.999998	440	predicted gene 44982	NA		Gm44982
ENSMUSG00000094251	2.6879	8.71283	2.37093	1.41334	-2.79465	-1.48267	0.133016	0.999998	441	predicted gene, 25632	NA		Gm25632
ENSMUSG00000075073	0.320263	0.0872333	0.342395	0.0864633	3.4094	1.76952	0.199208	0.999998	442	olfactory receptor 1256	258985	258985	Olfr1256
ENSMUSG00000056071	0.129158	0.806251	0.223708	0.810805	-3.26901	-1.70886	0.189533	0.999998	443	S100 calcium binding protein A9 (calgranulin B)	20202	20202	S100a9
ENSMUSG00000052616	0.293744	0.0800061	0.2597	0.0698702	3.02044	1.59476	0.163927	0.999998	444	telomere repeat binding bouquet formation protein 1	320022	320022	Terb1
ENSMUSG00000092819	4.96601	13.8241	3.021	2.44191	-2.64498	-1.40326	0.0971106	0.999998	445	predicted gene, 23639	NA		Gm23639
ENSMUSG00000081651	0.783588	2.30346	0.391738	0.837115	-2.61399	-1.38626	0.0873079	0.999998	446	predicted gene 15530	NA		Gm15530
ENSMUSG00000010592	0.100496	0.274426	0.0572993	0.118443	-2.71733	-1.44219	0.116204	0.999998	447	deleted in azoospermia-like	13164	13164	Dazl
ENSMUSG00000110686	1.19147	0.469272	0.522139	0.481356	2.96225	1.56669	0.159895	0.999998	448	predicted gene 45855	NA		Gm45855
ENSMUSG00000109302	0.536084	1.19778	0.928525	0.229669	-3.06555	-1.61615	0.168826	0.999998	449	predicted gene 44967	NA		Gm44967
ENSMUSG00000091697	10.9885	1.48421	8.14254	0.523806	4.2672	2.09329	0.244437	0.999998	450	eukaryotic translation initiation factor 3, subunit 6, pseudogene 2	NA		Eif3s6-ps2
ENSMUSG00000039084	0.838915	0.194662	1.15349	0.337164	3.93744	1.97726	0.230969	0.999998	451	chondroadherin	12643	12643	Chad
ENSMUSG00000102157	0.0710519	0.270121	0.0725837	0.0517946	-3.07337	-1.61982	0.171552	0.999998	452	predicted gene, 37470	NA		Gm37470
ENSMUSG00000102850	1.83201	4.88633	1.29139	0.969659	-3.0347	-1.60156	0.167179	0.999998	453	predicted gene, 37082	NA		Gm37082
ENSMUSG00000106696	0.112532	0.0275131	0.0379129	0.0476541	2.89293	1.53253	0.154328	0.999998	454	predicted gene 42729	NA		Gm42729
ENSMUSG00000104990	0.489094	1.4173	0.111064	0.462594	-2.54717	-1.34889	0.072728	0.999998	455	predicted gene 43504	NA		Gm43504
ENSMUSG00000068762	1.04274	3.02617	0.418767	1.35852	-2.62811	-1.39403	0.0954363	0.999998	456	glutathione S-transferase, mu 6	14867	14867	Gstm6
ENSMUSG00000058794	0.62276	1.5944	0.619196	0.780874	-2.90131	-1.5367	0.156131	0.999998	457	nuclear factor, erythroid derived 2	18022	18022	Nfe2
ENSMUSG00000089796	0.209455	0.467986	0.362786	0.0897345	-3.06213	-1.61454	0.172467	0.999998	458	predicted gene 16575	NA		Gm16575
ENSMUSG00000046610	0.472011	0.148292	0.292652	0.082172	2.72109	1.44418	0.122147	0.999998	459	O-acyltransferase like	319888	319888	Oacyl
ENSMUSG00000034634	0.397705	0.186446	0.120514	0.322934	2.8629	1.51748	0.155562	0.999998	460	lymphocyte antigen 6 complex, locus D	17068	17068	Ly6d
ENSMUSG00000034488	0.217497	1.25039	0.306188	1.75211	-4.70532	-2.23429	0.259619	0.999998	461	EGF-like repeats and discoidin I-like domains 3	13612	13612	Edil3
ENSMUSG00000020080	0.0518297	0.007854	0.0234088	0.0136035	2.75951	1.46441	0.137071	0.999998	462	hexokinase domain containing 1	216019	216019	Hkdc1
ENSMUSG00000028804	0.00198085	0.215918	0.00343093	0.361786	-5.07442	-2.34324	0.265912	0.999998	463	CUB and Sushi multiple domains 2	329942	329942	Csmd2
ENSMUSG00000093548	2.06165	0.917059	0.610748	0.796034	2.86588	1.51898	0.157172	0.999998	464	predicted gene 6407	NA		Gm6407
ENSMUSG00000102474	0.722254	2.07757	0.464236	0.859726	-2.68791	-1.42648	0.119614	0.999998	465	RIKEN cDNA 2610012C04 gene	NA		2610012C04Rik
ENSMUSG00000113113	2.13021	6.06226	1.52517	1.79853	-2.65702	-1.40981	0.113516	0.999998	466		NA		AC159818.1
ENSMUSG00000084052	0.753501	2.21057	0.689983	1.15938	-2.90587	-1.53897	0.161576	0.999998	467	predicted gene 11745	NA		Gm11745
ENSMUSG00000109059	0.343628	1.06017	0.421573	0.185746	-2.82019	-1.49579	0.152181	0.999998	468	predicted gene 9354	NA		Gm9354
ENSMUSG00000034427	0.0642651	0.0229921	0.022741	0.02468	2.73324	1.45061	0.133488	0.999998	469	myosin XVB	NA		Myo15b
ENSMUSG00000074357	0.456857	1.10099	0.540834	0.743528	-3.2767	-1.71225	0.202723	0.999998	470	expressed sequence AA386476	NA		AA386476
ENSMUSG00000025934	0.306158	0.101438	0.138276	0.076578	3.36337	1.74991	0.208119	0.999998	471	glutathione S-transferase, alpha 3	14859	14859	Gsta3
ENSMUSG00000030703	16.5755	3.47365	23.0871	1.40602	3.18553	1.67153	0.195042	0.999998	472	glycerophosphodiester phosphodiesterase domain containing 3	68616	68616	Gdpd3
ENSMUSG00000111409	0.223728	0.0726645	0.0430983	0.00798631	2.55893	1.35554	0.0928265	0.999998	473	ring finger protein 26	NA		Rnf26
ENSMUSG00000040138	0.375224	1.97754	0.366678	2.3417	-3.40099	-1.76595	0.214019	0.999998	474	Norrie disease (pseudoglioma) (human)	17986	17986	Ndp
ENSMUSG00000106671	0.28098	0.573462	0.486672	0.296576	-3.44942	-1.78635	0.217065	0.999998	475	predicted gene 42900	NA		Gm42900
ENSMUSG00000059040	0.0361386	3.85981	0.0625939	3.6374	-11.8591	-3.56792	0.283665	0.999998	476	enolase 1B, retrotransposed	433182	433182	Eno1b
ENSMUSG00000029370	0.480647	0.0994018	0.332249	0.0832872	3.89065	1.96001	0.240958	0.999998	477	Ras association (RalGDS/AF-6) domain family member 6	73246	73246	Rassf6
ENSMUSG00000091021	1.7249	0.588386	1.21812	0.349669	2.6933	1.42938	0.124979	0.999998	478	predicted gene, 17300	NA		Gm17300
ENSMUSG00000113774	0.758887	0.229995	0.342751	0.398364	3.14343	1.65234	0.191933	0.999998	479		NA		AC159307.1
ENSMUSG00000080774	1.06615	0.402608	0.0376316	0.351602	2.98096	1.57578	0.17549	0.999998	480	predicted gene 9143	NA		Gm9143
ENSMUSG00000043024	0.368338	0.158159	0.069549	0.136829	2.6865	1.42573	0.12491	0.999998	481	predicted gene 16433	NA		Gm16433
ENSMUSG00000075502	0.275069	0.870494	0.126725	0.48433	-2.64235	-1.40182	0.115684	0.999998	482	kelch repeat and BTB (POZ) domain containing 6	432879	432879	Kbtbd6
ENSMUSG00000019767	0.0523654	0.181023	0.00184834	0.0368411	-2.62759	-1.39374	0.11154	0.999998	483	coiled-coil domain containing 170	100504234	100504234	Ccdc170
ENSMUSG00000102305	0.358778	0.110516	0.276902	0.112716	3.04719	1.60748	0.185187	0.999998	484	predicted gene, 38192	NA		Gm38192
ENSMUSG00000081683	3.95548	9.70177	3.26416	6.98593	-3.00109	-1.58549	0.182569	0.999998	485	frizzled class receptor 10	93897	93897	Fzd10
ENSMUSG00000099746	0.162872	0.455788	0.141825	0.280698	-2.98912	-1.57972	0.182144	0.999998	486	per-pentamer repeat gene	NA		Ppnr
ENSMUSG00000104937	2.56461	4.79107	2.66972	1.03671	-2.91186	-1.54194	0.171703	0.999998	487	predicted gene 43057	NA		Gm43057
ENSMUSG00000108521	0.056132	0.238445	0.0514917	0.189028	-2.75032	-1.4596	0.147522	0.999998	488	predicted gene 44639	NA		Gm44639
ENSMUSG00000064225	0.313347	0.0234515	0.48241	0.0406192	5.60215	2.48598	0.277312	0.999998	489	progestin and adipoQ receptor family member IX	75552	75552	Paqr9
ENSMUSG00000094683	0.771512	0.203247	0.599475	0.0738631	2.6678	1.41565	0.127663	0.999998	490	adaptor-related protein complex 3, mu 1 subunit, pseudogene	NA		Ap3m1-ps
ENSMUSG00000038227	0.0810606	0.217855	0.0856653	0.237758	-3.38459	-1.75898	0.219748	0.999998	491	homeobox A9	15405	15405	Hoxa9
ENSMUSG00000087684	0.229063	0.921406	0.144856	0.616739	-2.92705	-1.54945	0.179896	0.999998	492	RIKEN cDNA 1200007C13 gene	NA		1200007C13Rik
ENSMUSG00000048373	0.560957	0.153243	0.680134	0.265425	4.3368	2.11663	0.262589	0.999998	493	fibroblast growth factor binding protein 1	14181	14181	Fgfbp1
ENSMUSG00000022548	0.361214	2.12553	0.455789	2.85139	-3.79738	-1.92501	0.243122	0.999998	494	apolipoprotein D	11815	11815	Apod
ENSMUSG00000089525	1.87557	0.159947	1.67213	0.277037	3.442	1.78325	0.225753	0.999998	495	predicted gene, 23833	NA		Gm23833
ENSMUSG00000105230	0.21542	0.629768	0.215172	0.346068	-2.70779	-1.43712	0.142884	0.999998	496	predicted gene 42433	NA		Gm42433
ENSMUSG00000029695	0.106101	0.0171355	0.105979	0.0296796	3.07028	1.61837	0.195148	0.999998	497	aminoadipate-semialdehyde synthase	30956	30956	Aass
ENSMUSG00000103030	2.38854	0.942723	1.25885	0.429368	2.61522	1.38693	0.119791	0.999998	498	RIKEN cDNA E330011M16 gene	NA		E330011M16Rik
ENSMUSG00000105431	0.33253	1.07528	0.17055	0.291205	-2.61748	-1.38818	0.121674	0.999998	499	predicted gene 42640	NA		Gm42640
ENSMUSG00000058260	0	0.0654538	0	0.0377324	-3.45637	-1.78926	0.228786	0.999998	500	serine (or cysteine) peptidase inhibitor, clade A (alpha-1 antiproteinase, antitrypsin), member 9	71907	71907	Serpina9
ENSMUSG00000095562	9.80731	4.53119	3.95444	3.469	2.7777	1.47389	0.159911	0.999998	501	predicted gene, 21887	NA		Gm21887
ENSMUSG00000111528	0.390386	0.086623	0.130573	0.0825376	3.17647	1.66742	0.206094	0.999998	502		NA		AC145731.3
ENSMUSG00000074203	3.05302	1.30397	1.10058	1.08622	2.67517	1.41963	0.134183	0.999998	503	RIKEN cDNA G430095P16 gene	NA		G430095P16Rik
ENSMUSG00000024109	0.037235	0.0128094	0.0361587	0.0143979	3.14001	1.65077	0.203858	0.999998	504	neurexin I	18189	18189	Nrxn1
ENSMUSG00000103854	0.113127	0.328664	0.0979717	0.0969963	-2.71624	-1.44161	0.146403	0.999998	505	predicted gene, 37250	NA		Gm37250
ENSMUSG00000031994	0.246758	0	0.358263	0	4.14346	2.05083	0.261228	0.999998	506	a disintegrin-like and metallopeptidase (reprolysin type) with thrombospondin type 1 motif, 8	30806	30806	Adamts8
ENSMUSG00000106069	2.42655	0.481244	2.60926	0.575462	3.36537	1.75076	0.223946	0.999998	507	prediticted gene 6135	NA		Gm6135
ENSMUSG00000019876	0.287532	0.748279	0.287743	0.524587	-2.79835	-1.48458	0.165929	0.999998	508	protein kinase inhibitor beta, cAMP dependent, testis specific	18768	18768	Pkib
ENSMUSG00000063727	1.22075	0.265128	1.11483	0.258691	4.19226	2.06773	0.263156	0.999998	509	tumor necrosis factor receptor superfamily, member 11b (osteoprotegerin)	18383	18383	Tnfrsf11b
ENSMUSG00000103710	0.222872	0.0807673	0.0457185	0.0866965	2.67944	1.42193	0.137503	0.999998	510	RIKEN cDNA D030062O11 gene	NA		D030062O11Rik
ENSMUSG00000114081	0.0902705	0.186047	0.105406	0.109085	-3.04263	-1.60532	0.196565	0.999998	511		NA		AC136986.2
ENSMUSG00000103751	0.105014	0.408772	0.0979096	0.126026	-2.92146	-1.54669	0.186648	0.999998	512	predicted gene, 37283	NA		Gm37283
ENSMUSG00000018927	0.18806	1.02285	0.172208	0.817149	-4.00339	-2.00122	0.258538	0.999998	513	chemokine (C-C motif) ligand 6	20305	20305	Ccl6
ENSMUSG00000037989	0.182476	0.520123	0.0969898	0.194695	-2.5274	-1.33766	0.104522	0.999998	514	WNK lysine deficient protein kinase 2	75607	75607	Wnk2
ENSMUSG00000049149	1.03644	0.313786	0.741617	0.20685	3.08751	1.62644	0.20316	0.999998	515	olfactory receptor 1258	258980	258980	Olfr1258
ENSMUSG00000021927	0.902958	0.32174	0.539807	0.170337	2.64762	1.4047	0.135583	0.999998	516	predicted gene 5803	NA		Gm5803
ENSMUSG00000104114	0.325959	0.696966	0.319467	0.176394	-2.83862	-1.50519	0.178107	0.999998	517	predicted gene, 37297	NA		Gm37297
ENSMUSG00000109652	0.337201	0.655059	0.350478	0.195059	-2.90939	-1.54071	0.187879	0.999998	518	predicted gene 45555	NA		Gm45555
ENSMUSG00000059412	6.10739	11.5347	6.40434	7.44092	-3.48725	-1.80209	0.237944	0.999998	519	FXYD domain-containing ion transport regulator 2	11936	11936	Fxyd2
ENSMUSG00000087785	6.40924	24.8177	3.28722	21.0115	-2.72283	-1.44511	0.156765	0.999998	520	predicted gene, 23172	NA		Gm23172
ENSMUSG00000030701	0.568255	1.98807	0.312916	1.34492	-2.65938	-1.41109	0.143287	0.999998	521	pleckstrin homology domain containing, family B (evectins) member 1	27276	27276	Plekhb1
ENSMUSG00000103159	0.151071	0.457548	0.120422	0.161477	-2.69021	-1.42772	0.148411	0.999998	522	RIKEN cDNA F830112A20 gene	NA		F830112A20Rik
ENSMUSG00000077506	32.6108	91.0386	15.2522	33.8285	-2.43941	-1.28653	0.0784997	0.999998	523	small Cajal body-specific RNA 9	NA		Scarna9
ENSMUSG00000081524	1.30016	0.646278	0.549378	0.660197	2.8415	1.50665	0.183436	0.999998	524	predicted gene 11658	NA		Gm11658
ENSMUSG00000105167	4.50567	10.2036	4.41256	0.643454	-2.68613	-1.42553	0.148008	0.999998	525	small nucleolar RNA, C/D box 43	NA		Snord43
ENSMUSG00000111148	0.398563	0.168428	0.267399	0.291726	3.09735	1.63103	0.207978	0.999998	526		NA		AC242682.1
ENSMUSG00000081731	1.14185	0.369119	0.719247	0.441385	2.83179	1.50171	0.183544	0.999998	527	calreticulin, pseudogene	NA		Calr-ps
ENSMUSG00000086322	0.493641	0.239179	0.216329	0.245109	2.88685	1.5295	0.189832	0.999998	528	RIKEN cDNA E130218I03 gene	NA		E130218I03Rik
ENSMUSG00000105659	0.329902	0.897722	0.291011	0.176569	-2.80051	-1.48569	0.181576	0.999998	529	RIKEN cDNA 4930509H03 gene	NA		4930509H03Rik
ENSMUSG00000073902	10.8332	21.5272	12.0138	8.07574	-3.62472	-1.85787	0.252564	0.999998	530	predicted gene 1966	NA		Gm1966
ENSMUSG00000113061	0.758487	0.342791	0.368448	0.593731	3.24473	1.6981	0.227297	0.999998	531		NA		AL607105.1
ENSMUSG00000042265	1.66282	11.4529	0.991068	11.8253	-3.66307	-1.87305	0.254635	0.999998	532	triggering receptor expressed on myeloid cells 1	58217	58217	Trem1
ENSMUSG00000044176	0.171881	0.492268	0.297707	0.54564	-3.54352	-1.82518	0.247329	0.999998	533	serine peptidase inhibitor, Kazal type 10	328971	328971	Spink10
ENSMUSG00000081113	1.72862	0.56316	1.13407	0.48884	2.76506	1.46731	0.174939	0.999998	534	predicted pseudogene 7308	NA		Gm7308
ENSMUSG00000030162	0.301641	0.944161	0.200099	0.706404	-2.96547	-1.56826	0.202236	0.999998	535	oxidized low density lipoprotein (lectin-like) receptor 1	108078	108078	Olr1
ENSMUSG00000090327	4.50444	2.12166	1.49086	1.69254	2.73087	1.44936	0.165095	0.999998	536	predicted gene 17111	NA		Gm17111
ENSMUSG00000109783	0.106926	0.0343218	0.0446059	0.0410414	2.93771	1.55469	0.199058	0.999998	537	predicted gene 45338	NA		Gm45338
ENSMUSG00000034648	0.263249	0.0296391	0.340465	0.0282412	3.5401	1.82379	0.248586	0.999998	538	leucine rich repeat protein 1, neuronal	16979	16979	Lrrn1
ENSMUSG00000027748	0.11559	0.0690817	0.102271	0.119653	3.57181	1.83666	0.250604	0.999998	539	transient receptor potential cation channel, subfamily C, member 4	22066	22066	Trpc4
ENSMUSG00000020681	11.6997	1.98377	15.3459	1.64937	3.23052	1.69176	0.228857	0.999998	540	angiotensin I converting enzyme (peptidyl-dipeptidase A) 1	11421	11421	Ace
ENSMUSG00000051116	1.64979	0.219769	1.33593	0.209404	3.21359	1.68419	0.227446	0.999998	541	predicted pseudogene 8121	NA		Gm8121
ENSMUSG00000085787	2.48922	0.785086	2.31899	0.800717	3.20135	1.67868	0.22563	0.999998	542	predicted gene 13092	NA		Gm13092
ENSMUSG00000072769	0.314543	0.320814	0.544804	0.301111	-6.18421	-2.62859	0.298149	0.999998	543	predicted gene 10419	NA		Gm10419
ENSMUSG00000113864	0.0746448	0.316025	0.0226192	0.249695	-2.73472	-1.45139	0.16998	0.999998	544		NA		AC160340.1
ENSMUSG00000112744	0.151353	0.439215	0.185328	0.145339	-2.6944	-1.42996	0.161516	0.999998	545		NA		AC153366.2
ENSMUSG00000104938	0.119805	0.306438	0.207508	0.266449	-3.54878	-1.82732	0.253631	0.999998	546	predicted gene 42840	NA		Gm42840
ENSMUSG00000027855	0.643522	0	1.06856	0	4.42089	2.14434	0.284815	0.999998	547	synaptonemal complex protein 1	20957	20957	Sycp1
ENSMUSG00000094594	1.39684	0.517957	0.466271	0.587297	2.83676	1.50424	0.194741	0.999998	548	tumor protein D52, pseudogene	NA		Tpd52-ps
ENSMUSG00000083951	0.608091	1.77772	0.607391	0.976888	-2.70948	-1.43801	0.167633	0.999998	549	predicted gene 13786	NA		Gm13786
ENSMUSG00000106341	0.107941	0.44246	0.0291085	0.28641	-2.66185	-1.41243	0.15837	0.999998	550	predicted gene 43330	NA		Gm43330
ENSMUSG00000052485	3.98595	1.57396	2.66717	1.62042	2.82138	1.4964	0.192427	0.999998	551	transmembrane protein 171	380863	380863	Tmem171
ENSMUSG00000105033	0.466643	1.16424	0.361396	0.321961	-2.68636	-1.42565	0.1615	0.999998	552	predicted gene 43423	NA		Gm43423
ENSMUSG00000074547	0.765879	0.292521	0.393722	0.34979	2.70303	1.43458	0.167603	0.999998	553	ribosomal protein S8, pseudogene 4	NA		Rps8-ps4
ENSMUSG00000104735	0.113293	0.339646	0.122334	0.179508	-2.89397	-1.53305	0.203852	0.999998	554	RIKEN cDNA C130075A20 gene	NA		C130075A20Rik
ENSMUSG00000112640	0.482365	0.858659	0.468304	0.139766	-2.84307	-1.50745	0.198036	0.999998	555		102635315	102635315	AC172027.3
ENSMUSG00000090223	1.47543	4.95646	1.3172	3.77731	-3.2893	-1.71778	0.241462	0.999998	556	Purkinje cell protein 4	18546	18546	Pcp4
ENSMUSG00000103772	0.538896	0.994096	0.474174	0.215562	-2.99219	-1.5812	0.215731	0.999998	557	predicted gene, 36933	NA		Gm36933
ENSMUSG00000037166	3.42573	0.963252	2.62437	0.588144	2.8091	1.49011	0.196094	0.999998	558	protein phosphatase 1, regulatory (inhibitor) subunit 14A	68458	68458	Ppp1r14a
ENSMUSG00000086937	0.519583	0.167566	0.350128	0.146337	2.65387	1.4081	0.161311	0.999998	559	predicted gene 15063	NA		Gm15063
ENSMUSG00000104392	0.313825	0.869164	0.37635	0.472402	-2.69398	-1.42974	0.169621	0.999998	560	predicted gene, 37962	NA		Gm37962
ENSMUSG00000089827	1.11699	0.423382	0.478862	0.251208	2.59224	1.3742	0.15071	0.999998	561	RIKEN cDNA 1700023H06 gene	NA		1700023H06Rik
ENSMUSG00000055960	0.439408	0.100265	0.394855	0.0882337	3.44189	1.7832	0.254881	0.999998	562	selection and upkeep of intraepithelial T cells 4	320640	320640	Skint4
ENSMUSG00000021032	0.189086	0.673645	0.170653	0.567044	-2.78824	-1.47935	0.194074	0.999998	563	neuroglobin	64242	64242	Ngb
ENSMUSG00000093409	2.39825	7.29472	2.64241	2.91649	-2.59004	-1.37297	0.152261	0.999998	564	predicted gene, 25193	NA		Gm25193
ENSMUSG00000073018	0.239854	0.100448	0.14693	0.109512	2.73449	1.45127	0.184062	0.999998	565	predicted gene 1070	NA		Gm1070
ENSMUSG00000107824	0.899805	0.362859	0.423175	0.339781	2.73818	1.45322	0.185456	0.999998	566	predicted gene 6443	NA		Gm6443
ENSMUSG00000026018	0.58204	0.206232	0.32385	0.100693	2.61847	1.38873	0.158335	0.999998	567	islet cell autoantigen 1-like	70375	70375	Ica1l
ENSMUSG00000045573	0.867622	1.63096	1.01365	0.915581	-3.00217	-1.58601	0.221228	0.999998	568	preproenkephalin	18619	18619	Penk
ENSMUSG00000094685	6.40319	2.75005	2.31233	1.44825	2.68245	1.42355	0.170062	0.999998	569	predicted pseudogene 5900	NA		Gm5900
ENSMUSG00000044595	0.387222	1.05507	0.247749	0.324055	-2.41253	-1.27055	0.104614	0.999998	570	DND microRNA-mediated repression inhibitor 1	213236	213236	Dnd1
ENSMUSG00000102881	1.74289	0.721192	0.663623	0.252118	2.45131	1.29355	0.11789	0.999998	571	predicted gene 3807	NA		Gm3807
ENSMUSG00000033006	0.187233	2.30843	0.324298	3.64998	-6.5519	-2.71191	0.315193	0.999998	572	SRY (sex determining region Y)-box 10	20665	20665	Sox10
ENSMUSG00000104723	1.25886	0.425261	0.853619	0.482192	2.79613	1.48343	0.200395	0.999998	573	predicted gene 43106	NA		Gm43106
ENSMUSG00000081270	0.167626	0.596506	0.290337	0.182734	-3.20394	-1.67985	0.242287	0.999998	574	predicted gene 11653	NA		Gm11653
ENSMUSG00000015340	0.0465936	0.17313	0.0807024	0.123849	-3.58927	-1.84369	0.266951	0.999998	575	cytochrome b-245, beta polypeptide	13058	13058	Cybb
ENSMUSG00000047443	0.609182	0.21381	0.222739	0.0654987	2.55369	1.35258	0.149249	0.999998	576	erythroferrone	227358	227358	Erfe
ENSMUSG00000021750	0.148111	0	0.234194	0	3.33608	1.73815	0.253939	0.999998	577	family with sequence similarity 107, member A	268709	268709	Fam107a
ENSMUSG00000030043	0.132717	0.0535439	0.0484339	0.0682558	2.81913	1.49525	0.20516	0.999998	578	tachykinin receptor 1	21336	21336	Tacr1
ENSMUSG00000085448	3.93143	1.78942	0.142312	0.598168	2.34172	1.22757	0.0784069	0.999998	579	predicted gene 13963	NA		Gm13963
ENSMUSG00000105818	0.860712	1.33882	1.1346	0.462895	-2.91291	-1.54246	0.216596	0.999998	580	predicted gene 43256	NA		Gm43256
ENSMUSG00000090215	1.12813	0.233916	1.49423	0.350078	3.91353	1.96847	0.281933	0.999998	581	tripartite motif-containing 34B	434218	434218	Trim34b
ENSMUSG00000109674	0.238465	0.102766	0.18485	0.0772775	2.73609	1.45212	0.190436	0.999998	582	predicted gene 45470	NA		Gm45470
ENSMUSG00000090093	0.704319	1.80558	0.329229	0.44288	-2.39495	-1.26	0.102152	0.999998	583	predicted gene 14399	665001	665001	Gm14399
ENSMUSG00000106720	0.555237	1.23617	0.497238	0.243499	-2.58875	-1.37225	0.159174	0.999998	584	predicted gene 43795	NA		Gm43795
ENSMUSG00000008999	2.2989	15.6708	1.9104	22.3875	-3.37726	-1.75585	0.257519	0.999998	585	bone morphogenetic protein 7	12162	12162	Bmp7
ENSMUSG00000034917	0.139009	0.821475	0.156003	1.16465	-3.23283	-1.6928	0.248309	0.999998	586	tight junction protein 3	27375	27375	Tjp3
ENSMUSG00000026228	0.0949136	0.193147	0.164395	0.151905	-2.94116	-1.55639	0.22267	0.999998	587	5-hydroxytryptamine (serotonin) receptor 2B	15559	15559	Htr2b
ENSMUSG00000085589	0.1854	0.327841	0.26027	0.220398	-3.41364	-1.77131	0.260154	0.999998	588	RIKEN cDNA A430078I02 gene	NA		A430078I02Rik
ENSMUSG00000103693	0.10842	0.353351	0.0726656	0.253757	-2.68227	-1.42346	0.181398	0.999998	589	predicted gene, 37529	NA		Gm37529
ENSMUSG00000043333	2.69248	0.194959	4.1173	0.124736	4.13796	2.04892	0.29117	0.999998	590	rhomboid, veinlet-like 2 (Drosophila)	230726	230726	Rhbdl2
ENSMUSG00000098226	0.434869	0.207864	0.200899	0.212003	2.75428	1.46168	0.198181	0.999998	591	predicted gene 5272	NA		Gm5272
ENSMUSG00000079045	5.58963	10.1329	4.87334	6.18142	-3.30926	-1.72651	0.255807	0.999998	592	prospero homeobox 1, opposite strand	NA		Prox1os
ENSMUSG00000029819	363.264	659.476	336.069	487.224	-4.39055	-2.1344	0.298197	0.999998	593	neuropeptide Y	109648	109648	Npy
ENSMUSG00000104708	0.0547657	0.153662	0.0948569	0.0626389	-2.75228	-1.46063	0.198445	0.999998	594	predicted gene 42503	NA		Gm42503
ENSMUSG00000028459	0.200092	0.0556044	0.12409	0.0531951	2.77778	1.47393	0.204813	0.999998	595	CD72 antigen	12517	12517	Cd72
ENSMUSG00000072591	1.46777	3.49732	1.36096	1.33139	-2.64311	-1.40224	0.17704	0.999998	596	RIKEN cDNA 5930412G12 gene	NA		5930412G12Rik
ENSMUSG00000097294	0.279636	0.0803668	0.189052	0.0441629	2.54977	1.35037	0.15726	0.999998	597	predicted gene, 26888	NA		Gm26888
ENSMUSG00000107608	2.53335	1.07582	0.608221	0.4323	2.39057	1.25736	0.107096	0.999998	598	predicted gene, 43863	NA		Gm43863
ENSMUSG00000040264	0.780972	0.253451	0.401456	0.0432621	2.50162	1.32286	0.145283	0.999998	599	guanylate binding protein 2b	14468	14468	Gbp2b
ENSMUSG00000083649	0.888369	0.442203	0.377184	0.489698	2.81301	1.49212	0.213393	0.999998	600	RAS-like, family 2, locus 9	19428	19428	Rasl2-9
ENSMUSG00000097457	2.15678	0.962239	0.996378	0.622869	2.50494	1.32478	0.146425	0.999998	601	RIKEN cDNA 2310031A07 gene	NA		2310031A07Rik
ENSMUSG00000107706	0.143308	0.33175	0.248217	0.273016	-3.57422	-1.83763	0.273914	0.999998	602	predicted gene, 44022	NA		Gm44022
ENSMUSG00000103360	0.044903	0.183871	0.0777743	0.0767296	-2.64105	-1.40111	0.179326	0.999998	603	predicted gene, 38156	NA		Gm38156
ENSMUSG00000105834	0.645347	0.197901	0.426767	0.342775	2.87196	1.52204	0.223033	0.999998	604	RIKEN cDNA 4930592C13 gene	NA		4930592C13Rik
ENSMUSG00000065752	6.4463	11.8236	9.90106	8.01177	-2.87103	-1.52157	0.222729	0.999998	605	predicted gene, 23344	NA		Gm23344
ENSMUSG00000096768	22.631	11.0207	5.22224	1.20879	2.26326	1.1784	0.0508839	0.999998	606	erythroid differentiation regulator 1	170942	170942	Erdr1
ENSMUSG00000099931	0.155192	0.41727	0.142363	0.288121	-2.78313	-1.47671	0.209515	0.999998	607	predicted gene 29358	NA		Gm29358
ENSMUSG00000061517	0.121375	0.0344334	0.109772	0.0596404	3.30787	1.7259	0.261487	0.999998	608	SRY (sex determining region Y)-box 21	223227	223227	Sox21
ENSMUSG00000017639	0.220782	1.15776	0.318303	1.66948	-3.77456	-1.91631	0.28426	0.999998	609	RAB11 family interacting protein 4 (class II)	268451	268451	Rab11fip4
ENSMUSG00000102483	0.478773	0	0.773993	0	3.84755	1.94394	0.287372	0.999998	610	cation channel sperm associated auxiliary subunit epsilon	NA		Catspere
ENSMUSG00000048949	1.05829	0.474982	0.2576	0.198083	2.35432	1.23531	0.105429	0.999998	611	predicted pseudogene 6206	NA		Gm6206
ENSMUSG00000033510	0.174082	0.930009	0.127057	1.08714	-2.94265	-1.55712	0.234215	0.999998	612	OTU domain containing 7A	170711	170711	Otud7a
ENSMUSG00000104469	0.132322	0.4141	0.159196	0.0849242	-3.09742	-1.63107	0.246262	0.999998	613	predicted gene, 37663	NA		Gm37663
ENSMUSG00000097230	0.0926173	0.22933	0.0811605	0.0714009	-2.58385	-1.36952	0.170817	0.999998	614	predicted gene, 26853	NA		Gm26853
ENSMUSG00000058492	1.08368	0.502789	0.279709	0.398588	2.46409	1.30105	0.142353	0.999998	615	sterol carrier protein 2, pseudogene 2	NA		Scp2-ps2
ENSMUSG00000091730	0.106281	0.222404	0.123398	0.0793121	-2.60218	-1.37972	0.177848	0.999998	616	predicted gene 17230	NA		Gm17230
ENSMUSG00000082715	1.04631	0.337773	0.278826	0.294981	2.61685	1.38783	0.181153	0.999998	617	predicted gene 11633	NA		Gm11633
ENSMUSG00000038094	0.136425	0.054934	0.074737	0.0645191	3.00714	1.58839	0.240767	0.999998	618	ATPase type 13A4	224079	224079	Atp13a4
ENSMUSG00000108142	0.277015	0.801489	0.339198	0.376637	-2.74889	-1.45885	0.206529	0.999998	619	predicted gene 7498	NA		Gm7498
ENSMUSG00000030329	0.59582	0.177501	0.362801	0.153307	3.39034	1.76143	0.268554	0.999998	620	PILR alpha associated neural protein	319352	319352	Pianp
ENSMUSG00000040003	0.403253	0.211787	0.0844892	0.160157	2.49929	1.32152	0.153297	0.999998	621	membrane associated guanylate kinase, WW and PDZ domain containing 2	50791	50791	Magi2
ENSMUSG00000107155	2.70344	5.28718	2.29639	1.97556	-2.64372	-1.40257	0.187886	0.999998	622	predicted gene 43793	NA		Gm43793
[truncated: 18,425 more rows]

## Sheet: ALL genes Prog-Tg vs LA-Tg
Feature identifier	Mean expression level for the specified group	Mean expression level for the specified group	Standard deviation (of the expression) for the specified sample group	Standard deviation (of the expression) for the specified sample group	Expression ratio (fold change) between compared sample groups	Expression ratio (fold change) between the compared sample groups on the 2-logarithmic scale	T-test p value for the comparison between the sample groups	FDR adjusted p value for the comparison between the sample groups	Average ranking value based on both p value and fold change; value 1 is the strongest DE feature
[truncated: 19,048 more rows]
