# Supplementary material for: Endothelial and systemic upregulation of miR-34a-5p fine-tunes senescence in progeria
Source: Aging (Albany NY). 2022 Jan 12;14(1):195–224. doi: 10.18632/aging.203820 (PMC8791216; doi:10.18632/aging.203820)
Supplement: Supplementary Table 2 [file aging-14-203820-s003.xlsx]

## Sheet: Up miRNA ECs Prog-Tg vs WT
Upregulated miRNA in ECs Prog-Tg/WT
ID	FC	logFC	P.Value	adj.P.Val
mmu-miR-124-3p	5.73976	2.52099	0.00366184	0.428187
mmu-miR-692	6.29697	2.65466	0.00567625	0.428187
mmu-miR-669a-3-3p	5.0625	2.33985	0.00296665	0.428187
mmu-miR-133a-3p	5.07089	2.34224	0.00765238	0.428187
mmu-miR-7224-3p	4.95284	2.30826	0.00605689	0.428187
mmu-miR-206-3p	6.7115	2.74664	0.0182509	0.52696
mmu-miR-6950-3p	3.94279	1.97922	0.00281487	0.428187
mmu-miR-409-5p	4.49006	2.16673	0.00858333	0.428187
mmu-miR-185-3p	4.17144	2.06055	0.00892056	0.428187
mmu-miR-6921-3p	3.71375	1.89288	0.00440165	0.428187
mmu-miR-184-3p	3.96332	1.98671	0.011877	0.52696
mmu-miR-873a-5p	4.70365	2.23378	0.0189639	0.52696
mmu-miR-465c-5p	5.54264	2.47057	0.0266967	0.52696
mmu-miR-193b-5p	4.15556	2.05504	0.017196	0.52696
mmu-miR-470-5p	4.93042	2.30171	0.0255318	0.52696
mmu-miR-6399	3.58854	1.8434	0.00808289	0.428187
mmu-miR-6539	3.60288	1.84915	0.0150909	0.52696
mmu-miR-485-5p	3.5868	1.8427	0.0165788	0.52696
mmu-miR-6240	3.72418	1.89692	0.0201636	0.52696
mmu-miR-543-3p	4.1011	2.03601	0.0279934	0.52696
mmu-miR-127-5p	4.08386	2.02993	0.032555	0.52696
mmu-miR-487b-3p	3.65533	1.87	0.033648	0.52696
mmu-miR-1931	3.14004	1.65078	0.0217651	0.52696
mmu-miR-493-5p	3.72614	1.89768	0.0370978	0.52696
mmu-miR-7035-3p	3.94565	1.98026	0.0397399	0.52696
mmu-miR-147-3p	3.03142	1.6	0.0239181	0.52696
mmu-miR-31-5p	2.49681	1.32009	0.00849576	0.428187
mmu-miR-329-5p	3.59661	1.84664	0.0406182	0.52696
mmu-miR-7033-5p	3.19725	1.67683	0.0392764	0.52696
mmu-miR-7213-3p	2.75091	1.45991	0.0312924	0.52696
mmu-miR-3058-3p	2.79771	1.48425	0.0390888	0.52696
mmu-miR-147-5p	2.42061	1.27537	0.0369253	0.52696
mmu-miR-7090-5p	2.53459	1.34175	0.0441125	0.546426
mmu-miR-466f-5p	2.43189	1.28208	0.0391256	0.52696
mmu-miR-125b-1-3p	2.22016	1.15066	0.0188925	0.52696
mmu-miR-7048-3p	2.38918	1.25652	0.0404591	0.52696
mmu-miR-653-5p	2.2995	1.20132	0.0368275	0.52696
mmu-miR-34b-5p	2.20724	1.14224	0.030593	0.52696
mmu-miR-34c-5p	2.15471	1.10749	0.0221611	0.52696
mmu-miR-34a-5p	1.89915	0.925357	0.0496435	0.559349
mmu-miR-1983	1.67279	0.742253	0.0498961	0.559349

## Sheet: Down miRNA ECs Prog-Tg vs WT
Supplementary Table 2. Lists differentially expressed miRs in Prog-Tg/WT and LA-Tg/WT endothelial cells and plasma, associated with Figure 4A–4C.
Downregulated miRNA in ECs Prog-Tg/WT
ID	FC	logFC	P.Value	adj.P.Val
mmu-miR-190a-3p	-14.9137	-3.89857	0.000491833	0.377728
mmu-miR-6971-3p	-4.76662	-2.25297	0.00403217	0.428187
mmu-miR-150-5p	-4.92854	-2.30116	0.00835692	0.428187
mmu-miR-24-2-5p	-4.32686	-2.11332	0.00827233	0.428187
mmu-miR-6902-5p	-5.70686	-2.5127	0.02056	0.52696
mmu-miR-190a-5p	-6.65104	-2.73358	0.0344688	0.52696
mmu-miR-7054-5p	-3.52346	-1.81699	0.0137736	0.52696
mmu-miR-129-1-3p	-4.90649	-2.29469	0.03505	0.52696
mmu-miR-150-3p	-6.96624	-2.80038	0.0418549	0.52696
mmu-miR-212-5p	-2.96364	-1.56737	0.00883065	0.428187
mmu-miR-3064-3p	-3.00019	-1.58506	0.019066	0.52696
mmu-miR-6900-3p	-2.78205	-1.47615	0.0292163	0.52696
mmu-miR-3084-5p	-3.02627	-1.59754	0.0369754	0.52696
mmu-miR-132-3p	-2.94592	-1.55872	0.0395029	0.52696
mmu-miR-148a-3p	-2.60597	-1.38182	0.0354241	0.52696
mmu-miR-132-5p	-2.42386	-1.27731	0.0220117	0.52696
mmu-miR-30c-5p	-2.78763	-1.47904	0.0416269	0.52696
mmu-miR-138-1-3p	-2.28314	-1.19102	0.0175672	0.52696
mmu-miR-182-5p	-2.4207	-1.27542	0.0368663	0.52696
mmu-miR-7030-3p	-2.41019	-1.26915	0.0486429	0.559349
mmu-miR-181c-3p	-2.27346	-1.18489	0.0382188	0.52696
mmu-miR-7235-3p	-2.25488	-1.17305	0.0387159	0.52696
mmu-miR-26a-1-3p	-2.2581	-1.17511	0.0448625	0.546895
mmu-miR-192-5p	-2.08765	-1.06188	0.0315764	0.52696
mmu-miR-582-3p	-2.06286	-1.04465	0.037802	0.52696
mmu-miR-194-5p	-2.04637	-1.03307	0.0473627	0.559349
mmu-miR-10a-3p	-1.66311	-0.733888	0.0461609	0.55393

## Sheet: Up miRNA ECs LA-Tg vs WT
Upregulated miRNA in ECs La-Tg/WT
ID	FC	logFC	P.Value	adj.P.Val
mmu-miR-7224-3p	12.264	3.61636	0.00298126	0.989345
mmu-miR-6981-5p	6.49453	2.69922	0.0150388	0.989345
mmu-miR-466q	5.24575	2.39115	0.0197716	0.989345
mmu-miR-692	5.73185	2.519	0.0486893	0.989345
mmu-miR-5132-5p	4.01807	2.0065	0.0466015	0.989345
mmu-miR-7048-3p	3.4871	1.80203	0.0399031	0.989345

## Sheet: Down miRNA ECs  LA-Tg vs WT
Downregulated miRNA in ECs La-Tg/WT
ID	FC	logFC	P.Value	adj.P.Val
mmu-miR-466k	-4.70034	-2.23276	0.0316478	0.989345
mmu-miR-181c-5p	-2.16648	-1.11535	0.049684	0.989345

## Sheet: Up miRNA plasma Prog-Tg vs WT
Upregulated miRNA in plasma Prog-Tg-Tg/WT
ID	FC	logFC	P.Value	adj.P.Val
mmu-miR-148b-3p	1484.04	10.5353	7.93e-09	3.2e-06
mmu-miR-151-5p	497.346	8.95811	0.000187896	0.015182
mmu-miR-652-3p	358.635	8.48637	0.000439898	0.0253884
mmu-miR-28a-5p	367.559	8.52183	0.000633364	0.028431
mmu-miR-484	183.411	7.51894	0.000950824	0.0384133
mmu-miR-3535	173.659	7.44011	0.00330892	0.121528
mmu-miR-30e-3p	69.4529	6.11796	0.01077	0.241726
mmu-miR-30f	69.4529	6.11796	0.0107382	0.241726
mmu-miR-34a-5p	50.7764	5.66609	0.0156718	0.293391
mmu-miR-298-5p	14.7924	3.88678	0.0432551	0.379439
mmu-miR-532-5p	12.0601	3.59217	0.0413969	0.379439
mmu-miR-31-5p	12.2871	3.61907	0.0475921	0.379439
mmu-miR-26b-5p	2.45092	1.29332	0.0440286	0.379439

## Sheet: Down miRNA plasma Prog-Tg vs WT
Downregulated miRNA in plasma Prog-Tg-Tg/WT
ID	FC	logFC	P.Value	adj.P.Val
mmu-miR-451a	-689.036	-9.42844	0.000126445	0.0130341
mmu-miR-152-3p	-505.644	-8.98198	0.000239527	0.0161282
mmu-miR-24-1-5p	-264.504	-8.04714	0.00012905	0.0130341
mmu-miR-3074-1-3p	-264.504	-8.04714	0.00012905	0.0130341
mmu-miR-181a-2-3p	-282.75	-8.14339	0.000520047	0.0262624
mmu-miR-574-3p	-224.894	-7.8131	0.00563089	0.174991
mmu-miR-421-3p	-157.705	-7.30108	0.00529075	0.174991
mmu-miR-30a-3p	-78.5809	-6.29611	0.00748105	0.20149
mmu-miR-181a-5p	-32.4809	-5.02152	0.00908789	0.229469
mmu-miR-140-3p	-87.1738	-6.44582	0.0159856	0.293391
mmu-let-7d-5p	-23.1218	-4.53118	0.00616631	0.177942
mmu-miR-7663-3p	-21.9228	-4.45436	0.0150951	0.293391
mmu-miR-379-5p	-22.7363	-4.50693	0.0198014	0.333324
mmu-miR-23a-3p	-28.7235	-4.84416	0.035783	0.379439
mmu-miR-361-5p	-18.325	-4.19574	0.021138	0.34159
mmu-miR-7043-3p	-18.087	-4.17688	0.0167029	0.293391
mmu-miR-423-3p	-16.1155	-4.01037	0.014469	0.293391
mmu-miR-299b-5p	-18.2803	-4.19222	0.0338278	0.379439
mmu-miR-299a-3p	-18.2803	-4.19222	0.0338278	0.379439
mmu-miR-221-3p	-29.7474	-4.89469	0.0497649	0.379439
mmu-miR-490-3p	-15.5636	-3.9601	0.0287506	0.379439
mmu-miR-429-3p	-15.0064	-3.90751	0.0257994	0.379439
mmu-miR-1843a-5p	-18.2455	-4.18947	0.0409492	0.379439
mmu-miR-673-3p	-13.1403	-3.71592	0.0309545	0.379439
mmu-miR-136-3p	-14.6181	-3.86968	0.0375665	0.379439
mmu-miR-3071-5p	-14.6181	-3.86968	0.0375665	0.379439
mmu-miR-15b-5p	-13.428	-3.74717	0.0364001	0.379439
mmu-miR-135a-1-3p	-11.6819	-3.5462	0.0325177	0.379439
mmu-miR-322-3p	-15.176	-3.92372	0.0489392	0.379439
mmu-miR-6538	-12.5065	-3.64461	0.0484558	0.379439
mmu-miR-676-5p	-11.5981	-3.53582	0.0473376	0.379439
mmu-miR-1843b-3p	-11.2438	-3.49106	0.0421436	0.379439
mmu-miR-3065-5p	-10.1687	-3.34606	0.0378976	0.379439
mmu-miR-338-3p	-10.1687	-3.34606	0.0378976	0.379439
mmu-miR-486b-5p	-1.90441	-0.929341	0.0385648	0.379439
mmu-miR-486a-5p	-1.90421	-0.929191	0.0385509	0.379439
mmu-miR-486b-3p	-1.90421	-0.929191	0.0385509	0.379439
mmu-miR-486a-3p	-1.90441	-0.929341	0.0385648	0.379439

## Sheet: Up miRNA plasma LA-Tg vs WT
Upregulated miRNA in plasma La-Tg-Tg/WT
ID	FC	logFC	P.Value	adj.P.Val
mmu-miR-106b-3p	1009.77	9.9798	9.59e-05	0.0387383
mmu-miR-150-5p	411.138	8.68348	0.00175946	0.177705
mmu-miR-127-3p	249.743	7.9643	0.00951903	0.480711
mmu-miR-148b-3p	120.599	6.91408	0.0072135	0.480711
mmu-miR-484	132.911	7.05431	0.0177017	0.758827
mmu-miR-195a-5p	109.619	6.77636	0.0240298	0.758827
mmu-miR-541-5p	93.1134	6.54092	0.0234636	0.758827
mmu-miR-144-5p	86.1113	6.42813	0.00941562	0.480711
mmu-miR-181c-5p	130.946	7.03283	0.0365073	0.807942
mmu-miR-409-3p	89.1165	6.47762	0.0281743	0.758827
mmu-miR-151-5p	94.5632	6.56321	0.0474552	0.807942
mmu-miR-1941-5p	69.6825	6.12272	0.0479357	0.807942
mmu-let-7f-2-3p	22.2141	4.4734	0.046546	0.807942
mmu-miR-320-3p	3.71567	1.89362	0.0333808	0.807942
mmu-miR-30c-5p	3.05215	1.60983	0.0479966	0.807942
mmu-miR-26a-5p	1.71844	0.781103	0.0414476	0.807942

## Sheet: Down miRNA plasma La-Tg vs WT
Downregulated miRNA in plasma La-Tg-Tg/WT
ID	FC	logFC	P.Value	adj.P.Val
mmu-miR-24-1-5p	-153.401	-7.26116	0.00128843	0.173508
mmu-miR-3074-1-3p	-153.401	-7.26116	0.00128843	0.173508
mmu-miR-92b-3p	-132.427	-7.04905	0.0053218	0.430001
mmu-miR-328-3p	-90.5953	-6.50136	0.0216302	0.758827
mmu-miR-23b-3p	-90.3385	-6.49727	0.0347184	0.807942
mmu-miR-181a-2-3p	-56.4335	-5.81848	0.0271591	0.758827
mmu-miR-15a-5p	-46.8612	-5.55032	0.0279731	0.758827
mmu-miR-375-3p	-43.8644	-5.45498	0.0447062	0.807942

## Sheet: ALL miRs ECs Prog-Tg vs WT 
Feature identifier	Mean expression level for the specified group	Mean expression level for the specified group	Standard deviation (of the expression) for the specified sample group	Standard deviation (of the expression) for the specified sample group	Expression ratio (fold change) between compared sample groups	Expression ratio (fold change) between the compared sample groups on the 2-logarithmic scale	T-test p value for the comparison between the sample groups	FDR adjusted p value for the comparison between the sample groups	Average ranking value based on both p value and fold change; value 1 is the strongest DE feature
ID	mean_LaTr	mean_Pr	sd_LaTr	sd_Pr	FC	logFC	P.Value	adj.P.Val	avgRank
mmu-miR-190a-3p	0	0.667463	0	0.407608	-14.9137	-3.89857	0.000491833	0.377728	1
mmu-miR-124-3p	5.4234	0.941727	2.07759	0.864601	5.73976	2.52099	0.00366184	0.428187	2
mmu-miR-692	1.12048	0	1.05957	0	6.29697	2.65466	0.00567625	0.428187	3
mmu-miR-669a-3-3p	1.43785	0.168449	0.328572	0.291761	5.0625	2.33985	0.00296665	0.428187	4
mmu-miR-133a-3p	2.58925	0.607436	1.79132	1.05211	5.07089	2.34224	0.00765238	0.428187	5
mmu-miR-7224-3p	1.7476	0.141586	1.34199	0.135891	4.95284	2.30826	0.00605689	0.428187	6
mmu-miR-6971-3p	0.0787656	0.882696	0.0802031	1.02877	-4.76662	-2.25297	0.00403217	0.428187	7
mmu-miR-206-3p	88.9729	9.94224	93.4638	6.67004	6.7115	2.74664	0.0182509	0.52696	8
mmu-miR-150-5p	75.2439	776.835	5.71379	1064.71	-4.92854	-2.30116	0.00835692	0.428187	9
mmu-miR-6950-3p	0.843367	0.0854449	0.171102	0.147995	3.94279	1.97922	0.00281487	0.428187	10
mmu-miR-24-2-5p	1.03706	2.83201	1.20007	0.661706	-4.32686	-2.11332	0.00827233	0.428187	11
mmu-miR-409-5p	8.54632	1.66183	7.55219	1.91645	4.49006	2.16673	0.00858333	0.428187	12
mmu-miR-6902-5p	0.168349	1.11491	0.29159	0.981612	-5.70686	-2.5127	0.02056	0.52696	13
mmu-miR-185-3p	2.88799	0.604857	0.6502	0.526964	4.17144	2.06055	0.00892056	0.428187	14
mmu-miR-6921-3p	0.499777	0.0178658	0.230694	0.0309444	3.71375	1.89288	0.00440164	0.428187	15
mmu-miR-184-3p	3.51212	1.19871	1.92537	1.23691	3.96332	1.98671	0.011877	0.52696	16
mmu-miR-873a-5p	1.37353	0.117914	0.636903	0.204233	4.70365	2.23378	0.0189639	0.52696	17
mmu-miR-465c-5p	4.22517	0.556355	3.3502	0.566821	5.54264	2.47057	0.0266967	0.52696	18
mmu-miR-193b-5p	0.804572	0.0187165	0.701888	0.0324179	4.15556	2.05504	0.017196	0.52696	19
mmu-miR-190a-5p	48.6006	156.294	56.8301	76.6893	-6.65104	-2.73358	0.0344688	0.52696	20
mmu-miR-470-5p	2.09023	0.142926	1.98398	0.247555	4.93042	2.30171	0.0255318	0.52696	21
mmu-miR-6399	1.39192	0.248653	0.247577	0.22843	3.58854	1.8434	0.00808289	0.428187	22
mmu-miR-6539	2.97922	0.824341	0.434383	0.721353	3.60288	1.84915	0.0150909	0.52696	23
mmu-miR-7054-5p	0.147696	0.86044	0.145096	0.966694	-3.52346	-1.81699	0.0137736	0.52696	24
mmu-miR-129-1-3p	0.796521	8.4922	0.51591	12.2926	-4.90649	-2.29469	0.03505	0.52696	25
mmu-miR-485-5p	1.26167	0.242989	1.15097	0.236599	3.5868	1.8427	0.0165788	0.52696	26
mmu-miR-6240	18.434	3.68815	19.1609	1.29693	3.72418	1.89692	0.0201636	0.52696	27
mmu-miR-543-3p	2.60119	0.39679	3.03387	0.36483	4.1011	2.03601	0.0279934	0.52696	28
mmu-miR-150-3p	0.898057	4.19692	1.16404	5.33613	-6.96624	-2.80038	0.0418549	0.52696	29
mmu-miR-127-5p	6.98049	1.78553	6.94895	2.33041	4.08386	2.02993	0.032555	0.52696	30
mmu-miR-212-5p	3.79224	12.7483	0.311291	9.20254	-2.96364	-1.56737	0.00883065	0.428187	31
mmu-miR-487b-3p	1.84852	0.196523	2.59767	0.340388	3.65533	1.87	0.033648	0.52696	32
mmu-miR-1931	0.772816	0.071463	0.718889	0.123778	3.14004	1.65078	0.0217651	0.52696	33
mmu-miR-3064-3p	0.232325	0.705668	0.125829	0.307546	-3.00019	-1.58506	0.019066	0.52696	34
mmu-miR-493-5p	2.11974	0.410912	2.64828	0.711721	3.72614	1.89768	0.0370978	0.52696	35
mmu-miR-7035-3p	1.43502	0.0786093	1.79978	0.136155	3.94565	1.98026	0.0397399	0.52696	36
mmu-miR-147-3p	211.64	76.4212	100.531	47.7862	3.03142	1.6	0.0239181	0.52696	37
mmu-miR-31-5p	3759.94	1536.21	745.84	810.077	2.49681	1.32009	0.00849576	0.428187	38
mmu-miR-329-5p	15.3612	3.54894	18.5325	4.51603	3.59661	1.84664	0.0406182	0.52696	39
mmu-miR-483-5p	0.173049	2.52026	0.149932	3.82178	-5.73172	-2.51897	0.067142	0.574139	40
mmu-miR-6900-3p	0.849611	2.04614	0.874571	1.85902	-2.78205	-1.47615	0.0292163	0.52696	41
mmu-miR-181d-3p	0.431123	1.32886	0.39173	1.09682	-4.50773	-2.1724	0.0625107	0.574139	42
mmu-miR-3084-5p	1.15967	2.85622	0.969886	1.3441	-3.02627	-1.59754	0.0369754	0.52696	43
mmu-miR-7033-5p	0.819724	0.034178	1.03241	0.059198	3.19725	1.67683	0.0392764	0.52696	44
mmu-miR-7213-3p	2.36404	0.589643	1.98104	0.390566	2.75091	1.45991	0.0312924	0.52696	45
mmu-miR-6940-3p	1.03372	0.616566	0.155551	0.824383	3.79214	1.92301	0.0577141	0.568942	46
mmu-miR-132-3p	76.9196	255.033	30.8788	212.341	-2.94592	-1.55872	0.0395029	0.52696	47
mmu-miR-3058-3p	1.33716	0.439585	1.24979	0.445954	2.79771	1.48425	0.0390888	0.52696	48
mmu-miR-148a-3p	1416.13	2828	938.612	371.294	-2.60597	-1.38182	0.0354241	0.52696	49
mmu-miR-132-5p	14.0125	34.0819	4.76181	17.8429	-2.42386	-1.27731	0.0220117	0.52696	50
mmu-miR-30c-5p	3076.96	7563.62	2356.72	5359.11	-2.78763	-1.47904	0.0416269	0.52696	51
mmu-miR-300-5p	1.50693	0.178658	1.97043	0.309444	3.19007	1.67359	0.0555642	0.568942	52
mmu-miR-5615-3p	0.522145	1.20713	0.528245	1.28009	-3.42611	-1.77657	0.0643946	0.574139	53
mmu-miR-135a-5p	13.3743	5.43082	9.14741	6.01599	3.5687	1.8354	0.0704124	0.574139	54
mmu-miR-138-1-3p	9.25403	24.603	2.03882	21.0974	-2.28314	-1.19102	0.0175672	0.52696	55
mmu-miR-182-5p	88.4458	176.612	53.6603	38.1136	-2.4207	-1.27542	0.0368663	0.52696	56
mmu-miR-147-5p	53.3798	23.0469	20.4555	13.4696	2.42061	1.27537	0.0369253	0.52696	57
mmu-miR-7090-5p	0.553054	0.058957	0.259646	0.102116	2.53459	1.34175	0.0441125	0.546426	58
mmu-miR-466f-5p	3.87044	1.36696	0.801787	0.470187	2.43189	1.28208	0.0391256	0.52696	59
mmu-miR-125b-1-3p	362.592	165.464	76.6139	82.6195	2.22016	1.15066	0.0188925	0.52696	60
mmu-miR-205-5p	3.8892	0.919133	4.77417	0.93245	3.51859	1.815	0.0811426	0.574139	61
mmu-miR-7048-3p	0.50152	0.058957	0.326326	0.102116	2.38918	1.25652	0.0404591	0.52696	62
mmu-miR-653-5p	0.521673	0.0935825	0.338996	0.16209	2.2995	1.20132	0.0368275	0.52696	63
mmu-miR-7030-3p	0.214117	0.562893	0.06236	0.307279	-2.41019	-1.26915	0.0486429	0.559349	64
mmu-miR-382-3p	4.99693	1.23783	6.73374	1.90394	3.19774	1.67705	0.0844578	0.584356	65
mmu-miR-365-2-5p	13.9126	4.67974	14.7752	3.69705	2.40619	1.26675	0.0529348	0.559349	66
mmu-miR-181c-3p	8.57358	23.3004	1.67138	20.4766	-2.27346	-1.18489	0.0382188	0.52696	67
mmu-miR-212-3p	4.12043	8.73302	2.33942	3.0152	-2.5644	-1.35862	0.0711599	0.574139	68
mmu-miR-34b-5p	99.0935	37.3193	73.9176	18.0276	2.20724	1.14224	0.030593	0.52696	69
mmu-miR-7235-3p	1.96079	5.49879	1.2738	4.7434	-2.25488	-1.17305	0.0387159	0.52696	70
mmu-miR-183-3p	0.668629	1.29305	0.87512	0.951602	-2.62021	-1.38968	0.0755893	0.574139	71
mmu-miR-450a-2-3p	4.68142	2.54476	4.56529	3.58603	2.75563	1.46238	0.0787231	0.574139	72
mmu-miR-34c-5p	933.946	437.543	222.506	202.232	2.15471	1.10749	0.0221611	0.52696	73
mmu-miR-26a-1-3p	4.059	8.35657	0.474026	0.646065	-2.2581	-1.17511	0.0448625	0.546895	74
mmu-miR-196b-5p	0.314784	0.510203	0.274602	0.444401	-2.73291	-1.45044	0.0828394	0.57837	75
mmu-miR-465b-5p	2.6488	0.683104	1.87923	0.796512	3.05538	1.61135	0.101767	0.593091	76
mmu-miR-702-5p	0.433932	0.0413733	0.154089	0.0716607	2.30695	1.20599	0.0565297	0.568942	77
mmu-miR-1954	3.38477	5.37171	3.40635	3.61418	-2.31221	-1.20927	0.0577832	0.568942	78
mmu-miR-154-3p	0.160333	0.21122	0.277705	0.184019	-2.59981	-1.3784	0.0864092	0.587276	79
mmu-miR-137-3p	0.604157	0.0535973	0.704099	0.0928332	2.40359	1.26519	0.0714638	0.574139	80
mmu-miR-196a-5p	5.22107	1.63082	3.88142	1.42376	3.36971	1.75262	0.120497	0.598591	81
mmu-miR-192-5p	175.733	332.206	75.6268	125.679	-2.08765	-1.06188	0.0315764	0.52696	82
mmu-miR-381-3p	11.6177	3.29649	12.3433	1.75642	2.47415	1.30693	0.0888571	0.587604	83
mmu-miR-3097-3p	2.51418	0.903631	1.84625	0.281464	2.23398	1.15962	0.0577101	0.568942	84
mmu-miR-96-5p	28.8673	44.4698	24.9137	13.2819	-2.75904	-1.46417	0.105073	0.593091	85
mmu-miR-344d-3-5p	3.30211	1.30908	2.04976	0.915088	2.25346	1.17214	0.0599958	0.574139	86
mmu-miR-6481	0.392074	0.0178658	0.441393	0.0309444	2.35162	1.23365	0.0747179	0.574139	87
mmu-miR-675-3p	0.735706	6.63006	1.09132	10.1231	-3.87029	-1.95244	0.137625	0.598591	88
mmu-miR-124-5p	0.433264	0	0.616815	0	2.9435	1.55753	0.118384	0.598591	89
mmu-miR-486a-5p	2.64981	1.55007	1.62488	1.80867	2.1963	1.13508	0.0531673	0.559349	90
mmu-miR-134-5p	30.8026	9.89966	30.2954	7.53408	2.40802	1.26785	0.0901514	0.587604	91
mmu-miR-540-3p	2.07568	0.905028	1.43313	0.793652	2.61786	1.38839	0.107595	0.593091	92
mmu-miR-486b-5p	2.52936	1.47962	1.55102	1.72646	2.1963	1.13508	0.0531673	0.559349	93
mmu-miR-6963-3p	0.878988	0.389106	0.209305	0.290834	2.44452	1.28955	0.101022	0.593091	94
mmu-miR-582-3p	85.1946	166.19	22.1814	48.4544	-2.06286	-1.04465	0.037802	0.52696	95
mmu-miR-365-1-5p	0.365737	0.0471656	0.267228	0.0816932	2.2159	1.14789	0.0659623	0.574139	96
mmu-miR-582-5p	12.2015	19.1483	9.11972	2.15322	-2.4643	-1.30118	0.102463	0.593091	97
mmu-miR-466h-5p	12.7722	5.24134	3.16807	3.378	2.19833	1.13641	0.0609169	0.574139	98
mmu-miR-431-3p	1.06619	0.205882	0.923357	0.356597	2.51263	1.3292	0.105722	0.593091	99
mmu-miR-199a-3p	3481.94	7618.03	2088.32	5440.15	-2.19366	-1.13334	0.0640483	0.574139	100
mmu-miR-199b-3p	1660.84	3633.07	995.872	2595.33	-2.19514	-1.13431	0.0651961	0.574139	101
mmu-miR-1190	0.160333	0.438679	0.277705	0.535409	-2.89278	-1.53246	0.130262	0.598591	102
mmu-miR-465b-3p	6.22499	1.71262	4.30847	1.46552	2.75925	1.46428	0.129461	0.598591	103
mmu-miR-465c-3p	6.52142	1.79418	4.51364	1.53531	2.75925	1.46428	0.129461	0.598591	104
mmu-miR-101c	2.32693	2.43653	2.82153	2.46392	-3.33345	-1.73702	0.142168	0.598591	105
mmu-miR-6910-3p	0.358762	0.829034	0.427857	0.58095	-2.38292	-1.25273	0.102484	0.593091	106
mmu-miR-299a-3p	8.74348	2.39373	11.6161	3.03756	2.55379	1.35264	0.122211	0.598591	107
mmu-miR-675-5p	0.181791	2.27397	0.158713	3.76244	-3.70807	-1.89067	0.158898	0.615599	108
mmu-miR-194-5p	303.568	525.153	175.24	182.063	-2.04637	-1.03307	0.0473627	0.559349	109
mmu-miR-338-3p	156.338	385.665	133.431	377.1	-2.21568	-1.14775	0.0777426	0.574139	110
mmu-miR-142a-3p	3.21357	1.09887	2.19248	0.960798	2.31873	1.21333	0.101211	0.593091	111
mmu-miR-466f	1.29015	0.455653	0.267262	0.156729	2.18003	1.12435	0.0730232	0.574139	112
mmu-miR-1943-5p	5.45089	1.93254	5.06261	1.05834	2.1398	1.09747	0.0739156	0.574139	113
mmu-miR-374c-5p	0.369101	0.312727	0.595667	0.168603	-2.76274	-1.4661	0.146412	0.604539	114
mmu-miR-3061-5p	0.242561	0.984318	0.255994	1.30954	-2.27648	-1.18681	0.114072	0.598591	115
mmu-let-7c-1-3p	16.5168	40.7464	8.7989	30.8312	-2.17	-1.11769	0.0902828	0.587604	116
mmu-miR-148a-5p	3.31018	7.89922	1.96008	6.94922	-2.16237	-1.11261	0.0999135	0.593091	117
mmu-miR-16-1-3p	5.24043	8.14078	3.42514	2.36415	-2.12834	-1.08973	0.0890676	0.587604	118
mmu-miR-34a-5p	11156.7	5934.5	2752.02	3005.5	1.89915	0.925357	0.0496435	0.559349	119
mmu-miR-370-3p	1.17085	0.494829	1.02288	0.519151	2.24435	1.1663	0.117246	0.598591	120
mmu-miR-30b-5p	656.763	1100.18	431.802	400.536	-2.20795	-1.14271	0.113035	0.598591	121
mmu-miR-465a-3p	3.26071	0.897089	2.25682	0.767653	2.52346	1.3354	0.158326	0.615599	122
mmu-miR-667-3p	3.22807	1.05187	4.32241	0.994359	2.53502	1.34199	0.161831	0.615599	123
mmu-miR-344d-3p	493.15	216.684	400.961	151.991	2.05851	1.0416	0.0894491	0.587604	124
mmu-miR-5709-3p	0.22179	0	0.208381	0	2.33253	1.22189	0.140006	0.598591	125
mmu-miR-7018-3p	2.60337	0.935449	1.8923	0.382899	2.09538	1.06721	0.101816	0.593091	126
mmu-miR-135b-5p	0.356262	0.609952	0.383233	0.571513	-2.35563	-1.23611	0.142633	0.598591	127
mmu-miR-378d	0.275713	0	0.392518	0	2.30482	1.20465	0.139971	0.598591	128
mmu-miR-183-5p	59.2495	97.5021	32.9325	30.2275	-1.83995	-0.879666	0.0524885	0.559349	129
mmu-miR-6937-3p	0.406405	0.0178658	0.536975	0.0309444	2.16674	1.11552	0.114252	0.598591	130
mmu-miR-199a-5p	366.979	1166.44	277.875	1416.82	-2.25427	-1.17266	0.13547	0.598591	131
mmu-miR-3074-5p	0.883062	1.89505	0.442975	1.63864	-2.01397	-1.01004	0.0860317	0.587276	132
mmu-miR-32-5p	39.9205	56.2796	30.0934	8.00631	-2.15268	-1.10614	0.113073	0.598591	133
mmu-miR-3091-5p	0.58331	0.165887	0.113828	0.147734	2.08597	1.06072	0.104728	0.593091	134
mmu-miR-7219-3p	0.929422	1.36948	0.889626	0.676967	-2.32318	-1.2161	0.149704	0.614827	135
mmu-miR-7226-3p	0.299249	0.944673	0.246219	0.991107	-2.38833	-1.256	0.160142	0.615599	136
mmu-miR-138-5p	566.233	918.472	265.301	340.388	-1.82058	-0.8644	0.0514663	0.559349	137
mmu-miR-409-3p	29.1518	11.3368	25.4649	7.02961	2.23513	1.16036	0.139459	0.598591	138
mmu-miR-187-5p	0.296346	0.759703	0.383521	0.820956	-2.16949	-1.11735	0.123941	0.598591	139
mmu-miR-3062-5p	2.64567	1.87283	0.588424	2.01502	2.21644	1.14824	0.137306	0.598591	140
mmu-miR-34c-3p	62.3987	26.1458	49.6588	14.658	2.03774	1.02697	0.107224	0.593091	141
mmu-miR-1938	0.41042	0.074866	0.128622	0.129672	1.97598	0.982568	0.100687	0.593091	142
mmu-miR-7070-3p	5.02996	2.01206	3.84434	0.754405	2.02741	1.01964	0.108115	0.593091	143
mmu-miR-98-3p	6.92927	8.84989	5.94607	0.521625	-2.08977	-1.06334	0.125749	0.598591	144
mmu-miR-877-3p	11.0907	7.87648	4.85283	7.72795	1.79699	0.845581	0.0593585	0.574139	145
mmu-miR-676-5p	1.80939	3.82692	0.821255	2.80368	-1.88792	-0.916797	0.0805947	0.574139	146
mmu-miR-214-5p	5.25695	15.7805	1.69644	17.887	-2.08961	-1.06323	0.128087	0.598591	147
mmu-miR-7669-5p	0.988354	1.31171	0.818968	0.359611	-2.23106	-1.15773	0.157673	0.615599	148
mmu-miR-15a-3p	0.587167	1.89326	0.516151	2.29592	-3.16344	-1.66149	0.231691	0.6566	149
mmu-miR-19a-5p	1.08931	1.08738	0.944668	0.292302	-2.51582	-1.33103	0.203169	0.641443	150
mmu-miR-485-3p	4.82161	1.70404	5.36943	1.2317	2.26413	1.17896	0.174271	0.622103	151
mmu-miR-410-5p	0.406641	0.468889	0.704323	0.472677	-2.50031	-1.32211	0.210995	0.646384	152
mmu-miR-127-3p	148.116	59.2539	131.906	30.7514	2.03297	1.02359	0.12994	0.598591	153
mmu-miR-3072-3p	0.436614	0.017089	0.639876	0.029599	2.20635	1.14166	0.16141	0.615599	154
mmu-miR-375-3p	1.4366	0.449196	1.2503	0.77803	2.36891	1.24422	0.199775	0.641443	155
mmu-miR-10a-3p	171.598	270.315	11.0769	49.1614	-1.66311	-0.733888	0.0461609	0.55393	156
mmu-miR-1983	250.734	136.402	116.111	36.0893	1.67279	0.742253	0.0498961	0.559349	157
mmu-miR-382-5p	65.1044	22.739	70.4597	15.1983	2.07896	1.05586	0.140516	0.598591	158
mmu-miR-99a-5p	1072.03	2174.33	226.724	1549.74	-1.76428	-0.819076	0.0738363	0.574139	159
mmu-miR-1839-3p	2.53399	6.5451	1.1704	6.77458	-1.98149	-0.986587	0.127253	0.598591	160
mmu-miR-669o-5p	4.20347	2.11844	0.939476	1.07007	1.87705	0.908469	0.104887	0.593091	161
mmu-miR-495-3p	1.74274	0.734598	0.939309	0.713434	2.02067	1.01483	0.134166	0.598591	162
mmu-miR-141-3p	0.637025	0.651718	0.650145	0.369986	-2.33544	-1.22369	0.201345	0.641443	163
mmu-miR-452-5p	0.417117	0.768165	0.397775	1.06422	-2.30903	-1.20729	0.198643	0.641443	164
mmu-miR-1961	0.481608	0.103433	0.112563	0.179152	1.96337	0.97333	0.128712	0.598591	165
mmu-miR-300-3p	28.1575	8.0836	38.5744	9.17538	2.21648	1.14827	0.182233	0.63328	166
mmu-miR-16-5p	27226.8	42077	11231.6	8168.75	-1.72965	-0.790483	0.0704593	0.574139	167
mmu-miR-6964-3p	0.522455	1.12703	0.0606769	0.559261	-1.89275	-0.92048	0.115194	0.598591	168
mmu-miR-3066-3p	0.556775	1.06715	0.581492	0.822467	-2.04593	-1.03276	0.145189	0.602731	169
mmu-miR-6981-5p	0.170375	0	0.0839431	0	2.0286	1.02048	0.156482	0.615599	170
mmu-miR-1668	0.52544	1.52812	0.508519	1.7642	-2.06694	-1.0475	0.161915	0.615599	171
mmu-miR-935	1.75108	0.585809	1.36893	0.102688	2.02093	1.01502	0.154944	0.615599	172
mmu-miR-342-5p	18.7953	40.9478	9.11471	41.8766	-1.75162	-0.808692	0.0924038	0.593091	173
mmu-miR-665-3p	0.769176	0.687332	1.10139	0.371103	-2.38793	-1.25576	0.23091	0.6566	174
mmu-miR-505-5p	4.47694	9.25266	2.56202	9.14613	-1.77928	-0.831293	0.102028	0.593091	175
mmu-miR-341-3p	3.39243	1.18178	4.23771	1.17915	2.20927	1.14357	0.20121	0.641443	176
mmu-miR-350-5p	16.6755	9.43389	10.0972	4.5741	1.74778	0.805521	0.100037	0.593091	177
mmu-miR-672-3p	10.9672	6.16535	3.1763	1.30665	1.66547	0.735932	0.0755012	0.574139	178
mmu-miR-7080-3p	0.924059	1.86617	0.12943	0.968945	-2.02828	-1.02026	0.165397	0.621385	179
mmu-miR-378b	2.69734	5.07901	1.06114	3.71968	-1.74177	-0.800551	0.100558	0.593091	180
mmu-miR-6946-5p	0.443572	0.037433	0.553245	0.0648359	1.95084	0.964095	0.154242	0.615599	181
mmu-miR-221-3p	5038.27	3042.83	1439.54	938.251	1.60158	0.679494	0.0658066	0.574139	182
mmu-miR-296-3p	98.4196	59.5272	25.85	26.2321	1.62298	0.698647	0.0737446	0.574139	183
mmu-miR-338-5p	2.37781	4.72958	1.85283	4.03724	-1.82295	-0.866279	0.126305	0.598591	184
mmu-miR-455-5p	49.8718	28.8458	43.1865	32.6933	1.87766	0.908932	0.141303	0.598591	185
mmu-miR-299a-5p	21.1351	6.34444	25.7064	3.21439	2.01619	1.01163	0.174247	0.622103	186
mmu-miR-3065-5p	1.01033	1.58936	0.443833	0.767521	-1.82752	-0.869888	0.130943	0.598591	187
mmu-miR-129-2-3p	9.62786	2.79604	12.665	1.73815	2.25687	1.17433	0.240213	0.660855	188
mmu-miR-541-5p	74.0346	31.1295	68.2664	17.4401	1.88857	0.917296	0.151838	0.615599	189
mmu-miR-32-3p	2.04439	2.58686	1.48386	0.956819	-2.00976	-1.00702	0.178899	0.630251	190
mmu-miR-5106	0.196037	0.330593	0.220696	0.145743	-1.94905	-0.96277	0.171053	0.622103	191
mmu-miR-34b-3p	126.783	68.2373	88.2631	31.546	1.71102	0.774854	0.10602	0.593091	192
mmu-miR-15b-3p	57.0189	88.5344	25.079	29.5081	-1.70561	-0.77029	0.106948	0.593091	193
mmu-miR-298-5p	171.325	96.1814	88.842	35.1229	1.62811	0.703202	0.0963237	0.593091	194
mmu-miR-505-3p	11.2001	18.4699	2.83629	10.5631	-1.58454	-0.664069	0.0800545	0.574139	195
mmu-miR-6956-3p	1.22226	0.336897	1.50906	0.583523	2.17013	1.11778	0.230541	0.6566	196
mmu-miR-181a-1-3p	215.428	382.723	74.8712	304.628	-1.58017	-0.660083	0.07813	0.574139	197
mmu-miR-22-3p	2774.92	1678.12	933.941	620.949	1.57481	0.655175	0.0777103	0.574139	198
mmu-miR-664-5p	28.1686	11.5718	26.1815	4.38184	1.81078	0.856608	0.143718	0.599868	199
mmu-miR-15a-5p	212.575	298.7	140.041	91.6701	-1.87461	-0.906591	0.167261	0.621385	200
mmu-miR-10b-5p	18247.1	26531.5	4867.85	8949.55	-1.5174	-0.601599	0.0686267	0.574139	201
mmu-miR-1231-3p	1.10074	3.0984	0.564786	3.74036	-1.94757	-0.961675	0.192581	0.640268	202
mmu-miR-369-5p	11.2178	4.50459	9.63893	3.48511	1.96117	0.971712	0.201233	0.641443	203
mmu-miR-1198-3p	0.238395	0.520624	0.0835476	0.572103	-1.90898	-0.932801	0.190339	0.640262	204
mmu-miR-494-3p	17.7457	5.70805	20.6508	4.09484	2.01982	1.01422	0.212936	0.646384	205
mmu-miR-297b-5p	1.43541	1.28154	1.24376	0.607688	-2.3613	-1.23958	0.290438	0.667877	206
mmu-miR-92a-1-5p	62.1123	38.3066	1.15277	6.9318	1.53203	0.61544	0.0814859	0.574139	207
mmu-miR-5626-5p	0.150371	0	0.153115	0	1.97894	0.984727	0.20732	0.644263	208
mmu-miR-187-3p	14.5652	24.7166	10.3473	15.5033	-1.71691	-0.779818	0.136315	0.598591	209
mmu-miR-143-5p	17.3912	3.9679	27.709	4.89156	2.56464	1.35876	0.31633	0.678607	210
mmu-let-7a-2-3p	1.14935	0.582848	0.282415	0.593813	1.86467	0.898923	0.185263	0.635188	211
mmu-miR-23a-5p	7.92991	2.19743	9.10242	0.772312	2.00604	1.00435	0.222656	0.6566	212
mmu-miR-7091-3p	0.387908	0.514346	0.363955	0.0455865	-2.01593	-1.01144	0.223835	0.6566	213
mmu-miR-1969	3.54614	1.80777	1.08365	1.15685	1.8238	0.86695	0.17562	0.622103	214
mmu-miR-6236	0.467505	0.0512669	0.575129	0.088797	1.92451	0.944494	0.203792	0.641443	215
mmu-miR-7677-3p	0.412323	0	0.362984	0	2.1412	1.09842	0.25544	0.660855	216
mmu-miR-99b-3p	183.565	96.4388	116.587	32.1054	1.63912	0.712925	0.131424	0.598591	217
mmu-miR-24-1-5p	0.218528	0.524202	0.0765853	0.379266	-1.89781	-0.924333	0.208043	0.644263	218
mmu-miR-146a-5p	17156	10306.5	6484.95	6848.7	1.91989	0.94102	0.214595	0.648853	219
mmu-miR-10b-3p	534.457	760.271	169.597	62.6531	-1.58342	-0.66304	0.117778	0.598591	220
mmu-miR-431-5p	52.7404	20.6873	54.724	12.0519	1.89397	0.921414	0.211407	0.646384	221
mmu-miR-10a-5p	8102.45	11455.8	2751.58	4551.79	-1.46782	-0.553671	0.0750435	0.574139	222
mmu-miR-214-3p	83.1673	356.096	38.9805	513.936	-1.9431	-0.958359	0.226565	0.6566	223
mmu-miR-5134-5p	0.0862721	0.131016	0.0780339	0.226926	-1.77108	-0.824627	0.174554	0.622103	224
mmu-miR-326-3p	20.806	42.6462	6.46849	39.6366	-1.6177	-0.69394	0.13107	0.598591	225
mmu-miR-3099-3p	0.908633	1.1688	0.736621	0.511416	-1.81084	-0.856659	0.190911	0.640262	226
mmu-miR-879-3p	1.83688	2.18789	1.4445	0.484027	-1.74922	-0.806711	0.175777	0.622103	227
mmu-miR-33-3p	1.871	2.81687	1.45092	2.08067	-2.11227	-1.07879	0.274642	0.667877	228
mmu-miR-3473d	0.570472	0.285852	0.301707	0.49511	1.79122	0.840946	0.193584	0.640831	229
mmu-miR-421-5p	0.497636	0.544982	0.682267	0.290501	-1.87992	-0.910674	0.226372	0.6566	230
mmu-miR-329-3p	2.81171	1.33065	3.5423	1.29566	2.06453	1.04581	0.268388	0.667877	231
mmu-miR-6546-3p	0.621501	0.148022	0.457061	0.142068	1.83822	0.878308	0.212867	0.646384	232
mmu-miR-195a-3p	15.8254	8.72015	7.48959	6.26187	1.68242	0.750538	0.165693	0.621385	233
mmu-miR-6958-3p	1.67107	0.667747	0.966168	0.175542	1.81192	0.857516	0.206378	0.644263	234
mmu-miR-193b-3p	1.21139	0.506823	0.831749	0.138428	1.83033	0.872102	0.217544	0.655192	235
mmu-miR-181b-2-3p	1.70183	1.43189	2.2672	1.77825	-2.20288	-1.13939	0.302251	0.667877	236
mmu-miR-3103-3p	0.304242	0.581171	0.0970111	0.346139	-1.73639	-0.796088	0.186261	0.635771	237
mmu-miR-181c-5p	25.0425	38.8875	6.41881	22.1465	-1.50041	-0.585361	0.11646	0.598591	238
mmu-miR-192-3p	1.06272	1.9203	0.826244	1.45487	-1.71662	-0.779572	0.187699	0.637843	239
mmu-miR-411-3p	3.00331	0.89979	3.69392	0.386984	1.94853	0.962384	0.257265	0.660855	240
mmu-miR-30d-3p	16.8581	24.1794	8.52449	7.46475	-1.67766	-0.746451	0.180257	0.632134	241
mmu-miR-3087-3p	0.545134	0.165887	0.214402	0.147734	1.79927	0.847415	0.222043	0.6566	242
mmu-miR-669h-5p	1.02308	0.403723	0.559941	0.349842	1.74044	0.799454	0.198589	0.641443	243
mmu-miR-3970	10.2173	15.9252	10.799	12.2994	-1.92681	-0.946217	0.255474	0.660855	244
mmu-miR-467e-5p	67.4805	39.0911	38.4878	21.9773	1.63658	0.710684	0.171646	0.622103	245
mmu-miR-330-5p	14.8438	8.87855	1.60027	3.51653	1.5973	0.675631	0.158938	0.615599	246
mmu-miR-27a-5p	447.949	127.573	571.206	16.2356	1.86201	0.896863	0.251858	0.660855	247
mmu-miR-1934-3p	0.784473	0.276995	0.953805	0.220326	1.82255	0.865962	0.232851	0.657462	248
mmu-miR-193a-3p	1.13945	0.56403	0.477121	0.562775	1.82853	0.870685	0.243005	0.660855	249
mmu-miR-34a-3p	12.374	6.87604	5.8104	3.13666	1.57891	0.658926	0.158431	0.615599	250
mmu-miR-3081-3p	1.34886	0.791189	1.08729	1.13394	1.78004	0.831913	0.227526	0.6566	251
mmu-miR-222-3p	660.522	435.543	215.636	157.306	1.48554	0.570984	0.125531	0.598591	252
mmu-miR-5123	13.7019	8.32535	1.47523	0.0975834	1.51742	0.601617	0.138488	0.598591	253
mmu-miR-7008-3p	0.125009	0.239246	0.140734	0.414386	-1.84173	-0.881061	0.251863	0.660855	254
mmu-miR-3094-5p	0.69283	0.330593	0.118859	0.145743	1.65125	0.723556	0.198424	0.641443	255
mmu-miR-497a-5p	518.421	327.073	240.967	94.7769	1.4456	0.531673	0.110861	0.598591	256
mmu-miR-7060-3p	0.298082	0.165887	0.430962	0.147734	-1.93415	-0.951697	0.283469	0.667877	257
mmu-miR-340-5p	177.253	202.223	134.307	44.2241	-1.80514	-0.852107	0.249927	0.660855	258
mmu-miR-125b-5p	71981.3	48707.7	39414	28031.5	1.4583	0.54429	0.121466	0.598591	259
mmu-miR-339-5p	207.117	424.011	137.262	486.54	-1.56542	-0.646546	0.167316	0.621385	260
mmu-miR-5108	0.406405	0.0357315	0.536975	0.0618888	1.81686	0.861449	0.253198	0.660855	261
mmu-miR-496a-3p	3.24241	1.0134	3.92163	0.743038	1.94799	0.961984	0.297022	0.667877	262
mmu-miR-99a-3p	10.3695	14.1806	5.27093	4.01812	-1.53348	-0.616813	0.167483	0.621385	263
mmu-miR-1930-5p	0.585127	0.254034	0.261218	0.247353	1.78059	0.832356	0.253759	0.660855	264
mmu-miR-18a-3p	15.0434	11.0407	10.761	10.1362	1.5663	0.647357	0.181932	0.63328	265
mmu-miR-3102-5p.2-5p	0.241069	0.289765	0.23043	0.257894	-1.93022	-0.948769	0.296803	0.667877	266
mmu-miR-7036b-5p	0.670168	0.107408	0.71822	0.143938	1.90001	0.92601	0.291522	0.667877	267
mmu-miR-497a-3p	3.37846	1.52968	5.00225	0.778745	-2.13875	-1.09677	0.373214	0.752617	268
mmu-miR-376a-5p	0.6802	0.39696	1.17814	0.358399	-2.04763	-1.03396	0.336442	0.705977	269
mmu-miR-145a-3p	7.81322	3.08244	11.2591	2.91255	2.12623	1.0883	0.371251	0.752297	270
mmu-miR-92b-3p	6.69337	4.36422	4.4583	2.86913	1.59317	0.671903	0.197031	0.641443	271
mmu-miR-28a-3p	499.004	292.038	334.799	107.384	1.48827	0.573632	0.151961	0.615599	272
mmu-miR-5100	19.2409	12.4065	13.9084	9.5583	1.52756	0.611234	0.172142	0.622103	273
mmu-miR-138-2-3p	1.57745	1.13324	1.53518	1.50117	1.85164	0.8888	0.286874	0.667877	274
mmu-miR-411-5p	67.8027	22.3785	86.1316	19.8466	1.84358	0.882507	0.288184	0.667877	275
mmu-miR-1929-5p	0.505437	0.112299	0.339935	0.194508	1.78813	0.838455	0.266127	0.667877	276
mmu-miR-5619-5p	0.395931	0.567943	0.151333	0.0745356	-1.6299	-0.704781	0.223451	0.6566	277
mmu-miR-101a-5p	0.880418	1.09779	1.03025	0.766483	-1.95245	-0.965287	0.312415	0.672085	278
mmu-miR-365-3p	1742.69	1347.53	653.219	997.37	1.41248	0.498229	0.119302	0.598591	279
mmu-miR-379-5p	108.645	43.4406	131.175	39.7901	1.76618	0.820636	0.26322	0.664976	280
mmu-let-7f-2-3p	7.58986	9.13414	5.4695	1.61615	-1.74468	-0.802962	0.255587	0.660855	281
mmu-miR-378c	21.7911	31.0452	11.9718	18.0595	-1.47622	-0.561908	0.171606	0.622103	282
mmu-miR-669c-5p	202.781	111.46	118.342	13.7254	1.5619	0.643306	0.211657	0.646384	283
mmu-miR-30a-3p	767.032	1033.66	129.755	141.203	-1.43089	-0.516911	0.142017	0.598591	284
mmu-miR-143-3p	1361.91	531.39	1959.79	484.833	1.99569	0.996891	0.381216	0.766423	285
mmu-miR-672-5p	426.309	234.793	288.117	136.406	1.5992	0.677348	0.230859	0.6566	286
mmu-miR-669m-5p	22.8683	12.5225	11.1425	3.25782	1.50076	0.585689	0.188965	0.639317	287
mmu-miR-22-5p	148.188	91.9977	73.5489	37.8155	1.48798	0.573358	0.184833	0.635188	288
mmu-miR-146b-5p	64.9706	41.6135	20.8165	7.80336	1.44541	0.531479	0.159232	0.615599	289
mmu-miR-504-5p	3.93759	24.0192	1.35403	37.0126	-1.76644	-0.820842	0.295757	0.667877	290
mmu-miR-463-5p	0.631975	0.201619	0.282238	0.175655	1.71464	0.777903	0.28022	0.667877	291
mmu-miR-6946-3p	0.923114	1.05115	1.17458	0.916131	-1.70141	-0.766735	0.274954	0.667877	292
mmu-miR-6944-3p	18.8797	13.52	9.19326	9.83684	1.46899	0.554823	0.192447	0.640268	293
mmu-miR-30e-3p	187.776	258.56	9.21351	101.571	-1.38176	-0.46651	0.138487	0.598591	294
mmu-miR-145a-5p	108.195	68.8166	148.525	76.6646	2.10248	1.07209	0.452044	0.805498	295
mmu-miR-210-5p	1.21795	1.02514	0.598264	1.25193	1.68415	0.752025	0.283118	0.667877	296
mmu-miR-337-5p	7.38479	3.10192	7.21085	2.86983	1.75755	0.813567	0.300255	0.667877	297
mmu-miR-101a-3p	827.847	826.594	836.453	283.662	-1.64772	-0.720475	0.2718	0.667877	298
mmu-miR-7213-5p	6.3796	2.92013	6.48994	1.37496	1.70128	0.766621	0.289244	0.667877	299
mmu-miR-340-3p	9.49174	12.1843	3.0807	2.82796	-1.45677	-0.542772	0.195614	0.641443	300
mmu-miR-1941-5p	0.231195	0.197727	0.400441	0.299175	-1.8433	-0.882294	0.373369	0.752617	301
mmu-miR-484	111.387	77.4179	42.9148	37.0179	1.41336	0.499131	0.170665	0.622103	302
mmu-miR-434-3p	40.9962	18.0253	41.5564	9.2391	1.76277	0.817848	0.311265	0.671839	303
mmu-miR-6935-3p	0.167376	0.33687	0.179599	0.451443	-1.7349	-0.79485	0.301391	0.667877	304
mmu-miR-92b-5p	1.11908	0.845263	1.03819	1.06309	1.6377	0.711669	0.28535	0.667877	305
mmu-miR-145b	0.235396	0.0178658	0.291294	0.0309444	1.67033	0.740131	0.296441	0.667877	306
mmu-miR-666-3p	1.2086	0.149732	1.96326	0.259343	1.75898	0.814739	0.319364	0.68131	307
mmu-miR-3474	0.236311	0.034178	0.213745	0.059198	1.58489	0.664386	0.267698	0.667877	308
mmu-miR-500-5p	1.34533	1.00552	0.57423	1.15444	1.73512	0.795035	0.309877	0.671839	309
mmu-miR-872-3p	66.2053	94.7795	29.1212	51.6474	-1.4975	-0.582557	0.231031	0.6566	310
mmu-miR-8114	12.5605	9.71335	10.2386	9.21434	1.51188	0.59634	0.249043	0.660855	311
mmu-miR-669e-5p	0.947868	0.527776	0.324355	0.478956	1.61779	0.694026	0.28848	0.667877	312
mmu-miR-6989-3p	5.5705	8.23784	3.75687	6.62217	-1.52354	-0.607426	0.254583	0.660855	313
mmu-miR-23b-5p	24.9241	15.6729	13.1987	6.04339	1.43162	0.517645	0.203096	0.641443	314
mmu-miR-874-5p	5.51899	9.61203	2.17715	8.17653	-1.46113	-0.547081	0.22953	0.6566	315
mmu-miR-7031-5p	0.339485	0.0187165	0.498312	0.0324179	1.68378	0.751703	0.310807	0.671839	316
mmu-miR-3089-3p	0.699238	0.277167	0.493267	0.246681	1.71966	0.782122	0.330685	0.69771	317
mmu-miR-7a-1-3p	13.3964	16.8188	6.86876	4.01887	-1.50322	-0.588052	0.252307	0.660855	318
mmu-miR-130a-5p	2.19584	4.14017	0.59212	2.77465	-1.60312	-0.680884	0.296502	0.667877	319
mmu-miR-671-5p	66.9316	48.3339	9.66922	35.7017	1.47698	0.562647	0.243427	0.660855	320
mmu-miR-467c-5p	49.6883	34.085	4.22977	4.42997	1.3858	0.470715	0.184236	0.635188	321
mmu-miR-760-3p	1.47194	0.891076	1.63734	1.00246	1.61613	0.692539	0.3013	0.667877	322
mmu-miR-491-3p	0.451652	0.802492	0.410383	1.11104	-1.86173	-0.896643	0.434919	0.78964	323
mmu-miR-7652-3p	0.513137	0.324691	0.242391	0.562381	1.60742	0.684748	0.302632	0.667877	324
mmu-miR-8103	3.48438	7.78821	3.36915	9.28377	-1.58037	-0.66026	0.300058	0.667877	325
mmu-miR-6939-3p	0.650183	0.900174	0.442897	1.46297	1.63738	0.711391	0.332066	0.698704	326
mmu-miR-154-5p	16.879	5.07057	23.3351	3.8707	1.73725	0.796804	0.39535	0.774698	327
mmu-miR-5113	2.02533	1.14474	0.322923	0.837962	1.51175	0.596222	0.280234	0.667877	328
mmu-miR-669b-5p	12.4736	6.83045	6.07774	1.77699	1.44376	0.529827	0.248201	0.660855	329
mmu-miR-6988-3p	4.79776	6.89148	3.71588	5.54213	-1.46016	-0.546127	0.254799	0.660855	330
mmu-miR-106b-5p	55.5551	57.5401	41.7959	13.9806	-1.63066	-0.705457	0.346732	0.717764	331
mmu-miR-299b-5p	0.66801	0.307631	0.616324	0.268412	1.62918	0.704147	0.343645	0.715229	332
mmu-miR-26a-2-3p	16.2015	22.6753	2.48233	8.17788	-1.41268	-0.498431	0.229535	0.6566	333
mmu-miR-125b-2-3p	80.7889	108.55	35.4636	46.47	-1.43749	-0.523554	0.251465	0.660855	334
mmu-miR-6996-3p	0.53293	0.548895	0.6114	0.383241	-1.61998	-0.695973	0.356492	0.732048	335
mmu-miR-344b-3p	6.79973	4.35069	2.4588	4.20261	1.50504	0.589802	0.289452	0.667877	336
mmu-miR-100-5p	277.789	215.476	68.0222	114.779	1.36983	0.453998	0.205295	0.643536	337
mmu-miR-770-3p	0.630465	0.457396	0.310111	0.528059	1.55653	0.638333	0.309749	0.671839	338
mmu-miR-412-5p	1.068	0.336897	1.13004	0.583523	1.74222	0.800924	0.420392	0.777978	339
mmu-miR-376b-5p	3.70508	1.48811	5.31508	0.988102	-1.86082	-0.895937	0.48704	0.818041	340
mmu-miR-7655-3p	0.315072	0.071463	0.275431	0.123778	1.53534	0.618556	0.317624	0.679485	341
mmu-miR-218-1-3p	0.723531	1.15745	0.502889	1.20596	-1.58398	-0.663551	0.365826	0.745238	342
mmu-miR-181b-5p	2221.57	979.607	2317.51	115.464	1.5286	0.612214	0.311425	0.671839	343
mmu-miR-3079-5p	1.98063	1.07838	0.352239	0.558914	1.49289	0.578103	0.301233	0.667877	344
mmu-miR-130b-5p	35.7558	61.92	21.447	61.4803	-1.432	-0.518032	0.26677	0.667877	345
mmu-miR-7075-3p	1.9233	3.49419	1.04572	3.35654	-1.45611	-0.54212	0.285573	0.667877	346
mmu-miR-301a-5p	8.10951	9.19847	4.66236	3.44207	-1.5038	-0.588616	0.309923	0.671839	347
mmu-miR-6911-3p	1.82607	2.50949	0.559118	1.25315	-1.41848	-0.504347	0.257286	0.660855	348
mmu-miR-3066-5p	4.04938	4.95188	1.77483	0.867879	-1.42258	-0.508508	0.262147	0.664452	349
mmu-miR-151-3p	294.506	178.387	247.306	107.795	1.42539	0.511352	0.273187	0.667877	350
mmu-miR-28a-5p	53.6494	37.7846	7.49732	0.499544	1.33911	0.42128	0.223421	0.6566	351
mmu-miR-501-5p	12.4299	8.97825	4.95747	4.99853	1.36976	0.453923	0.24816	0.660855	352
mmu-miR-100-3p	0.806277	0.341552	0.58701	0.398256	1.56097	0.642445	0.392815	0.774698	353
mmu-miR-29b-1-5p	41.5364	28.7015	7.8124	7.37808	1.37856	0.463163	0.25326	0.660855	354
mmu-miR-350-3p	154.871	96.7332	99.2209	23.9683	1.35666	0.44006	0.237433	0.660855	355
mmu-let-7a-1-3p	71.4274	82.0266	43.8422	3.02675	-1.46023	-0.546193	0.302082	0.667877	356
mmu-miR-210-3p	132.406	91.3821	60.2149	31.477	1.38968	0.474756	0.258884	0.661072	357
mmu-let-7c-2-3p	68.1637	78.2854	41.8268	2.98075	-1.45993	-0.545897	0.302413	0.667877	358
mmu-miR-92a-3p	1490.5	1127.75	838.726	741.638	1.3323	0.41392	0.22898	0.6566	359
mmu-miR-140-5p	79.7583	98.6478	31.8014	27.5266	-1.37103	-0.455264	0.25552	0.660855	360
mmu-miR-222-5p	28.8031	19.5364	7.91893	2.25335	1.35571	0.439048	0.251128	0.660855	361
mmu-miR-7026-5p	0.424502	0.923339	0.323157	1.16167	-1.53147	-0.614914	0.397145	0.775304	362
mmu-miR-107-5p	0.713691	1.32001	0.439958	1.42601	-1.55558	-0.637455	0.408996	0.777978	363
mmu-miR-25-5p	18.901	14.6101	12.7148	12.606	1.38403	0.468873	0.270583	0.667877	364
mmu-miR-467d-5p	26.6345	21.6326	5.89374	14.2225	1.34573	0.428393	0.250264	0.660855	365
mmu-miR-6981-3p	0.3816	0.548895	0.244976	0.383241	-1.47206	-0.557841	0.345856	0.717764	366
mmu-miR-434-5p	32.9526	12.5164	41.6531	9.11044	1.54398	0.626658	0.412969	0.777978	367
mmu-miR-122-5p	28.6346	19.9401	11.7827	8.54521	1.36485	0.448741	0.259092	0.661072	368
mmu-miR-7118-3p	0.962688	0.867874	0.829464	1.13537	1.48681	0.572221	0.388098	0.774643	369
mmu-miR-126a-3p	238272	293324	52912.5	17649.4	-1.31932	-0.399789	0.235768	0.660855	370
mmu-miR-410-3p	0.785229	0.0535973	1.13904	0.0928332	1.64463	0.717761	0.486835	0.818041	371
mmu-let-7d-5p	4524.28	3033.79	1807.44	515.862	1.34977	0.432718	0.261378	0.664452	372
mmu-miR-1947-5p	0.336019	0.478589	0.0804309	0.432725	-1.48933	-0.574668	0.402856	0.777369	373
mmu-miR-195a-5p	676.023	492.676	183.454	256.575	1.3779	0.462468	0.294381	0.667877	374
mmu-miR-7046-3p	0.287666	0.456674	0.292916	0.427167	-1.49604	-0.581146	0.412988	0.777978	375
mmu-miR-652-5p	4.12515	4.41691	3.28415	1.71986	-1.47474	-0.560464	0.399335	0.775304	376
mmu-miR-6943-3p	0.231195	0.0683559	0.400441	0.118396	-1.59655	-0.674959	0.485387	0.818041	377
mmu-miR-3098-3p	0.375069	0.619176	0.447305	0.770706	-1.4944	-0.579567	0.416923	0.777978	378
mmu-miR-181d-5p	65.894	83.097	9.61952	26.2608	-1.29577	-0.373809	0.240273	0.660855	379
mmu-miR-669f-5p	1.74975	1.07054	0.579703	0.518013	1.45189	0.537933	0.392299	0.774698	380
mmu-miR-376c-3p	10.303	2.85267	14.4431	3.17649	1.60082	0.678815	0.496329	0.825603	381
mmu-miR-455-3p	80.0578	49.8637	55.8092	26.5651	1.3919	0.47706	0.307224	0.671839	382
mmu-miR-6996-5p	0.431447	0.538489	0.329939	0.568627	-1.46218	-0.548116	0.407628	0.777978	383
mmu-miR-223-5p	0.278388	0.330593	0.290746	0.145743	-1.52048	-0.604529	0.445643	0.799658	384
mmu-miR-193a-5p	46.3367	29.8035	29.4694	8.83637	1.35326	0.436443	0.288201	0.667877	385
mmu-miR-7029-3p	0.290902	0.408333	0.262515	0.425879	-1.54009	-0.623018	0.467339	0.811969	386
mmu-miR-501-3p	98.493	65.9034	72.8948	41.4915	1.36753	0.45157	0.299027	0.667877	387
mmu-miR-224-5p	347.248	263.69	142.312	214.205	1.43301	0.519048	0.388815	0.774643	388
mmu-let-7b-3p	30.5255	62.9093	6.70026	71.3342	-1.41346	-0.499228	0.354723	0.732048	389
mmu-miR-149-5p	10.5246	6.35002	7.46907	4.68805	1.46767	0.553529	0.419507	0.777978	390
mmu-miR-1943-3p	1.04178	1.33167	0.642698	0.395362	-1.45204	-0.538082	0.409551	0.777978	391
mmu-miR-15b-5p	422.234	713.37	102.322	656.13	-1.35894	-0.442483	0.301775	0.667877	392
mmu-miR-5121	5.71191	4.66054	1.94068	3.63807	1.38444	0.469305	0.326175	0.69009	393
mmu-miR-872-5p	359.303	459.668	75.7472	148.934	-1.34668	-0.429408	0.298601	0.667877	394
mmu-miR-1a-3p	6.3829	9.17201	5.02473	7.21504	-1.45381	-0.539834	0.417402	0.777978	395
mmu-miR-190b-5p	41.8326	30.4745	9.66898	16.4136	1.39193	0.477085	0.355838	0.732048	396
mmu-miR-466k	0.560444	0.267369	0.184304	0.253952	1.43786	0.523925	0.410565	0.777978	397
mmu-miR-679-5p	1.24352	0.39696	1.27498	0.358399	1.55732	0.63907	0.502168	0.82592	398
mmu-miR-421-3p	50.7653	36.5149	5.13052	7.82662	1.30752	0.386836	0.278084	0.667877	399
mmu-miR-1193-5p	0.27208	0	0.471256	0	1.58782	0.667043	0.533089	0.846447	400
mmu-miR-6986-5p	0.225881	0.254034	0.159243	0.247353	-1.47832	-0.563956	0.469724	0.811969	401
mmu-miR-467e-3p	1.11651	0.675192	0.552098	0.192871	1.39523	0.480499	0.399766	0.775304	402
mmu-miR-16-2-3p	3.07949	3.18714	2.56297	1.37826	-1.43565	-0.521704	0.438937	0.793933	403
mmu-let-7k	10.286	7.54451	2.21816	3.44985	1.37246	0.456764	0.389339	0.774643	404
mmu-miR-450b-5p	17.759	19.0532	10.7072	4.1446	-1.36443	-0.448295	0.369637	0.751009	405
mmu-miR-215-5p	1.74763	0.951086	1.12702	0.602898	1.42405	0.510004	0.434442	0.78964	406
mmu-miR-1306-5p	3.93244	3.15066	3.26664	3.40743	1.43148	0.517504	0.444556	0.799575	407
mmu-miR-7658-5p	0.393042	0.405976	0.2912	0.142756	-1.39989	-0.485317	0.41558	0.777978	408
mmu-miR-466b-5p	0.267104	0.256335	0.404063	0.443985	-1.44673	-0.532797	0.463746	0.809447	409
mmu-miR-6984-3p	0.268548	1.03652	0.341287	0.991764	-1.56109	-0.642554	0.552679	0.852579	410
mmu-miR-466p-5p	0.343099	0.294861	0.388685	0.193721	-1.56742	-0.648389	0.567322	0.859231	411
mmu-miR-466g	0.536152	0.407151	0.464476	0.216405	-1.52173	-0.605717	0.542803	0.8482	412
mmu-miR-3547-3p	0.304754	0.36629	0.275015	0.320266	-1.51068	-0.5952	0.533348	0.846447	413
mmu-miR-126a-5p	57991.9	67866.2	24585	12909	-1.32274	-0.403532	0.32613	0.69009	414
mmu-miR-674-5p	72.0049	54.8724	10.2166	13.5297	1.26043	0.333918	0.284422	0.667877	415
mmu-miR-6540-5p	34.6931	24.9104	24.5521	17.0307	1.37418	0.458575	0.410009	0.777978	416
mmu-miR-361-3p	115.033	146.972	74.0131	101.664	-1.30609	-0.385254	0.306147	0.671839	417
mmu-miR-6953-3p	0.267056	0.0535973	0.166538	0.0928332	1.42293	0.508866	0.457582	0.806051	418
mmu-miR-3110-5p	2.18673	1.4969	0.732755	1.02858	1.39459	0.479836	0.425635	0.781072	419
mmu-miR-667-5p	0.22823	0.165887	0.334481	0.147734	-1.44053	-0.526604	0.484111	0.818041	420
mmu-miR-93-5p	2860.98	2179.89	342.387	225.215	1.2426	0.313366	0.281752	0.667877	421
mmu-miR-7652-5p	0.371042	0.456674	0.348131	0.427167	-1.39765	-0.483005	0.44975	0.803988	422
mmu-miR-26b-3p	6.57651	8.49943	1.89602	4.3118	-1.31273	-0.392568	0.337633	0.706188	423
mmu-miR-3100-5p	0.157526	0.143171	0.207633	0.157328	-1.40434	-0.489892	0.455781	0.806051	424
mmu-miR-331-5p	1.51786	1.9067	0.460708	0.289718	-1.3366	-0.418567	0.392475	0.774698	425
mmu-miR-30c-1-3p	7.35372	9.01245	0.843776	2.09087	-1.29885	-0.377234	0.322701	0.686522	426
mmu-miR-146a-3p	7.29256	3.16239	6.98142	2.25464	1.44653	0.532597	0.507066	0.828703	427
mmu-miR-17-5p	260.23	307.354	138.111	122.214	-1.32665	-0.407788	0.399105	0.775304	428
mmu-miR-1843b-5p	69.8995	48.4504	31.6793	20.6643	1.31915	0.399612	0.395214	0.774698	429
mmu-let-7a-5p	50711.9	35205.2	22668.2	7552.35	1.29222	0.369856	0.361931	0.741235	430
mmu-miR-6913-3p	0.993896	0.620358	0.204734	0.353486	1.37029	0.454485	0.458651	0.806051	431
mmu-miR-380-5p	1.88255	0.446644	2.40461	0.77361	1.52066	0.6047	0.619446	0.894238	432
mmu-miR-155-3p	0.814896	0.935985	0.0494805	0.305176	-1.32045	-0.401034	0.414473	0.777978	433
mmu-miR-1191a	8.648	9.9347	2.66918	1.65393	-1.2831	-0.359631	0.365512	0.745238	434
mmu-miR-1188-5p	0.429616	0.107195	0.566271	0.185666	1.42225	0.50818	0.523086	0.845619	435
mmu-miR-497b	0.350481	0.384575	0.177056	0.103239	-1.37018	-0.454364	0.471418	0.811969	436
mmu-miR-9-5p	90.4603	64.3605	80.7914	61.9952	1.33607	0.417995	0.428166	0.781072	437
mmu-miR-1933-3p	0.374759	0.402056	0.133077	0.107931	-1.36009	-0.443699	0.46882	0.811969	438
mmu-miR-344d-2-5p	1.30981	0.905996	0.957208	0.855372	1.45793	0.543921	0.572628	0.859231	439
mmu-miR-28c	0.935924	0.89344	0.92023	0.291304	-1.34913	-0.432034	0.462335	0.809447	440
mmu-miR-7073-5p	0.312523	0.278298	0.351835	0.28204	-1.40087	-0.486321	0.527344	0.846447	441
mmu-miR-20a-5p	1318.71	805.035	812.345	282.604	1.31146	0.391174	0.418461	0.777978	442
mmu-miR-140-3p	515.291	677.194	186.35	453.039	-1.24549	-0.316719	0.338382	0.706188	443
mmu-miR-301a-3p	326.174	288.751	241.86	48.4189	-1.39045	-0.475552	0.520701	0.843668	444
mmu-miR-181a-5p	5885.61	2736.13	6770.97	973.509	1.36351	0.447324	0.486262	0.818041	445
mmu-miR-1198-5p	149.939	106.708	114.156	69.7931	1.27383	0.349172	0.395419	0.774698	446
mmu-miR-3082-5p	0.241002	0.303564	0.22902	0.270175	-1.4096	-0.495288	0.538586	0.846447	447
mmu-miR-3101-5p	1.06812	1.36539	0.589454	1.06775	-1.35239	-0.435516	0.483801	0.818041	448
mmu-miR-335-3p	432.52	456.114	468.549	467.852	-1.37959	-0.464238	0.510858	0.832991	449
mmu-miR-1193-3p	5.52026	2.08608	7.23377	1.12303	1.42425	0.510203	0.558683	0.854718	450
mmu-miR-6919-5p	0.710145	0.495298	0.536314	0.42828	1.33851	0.420629	0.475946	0.817733	451
mmu-miR-7068-3p	2.81696	2.61314	1.23813	2.46929	1.30341	0.382294	0.427076	0.781072	452
mmu-miR-152-5p	10.0068	7.10055	4.03354	0.948402	1.26707	0.341501	0.400887	0.77552	453
mmu-miR-31-3p	99.8083	51.7858	79.6348	40.1034	1.38979	0.474863	0.536473	0.846447	454
mmu-miR-3075-5p	0.279132	0.165493	0.266814	0.286643	-1.40585	-0.49144	0.557181	0.854718	455
mmu-miR-345-3p	244.366	188.18	37.3831	37.1693	1.22664	0.294713	0.3884	0.774643	456
mmu-miR-1843a-5p	105.978	76.9572	43.4614	31.0446	1.27315	0.348407	0.419967	0.777978	457
mmu-miR-741-3p	2.09851	1.25955	1.19623	0.910325	1.34545	0.428084	0.502585	0.82592	458
mmu-miR-362-3p	24.7617	23.2941	16.4541	5.36398	-1.30646	-0.385665	0.458546	0.806051	459
mmu-miR-488-3p	0.325711	0.15507	0.0517713	0.148833	1.31803	0.398386	0.477178	0.81802	460
mmu-miR-6997-3p	0.232721	0.494116	0.210012	0.855833	1.42017	0.506061	0.611544	0.894238	461
mmu-miR-3061-3p	0.993571	1.95195	0.191479	2.20147	-1.3292	-0.410561	0.497727	0.825603	462
mmu-miR-7041-3p	0.632285	0.602492	0.645572	0.357156	-1.33481	-0.416635	0.503295	0.82592	463
mmu-miR-30b-3p	21.6742	25.0387	2.1386	2.65933	-1.24725	-0.318753	0.416362	0.777978	464
mmu-miR-323-3p	2.69065	1.75947	2.18272	1.10925	1.34527	0.4279	0.529797	0.846447	465
mmu-miR-449a-5p	4.75541	2.68896	2.33448	1.14154	1.33793	0.420001	0.528904	0.846447	466
mmu-miR-186-3p	10.3684	12.2434	2.85467	5.00202	-1.24828	-0.319936	0.424966	0.781072	467
mmu-miR-185-5p	231.205	182.255	51.3875	54.8747	1.20839	0.273089	0.407926	0.777978	468
mmu-miR-301b-3p	24.0033	27.2451	8.51461	7.97269	-1.24887	-0.320619	0.443764	0.799575	469
mmu-miR-664-3p	85.1263	166.651	38.4072	205.229	-1.25787	-0.330979	0.455857	0.806051	470
mmu-miR-1934-5p	5.62576	4.8379	4.98389	4.81636	1.28581	0.362678	0.485214	0.818041	471
mmu-miR-3572-5p	0.150687	0.153801	0.131728	0.266391	-1.31117	-0.390854	0.515852	0.837579	472
mmu-miR-7063-3p	0.85119	1.0752	0.57971	0.862173	-1.28558	-0.362418	0.487842	0.818041	473
mmu-miR-7065-3p	0.917737	0.56403	0.819077	0.562775	1.32836	0.409643	0.543622	0.8482	474
mmu-miR-3963	678.977	913.558	282.026	683.553	-1.22841	-0.296794	0.439351	0.793933	475
mmu-let-7g-3p	3.92149	4.92413	2.56384	2.69643	-1.26517	-0.339328	0.480851	0.818041	476
mmu-miR-200a-3p	1.94919	1.13197	1.15112	0.637298	1.28482	0.361569	0.501296	0.82592	477
mmu-miR-199b-5p	5.26495	2.43309	3.73396	0.487999	1.3204	0.400978	0.547754	0.8482	478
mmu-miR-452-3p	1.97144	1.3582	1.51137	1.33601	1.32895	0.410286	0.565785	0.858741	479
mmu-miR-125a-3p	57.3423	43.0733	24.1844	10.0392	1.21175	0.277092	0.450149	0.803988	480
mmu-miR-5132-5p	0.17754	0.0178658	0.112017	0.0309444	1.31554	0.395658	0.547796	0.8482	481
mmu-miR-191-3p	7.04226	7.96106	2.62281	0.732992	-1.23364	-0.302919	0.470833	0.811969	482
mmu-miR-219a-5p	11.9333	10.4561	12.6428	5.16176	-1.30197	-0.380691	0.538949	0.846447	483
mmu-miR-8112	0.783528	1.04419	0.24555	0.807451	-1.28156	-0.357906	0.524107	0.845619	484
mmu-miR-324-5p	100.325	85.363	52.3063	54.5807	1.23165	0.300591	0.471534	0.811969	485
mmu-miR-320-3p	307.316	282.565	42.6564	184.302	1.18896	0.249701	0.427721	0.781072	486
mmu-miR-30c-2-3p	70.9521	80.8786	7.36493	16.1806	-1.20836	-0.273046	0.463036	0.809447	487
mmu-miR-7661-3p	1.84969	1.2343	0.813943	0.621273	1.30648	0.38569	0.565353	0.858741	488
mmu-miR-466a-5p	0.656354	0.474701	0.850758	0.436093	-1.33407	-0.415831	0.614992	0.894238	489
mmu-miR-26a-5p	20184	22292.2	1771.08	3408.93	-1.16779	-0.223775	0.423447	0.781072	490
mmu-miR-7117-3p	1.22371	1.54939	0.555624	1.81593	1.30775	0.387086	0.572821	0.859231	491
mmu-miR-344c-3p	3.57102	3.71391	2.49797	0.905728	-1.26868	-0.343328	0.53765	0.846447	492
mmu-miR-3082-3p	0.443956	0.623514	0.19871	0.65841	-1.33554	-0.417427	0.624958	0.897017	493
mmu-miR-5126	2.70708	2.37772	2.44591	1.63651	-1.35521	-0.438518	0.649822	0.905741	494
mmu-miR-19b-1-5p	4.81093	4.69645	2.81447	1.7769	-1.25703	-0.330022	0.534955	0.846447	495
mmu-miR-342-3p	835.034	1266.55	496.977	1339.27	-1.20756	-0.272094	0.485861	0.818041	496
mmu-miR-3962	0.724274	0.328857	1.05069	0.301924	-1.36512	-0.449024	0.684335	0.927533	497
mmu-miR-1981-3p	25.3012	34.0134	14.4567	29.2491	-1.20616	-0.270421	0.489686	0.819345	498
mmu-miR-700-3p	81.8075	59.9562	51.0821	32.478	1.24127	0.311817	0.531861	0.846447	499
mmu-miR-128-1-5p	1.52683	1.09779	0.783481	0.766483	1.25442	0.327024	0.552844	0.852579	500
mmu-miR-151-5p	287.586	337.156	58.466	151.41	-1.16296	-0.2178	0.453729	0.806051	501
mmu-miR-1955-3p	0.714326	0.83866	0.275643	0.604394	-1.27467	-0.350129	0.583208	0.865172	502
mmu-miR-3060-3p	5.53908	8.19556	0.504285	6.84704	-1.20629	-0.270574	0.514007	0.83635	503
mmu-miR-376a-3p	5.74868	0.954712	8.62132	0.938401	1.40364	0.489173	0.7502	0.943829	504
mmu-miR-1955-5p	0.729514	0.677869	0.129963	0.69674	1.26775	0.342274	0.583237	0.865172	505
mmu-miR-377-5p	0.202643	0.0491308	0.350988	0.0850971	-1.30194	-0.380658	0.622576	0.89539	506
mmu-miR-3074-1-3p	0.407277	0.290948	0.362466	0.29486	-1.30304	-0.381878	0.629233	0.89925	507
mmu-miR-3068-3p	14.7063	15.7193	5.30806	2.82561	-1.18202	-0.241252	0.497681	0.825603	508
mmu-miR-3077-3p	1.3636	1.09661	1.27113	1.19658	1.26717	0.341613	0.583541	0.865172	509
mmu-miR-466d-3p	25.0591	19.6682	6.85872	2.20892	1.17892	0.237462	0.502285	0.82592	510
mmu-miR-6914-3p	3.63041	3.73667	2.28481	3.94637	1.22271	0.290077	0.545286	0.8482	511
mmu-miR-3069-3p	1.52691	1.14434	1.11192	1.1236	1.31606	0.396224	0.667357	0.918513	512
mmu-miR-466h-3p	1.07261	0.657272	0.500888	0.222831	1.24547	0.316688	0.570953	0.859231	513
mmu-miR-379-3p	3.46982	1.15845	4.56428	1.12841	1.32859	0.409896	0.693843	0.927533	514
mmu-miR-543-5p	0.530154	0.260312	0.702088	0.286051	-1.31223	-0.392019	0.672833	0.922743	515
mmu-miR-542-3p	245.259	261.698	181.977	206.341	-1.24971	-0.321599	0.587909	0.868296	516
mmu-miR-666-5p	0.289085	0.071463	0.50071	0.123778	-1.29913	-0.377543	0.648023	0.904876	517
mmu-miR-1843b-3p	22.5599	16.6321	20.922	12.9539	1.22579	0.29371	0.563294	0.858353	518
mmu-miR-3057-5p	6.15298	5.98869	2.20016	5.66007	1.21807	0.284591	0.558037	0.854718	519
mmu-miR-6899-3p	2.56079	2.67062	1.40368	1.56635	-1.23283	-0.301978	0.577842	0.865074	520
mmu-miR-429-3p	0.766199	0.827073	0.318921	0.173653	-1.22577	-0.29369	0.570299	0.859231	521
mmu-miR-744-5p	115.697	120.46	33.964	109.815	1.17407	0.231523	0.52607	0.846447	522
mmu-miR-374b-5p	139.72	164.201	34.4544	66.3844	-1.18018	-0.239005	0.535748	0.846447	523
mmu-miR-1949	3.73363	2.62554	1.99029	1.07185	1.20881	0.273592	0.571963	0.859231	524
mmu-miR-1966-3p	0.955277	1.08734	0.621574	1.34276	1.25867	0.331901	0.634114	0.899901	525
mmu-miR-17-3p	148.716	125.279	25.3059	38.322	1.1509	0.202765	0.496897	0.825603	526
mmu-miR-30d-5p	3826.64	4382.51	1541.93	2335.24	-1.15249	-0.204753	0.507149	0.828703	527
mmu-miR-676-3p	41.2994	33.038	35.6808	27.4559	1.19475	0.256703	0.559858	0.854813	528
mmu-miR-346-5p	0.243803	0.266131	0.220012	0.259132	-1.22341	-0.29091	0.618531	0.894238	529
mmu-miR-19b-3p	3183.53	2454.97	2635.33	115.834	-1.23972	-0.310018	0.635694	0.899901	530
mmu-miR-541-3p	0.547159	0.071463	0.731037	0.123778	1.2921	0.369714	0.699694	0.927533	531
mmu-miR-30e-5p	1873.9	1729.92	1403.03	554.187	-1.19615	-0.258393	0.586672	0.868138	532
mmu-miR-466c-5p	5.88764	2.6731	5.99251	2.43597	1.29367	0.371472	0.704104	0.927533	533
mmu-miR-30a-5p	5769.15	6202.07	2351.34	2711.87	-1.16669	-0.222418	0.556887	0.854718	534
mmu-miR-1306-3p	9.6113	6.60155	7.36487	2.91809	1.19542	0.257516	0.606243	0.891943	535
mmu-miR-7091-5p	0.491754	0.130156	0.588591	0.143026	1.26263	0.33643	0.688402	0.927533	536
mmu-miR-669m-3p	1.09432	0.438969	1.46207	0.391111	-1.28995	-0.367315	0.707421	0.930307	537
mmu-miR-499-5p	1.217	0.662367	0.879843	0.178628	1.22065	0.287651	0.639885	0.901348	538
mmu-miR-1953	0.31358	0.22458	0.128184	0.300962	1.24517	0.316346	0.674653	0.923589	539
mmu-miR-5615-5p	0.422451	0.428778	0.610435	0.742665	-1.25438	-0.32698	0.68864	0.927533	540
mmu-let-7e-5p	12121.7	9526.3	5005.52	1310.21	1.15095	0.202828	0.547647	0.8482	541
mmu-miR-744-3p	4.84803	7.33799	1.36861	6.65519	-1.19353	-0.255239	0.61596	0.894238	542
mmu-miR-29c-3p	989.141	969.129	575.508	176.124	-1.16962	-0.226035	0.579665	0.865172	543
mmu-miR-877-5p	10.003	14.7568	2.69381	18.4586	1.18147	0.240587	0.617135	0.894238	544
mmu-miR-423-3p	194.653	148.769	156.866	96.2601	1.16356	0.218543	0.607945	0.892737	545
mmu-miR-677-3p	0.687791	0.548895	0.786448	0.383241	-1.20745	-0.271965	0.67059	0.921311	546
mmu-miR-701-3p	0.509307	0.242446	0.383738	0.291966	1.23397	0.303312	0.700545	0.927533	547
mmu-miR-320-5p	0.585765	0.445256	0.148898	0.194825	1.2037	0.267477	0.678695	0.925531	548
mmu-miR-6239	0.203202	0.200437	0.268487	0.259919	-1.20094	-0.264166	0.683696	0.927533	549
mmu-miR-188-5p	13.2203	12.5291	7.3421	1.66463	-1.15983	-0.213916	0.621334	0.89528	550
mmu-miR-423-5p	203.506	205.771	111.158	192.981	1.14635	0.197048	0.592399	0.873248	551
mmu-miR-219b-5p	0.312226	0.24412	0.184004	0.231869	-1.1993	-0.26219	0.687197	0.927533	552
mmu-miR-1839-5p	231.535	193.213	68.0442	71.2559	1.15126	0.203219	0.619062	0.894238	553
mmu-miR-29a-3p	22782.2	19217.6	4431.15	2087.19	1.11607	0.158428	0.547166	0.8482	554
mmu-miR-21b	3.42711	3.33195	1.32882	0.456986	-1.16249	-0.217216	0.631114	0.89925	555
mmu-miR-466e-5p	0.26224	0.142926	0.393093	0.247555	-1.19602	-0.258245	0.692482	0.927533	556
mmu-miR-98-5p	775.409	665.713	63.6674	285.399	1.16541	0.220836	0.643499	0.903486	557
mmu-miR-1843a-3p	38.7068	28.4218	35.9293	22.2724	1.16798	0.22401	0.660856	0.916133	558
mmu-miR-7052-3p	0.424592	0.307631	0.202865	0.268412	1.20036	0.26347	0.700965	0.927533	559
mmu-miR-669d-5p	13.0047	9.97675	7.14028	2.61693	1.15204	0.204195	0.636258	0.899901	560
mmu-miR-669p-3p	1.7067	1.84299	1.1193	0.503376	-1.1741	-0.231561	0.679687	0.925531	561
mmu-miR-130a-3p	1050.75	814.318	436.174	80.0862	1.13781	0.186262	0.614105	0.894238	562
mmu-miR-136-3p	12.728	3.70989	18.8434	3.43385	1.25061	0.322631	0.769056	0.956715	563
mmu-miR-6994-3p	0.443104	0.178658	0.345163	0.309444	1.23572	0.30535	0.7415	0.939722	564
mmu-miR-532-3p	34.7464	32.8972	13.351	22.8147	1.14116	0.190507	0.630875	0.89925	565
mmu-miR-139-5p	937.517	1065.1	258.96	545.789	-1.11977	-0.163209	0.583434	0.865172	566
mmu-miR-377-3p	7.37114	0.996721	9.74246	0.808623	1.28449	0.361198	0.809321	0.961683	567
mmu-miR-7042-3p	0.822339	0.809207	0.481248	0.20241	-1.16331	-0.21824	0.67934	0.925531	568
mmu-miR-330-3p	4.05326	6.12454	0.293821	4.72024	-1.15083	-0.202679	0.653075	0.908627	569
mmu-miR-7682-3p	1.72199	1.31336	1.78221	0.406319	-1.17496	-0.232611	0.702301	0.927533	570
mmu-miR-221-5p	72.1671	60.9106	15.8048	16.9786	1.13522	0.182975	0.626043	0.897017	571
mmu-miR-103-3p	10248.5	8547.43	3201.76	2281.46	1.11979	0.16323	0.616596	0.894238	572
mmu-miR-369-3p	10.1141	3.88479	13.7851	2.82366	1.19948	0.262411	0.735369	0.939722	573
mmu-miR-188-3p	1.00694	0.60877	0.844979	0.208837	1.1789	0.237438	0.720664	0.935708	574
mmu-miR-29b-3p	5532.14	4651.55	4416.1	2967.11	-1.17486	-0.232483	0.711367	0.932304	575
mmu-miR-331-3p	39.1619	53.3598	10.8285	46.6515	-1.13276	-0.179847	0.635287	0.899901	576
mmu-miR-148b-5p	11.4041	12.1059	3.36963	3.19962	-1.135	-0.182697	0.63844	0.901328	577
mmu-miR-1948-3p	0.284138	0.462734	0.267749	0.510234	-1.19531	-0.257389	0.73783	0.939722	578
mmu-miR-7688-5p	7.26834	5.75533	4.61537	2.47922	1.15107	0.202977	0.687942	0.927533	579
mmu-miR-1191b-5p	0.494119	0.255216	0.273396	0.242409	1.17362	0.230971	0.721256	0.935708	580
mmu-miR-99b-5p	5456.26	5056.52	3838.29	4351.41	1.12988	0.176164	0.640802	0.901348	581
mmu-miR-6516-3p	0.704947	1.08198	0.463635	1.53263	1.17515	0.232849	0.728003	0.936526	582
mmu-miR-351-5p	381.858	214.754	445.825	135.247	1.17088	0.227591	0.722825	0.935708	583
mmu-let-7d-3p	351.468	480.72	115.9	437.793	-1.1231	-0.167492	0.646738	0.904876	584
mmu-miR-6934-5p	0.335642	0.523899	0.389642	0.778034	-1.16844	-0.224579	0.726019	0.935708	585
mmu-miR-101b-3p	614.039	546.841	435.457	126.952	-1.14015	-0.189217	0.696213	0.927533	586
mmu-miR-194-2-3p	4.26548	2.43411	4.12011	0.91479	1.16539	0.220807	0.726148	0.935708	587
mmu-miR-7093-3p	2.08242	2.00871	1.4139	1.87944	1.14532	0.19575	0.703868	0.927533	588
mmu-miR-1927	0.520639	0.331775	0.299424	0.295467	1.15263	0.204932	0.725035	0.935708	589
mmu-miR-139-3p	94.8727	65.155	92.3934	35.6555	1.13996	0.18898	0.702017	0.927533	590
mmu-miR-29c-5p	53.5362	45.789	7.076	8.57212	1.1111	0.151991	0.647947	0.904876	591
mmu-miR-7067-3p	0.556404	1.03653	0.324107	1.34429	-1.15879	-0.212622	0.740507	0.939722	592
mmu-miR-491-5p	9.61221	8.28599	8.37945	6.9501	1.14311	0.192969	0.736169	0.939722	593
mmu-miR-322-3p	135.379	140.946	57.5154	53.7642	-1.10553	-0.144743	0.666707	0.918513	594
mmu-miR-6418-3p	1.5969	1.77056	1.56151	1.7418	-1.14326	-0.193159	0.740424	0.939722	595
mmu-miR-532-5p	449.503	384.531	101.539	75.8071	1.1004	0.138027	0.659129	0.915391	596
mmu-miR-5119	1.06508	1.08224	0.691919	0.427736	-1.13781	-0.186255	0.731504	0.939457	597
mmu-miR-874-3p	25.4735	25.0754	11.5075	6.22179	-1.12247	-0.166671	0.714252	0.93449	598
mmu-miR-652-3p	428.404	497.291	52.8728	281.455	-1.0955	-0.131593	0.663612	0.917114	599
mmu-miR-339-3p	8.11963	9.05187	3.98378	5.40978	-1.11024	-0.150869	0.697912	0.927533	600
mmu-miR-542-5p	23.0166	27.1941	12.4499	24.3888	1.13878	0.187488	0.746407	0.943829	601
mmu-miR-7083-5p	2.26472	3.06574	1.77954	3.33003	-1.12531	-0.170323	0.740032	0.939722	602
mmu-miR-1b-3p	2.08337	1.43315	0.906705	0.531425	1.1224	0.166593	0.73343	0.939722	603
mmu-miR-7689-3p	0.935899	1.80159	0.463608	2.4756	-1.13799	-0.186489	0.764907	0.956715	604
mmu-miR-374b-3p	2.22547	2.10958	1.26989	1.68788	-1.14109	-0.190414	0.773663	0.956801	605
mmu-miR-24-3p	16635.1	14682.9	2212.23	4099.92	1.08713	0.120524	0.663952	0.917114	606
mmu-let-7e-3p	43.776	54.4859	11.458	42.1061	-1.09904	-0.136239	0.698825	0.927533	607
mmu-let-7i-5p	16293.5	14413.3	89.6173	4650.59	1.10499	0.144035	0.710871	0.932304	608
mmu-miR-3079-3p	0.417427	0.273082	0.158214	0.268132	1.12866	0.174616	0.77039	0.956715	609
mmu-miR-547-3p	0.39828	0.0893288	0.628093	0.154722	1.13988	0.188883	0.791568	0.961683	610
mmu-miR-7015-3p	2.86551	2.55946	1.33922	1.40415	1.11451	0.156405	0.747866	0.943829	611
mmu-miR-129-5p	134.7	109.483	131.042	89.7782	1.11862	0.161718	0.768737	0.956715	612
mmu-miR-540-5p	1.36208	0.280727	2.09997	0.338066	1.16576	0.221275	0.845582	0.969986	613
mmu-miR-3102-3p	4.29396	4.3823	2.953	3.48384	1.116	0.158333	0.766567	0.956715	614
mmu-miR-130b-3p	115.174	139.89	17.609	101.455	-1.09597	-0.132212	0.722357	0.935708	615
mmu-miR-181a-2-3p	72.9837	87.5182	68.3505	96.3782	-1.12383	-0.168424	0.786977	0.961683	616
mmu-miR-7068-5p	0.34823	0.291424	0.232121	0.296906	-1.13426	-0.181755	0.798749	0.961683	617
mmu-miR-33-5p	2.32881	1.20987	1.73131	0.181501	1.14753	0.198527	0.82433	0.969503	618
mmu-miR-574-3p	150.022	163.822	56.3489	147.027	1.09468	0.130515	0.723961	0.935708	619
mmu-miR-1930-3p	0.729839	0.585809	0.324109	0.102688	-1.12318	-0.167589	0.792308	0.961683	620
mmu-miR-18a-5p	140.164	110.403	94.9323	11.9016	-1.11751	-0.160293	0.785644	0.961683	621
mmu-miR-203-3p	32.0894	32.01	25.1103	13.8803	-1.11035	-0.151009	0.772348	0.956715	622
mmu-miR-29a-5p	98.8921	72.1597	61.9618	5.40704	1.1031	0.141565	0.750885	0.943829	623
mmu-miR-155-5p	2304.69	2122.69	689.067	1202.38	1.10394	0.142658	0.755951	0.948644	624
mmu-miR-3058-5p	0.961378	0.939363	0.362657	0.222231	-1.11108	-0.15196	0.780367	0.957383	625
mmu-miR-669l-3p	0.550344	0.382791	0.425475	0.168755	-1.1305	-0.176958	0.813608	0.964277	626
mmu-miR-148b-3p	1851.28	1903.37	441.261	492.137	-1.07735	-0.107485	0.702812	0.927533	627
mmu-let-7b-5p	12203.4	12246.9	7004.02	5951.96	-1.08153	-0.113069	0.719881	0.935708	628
mmu-miR-21a-5p	103942	85610.3	60881.6	47896.9	1.10681	0.14641	0.778742	0.957383	629
mmu-miR-466n-3p	0.633864	0.559208	0.403408	0.347631	-1.1388	-0.18751	0.840123	0.969986	630
mmu-miR-3076-3p	1.12188	1.17412	0.935475	0.793571	-1.10991	-0.150443	0.800262	0.961683	631
mmu-miR-702-3p	1.74341	1.8534	0.367594	0.96969	-1.09637	-0.132741	0.779153	0.957383	632
mmu-miR-380-3p	1.34239	0.362612	1.71131	0.32202	1.14663	0.197401	0.869819	0.969986	633
mmu-miR-6951-5p	0.256913	0.112299	0.381097	0.194508	-1.11673	-0.15928	0.831568	0.969986	634
mmu-miR-125a-5p	11547.1	9182.44	10595.4	6572.99	1.08978	0.124032	0.771284	0.956715	635
mmu-miR-701-5p	14.4459	12.6744	1.73007	1.34726	1.08137	0.112855	0.750292	0.943829	636
mmu-miR-669f-3p	7.40129	6.3157	4.18819	3.04981	1.09528	0.131305	0.794895	0.961683	637
mmu-miR-7a-5p	1653.8	1423.84	1044.19	910.98	1.09761	0.134371	0.804291	0.961683	638
mmu-miR-6980-3p	1.05539	1.19871	0.666015	1.23691	1.11232	0.153567	0.835699	0.969986	639
mmu-miR-27a-3p	2884.11	2675.54	1617.78	474.826	-1.07402	-0.103027	0.761239	0.953721	640
mmu-miR-3109-5p	0.418251	0.573794	0.510795	0.852133	-1.10818	-0.14819	0.839404	0.969986	641
mmu-miR-21c	46.634	38.5974	25.4005	20.9141	1.09316	0.128506	0.808336	0.961683	642
mmu-miR-344-3p	51.3792	45.32	34.3137	28.821	1.0794	0.11023	0.780114	0.957383	643
mmu-miR-6540-3p	7.97598	7.35278	3.49496	4.18042	1.08087	0.112191	0.790289	0.961683	644
mmu-miR-6967-5p	0.343733	0.365142	0.364018	0.542266	1.10283	0.141205	0.83318	0.969986	645
mmu-let-7f-5p	59134.9	53874.4	13904.5	22535.5	1.08514	0.117877	0.802085	0.961683	646
mmu-miR-200b-3p	1.67448	1.86611	1.09453	0.991858	-1.09535	-0.131396	0.83012	0.969986	647
mmu-miR-5125	0.758416	0.672678	0.472462	0.190332	-1.09107	-0.125738	0.815389	0.964898	648
mmu-miR-3064-5p	4.74004	4.23392	1.93348	1.89638	1.07776	0.108039	0.790964	0.961683	649
mmu-miR-450a-5p	34.3954	28.6187	29.0262	11.3191	-1.08346	-0.115649	0.80258	0.961683	650
mmu-miR-1197-3p	0.357105	0.0535973	0.618524	0.0928332	-1.11005	-0.150622	0.860856	0.969986	651
mmu-miR-7021-5p	0.633622	0.385007	0.650742	0.33381	-1.10625	-0.145677	0.858321	0.969986	652
mmu-miR-669l-5p	2.2546	1.89696	0.753871	0.826818	1.0877	0.121275	0.822819	0.96921	653
mmu-miR-378a-3p	430.117	307.733	361.149	104.542	1.08137	0.112861	0.810084	0.961683	654
mmu-miR-337-3p	5.26902	1.76001	6.96377	1.07622	1.11231	0.15356	0.875022	0.969986	655
mmu-miR-671-3p	10.4045	10.5409	5.82666	5.49403	-1.07385	-0.102797	0.795016	0.961683	656
mmu-miR-1291	4.61696	7.39159	0.875895	8.15875	-1.08382	-0.116128	0.81892	0.966099	657
mmu-miR-466q	0.601497	0.362411	0.397096	0.40778	1.0943	0.130005	0.844556	0.969986	658
mmu-miR-758-3p	0.255075	0.0357315	0.441803	0.0618888	-1.10641	-0.145881	0.867854	0.969986	659
mmu-miR-376b-3p	6.26815	1.99355	8.57802	1.37747	1.11333	0.154875	0.883865	0.969986	660
mmu-miR-128-3p	451.243	413.257	91.3641	125.716	1.05753	0.0806926	0.776848	0.957383	661
mmu-miR-6516-5p	3.08487	2.72657	2.1588	1.01323	-1.08066	-0.111916	0.839318	0.969986	662
mmu-miR-1249-3p	7.86014	11.3262	3.32224	11.2632	-1.07044	-0.0981973	0.818216	0.966099	663
mmu-miR-700-5p	31.1016	33.8981	12.0974	20.7413	-1.06102	-0.0854489	0.800091	0.961683	664
mmu-miR-6954-3p	0.288843	0.074866	0.41121	0.129672	1.08793	0.121588	0.863447	0.969986	665
mmu-miR-6976-3p	0.370086	0.318336	0.600965	0.509419	-1.09107	-0.125747	0.875353	0.969986	666
mmu-miR-674-3p	69.9256	76.0896	41.8905	72.0985	1.06271	0.087749	0.829141	0.969986	667
mmu-miR-297b-3p	10.6145	9.04154	6.06895	2.04782	1.06621	0.092485	0.832073	0.969986	668
mmu-miR-297c-3p	11.7318	9.99328	6.70778	2.26339	1.06621	0.092485	0.832073	0.969986	669
mmu-miR-425-3p	55.6821	50.2316	26.9636	23.6883	1.06036	0.0845521	0.810168	0.961683	670
mmu-miR-362-5p	42.3091	42.8224	7.49614	10.9004	-1.05543	-0.0778338	0.808041	0.961683	671
mmu-miR-451a	0.288464	0.117914	0.432402	0.204233	-1.08895	-0.122937	0.878451	0.969986	672
mmu-miR-322-5p	676.16	683.453	40.8284	189.651	-1.05217	-0.0733652	0.805601	0.961683	673
mmu-miR-5709-5p	0.412936	0.398142	0.179439	0.466311	-1.0748	-0.104068	0.8629	0.969986	674
mmu-miR-3088-3p	0.167376	0.0535973	0.179599	0.0928332	1.0747	0.10393	0.861446	0.969986	675
mmu-let-7c-5p	54353.6	51816.3	23025.8	8437.86	-1.05405	-0.0759451	0.80922	0.961683	676
mmu-miR-6952-3p	0.766833	1.17198	0.343227	1.55255	1.07375	0.102658	0.860071	0.969986	677
mmu-miR-1964-3p	3.76174	3.45689	3.14893	3.01308	1.06709	0.0936782	0.856024	0.969986	678
mmu-miR-449c-5p	0.346579	0.182476	0.302974	0.162507	1.07706	0.107101	0.870731	0.969986	679
mmu-miR-708-5p	0.82169	0.86147	0.726201	1.09249	-1.0842	-0.116626	0.887189	0.969986	680
mmu-miR-6948-3p	0.855555	0.766298	0.673841	0.685498	1.0676	0.0943655	0.863268	0.969986	681
mmu-miR-450a-1-3p	4.09088	3.32703	1.49041	2.33278	1.06421	0.0897837	0.859141	0.969986	682
mmu-miR-324-3p	57.7557	65.7991	25.8156	61.4431	1.06087	0.0852425	0.840484	0.969986	683
mmu-miR-466d-5p	0.655187	0.232255	0.598554	0.402277	1.09063	0.125155	0.904411	0.969986	684
mmu-miR-219c-5p	0.476621	0.507941	0.0338897	0.379176	-1.06768	-0.0944801	0.867272	0.969986	685
mmu-miR-218-5p	804.102	582.142	791.326	534.65	1.08261	0.114508	0.888437	0.969986	686
mmu-miR-466n-5p	0.655187	0.232255	0.598554	0.402277	1.09063	0.125155	0.904411	0.969986	687
mmu-miR-101b-5p	1.15404	1.39624	0.524291	1.50066	1.07069	0.0985425	0.877633	0.969986	688
mmu-miR-6945-3p	1.42134	1.23578	1.62343	1.45256	1.07521	0.104617	0.88741	0.969986	689
mmu-miR-297a-3p	20.264	17.2611	11.5862	3.90948	1.05437	0.0763752	0.854431	0.969986	690
mmu-miR-5099	184.633	177.298	89.7345	101.494	1.05219	0.0733978	0.849087	0.969986	691
mmu-miR-7042-5p	0.902016	0.732648	0.66321	0.224632	-1.06456	-0.0902603	0.881816	0.969986	692
mmu-miR-669b-3p	0.392447	0.131016	0.485433	0.226926	-1.07559	-0.105135	0.904554	0.969986	693
mmu-miR-466m-3p	0.881028	0.582302	0.590792	0.199757	1.06664	0.0930737	0.898053	0.969986	694
mmu-miR-3069-5p	1.69136	1.38047	0.22752	0.934059	1.05827	0.0817056	0.875418	0.969986	695
mmu-miR-23a-3p	10010.7	10441.5	2372.52	4989.43	-1.03376	-0.0479003	0.848713	0.969986	696
mmu-let-7j	6.54664	6.06046	3.05439	3.33586	-1.05772	-0.0809542	0.880815	0.969986	697
mmu-miR-704	1.27785	1.21155	0.75005	0.751772	1.05407	0.0759709	0.877182	0.969986	698
mmu-miR-7059-3p	0.244378	0.0893288	0.300636	0.154722	1.06193	0.0866822	0.90057	0.969986	699
mmu-miR-328-3p	125.801	150.515	81.3377	147.109	-1.04725	-0.0665998	0.869719	0.969986	700
mmu-let-7f-1-3p	23.4063	21.8963	5.06931	7.5702	1.04308	0.0608497	0.864206	0.969986	701
mmu-miR-21a-3p	182.285	98.6417	238.295	90.3961	-1.06222	-0.0870772	0.907453	0.969986	702
mmu-miR-186-5p	636.804	615.953	313.193	230.224	-1.03857	-0.0546003	0.863875	0.969986	703
mmu-miR-3572-3p	2.16592	2.18783	0.59382	1.6918	1.0515	0.0724488	0.878457	0.969986	704
mmu-miR-7079-3p	0.380742	0.307631	0.303354	0.268412	-1.05984	-0.0838472	0.901554	0.969986	705
mmu-miR-19a-3p	200.225	104.272	181.05	10.7001	1.06181	0.086522	0.910034	0.969986	706
mmu-miR-23b-3p	4236.05	4497.84	996.839	2424.73	-1.03201	-0.0454559	0.863618	0.969986	707
mmu-miR-7027-3p	0.282879	0.071463	0.446509	0.123778	-1.06192	-0.0866804	0.914398	0.969986	708
mmu-miR-204-5p	13.6719	13.889	3.78182	9.50269	1.04682	0.0660151	0.88655	0.969986	709
mmu-miR-361-5p	712.03	730.266	123.891	302.797	-1.03308	-0.0469579	0.871433	0.969986	710
mmu-miR-27b-3p	9787.66	9511.16	2281.64	2150.89	-1.0317	-0.0450177	0.874574	0.969986	711
mmu-miR-298-3p	1.50832	1.89018	0.274952	1.64285	-1.04534	-0.0639668	0.892088	0.969986	712
mmu-miR-7679-3p	0.567176	0.964836	0.401406	1.52054	-1.06116	-0.085644	0.923764	0.969986	713
mmu-miR-223-3p	11.1679	8.43949	5.39465	2.17433	1.04324	0.061068	0.895451	0.969986	714
mmu-miR-483-3p	0.590108	2.61507	0.27875	4.32681	-1.06053	-0.084787	0.924311	0.969986	715
mmu-miR-450b-3p	30.9343	29.6111	14.2492	12.312	-1.03768	-0.0533605	0.89183	0.969986	716
mmu-miR-677-5p	5.06711	4.30722	2.01876	2.029	1.04057	0.0573733	0.900798	0.969986	717
mmu-miR-3076-5p	0.944373	1.42602	0.380785	1.76498	-1.04711	-0.0664107	0.909238	0.969986	718
mmu-miR-1982-3p	1.50046	1.86414	0.899364	1.91604	1.05012	0.0705497	0.913654	0.969986	719
mmu-miR-7083-3p	1.84499	1.17682	2.67842	1.06392	-1.05731	-0.0803978	0.931547	0.972049	720
mmu-miR-3102-3p.2-3p	2.9094	3.19497	2.14735	3.10772	1.04303	0.0607798	0.910496	0.969986	721
mmu-miR-106b-3p	218.282	232.607	163.97	206.987	-1.03375	-0.0478852	0.906248	0.969986	722
mmu-miR-6975-3p	2.71739	3.15279	2.10608	3.00069	-1.03926	-0.0555615	0.912013	0.969986	723
mmu-miR-7080-5p	0.976064	1.00332	0.516756	0.87725	-1.04749	-0.06694	0.939554	0.975547	724
mmu-miR-500-3p	30.3742	30.3168	4.15937	8.94771	-1.02727	-0.0388146	0.902623	0.969986	725
mmu-miR-503-5p	62.2209	56.3915	10.8999	14.2908	1.03028	0.0430397	0.907495	0.969986	726
mmu-miR-433-3p	5.31454	2.65737	7.60398	2.68586	1.05205	0.0732067	0.951899	0.979971	727
mmu-miR-136-5p	6.72612	1.96657	8.97737	2.24935	1.04727	0.0666314	0.956836	0.983094	728
mmu-miR-152-3p	1597.78	1404.87	741.283	468.847	1.02732	0.0388922	0.910086	0.969986	729
mmu-miR-3084-3p	5.83437	5.14625	0.948355	1.51562	1.03049	0.0433372	0.919015	0.969986	730
mmu-miR-503-3p	71.0337	58.784	65.4573	40.6964	1.03123	0.0443623	0.924061	0.969986	731
mmu-miR-3065-3p	0.418115	0.0683559	0.527208	0.118396	1.04227	0.059731	0.949407	0.979971	732
mmu-miR-668-3p	0.441477	0.165493	0.693221	0.286643	-1.03866	-0.0547199	0.942521	0.975547	733
mmu-miR-7054-3p	0.857841	0.65609	0.677109	0.354235	1.03286	0.0466442	0.929207	0.970926	734
mmu-miR-9-3p	21.6486	16.7913	21.4499	15.1356	1.0348	0.0493497	0.941298	0.975547	735
mmu-miR-3108-5p	2.09396	1.84111	1.1064	0.322735	-1.03122	-0.0443571	0.927945	0.970926	736
mmu-miR-3068-5p	112.461	93.1118	62.6258	24.2531	1.02765	0.039343	0.919143	0.969986	737
mmu-miR-3535	78.6914	75.68	18.7983	13.5715	-1.02476	-0.0352924	0.916415	0.969986	738
mmu-miR-425-5p	684.585	651.355	243.506	273.694	1.02274	0.0324402	0.917732	0.969986	739
mmu-miR-29b-2-5p	14.7763	14.5905	5.20649	4.91089	-1.02434	-0.0346979	0.922191	0.969986	740
mmu-miR-598-3p	23.0843	22.8707	10.0772	14.1177	1.02847	0.0405009	0.940989	0.975547	741
mmu-miR-7654-5p	0.852539	1.0216	0.240575	1.08567	1.02903	0.0412907	0.941328	0.975547	742
mmu-miR-219a-1-3p	1.91582	1.62332	1.03316	0.639937	1.02602	0.0370593	0.940454	0.975547	743
mmu-miR-107-3p	452.772	439.508	33.803	89.4515	-1.01997	-0.0285217	0.924518	0.969986	744
mmu-miR-25-3p	2695.42	2579.08	795.189	974.734	1.01712	0.0244841	0.9291	0.970926	745
mmu-miR-142a-5p	2.05157	0.527116	1.98436	0.261907	-1.03032	-0.0430972	0.971471	0.990136	746
mmu-miR-296-5p	111.616	147.585	39.6629	152.721	1.0201	0.0287167	0.946189	0.978025	747
mmu-miR-181b-1-3p	7.18095	6.14976	3.99655	3.62722	-1.02141	-0.0305618	0.951447	0.979971	748
mmu-miR-20b-5p	0.634845	0.57751	0.230967	0.500715	-1.02332	-0.0332618	0.967122	0.987971	749
mmu-miR-351-3p	10.5347	15.8283	9.19984	20.7868	1.02208	0.0315137	0.961262	0.984332	750
mmu-miR-20a-3p	7.18054	5.67449	3.53808	0.458359	1.01889	0.0270024	0.957493	0.983094	751
mmu-miR-345-5p	87.2857	97.0141	26.7726	69.1893	-1.01209	-0.0173443	0.960554	0.984332	752
mmu-miR-378a-5p	37.6818	40.6845	22.993	35.9177	-1.01205	-0.0172843	0.967388	0.987971	753
mmu-miR-301b-5p	1.30717	1.1398	0.526161	0.339244	-1.01287	-0.0184427	0.973556	0.990136	754
mmu-miR-673-5p	1.16234	0.290948	1.57809	0.29486	1.01899	0.0271331	0.978533	0.990136	755
mmu-miR-103-2-5p	1.24593	1.53793	0.291106	1.3647	-1.01196	-0.0171561	0.974634	0.990136	756
mmu-miR-26b-5p	4759.34	4653.41	1275.99	1877.26	-1.00769	-0.0110507	0.977089	0.990136	757
mmu-miR-27b-5p	25.9926	24.6023	4.88861	2.53433	-1.00712	-0.0102413	0.975869	0.990136	758
mmu-let-7g-5p	2909.91	2783.35	381.481	845.292	1.00726	0.0104432	0.977837	0.990136	759
mmu-miR-190b-3p	0.26476	0.173787	0.0462008	0.154769	-1.00773	-0.0111127	0.985091	0.995461	760
mmu-miR-1945	6.86783	6.52793	1.67369	1.75481	1.00427	0.00615412	0.988044	0.996855	761
mmu-miR-200c-3p	2.1725	2.58104	1.89316	2.30203	-1.00518	-0.00744824	0.99054	0.996855	762
mmu-miR-93-3p	19.4705	20.0499	10.4757	13.8749	1.0034	0.00489695	0.989466	0.996855	763
mmu-let-7i-3p	68.0592	56.7354	43.2475	11.9592	1.0028	0.00403626	0.991663	0.996855	764
mmu-miR-191-5p	3213.93	3255.86	1693.02	2217.19	1.00194	0.00279876	0.993101	0.996995	765
mmu-miR-335-5p	2319.65	1875.23	1451.96	815.461	1.00144	0.00207387	0.996607	0.998356	766
mmu-miR-6967-3p	3.89732	9.64586	1.09977	13.1968	1.00156	0.00225425	0.997056	0.998356	767
mmu-miR-1981-5p	98.1197	99.9779	75.0961	86.4352	1.00043	0.000618733	0.998758	0.998758	768

## Sheet: ALL miRs ECs LA-Tg vs WT
Feature identifier	Mean expression level for the specified group	Mean expression level for the specified group	Standard deviation (of the expression) for the specified sample group	Standard deviation (of the expression) for the specified sample group	Expression ratio (fold change) between compared sample groups	Expression ratio (fold change) between the compared sample groups on the 2-logarithmic scale	T-test p value for the comparison between the sample groups	FDR adjusted p value for the comparison between the sample groups	Average ranking value based on both p value and fold change; value 1 is the strongest DE feature
ID	mean_WT	mean_Pr	sd_WT	sd_Pr	FC	logFC	P.Value	adj.P.Val	avgRank
mmu-miR-7224-3p	3.33168	0.141586	1.19106	0.135891	12.264	3.61636	0.00298126	0.989345	1
mmu-miR-6981-5p	0.613796	0	0.346097	0	6.49453	2.69922	0.0150388	0.989345	2
mmu-miR-466q	2.67068	0.362411	1.87425	0.40778	5.24575	2.39115	0.0197716	0.989345	3
mmu-miR-692	0.852877	0	0.804518	0	5.73185	2.519	0.0486893	0.989345	4
mmu-miR-466k	0	0.267369	0	0.253952	-4.70034	-2.23276	0.0316478	0.989345	5
mmu-miR-6240	25.8429	3.68815	27.0157	1.29693	4.53994	2.18267	0.0500485	0.989345	6
mmu-miR-5132-5p	0.560268	0.0178658	0.472691	0.0309444	4.01807	2.0065	0.0466015	0.989345	7
mmu-miR-133a-3p	2.14806	0.607436	0.836275	1.05211	4.44874	2.1534	0.0650114	0.989345	8
mmu-miR-7048-3p	0.675019	0.058957	0.0780057	0.102116	3.4871	1.80203	0.0399031	0.989345	9
mmu-miR-7677-3p	0.682903	0	0.660972	0	5.3997	2.43288	0.0856039	0.989345	10
mmu-miR-669e-5p	0.0506883	0.527776	0.0877947	0.478956	-3.92461	-1.97255	0.0606508	0.989345	11
mmu-miR-463-5p	0	0.201619	0	0.175655	-4.06016	-2.02154	0.0729936	0.989345	12
mmu-miR-219a-5p	2.83113	10.4561	1.52665	5.16176	-3.76832	-1.91392	0.0713371	0.989345	13
mmu-miR-3091-5p	0	0.165887	0	0.147734	-3.61311	-1.85324	0.0624816	0.989345	14
mmu-miR-7655-3p	0.766789	0.071463	0.371094	0.123778	3.46202	1.79162	0.053321	0.989345	15
mmu-miR-183-3p	0.271584	1.29305	0.264748	0.951602	-3.92891	-1.97413	0.0828117	0.989345	16
mmu-miR-32-3p	1.07306	2.58686	1.1493	0.956819	-3.94782	-1.98106	0.093404	0.989345	17
mmu-miR-344d-2-5p	0.276056	0.905996	0.478143	0.855372	-5.54604	-2.47146	0.113872	0.989345	18
mmu-miR-7091-5p	1.13542	0.130156	0.817506	0.143026	4.01835	2.0066	0.104663	0.989345	19
mmu-miR-5619-5p	0.168728	0.567943	0.153112	0.0745356	-3.15262	-1.65655	0.0623836	0.989345	20
mmu-miR-5626-5p	0.3685	0	0.422379	0	3.63255	1.86098	0.102699	0.989345	21
mmu-miR-7213-3p	2.54623	0.589643	1.02149	0.390566	3.16943	1.66422	0.0782385	0.989345	22
mmu-miR-7652-5p	0.0440768	0.456674	0.0763432	0.427167	-3.18039	-1.6692	0.088563	0.989345	23
mmu-miR-3084-5p	0.899555	2.85622	0.530345	1.3441	-3.41659	-1.77256	0.103497	0.989345	24
mmu-miR-3069-5p	0.55543	1.38047	0.399131	0.934059	-2.99458	-1.58235	0.0719046	0.989345	25
mmu-miR-3100-5p	0.793392	0.143171	0.418472	0.157328	3.02563	1.59724	0.0972432	0.989345	26
mmu-miR-6997-3p	0.789971	0.494116	0.469141	0.855833	4.03055	2.01098	0.165085	0.989345	27
mmu-miR-196b-5p	0.0881536	0.510203	0.152686	0.444401	-3.40812	-1.76898	0.133652	0.989345	28
mmu-miR-187-5p	0.101377	0.759703	0.175589	0.820956	-3.12484	-1.64378	0.116635	0.989345	29
mmu-miR-181b-1-3p	2.57794	6.14976	0.728545	3.62722	-2.78048	-1.47533	0.0813574	0.989345	30
mmu-miR-1954	2.00997	5.37171	0.867751	3.61418	-2.89683	-1.53448	0.1039	0.989345	31
mmu-miR-7652-3p	0.997775	0.324691	0.183124	0.562381	2.96484	1.56795	0.107663	0.989345	32
mmu-miR-3079-3p	0.0460803	0.273082	0.0798134	0.268132	-2.84997	-1.51095	0.105159	0.989345	33
mmu-miR-5709-3p	0.355438	0	0.360246	0	3.25683	1.70347	0.149009	0.989345	34
mmu-miR-485-5p	1.01296	0.242989	0.837536	0.236599	2.93381	1.55277	0.135508	0.989345	35
mmu-miR-6939-3p	1.3583	0.900174	1.00331	1.46297	2.96235	1.56674	0.143583	0.989345	36
mmu-miR-1934-3p	0.843772	0.276995	0.253593	0.220326	2.91617	1.54408	0.142467	0.989345	37
mmu-miR-497a-3p	0.308266	1.52968	0.274934	0.778745	-4.85277	-2.27881	0.225259	0.989345	38
mmu-miR-6948-3p	2.08992	0.766298	1.26965	0.685498	2.54669	1.34863	0.0995757	0.989345	39
mmu-miR-6902-5p	0.152065	1.11491	0.263384	0.981612	-3.54629	-1.82631	0.196893	0.989345	40
mmu-miR-223-5p	0.184037	0.330593	0.318762	0.145743	-3.04736	-1.60756	0.172746	0.989345	41
mmu-miR-9-3p	5.29194	16.7913	1.93146	15.1356	-2.89629	-1.53421	0.159459	0.989345	42
mmu-miR-486a-5p	2.88558	1.55007	1.38099	1.80867	2.53471	1.34182	0.107503	0.989345	43
mmu-miR-6946-5p	0.417987	0.037433	0.202758	0.0648359	2.71478	1.44084	0.137583	0.989345	44
mmu-miR-486b-5p	2.75442	1.47962	1.31822	1.72646	2.53471	1.34182	0.107503	0.989345	45
mmu-miR-6967-3p	9.70729	9.64586	1.44645	13.1968	2.5794	1.36703	0.129847	0.989345	46
mmu-miR-193b-5p	0.506437	0.0187165	0.451677	0.0324179	2.92569	1.54878	0.176713	0.989345	47
mmu-miR-99a-3p	7.18529	14.1806	2.07431	4.01812	-2.29888	-1.20093	0.0812034	0.989345	48
mmu-miR-206-3p	76.7691	9.94224	104.743	6.67004	3.54791	1.82697	0.228465	0.989345	49
mmu-miR-3074-5p	4.00694	1.89505	1.98902	1.63864	2.41723	1.27336	0.106758	0.989345	50
mmu-miR-96-5p	26.3314	44.4698	24.3958	13.2819	-3.06903	-1.61778	0.210082	0.989345	51
mmu-miR-218-1-3p	0.299238	1.15745	0.278961	1.20596	-2.8131	-1.49216	0.179434	0.989345	52
mmu-miR-7035-3p	1.61984	0.0786093	2.29908	0.136155	3.11469	1.63909	0.21664	0.989345	53
mmu-miR-1b-3p	0.689771	1.43315	0.386559	0.531425	-2.40715	-1.26733	0.11633	0.989345	54
mmu-miR-185-3p	2.25511	0.604857	1.68519	0.526964	2.67347	1.41871	0.171335	0.989345	55
mmu-miR-215-5p	0.485122	0.951086	0.430533	0.602898	-2.69623	-1.43094	0.172996	0.989345	56
mmu-miR-181c-5p	17.8352	38.8875	3.40099	22.1465	-2.16648	-1.11535	0.049684	0.989345	57
mmu-miR-7118-3p	1.42576	0.867874	0.354028	1.13537	2.53645	1.34281	0.16626	0.989345	58
mmu-miR-101a-3p	409.006	826.594	243.579	283.662	-2.53122	-1.33984	0.16676	0.989345	59
mmu-miR-449a-5p	2.53804	2.68896	3.0909	1.14154	-2.66371	-1.41344	0.19277	0.989345	60
mmu-miR-7031-5p	0.377514	0.0187165	0.218272	0.0324179	2.64826	1.40505	0.190521	0.989345	61
mmu-miR-877-3p	13.4471	7.87648	3.95126	7.72795	2.1724	1.11929	0.0795301	0.989345	62
mmu-miR-184-3p	2.95403	1.19871	2.40002	1.23691	2.5847	1.37	0.193281	0.989345	63
mmu-miR-3069-3p	0.627569	1.14434	1.08698	1.1236	-3.18274	-1.67027	0.252029	0.989345	64
mmu-miR-449c-5p	0.0253441	0.182476	0.0438974	0.162507	-2.51642	-1.33137	0.180299	0.989345	65
mmu-miR-192-5p	180.054	332.206	89.9662	125.679	-2.17329	-1.11988	0.099518	0.989345	66
mmu-miR-7083-3p	3.65677	1.17682	3.16499	1.06392	2.96655	1.56878	0.241693	0.989345	67
mmu-miR-369-3p	1.40432	3.88479	0.939402	2.82366	-2.83836	-1.50506	0.238881	0.989345	68
mmu-miR-21b	1.61514	3.33195	0.398382	0.456986	-2.20336	-1.1397	0.122814	0.989345	69
mmu-miR-182-5p	110.54	176.612	89.3561	38.1136	-2.24916	-1.16939	0.158525	0.989345	70
mmu-miR-702-5p	0.453198	0.0413733	0.394566	0.0716607	2.2912	1.19611	0.172046	0.989345	71
mmu-miR-6996-5p	1.44225	0.538489	0.808259	0.568627	2.35929	1.23835	0.185652	0.989345	72
mmu-miR-190a-5p	160.155	156.294	230.967	76.6893	-3.48079	-1.79941	0.28788	0.989345	73
mmu-miR-21a-3p	35.4192	98.6417	13.9062	90.3961	-2.55933	-1.35577	0.233414	0.989345	74
mmu-miR-409-5p	5.37215	1.66183	5.72523	1.91645	2.47967	1.31015	0.226135	0.989345	75
mmu-miR-146a-3p	1.97659	3.16239	1.40006	2.25464	-2.7786	-1.47436	0.254836	0.989345	76
mmu-miR-224-5p	541.046	263.69	131.744	214.205	2.23534	1.1605	0.187929	0.989345	77
mmu-miR-665-3p	0.241373	0.687332	0.41807	0.371103	-3.05192	-1.60972	0.283964	0.989345	78
mmu-miR-543-3p	1.75514	0.39679	2.32135	0.36483	2.72342	1.44542	0.256625	0.989345	79
mmu-miR-491-3p	0.0482746	0.802492	0.083614	1.11104	-3.3067	-1.72539	0.302486	0.989345	80
mmu-miR-3572-3p	4.17191	2.18783	2.10323	1.6918	2.07657	1.0542	0.139351	0.989345	81
mmu-miR-194-2-3p	7.22542	2.43411	4.61964	0.91479	2.23299	1.15898	0.209077	0.989345	82
mmu-miR-34b-3p	151.233	68.2373	78.8577	31.546	2.04854	1.03459	0.129086	0.989345	83
mmu-miR-7018-3p	2.75413	0.935449	1.11022	0.382899	2.22324	1.15266	0.213121	0.989345	84
mmu-miR-6956-3p	1.21348	0.336897	1.01512	0.583523	2.73253	1.45024	0.278602	0.989345	85
mmu-miR-470-5p	0.79755	0.142926	0.512881	0.247555	2.82297	1.49721	0.2888	0.989345	86
mmu-miR-187-3p	11.946	24.7166	7.95518	15.5033	-2.07225	-1.0512	0.171499	0.989345	87
mmu-miR-6236	0.528379	0.0512669	0.528108	0.088797	2.33788	1.2252	0.247186	0.989345	88
mmu-miR-1931	0.467824	0.071463	0.312267	0.123778	2.22027	1.15074	0.231811	0.989345	89
mmu-miR-181c-3p	10.0322	23.3004	8.04978	20.4766	-2.07759	-1.05491	0.183574	0.989345	90
mmu-miR-7026-5p	0.288085	0.923339	0.244133	1.16167	-2.34128	-1.2273	0.254109	0.989345	91
mmu-miR-378d	0.253441	0	0.438974	0	2.43608	1.28456	0.26205	0.989345	92
mmu-miR-3108-5p	1.02878	1.84111	0.356344	0.322735	-2.06868	-1.04871	0.180826	0.989345	93
mmu-miR-181b-2-3p	0.434323	1.43189	0.522231	1.77825	-3.038	-1.60312	0.320617	0.989345	94
mmu-miR-107-5p	0.414297	1.32001	0.414084	1.42601	-2.4415	-1.28777	0.266311	0.989345	95
mmu-miR-7080-3p	1.22788	1.86617	1.24449	0.968945	-2.33743	-1.22492	0.257287	0.989345	96
mmu-miR-98-3p	4.27255	8.84989	1.55091	0.521625	-2.24031	-1.1637	0.252766	0.989345	97
mmu-miR-3101-5p	0.627124	1.36539	0.548	1.06775	-2.18892	-1.13022	0.237861	0.989345	98
mmu-miR-3066-5p	2.86878	4.95188	0.812471	0.867879	-1.95987	-0.970758	0.16549	0.989345	99
mmu-miR-200a-3p	2.77731	1.13197	1.11635	0.637298	2.05152	1.03669	0.193451	0.989345	100
mmu-miR-542-3p	130.419	261.698	68.741	206.341	-2.10097	-1.07105	0.22782	0.989345	101
mmu-miR-340-5p	130.982	202.223	101.156	44.2241	-2.28713	-1.19354	0.264855	0.989345	102
mmu-miR-183-5p	59.92	97.5021	29.1329	30.2275	-1.91532	-0.937584	0.136803	0.989345	103
mmu-miR-1198-5p	205.127	106.708	79.8944	69.7931	1.89842	0.924797	0.128642	0.989345	104
mmu-miR-32-5p	37.1863	56.2796	30.6867	8.00631	-2.19078	-1.13145	0.249585	0.989345	105
mmu-miR-3097-3p	2.22421	0.903631	0.159072	0.281464	2.0673	1.04774	0.21943	0.989345	106
mmu-miR-7054-5p	0.283929	0.86044	0.276782	0.966694	-2.14846	-1.1033	0.239906	0.989345	107
mmu-miR-1930-3p	0.337314	0.585809	0.235749	0.102688	-2.18697	-1.12894	0.248251	0.989345	108
mmu-miR-219c-5p	1.13726	0.507941	0.527698	0.379176	2.03047	1.02181	0.215678	0.989345	109
mmu-miR-6950-3p	0.359602	0.0854449	0.147039	0.147995	2.02634	1.01887	0.216357	0.989345	110
mmu-miR-148a-3p	1932.11	2828	1365.2	371.294	-2.06586	-1.04674	0.232322	0.989345	111
mmu-miR-33-3p	1.343	2.81687	1.20102	2.08067	-2.71977	-1.44349	0.332589	0.989345	112
mmu-miR-24-1-5p	0.211201	0.524202	0.365811	0.379266	-2.21357	-1.14638	0.274122	0.989345	113
mmu-miR-652-5p	2.28126	4.41691	1.73699	1.71986	-2.21282	-1.14588	0.270667	0.989345	114
mmu-miR-7079-3p	0.80528	0.307631	0.104529	0.268412	2.16786	1.11627	0.255161	0.989345	115
mmu-miR-362-3p	13.1133	23.2941	4.69092	5.36398	-1.98588	-0.989775	0.210924	0.989345	116
mmu-miR-7068-5p	0.120538	0.291424	0.150487	0.296906	-2.21305	-1.14604	0.279956	0.989345	117
mmu-miR-1943-5p	4.85638	1.93254	2.76796	1.05834	2.03729	1.02665	0.232876	0.989345	118
mmu-miR-194-5p	312.641	525.153	144.007	182.063	-1.92021	-0.941266	0.186115	0.989345	119
mmu-miR-3082-5p	0.289202	0.303564	0.500912	0.270175	-2.31781	-1.21276	0.30336	0.989345	120
mmu-miR-150-3p	1.13416	4.19692	1.4918	5.33613	-3.11024	-1.63703	0.361215	0.989345	121
mmu-miR-138-5p	539.949	918.472	106.899	340.388	-1.8262	-0.868848	0.156584	0.989345	122
mmu-miR-1306-5p	5.49167	3.15066	3.1583	3.40743	2.14991	1.10427	0.262458	0.989345	123
mmu-miR-301a-5p	5.73716	9.19847	3.37438	3.44207	-2.04712	-1.0336	0.242567	0.989345	124
mmu-miR-106b-5p	34.9305	57.5401	22.8148	13.9806	-2.22532	-1.15401	0.294817	0.989345	125
mmu-miR-23b-5p	31.2457	15.6729	8.60932	6.04339	1.82006	0.863984	0.143057	0.989345	126
mmu-miR-708-5p	0.437763	0.86147	0.758227	1.09249	-2.35959	-1.23854	0.319373	0.989345	127
mmu-miR-28a-3p	596.007	292.038	266.261	107.384	1.78935	0.839438	0.145088	0.989345	128
mmu-miR-365-2-5p	11.5519	4.67974	9.70478	3.69705	2.04253	1.03036	0.251242	0.989345	129
mmu-miR-142a-3p	0.4823	1.09887	0.44186	0.960798	-2.22894	-1.15636	0.305227	0.989345	130
mmu-miR-125b-5p	86880.2	48707.7	38116.7	28031.5	1.72978	0.790593	0.117578	0.989345	131
mmu-miR-466a-5p	0.391115	0.474701	0.618537	0.436093	-2.30859	-1.20701	0.324356	0.989345	132
mmu-miR-541-3p	0	0.071463	0	0.123778	-2.50744	-1.32621	0.346582	0.989345	133
mmu-miR-679-5p	1.18178	0.39696	0.802345	0.358399	2.46645	1.30244	0.344466	0.989345	134
mmu-miR-19b-3p	1518.73	2454.97	871.56	115.834	-2.07144	-1.05063	0.280198	0.989345	135
mmu-miR-30b-5p	737.391	1100.18	536.387	400.536	-2.08662	-1.06117	0.291417	0.989345	136
mmu-miR-3474	0.308402	0.034178	0.332799	0.059198	1.97677	0.983148	0.25304	0.989345	137
mmu-miR-466n-3p	0.461866	0.559208	0.432567	0.347631	-2.48069	-1.31074	0.350592	0.989345	138
mmu-miR-19a-3p	65.792	104.272	45.9678	10.7001	-2.20346	-1.13977	0.320715	0.989345	139
mmu-miR-20a-3p	3.82637	5.67449	2.50927	0.458359	-1.91967	-0.940856	0.243858	0.989345	140
mmu-miR-3076-3p	2.42785	1.17412	1.62031	0.793571	1.97101	0.978933	0.257368	0.989345	141
mmu-miR-7008-3p	0.631186	0.239246	0.400228	0.414386	2.11951	1.08373	0.309669	0.989345	142
mmu-miR-1231-3p	1.19752	3.0984	1.24679	3.74036	-2.14181	-1.09883	0.312738	0.989345	143
mmu-miR-30a-5p	3910.87	6202.07	775.62	2711.87	-1.71448	-0.777769	0.171367	0.989345	144
mmu-miR-8114	15.433	9.71335	10.4326	9.21434	1.84379	0.882674	0.237376	0.989345	145
mmu-miR-672-5p	468.893	234.793	235.757	136.406	1.90077	0.926587	0.252484	0.989345	146
mmu-miR-101b-5p	0.738979	1.39624	0.657895	1.50066	-2.03642	-1.02603	0.301158	0.989345	147
mmu-miR-503-3p	113.099	58.784	65.8492	40.6964	1.77922	0.831247	0.225515	0.989345	148
mmu-miR-3109-5p	0.128488	0.573794	0.163887	0.852133	-2.09899	-1.0697	0.322772	0.989345	149
mmu-miR-200c-3p	4.31672	2.58104	2.92584	2.30203	1.95424	0.966607	0.292288	0.989345	150
mmu-miR-30e-5p	1087.15	1729.92	371.919	554.187	-1.78163	-0.833199	0.239155	0.989345	151
mmu-miR-101b-3p	370.709	546.841	197.551	126.952	-1.78862	-0.838846	0.246692	0.989345	152
mmu-miR-5108	0	0.0357315	0	0.0618888	-2.0665	-1.04719	0.333858	0.989345	153
mmu-miR-669a-3-3p	0.867902	0.168449	1.04261	0.291761	1.97777	0.983873	0.317814	0.989345	154
mmu-miR-6980-3p	1.83379	1.19871	1.07103	1.23691	2.05744	1.04085	0.335887	0.989345	155
mmu-miR-465c-5p	3.08397	0.556355	3.33627	0.566821	2.42079	1.27548	0.405183	0.989345	156
mmu-miR-137-3p	0.306827	0.0535973	0.0354571	0.0928332	1.95547	0.967518	0.315465	0.989345	157
mmu-miR-467e-3p	0.4823	0.675192	0.44186	0.192871	-1.88978	-0.918219	0.29372	0.989345	158
mmu-miR-7213-5p	8.03174	2.92013	6.00361	1.37496	2.00521	1.00375	0.331746	0.989345	159
mmu-miR-6944-3p	23.7963	13.52	14.6885	9.83684	1.66764	0.737808	0.226926	0.989345	160
mmu-miR-24-2-5p	1.67136	2.83201	0.706027	0.661706	-1.94741	-0.961555	0.316673	0.989345	161
mmu-miR-7041-3p	0.345318	0.602492	0.300996	0.357156	-1.92188	-0.942517	0.308711	0.989345	162
mmu-miR-582-5p	15.6415	19.1483	12.1227	2.15322	-2.06929	-1.04914	0.349115	0.989345	163
mmu-miR-6940-3p	0.940314	0.616566	1.01984	0.824383	2.25899	1.17568	0.404401	0.989345	164
mmu-miR-376b-5p	0.736585	1.48811	0.671084	0.988102	-2.74725	-1.45799	0.448028	0.989345	165
mmu-miR-935	2.21703	0.585809	2.07344	0.102688	1.9742	0.98127	0.333478	0.989345	166
mmu-miR-299a-3p	1.54214	2.39373	1.83404	3.03756	-2.21284	-1.1459	0.396941	0.989345	167
mmu-miR-136-3p	2.84813	3.70989	3.71506	3.43385	-2.56181	-1.35716	0.445645	0.989345	168
mmu-miR-297b-5p	0.506042	1.28154	0.339902	0.607688	-2.48172	-1.31134	0.437499	0.989345	169
mmu-miR-29b-3p	2829.52	4651.55	1671.7	2967.11	-1.89854	-0.924889	0.320168	0.989345	170
mmu-miR-3058-5p	0.674902	0.939363	0.611324	0.222231	-1.8216	-0.865209	0.300734	0.989345	171
mmu-miR-1306-3p	12.5398	6.60155	5.00162	2.91809	1.73359	0.793767	0.278322	0.989345	172
mmu-miR-760-3p	1.22731	0.891076	0.141828	1.00246	1.91604	0.938125	0.332943	0.989345	173
mmu-miR-130a-5p	2.41845	4.14017	1.93504	2.77465	-1.92248	-0.942969	0.338034	0.989345	174
mmu-miR-6945-3p	1.70998	1.23578	0.990609	1.45256	1.99429	0.995872	0.350068	0.989345	175
mmu-miR-365-1-5p	0.304005	0.0471656	0.338698	0.0816932	1.82552	0.868309	0.310521	0.989345	176
mmu-miR-29c-3p	685.842	969.129	231.081	176.124	-1.6253	-0.700704	0.247814	0.989345	177
mmu-miR-6951-5p	0.0964006	0.112299	0.166971	0.194508	-2.00383	-1.00276	0.360319	0.989345	178
mmu-miR-27a-3p	1906.3	2675.54	196.418	474.826	-1.55427	-0.636234	0.21072	0.989345	179
mmu-miR-1966-3p	1.52771	1.08734	1.2575	1.34276	1.94114	0.956902	0.349153	0.989345	180
mmu-miR-365-3p	1944.45	1347.53	586.416	997.37	1.52777	0.611431	0.176953	0.989345	181
mmu-miR-1930-5p	1.05857	0.254034	1.28235	0.247353	1.956	0.967905	0.354977	0.989345	182
mmu-miR-129-1-3p	1.73177	8.4922	1.28362	12.2926	-2.19262	-1.13265	0.41955	0.989345	183
mmu-miR-3962	0.521754	0.328857	0.903705	0.301924	-2.34132	-1.22732	0.447249	0.989345	184
mmu-miR-598-3p	13.3095	22.8707	5.83209	14.1177	-1.78292	-0.834241	0.31531	0.989345	185
mmu-miR-3065-3p	0.388764	0.0683559	0.161848	0.118396	2.16276	1.11288	0.411308	0.989345	186
mmu-miR-669m-3p	0.230118	0.438969	0.287294	0.391111	-2.20636	-1.14167	0.428101	0.989345	187
mmu-miR-188-5p	8.39692	12.5291	2.95428	1.66463	-1.65438	-0.726291	0.271681	0.989345	188
mmu-miR-188-3p	1.57318	0.60877	1.1381	0.208837	1.88551	0.914958	0.345394	0.989345	189
mmu-miR-136-5p	1.02866	1.96657	1.29895	2.24935	-2.59937	-1.37816	0.478037	0.989345	190
mmu-miR-3098-3p	0.214666	0.619176	0.12656	0.770706	-1.93743	-0.954146	0.356812	0.989345	191
mmu-miR-344b-3p	2.87691	4.35069	1.90357	4.20261	-1.79712	-0.845686	0.328329	0.989345	192
mmu-miR-205-5p	5.15278	0.919133	7.04677	0.93245	2.18874	1.1301	0.432482	0.989345	193
mmu-miR-582-3p	125.834	166.19	73.5775	48.4544	-1.64543	-0.718466	0.282251	0.989345	194
mmu-miR-300-5p	0.783081	0.178658	0.920559	0.309444	2.01383	1.00994	0.402555	0.989345	195
mmu-miR-15a-5p	212.129	298.7	144.599	91.6701	-1.82321	-0.866479	0.347608	0.989345	196
mmu-miR-379-5p	32.5774	43.4406	42.1767	39.7901	-1.93972	-0.955848	0.380592	0.989345	197
mmu-miR-532-3p	53.6141	32.8972	28.5184	22.8147	1.57956	0.659522	0.256777	0.989345	198
mmu-miR-30c-5p	4851.56	7563.62	3229.74	5359.11	-1.85271	-0.889635	0.353782	0.989345	199
mmu-miR-505-3p	12.039	18.4699	3.15872	10.5631	-1.53911	-0.622099	0.241951	0.989345	200
mmu-miR-101c	1.16656	2.43653	0.787612	2.46392	-2.27943	-1.18867	0.467607	0.989345	201
mmu-miR-125a-5p	15607.2	9182.44	8816.45	6572.99	1.59608	0.674535	0.280806	0.989345	202
mmu-miR-1943-3p	1.2538	1.33167	1.30402	0.395362	-1.8529	-0.889781	0.361201	0.989345	203
mmu-miR-6516-5p	2.58153	2.72657	2.50265	1.01323	-1.7526	-0.809493	0.340729	0.989345	204
mmu-miR-18a-5p	79.0905	110.403	44.4207	11.9016	-1.76521	-0.819837	0.347609	0.989345	205
mmu-miR-1927	0.184179	0.331775	0.159504	0.295467	-1.76406	-0.818902	0.347632	0.989345	206
mmu-miR-378a-5p	57.8098	40.6845	23.662	35.9177	1.57986	0.659798	0.286339	0.989345	207
mmu-miR-675-5p	0.242422	2.27397	0.419888	3.76244	-2.40292	-1.26479	0.494303	0.989345	208
mmu-miR-21a-5p	54145.4	85610.3	29780.7	47896.9	-1.69044	-0.757401	0.328707	0.989345	209
mmu-miR-181d-5p	60.1358	83.097	5.7072	26.2608	-1.48087	-0.566441	0.219285	0.989345	210
mmu-miR-664-5p	27.6895	11.5718	22.8676	4.38184	1.71658	0.77954	0.343089	0.989345	211
mmu-miR-33-5p	1.51018	1.20987	2.1738	0.181501	-2.08272	-1.05847	0.450658	0.989345	212
mmu-miR-676-3p	50.6863	33.038	26.7403	27.4559	1.58789	0.667113	0.298037	0.989345	213
mmu-miR-101a-5p	0.613938	1.09779	0.622244	0.766483	-2.05977	-1.04248	0.448858	0.989345	214
mmu-miR-301a-3p	229.239	288.751	189.531	48.4189	-1.87329	-0.905575	0.402149	0.989345	215
mmu-miR-3077-3p	1.94126	1.09661	1.44857	1.19658	1.76707	0.821363	0.367266	0.989345	216
mmu-miR-219b-5p	0.176307	0.24412	0.305373	0.231869	-1.784	-0.835113	0.382296	0.989345	217
mmu-miR-27a-5p	433.257	127.573	492.683	16.2356	1.87649	0.908037	0.41292	0.989345	218
mmu-miR-25-5p	20.1553	14.6101	8.01155	12.606	1.55272	0.6348	0.300081	0.989345	219
mmu-miR-5134-5p	0.369712	0.131016	0.11939	0.226926	1.70455	0.769392	0.358557	0.989345	220
mmu-miR-466p-5p	0.276056	0.294861	0.478143	0.193721	-2.18416	-1.12708	0.490302	0.989345	221
mmu-let-7i-3p	40.3489	56.7354	7.15417	11.9592	-1.52784	-0.611494	0.289011	0.989345	222
mmu-miR-344-3p	29.366	45.32	8.37284	28.821	-1.5324	-0.615791	0.297961	0.989345	223
mmu-miR-7029-3p	0.391115	0.408333	0.618537	0.425879	-1.93059	-0.949038	0.44314	0.989345	224
mmu-miR-15b-3p	62.0547	88.5344	23.9299	29.5081	-1.56904	-0.649884	0.325994	0.989345	225
mmu-miR-6914-3p	4.70969	3.73667	2.28531	3.94637	1.59526	0.673795	0.339929	0.989345	226
mmu-miR-34c-3p	51.6521	26.1458	33.68	14.658	1.71175	0.775472	0.379049	0.989345	227
mmu-miR-7090-5p	0.286821	0.058957	0.0523754	0.102116	1.72561	0.787106	0.38256	0.989345	228
mmu-miR-701-3p	0.122648	0.242446	0.156437	0.291966	-1.8744	-0.906429	0.435394	0.989345	229
mmu-miR-1953	0.897431	0.22458	1.16086	0.300962	1.82823	0.870444	0.422967	0.989345	230
mmu-miR-10b-3p	580.501	760.271	203.922	62.6531	-1.52364	-0.607519	0.30419	0.989345	231
mmu-miR-19a-5p	0.498595	1.08738	0.193111	0.292302	-2.04536	-1.03235	0.481854	0.989345	232
mmu-miR-6964-3p	0.590756	1.12703	0.311312	0.559261	-1.65399	-0.725947	0.372718	0.989345	233
mmu-miR-452-5p	0.237848	0.768165	0.213979	1.06422	-1.95168	-0.964715	0.462237	0.989345	234
mmu-miR-3547-3p	0.401503	0.36629	0.348529	0.320266	-1.99415	-0.995771	0.471203	0.989345	235
mmu-miR-150-5p	290.606	776.835	247.704	1064.71	-1.78742	-0.837882	0.426697	0.989345	236
mmu-miR-30d-3p	19.6396	24.1794	13.1239	7.46475	-1.634	-0.708405	0.370839	0.989345	237
mmu-miR-672-3p	10.1711	6.16535	3.24953	1.30665	1.50219	0.58707	0.307593	0.989345	238
mmu-miR-376a-3p	0.414722	0.954712	0.71832	0.938401	-2.5572	-1.35456	0.564893	0.989345	239
mmu-miR-7030-3p	1.06925	0.562893	0.71644	0.307279	1.64506	0.718139	0.385101	0.989345	240
mmu-miR-92a-3p	1578.79	1127.75	397.008	741.638	1.44928	0.535336	0.275711	0.989345	241
mmu-miR-18a-3p	14.9784	11.0407	8.38153	10.1362	1.56498	0.646143	0.349522	0.989345	242
mmu-miR-19b-1-5p	3.78758	4.69645	1.99429	1.7769	-1.62983	-0.704722	0.38244	0.989345	243
mmu-miR-155-3p	0.659211	0.935985	0.392846	0.305176	-1.58771	-0.666946	0.360849	0.989345	244
mmu-miR-452-3p	2.2252	1.3582	0.823505	1.33601	1.75514	0.811582	0.436107	0.989345	245
mmu-miR-6946-3p	1.8721	1.05115	0.635513	0.916131	1.70652	0.77106	0.421052	0.989345	246
mmu-miR-298-3p	0.968478	1.89018	0.101381	1.64285	-1.57784	-0.657951	0.365875	0.989345	247
mmu-miR-1982-3p	1.20281	1.86414	1.06468	1.91604	-1.72212	-0.784189	0.435638	0.989345	248
mmu-miR-7068-3p	3.62164	2.61314	2.10606	2.46929	1.56427	0.645485	0.362569	0.989345	249
mmu-miR-92a-1-5p	61.319	38.3066	14.8539	6.9318	1.43164	0.517668	0.287333	0.989345	250
mmu-miR-7065-3p	0.368359	0.56403	0.319008	0.562775	-1.72465	-0.786306	0.438194	0.989345	251
mmu-miR-1193-5p	0.138241	0	0.23944	0	1.99958	0.999694	0.513905	0.989345	252
mmu-miR-181d-3p	0.759626	1.32886	0.70129	1.09682	-1.99924	-0.99945	0.513755	0.989345	253
mmu-miR-7682-3p	2.6697	1.31336	0.762652	0.406319	1.63337	0.707851	0.418198	0.989345	254
mmu-miR-346-5p	0.144824	0.266131	0.250842	0.259132	-1.61653	-0.6929	0.414442	0.989345	255
mmu-miR-139-5p	1572.09	1065.1	655.894	545.789	1.40208	0.487564	0.261649	0.989345	256
mmu-miR-344d-3p	424.355	216.684	349.624	151.991	1.61282	0.689585	0.412351	0.989345	257
mmu-miR-221-3p	4827.48	3042.83	1890.97	938.251	1.4325	0.51854	0.303108	0.989345	258
mmu-miR-466h-5p	12.0642	5.24134	8.69106	3.378	1.60177	0.679671	0.410776	0.989345	259
mmu-miR-574-3p	213.836	163.822	102.622	147.027	1.44969	0.535747	0.320706	0.989345	260
mmu-miR-3065-5p	1.11495	1.58936	0.289335	0.767521	-1.58938	-0.668462	0.410671	0.989345	261
mmu-miR-493-5p	1.22084	0.410912	1.65954	0.711721	1.82418	0.867249	0.486762	0.989345	262
mmu-miR-1941-5p	0.447484	0.197727	0.29869	0.299175	1.90639	0.930845	0.501269	0.989345	263
mmu-miR-3068-5p	69.7049	93.1118	4.53794	24.2531	-1.46606	-0.551947	0.336554	0.989345	264
mmu-miR-212-3p	7.20345	8.73302	5.54653	3.0152	-1.71232	-0.775949	0.452834	0.989345	265
mmu-miR-499-5p	0.421886	0.662367	0.126797	0.178628	-1.65017	-0.722611	0.4392	0.989345	266
mmu-miR-669f-5p	1.08539	1.07054	0.793545	0.518013	-1.65744	-0.728959	0.447054	0.989345	267
mmu-miR-423-5p	257.213	205.771	99.4935	192.981	1.44499	0.531063	0.321997	0.989345	268
mmu-miR-872-5p	348.68	459.668	100.16	148.934	-1.4726	-0.558362	0.34707	0.989345	269
mmu-miR-335-5p	1294.1	1875.23	372.799	815.461	-1.54053	-0.623423	0.386923	0.989345	270
mmu-miR-1843a-3p	46.7228	28.4218	31.5517	22.2724	1.54404	0.626713	0.396447	0.989345	271
mmu-miR-7027-3p	0.39154	0.071463	0.46028	0.123778	1.76771	0.821884	0.478854	0.989345	272
mmu-miR-1981-5p	132.965	99.9779	52.4282	86.4352	1.46123	0.547187	0.344749	0.989345	273
mmu-miR-543-5p	0.115201	0.260312	0.199533	0.286051	-1.85842	-0.894077	0.506229	0.989345	274
mmu-miR-3076-5p	0.560268	1.42602	0.472691	1.76498	-1.61202	-0.688869	0.436623	0.989345	275
mmu-miR-879-3p	1.36418	2.18789	0.349294	0.484027	-1.59516	-0.673702	0.434737	0.989345	276
mmu-miR-126a-5p	54780.5	67866.2	25589.5	12909	-1.46847	-0.554311	0.349294	0.989345	277
mmu-miR-199a-3p	5617.93	7618.03	4897.86	5440.15	-1.56754	-0.648499	0.428751	0.989345	278
mmu-miR-199b-3p	2679.25	3633.07	2336.18	2595.33	-1.56813	-0.649041	0.430949	0.989345	279
mmu-miR-7075-3p	4.29756	3.49419	2.20438	3.35654	1.52157	0.605558	0.392933	0.989345	280
mmu-let-7f-2-3p	7.0292	9.13414	4.71552	1.61615	-1.67487	-0.744051	0.470304	0.989345	281
mmu-miR-450a-5p	21.3372	28.6187	5.15237	11.3191	-1.50498	-0.58974	0.39141	0.989345	282
mmu-miR-412-5p	1.39981	0.336897	2.1789	0.583523	1.88472	0.914348	0.524193	0.989345	283
mmu-miR-351-3p	16.1039	15.8283	10.5684	20.7868	1.63076	0.705541	0.454819	0.989345	284
mmu-miR-351-5p	504.88	214.754	519.188	135.247	1.62309	0.698739	0.451716	0.989345	285
mmu-miR-298-5p	169.519	96.1814	102.048	35.1229	1.45226	0.538297	0.355602	0.989345	286
mmu-miR-465b-3p	5.9342	1.71262	5.4039	1.46552	1.82948	0.871435	0.52223	0.989345	287
mmu-miR-465c-3p	6.21679	1.79418	5.66123	1.53531	1.82948	0.871435	0.52223	0.989345	288
mmu-miR-138-2-3p	2.04767	1.13324	1.88033	1.50117	1.76074	0.81618	0.500199	0.989345	289
mmu-miR-7a-5p	1021.26	1423.84	667.479	910.98	-1.54552	-0.628091	0.431966	0.989345	290
mmu-miR-186-3p	8.8847	12.2434	1.53919	5.00202	-1.4498	-0.535849	0.367768	0.989345	291
mmu-miR-3081-3p	1.296	0.791189	0.592489	1.13394	1.63259	0.707159	0.473406	0.989345	292
mmu-miR-503-5p	44.6174	56.3915	8.53306	14.2908	-1.42424	-0.510188	0.352762	0.989345	293
mmu-miR-34a-3p	5.61603	6.87604	1.33437	3.13666	-1.48879	-0.574135	0.405357	0.989345	294
mmu-miR-376c-3p	1.90215	2.85267	2.59257	3.17649	-1.91408	-0.936653	0.552079	0.989345	295
mmu-miR-1945	4.84746	6.52793	2.80724	1.75481	-1.46107	-0.547024	0.389923	0.989345	296
mmu-miR-125b-2-3p	79.9954	108.55	30.5696	46.47	-1.4628	-0.548736	0.397423	0.989345	297
mmu-miR-451a	0.202441	0.117914	0.350638	0.204233	-1.70174	-0.767009	0.510562	0.989345	298
mmu-miR-16-5p	34770.7	42077	16295.8	8168.75	-1.43493	-0.520983	0.37841	0.989345	299
mmu-miR-28c	1.67968	0.89344	0.103576	0.291304	1.54119	0.624044	0.449967	0.989345	300
mmu-miR-5099	241.97	177.298	44.2078	101.494	1.41981	0.5057	0.368226	0.989345	301
mmu-miR-186-5p	473.63	615.953	106.001	230.224	-1.37459	-0.459004	0.33031	0.989345	302
mmu-miR-181b-5p	2288.58	979.607	2168.61	115.464	1.5479	0.630309	0.463339	0.989345	303
mmu-miR-5100	17.5821	12.4065	7.6316	9.5583	1.44545	0.531517	0.40065	0.989345	304
mmu-miR-26b-5p	3550.16	4653.41	651.229	1877.26	-1.41716	-0.502999	0.375123	0.989345	305
mmu-miR-673-5p	0.207361	0.290948	0.35916	0.29486	-1.83192	-0.873358	0.555451	0.989345	306
mmu-miR-3102-5p.2-5p	0.138099	0.289765	0.138028	0.257894	-1.73467	-0.794665	0.535006	0.989345	307
mmu-miR-378a-3p	510.021	307.733	225.265	104.542	1.46355	0.549475	0.420917	0.989345	308
mmu-miR-467d-5p	30.5701	21.6326	15.9236	14.2225	1.40225	0.487746	0.359331	0.989345	309
mmu-miR-127-5p	1.28359	1.78553	1.68626	2.33041	-1.77738	-0.829756	0.546757	0.989345	310
mmu-miR-350-5p	14.8686	9.43389	8.97575	4.5741	1.46202	0.547962	0.422312	0.989345	311
mmu-miR-7235-3p	6.11906	5.49879	2.93673	4.7434	1.47099	0.556792	0.437068	0.989345	312
mmu-miR-140-5p	77.0446	98.6478	17.1182	27.5266	-1.41189	-0.497628	0.382359	0.989345	313
mmu-miR-465a-3p	3.10839	0.897089	2.83062	0.767653	1.75156	0.808638	0.549352	0.989345	314
mmu-miR-341-3p	1.18258	1.18178	1.80364	1.17915	-1.75034	-0.807633	0.550525	0.989345	315
mmu-miR-6975-3p	4.02172	3.15279	2.25669	3.00069	1.4755	0.561202	0.446386	0.989345	316
mmu-miR-666-3p	0.0724119	0.149732	0.125421	0.259343	-1.66031	-0.731456	0.534809	0.989345	317
mmu-miR-218-5p	396.581	582.142	414.365	534.65	-1.67068	-0.740435	0.537083	0.989345	318
mmu-miR-9-5p	39.2497	64.3605	13.7423	61.9952	-1.48975	-0.575071	0.454912	0.989345	319
mmu-miR-6989-3p	11.1318	8.23784	2.78021	6.62217	1.47602	0.561711	0.447445	0.989345	320
mmu-miR-466b-5p	0.198074	0.256335	0.287723	0.443985	-1.60061	-0.678623	0.514314	0.989345	321
mmu-miR-92b-5p	1.0688	0.845263	0.87301	1.06309	1.56487	0.646046	0.50028	0.989345	322
mmu-miR-7689-3p	1.71153	1.80159	1.03843	2.4756	1.5369	0.62002	0.490075	0.989345	323
mmu-miR-411-3p	1.26294	0.89979	1.92275	0.386984	-1.70789	-0.772218	0.549558	0.989345	324
mmu-miR-6540-5p	45.6592	24.9104	33.5105	17.0307	1.49422	0.57939	0.468285	0.989345	325
mmu-miR-145b	0.207361	0.0178658	0.35916	0.0309444	1.57769	0.657814	0.511529	0.989345	326
mmu-miR-411-5p	24.3863	22.3785	33.7186	19.8466	-1.67613	-0.745133	0.550789	0.989345	327
mmu-miR-497b	0.337699	0.384575	0.366397	0.103239	-1.53683	-0.619961	0.497154	0.989345	328
mmu-miR-21c	29.2896	38.5974	15.4163	20.9141	-1.47992	-0.56552	0.470602	0.989345	329
mmu-miR-1191b-5p	0.184179	0.255216	0.159504	0.242409	-1.5463	-0.628824	0.510792	0.989345	330
mmu-miR-376b-3p	1.86622	1.99355	2.71085	1.37747	-1.7926	-0.842051	0.610559	0.989345	331
mmu-miR-7015-3p	4.15512	2.55946	2.84613	1.40415	1.45014	0.536196	0.455586	0.989345	332
mmu-miR-190b-3p	0.144824	0.173787	0.250842	0.154769	-1.50511	-0.589869	0.496747	0.989345	333
mmu-miR-27b-3p	7991.47	9511.16	915.225	2150.89	-1.31497	-0.395028	0.347698	0.989345	334
mmu-miR-6418-3p	2.44342	1.77056	1.69218	1.7418	1.49275	0.577973	0.493731	0.989345	335
mmu-miR-193a-5p	47.9416	29.8035	22.2187	8.83637	1.38993	0.475014	0.416732	0.989345	336
mmu-miR-16-2-3p	2.0399	3.18714	1.22982	1.37826	-1.55787	-0.639574	0.527855	0.989345	337
mmu-miR-3084-3p	4.32845	5.14625	3.16798	1.51562	-1.41443	-0.500225	0.446664	0.989345	338
mmu-miR-7688-5p	9.85086	5.75533	6.71711	2.47922	1.44903	0.535091	0.469896	0.989345	339
mmu-miR-3103-3p	0.418458	0.581171	0.375828	0.346139	-1.48526	-0.570719	0.497242	0.989345	340
mmu-miR-6539	1.5729	0.824341	1.13703	0.721353	1.55032	0.632568	0.53353	0.989345	341
mmu-miR-487b-3p	0.714102	0.196523	1.00729	0.340388	1.62447	0.69997	0.557333	0.989345	342
mmu-miR-135b-5p	0.429617	0.609952	0.374988	0.571513	-1.60315	-0.68091	0.555261	0.989345	343
mmu-let-7d-5p	4877.02	3033.79	2047.96	515.862	1.36846	0.452554	0.407619	0.989345	344
mmu-miR-125a-3p	65.77	43.0733	18.6164	10.0392	1.35851	0.442024	0.40303	0.989345	345
mmu-miR-210-5p	0.544817	1.02514	0.520418	1.25193	-1.55551	-0.63739	0.543178	0.989345	346
mmu-let-7b-5p	16963.3	12246.9	4622.4	5951.96	1.32121	0.40186	0.379982	0.989345	347
mmu-miR-466e-5p	0.115059	0.142926	0.143647	0.247555	-1.52102	-0.605044	0.521006	0.989345	348
mmu-miR-31-5p	2294.14	1536.21	886.559	810.077	1.39651	0.481827	0.440084	0.989345	349
mmu-miR-154-5p	6.51809	5.07057	7.78436	3.8707	-1.69516	-0.761424	0.606979	0.989345	350
mmu-miR-7083-5p	3.26008	3.06574	0.871614	3.33003	1.44194	0.528013	0.478439	0.989345	351
mmu-miR-350-3p	78.6279	96.7332	19.4271	23.9683	-1.35511	-0.438409	0.411415	0.989345	352
mmu-miR-190a-3p	0.735886	0.667463	0.938624	0.407608	-1.59429	-0.672914	0.562168	0.989345	353
mmu-miR-20a-5p	639.631	805.035	247.974	282.604	-1.41997	-0.505863	0.471605	0.989345	354
mmu-miR-375-3p	1.30178	0.449196	1.66743	0.77803	1.6461	0.719048	0.602676	0.989345	355
mmu-miR-151-3p	301.684	178.387	223.57	107.795	1.4078	0.493442	0.456069	0.989345	356
mmu-miR-190b-5p	24.2947	30.4745	10.2241	16.4136	-1.43536	-0.521416	0.489886	0.989345	357
mmu-miR-669b-3p	0.422012	0.131016	0.386628	0.226926	1.60438	0.682017	0.5869	0.989345	358
mmu-miR-93-3p	25.6228	20.0499	5.86868	13.8749	1.35265	0.43579	0.419251	0.989345	359
mmu-miR-204-5p	19.7784	13.889	14.3951	9.50269	1.40946	0.495145	0.464352	0.989345	360
mmu-miR-7093-3p	2.46803	2.00871	1.48808	1.87944	1.42929	0.5153	0.495899	0.989345	361
mmu-miR-326-3p	26.5434	42.6462	15.7594	39.6366	-1.38753	-0.472514	0.458568	0.989345	362
mmu-miR-671-3p	15.167	10.5409	5.37615	5.49403	1.35924	0.442797	0.441147	0.989345	363
mmu-miR-29a-5p	58.8405	72.1597	16.2588	5.40704	-1.3904	-0.475498	0.467315	0.989345	364
mmu-miR-1969	3.14099	1.80777	1.48294	1.15685	1.48183	0.567383	0.536671	0.989345	365
mmu-miR-26a-5p	19276	22292.2	1128.26	3408.93	-1.27852	-0.354475	0.380949	0.989345	366
mmu-miR-338-3p	231.736	385.665	162.746	377.1	-1.46453	-0.55044	0.527347	0.989345	367
mmu-miR-20b-5p	0.722654	0.57751	1.01126	0.500715	-1.56406	-0.645292	0.589661	0.989345	368
mmu-miR-125b-1-3p	248.919	165.464	111.163	82.6195	1.38057	0.465264	0.461091	0.989345	369
mmu-miR-5121	6.19116	4.66054	3.16101	3.63807	1.39901	0.484405	0.48518	0.989345	370
mmu-miR-1843b-3p	26.1505	16.6321	19.4952	12.9539	1.41331	0.499078	0.497114	0.989345	371
mmu-miR-99b-3p	163.248	96.4388	92.8041	32.1054	1.38505	0.469938	0.472663	0.989345	372
mmu-miR-6954-3p	0.313488	0.074866	0.292245	0.129672	1.51349	0.597882	0.556956	0.989345	373
mmu-miR-374c-5p	0.613512	0.312727	0.207179	0.168603	1.59079	0.669747	0.619439	0.989345	374
mmu-miR-872-3p	73.5739	94.7795	36.3029	51.6474	-1.38774	-0.472737	0.489705	0.989345	375
mmu-miR-330-5p	7.99041	8.87855	3.25653	3.51653	-1.39314	-0.478339	0.492637	0.989345	376
mmu-miR-337-3p	1.29727	1.76001	1.2982	1.07622	-1.61396	-0.690609	0.646956	0.989345	377
mmu-miR-874-3p	20.4985	25.0754	9.30672	6.22179	-1.38178	-0.466532	0.487671	0.989345	378
mmu-miR-3079-5p	1.864	1.07838	0.250864	0.558914	1.42875	0.514749	0.527121	0.989345	379
mmu-miR-132-5p	26.7557	34.0819	14.3301	17.8429	-1.39366	-0.47888	0.499032	0.989345	380
mmu-miR-323-3p	3.25456	1.75947	3.97395	1.10925	1.48959	0.574919	0.569784	0.989345	381
mmu-miR-504-5p	10.6436	24.0192	6.76702	37.0126	1.50147	0.586373	0.587125	0.989345	382
mmu-miR-6516-3p	0.39642	1.08198	0.349695	1.53263	-1.48212	-0.567663	0.569693	0.989345	383
mmu-miR-501-3p	103.741	65.9034	75.2094	41.4915	1.35659	0.43999	0.475847	0.989345	384
mmu-miR-132-3p	223.092	255.033	185.139	212.341	-1.47906	-0.564679	0.56414	0.989345	385
mmu-miR-16-1-3p	6.05324	8.14078	3.18747	2.36415	-1.44528	-0.531346	0.5465	0.989345	386
mmu-miR-3970	16.3512	15.9252	12.8756	12.2994	-1.52386	-0.60773	0.605468	0.989345	387
mmu-miR-500-5p	1.64863	1.00552	1.0433	1.15444	1.50234	0.587213	0.601854	0.989345	388
mmu-miR-191-5p	4160.88	3255.86	1635.06	2217.19	1.28587	0.362744	0.440343	0.989345	389
mmu-miR-380-3p	0.286499	0.362612	0.496231	0.32202	-1.65612	-0.727809	0.681157	0.989345	390
mmu-miR-6986-5p	0.552538	0.254034	0.478512	0.247353	1.49063	0.575918	0.599991	0.989345	391
mmu-miR-154-3p	0.217236	0.21122	0.376263	0.184019	-1.48852	-0.573883	0.594193	0.989345	392
mmu-miR-152-3p	1170.96	1404.87	76.6154	468.847	-1.30088	-0.379493	0.452339	0.989345	393
mmu-miR-124-5p	0.289202	0	0.500912	0	1.55489	0.636817	0.641194	0.989345	394
mmu-miR-653-5p	0.0724119	0.0935825	0.125421	0.16209	-1.4024	-0.487899	0.526716	0.989345	395
mmu-miR-99a-5p	1538.74	2174.33	754.608	1549.74	-1.3427	-0.425136	0.489813	0.989345	396
mmu-miR-139-3p	102.527	65.155	58.1063	35.6555	1.38075	0.465453	0.513606	0.989345	397
mmu-miR-3082-3p	0.585779	0.623514	0.481227	0.65841	-1.52299	-0.606904	0.623517	0.989345	398
mmu-miR-297a-3p	13.4852	17.2611	1.49251	3.90948	-1.33979	-0.422007	0.496289	0.989345	399
mmu-miR-212-5p	9.11567	12.7483	6.29235	9.20254	-1.37772	-0.462286	0.524411	0.989345	400
mmu-miR-3064-3p	0.476917	0.705668	0.184715	0.307546	-1.41435	-0.500136	0.553407	0.989345	401
mmu-miR-669d-5p	8.69322	9.97675	2.64182	2.61693	-1.35107	-0.434106	0.502056	0.989345	402
mmu-miR-500-3p	26.7006	30.3168	10.0603	8.94771	-1.27554	-0.351112	0.453024	0.989345	403
mmu-miR-674-3p	91.012	76.0896	47.2732	72.0985	1.31976	0.400274	0.496443	0.989345	404
mmu-miR-10a-3p	238.268	270.315	81.4375	49.1614	-1.2776	-0.353434	0.466922	0.989345	405
mmu-miR-5113	2.10128	1.14474	0.654568	0.837962	1.39527	0.480545	0.547321	0.989345	406
mmu-miR-669f-3p	4.99962	6.3157	3.30901	3.04981	-1.38287	-0.46767	0.546976	0.989345	407
mmu-let-7k	14.9975	7.54451	12.5682	3.44985	1.37763	0.462191	0.544972	0.989345	408
mmu-miR-450a-1-3p	3.11391	3.32703	1.60934	2.33278	-1.37957	-0.46422	0.545693	0.989345	409
mmu-miR-1955-5p	0.927786	0.677869	0.387153	0.69674	1.41217	0.497914	0.582283	0.989345	410
mmu-miR-877-5p	11.5674	14.7568	1.09537	18.4586	1.35833	0.441833	0.528393	0.989345	411
mmu-miR-5106	0.927918	0.330593	1.10903	0.145743	1.41892	0.50479	0.594925	0.989345	412
mmu-let-7a-1-3p	75.1653	82.0266	43.5139	3.02675	-1.36906	-0.453182	0.545469	0.989345	413
mmu-miR-199a-5p	657.366	1166.44	693.168	1416.82	-1.44881	-0.534865	0.618472	0.989345	414
mmu-miR-6481	0.138099	0.0178658	0.138028	0.0309444	1.41366	0.499433	0.593428	0.989345	415
mmu-let-7c-2-3p	71.7487	78.2854	41.536	2.98075	-1.36854	-0.452643	0.546009	0.989345	416
mmu-miR-99b-5p	6225.13	5056.52	3156.61	4351.41	1.29096	0.368441	0.499012	0.989345	417
mmu-miR-130b-5p	61.1271	61.92	14.5542	61.4803	1.32882	0.410145	0.528282	0.989345	418
mmu-miR-135a-5p	4.23071	5.43082	5.66769	6.01599	-1.52712	-0.610812	0.680587	0.989345	419
mmu-miR-106b-3p	275.956	232.607	124.74	206.987	1.30231	0.381076	0.516721	0.989345	420
mmu-miR-496a-3p	1.6433	1.0134	2.5918	0.743038	-1.5032	-0.588041	0.67513	0.989345	421
mmu-miR-382-3p	1.85796	1.23783	2.46668	1.90394	1.50057	0.585508	0.673073	0.989345	422
mmu-miR-299b-5p	0.875383	0.307631	1.28457	0.268412	1.42229	0.50822	0.634293	0.989345	423
mmu-miR-423-3p	212.671	148.769	117.271	96.2601	1.30592	0.385069	0.530335	0.989345	424
mmu-miR-5709-5p	0.283787	0.398142	0.0130233	0.466311	-1.3855	-0.470411	0.593822	0.989345	425
mmu-miR-342-3p	1283.05	1266.55	566.109	1339.27	1.28464	0.361367	0.516257	0.989345	426
mmu-miR-540-3p	2.18839	0.905028	3.10095	0.793652	1.45698	0.542982	0.661095	0.989345	427
mmu-miR-141-3p	0.613267	0.651718	0.600679	0.369986	-1.47507	-0.560781	0.670773	0.989345	428
mmu-miR-297b-3p	7.06368	9.04154	0.78179	2.04782	-1.3154	-0.395498	0.547035	0.989345	429
mmu-miR-297c-3p	7.80723	9.99328	0.864083	2.26339	-1.3154	-0.395498	0.547035	0.989345	430
mmu-miR-1668	1.45812	1.52812	1.074	1.7642	1.40344	0.488972	0.624778	0.989345	431
mmu-miR-501-5p	12.536	8.97825	5.55906	4.99853	1.2798	0.355921	0.525882	0.989345	432
mmu-miR-146b-5p	36.8752	41.6135	6.73314	7.80336	-1.27075	-0.345677	0.515534	0.989345	433
mmu-miR-1198-3p	0.360354	0.520624	0.208351	0.572103	-1.39855	-0.48393	0.62253	0.989345	434
mmu-miR-466h-3p	0.766921	0.657272	0.770612	0.222831	-1.36585	-0.449801	0.590909	0.989345	435
mmu-miR-26a-1-3p	8.40377	8.35657	6.34946	0.646065	-1.34065	-0.422929	0.583853	0.989345	436
mmu-miR-15a-3p	0.882273	1.89326	0.774738	2.29592	-1.53525	-0.618474	0.745268	0.989345	437
mmu-miR-6988-3p	8.79045	6.89148	4.1831	5.54213	1.31412	0.394101	0.553733	0.989345	438
mmu-miR-222-3p	597.326	435.543	250.764	157.306	1.26163	0.335285	0.514864	0.989345	439
mmu-let-7g-3p	3.45667	4.92413	1.47291	2.69643	-1.32857	-0.409874	0.56699	0.989345	440
mmu-miR-31-3p	46.377	51.7858	42.2544	40.1034	-1.41479	-0.500583	0.65531	0.989345	441
mmu-miR-1934-5p	4.93968	4.8379	2.70698	4.81636	1.33385	0.415593	0.585777	0.989345	442
mmu-miR-338-5p	5.61632	4.72958	3.25708	4.03724	1.3308	0.41229	0.586619	0.989345	443
mmu-miR-138-1-3p	16.3222	24.603	6.40984	21.0974	-1.29657	-0.374701	0.553032	0.989345	444
mmu-miR-377-5p	0.189951	0.0491308	0.167562	0.0850971	1.4097	0.495385	0.652972	0.989345	445
mmu-miR-126a-3p	268188	293324	76120.1	17649.4	-1.2416	-0.312206	0.507931	0.989345	446
mmu-miR-322-3p	194.21	140.946	73.4754	53.7642	1.24486	0.315979	0.51308	0.989345	447
mmu-miR-1839-3p	3.73575	6.5451	2.04418	6.77458	-1.36722	-0.451244	0.616426	0.989345	448
mmu-miR-10b-5p	22924.7	26531.5	3315.17	8949.55	-1.22829	-0.296654	0.503019	0.989345	449
mmu-miR-130a-3p	714.525	814.318	139.754	80.0862	-1.26216	-0.335897	0.532245	0.989345	450
mmu-miR-331-3p	36.8592	53.3598	12.3709	46.6515	-1.26451	-0.338577	0.539001	0.989345	451
mmu-miR-495-3p	1.01287	0.734598	0.624637	0.713434	1.37693	0.46146	0.634816	0.989345	452
mmu-miR-758-3p	0.253441	0.0357315	0.438974	0.0618888	1.42754	0.513528	0.682667	0.989345	453
mmu-miR-1188-5p	0.645124	0.107195	1.11739	0.185666	1.40655	0.492156	0.665925	0.989345	454
mmu-miR-301b-5p	1.01208	1.1398	0.679805	0.339244	-1.34098	-0.423285	0.613767	0.989345	455
mmu-miR-23a-5p	6.12554	2.19743	6.37386	0.772312	1.4131	0.498867	0.670641	0.989345	456
mmu-miR-376a-5p	0.460803	0.39696	0.798134	0.358399	-1.46113	-0.54708	0.717107	0.989345	457
mmu-miR-301b-3p	23.9312	27.2451	7.79032	7.97269	-1.27944	-0.355513	0.555761	0.989345	458
mmu-miR-193a-3p	0.552264	0.56403	0.483095	0.562775	-1.39116	-0.476289	0.665376	0.989345	459
mmu-miR-7036b-5p	0.0440768	0.107408	0.0763432	0.143938	-1.41859	-0.504453	0.687633	0.989345	460
mmu-miR-320-3p	329.019	282.565	46.1919	184.302	1.22546	0.293319	0.515844	0.989345	461
mmu-miR-466m-3p	1.47576	0.582302	1.42458	0.199757	1.38195	0.466703	0.660939	0.989345	462
mmu-miR-377-3p	1.05956	0.996721	1.38487	0.808623	-1.52582	-0.609589	0.789667	0.989345	463
mmu-miR-29b-1-5p	41.8445	28.7015	15.7845	7.37808	1.26413	0.338144	0.554834	0.989345	464
mmu-miR-3068-3p	14.2846	15.7193	0.536299	2.82561	-1.24336	-0.314242	0.5437	0.989345	465
mmu-miR-744-3p	4.2517	7.33799	1.74702	6.65519	-1.3042	-0.383167	0.615814	0.989345	466
mmu-miR-450b-5p	17.7449	19.0532	8.48717	4.1446	-1.29213	-0.369747	0.606173	0.989345	467
mmu-miR-1955-3p	1.34954	0.83866	0.943135	0.604394	1.33144	0.412983	0.649598	0.989345	468
mmu-miR-324-5p	68.0541	85.363	36.0138	54.5807	-1.25925	-0.33256	0.581116	0.989345	469
mmu-miR-450a-2-3p	1.93298	2.54476	0.140339	3.58603	1.38543	0.470335	0.687691	0.989345	470
mmu-miR-344c-3p	3.36705	3.71391	1.78032	0.905728	-1.30812	-0.387498	0.638598	0.989345	471
mmu-miR-1929-5p	0.128488	0.112299	0.163887	0.194508	-1.36845	-0.452539	0.674003	0.989345	472
mmu-miR-6921-3p	0.115201	0.0178658	0.199533	0.0309444	1.30157	0.380258	0.637669	0.989345	473
mmu-miR-704	1.52683	1.21155	0.248219	0.751772	1.28044	0.356641	0.619473	0.989345	474
mmu-miR-540-5p	0.240102	0.280727	0.41587	0.338066	-1.42506	-0.511026	0.756665	0.989345	475
mmu-miR-3087-3p	0.429617	0.165887	0.374988	0.147734	1.34028	0.422537	0.668102	0.989345	476
mmu-miR-3072-3p	0.13223	0.017089	0.22903	0.029599	1.36879	0.452905	0.688156	0.989345	477
mmu-miR-669c-5p	201.957	111.46	174.245	13.7254	1.2762	0.351856	0.625678	0.989345	478
mmu-miR-741-3p	1.28827	1.25955	1.05631	0.910325	-1.32984	-0.411248	0.670322	0.989345	479
mmu-miR-7060-3p	0.506316	0.165887	0.557781	0.147734	1.37282	0.457146	0.709445	0.989345	480
mmu-miR-431-5p	29.8161	20.6873	36.9924	12.0519	-1.35298	-0.436137	0.685768	0.989345	481
mmu-miR-3062-5p	1.79457	1.87283	1.30456	2.01502	1.35457	0.437831	0.694887	0.989345	482
mmu-miR-185-5p	165.775	182.255	33.7568	54.8747	-1.21382	-0.279559	0.556245	0.989345	483
mmu-miR-483-5p	0.836193	2.52026	0.726564	3.82178	-1.4184	-0.504265	0.777008	0.989345	484
mmu-miR-1938	0.0724119	0.074866	0.125421	0.129672	-1.29216	-0.369785	0.653884	0.989345	485
mmu-miR-30e-3p	226.23	258.56	44.5448	101.571	-1.19796	-0.260574	0.547499	0.989345	486
mmu-miR-331-5p	1.63943	1.9067	0.684394	0.289718	-1.26542	-0.339611	0.634856	0.989345	487
mmu-let-7a-5p	51987.5	35205.2	24706.5	7552.35	1.23468	0.304135	0.598198	0.989345	488
mmu-miR-339-3p	7.35464	9.05187	2.88808	5.40978	-1.23348	-0.302733	0.599535	0.989345	489
mmu-miR-1291	6.54313	7.39159	2.09837	8.15875	1.26612	0.34041	0.644604	0.989345	490
mmu-miR-675-3p	2.26468	6.63006	2.94859	10.1231	-1.41048	-0.496188	0.776608	0.989345	491
mmu-miR-3099-3p	1.62393	1.1688	0.410633	0.511416	1.29732	0.375537	0.672668	0.989345	492
mmu-miR-1843a-5p	74.5412	76.9572	42.2537	31.0446	-1.24114	-0.31167	0.615863	0.989345	493
mmu-miR-421-3p	33.68	36.5149	5.2381	7.82662	-1.21286	-0.278412	0.584991	0.989345	494
mmu-miR-3102-3p	4.465	4.3823	1.28872	3.48384	1.27248	0.347645	0.657505	0.989345	495
mmu-miR-330-3p	6.03111	6.12454	1.82152	4.72024	1.24653	0.317915	0.626345	0.989345	496
mmu-miR-149-5p	7.15816	6.35002	8.52327	4.68805	-1.31932	-0.399793	0.70152	0.989345	497
mmu-miR-335-3p	462.274	456.114	126.41	467.852	1.31467	0.394704	0.693592	0.989345	498
mmu-miR-1961	0.133226	0.103433	0.166328	0.179152	-1.29336	-0.371124	0.677536	0.989345	499
mmu-miR-203-3p	46.846	32.01	26.894	13.8803	1.26446	0.338519	0.650542	0.989345	500
mmu-let-7j	6.00419	6.06046	2.69933	3.33586	-1.27238	-0.347528	0.665464	0.989345	501
mmu-let-7f-5p	49315.9	53874.4	20813	22535.5	-1.24723	-0.318722	0.641047	0.989345	502
mmu-miR-6934-5p	0.38164	0.523899	0.185127	0.778034	1.29588	0.373935	0.682538	0.989345	503
mmu-miR-122-5p	30.069	19.9401	20.8518	8.54521	1.2192	0.28593	0.611353	0.989345	504
mmu-miR-328-3p	163.946	150.515	84.8374	147.109	1.22284	0.290241	0.619244	0.989345	505
mmu-miR-434-5p	14.9026	12.5164	19.3427	9.11044	-1.31988	-0.400406	0.727368	0.989345	506
mmu-miR-340-3p	11.2678	12.1843	2.12356	2.82796	-1.22363	-0.291164	0.621188	0.989345	507
mmu-miR-34b-5p	32.4234	37.3193	9.36275	18.0276	-1.24575	-0.317019	0.649923	0.989345	508
mmu-miR-702-3p	2.50013	1.8534	0.763687	0.96969	1.24477	0.315875	0.647147	0.989345	509
mmu-miR-431-3p	0.217236	0.205882	0.376263	0.356597	-1.31985	-0.400377	0.728564	0.989345	510
mmu-miR-5119	1.52566	1.08224	0.653319	0.427736	1.26322	0.337105	0.667262	0.989345	511
mmu-miR-29a-3p	18617.8	19217.6	4925.46	2087.19	-1.16803	-0.224081	0.556168	0.989345	512
mmu-miR-17-5p	275.547	307.354	136.473	122.214	-1.24136	-0.311918	0.650465	0.989345	513
mmu-miR-7a-1-3p	15.8081	16.8188	7.60284	4.01887	-1.24545	-0.316663	0.662643	0.989345	514
mmu-miR-7091-3p	0.758785	0.514346	0.89626	0.0455865	-1.31095	-0.390611	0.733248	0.989345	515
mmu-miR-214-5p	10.5141	15.7805	11.3073	17.887	-1.28258	-0.359046	0.709487	0.989345	516
mmu-miR-6958-3p	0.894833	0.667747	0.839956	0.175542	-1.29132	-0.368846	0.712536	0.989345	517
mmu-miR-1983	199.437	136.402	112.126	36.0893	1.19512	0.25715	0.609589	0.989345	518
mmu-miR-148b-3p	1841.05	1903.37	667.542	492.137	-1.16756	-0.223492	0.583303	0.989345	519
mmu-miR-181a-5p	5841.95	2736.13	6424.33	973.509	1.27092	0.345873	0.706185	0.989345	520
mmu-miR-296-5p	147.214	147.585	76.8606	152.721	1.21344	0.279101	0.648866	0.989345	521
mmu-miR-370-3p	0.747662	0.494829	0.648456	0.519151	1.2798	0.35592	0.735066	0.989345	522
mmu-miR-6984-3p	0.23026	1.03652	0.21112	0.991764	-1.333	-0.414678	0.787964	0.989345	523
mmu-miR-378b	3.63987	5.07901	0.204831	3.71968	-1.22181	-0.289025	0.666066	0.989345	524
mmu-miR-466d-3p	18.8652	19.6682	7.18083	2.20892	-1.18885	-0.249563	0.629254	0.989345	525
mmu-miR-669h-5p	0.594601	0.403723	0.0272868	0.349842	1.25861	0.331833	0.709488	0.989345	526
mmu-miR-1843b-5p	47.0736	48.4504	25.3054	20.6643	-1.22192	-0.289155	0.668258	0.989345	527
mmu-let-7e-3p	60.9374	54.4859	27.0499	42.1061	1.18559	0.245608	0.627288	0.989345	528
mmu-miR-7661-3p	1.84973	1.2343	1.60718	0.621273	-1.27015	-0.344996	0.734401	0.989345	529
mmu-miR-30a-3p	965.833	1033.66	122.093	141.203	-1.17744	-0.235652	0.625612	0.989345	530
mmu-miR-455-5p	20.9324	28.8458	12.7884	32.6933	-1.25026	-0.322223	0.711851	0.989345	531
mmu-miR-1981-3p	36.1349	34.0134	13.4724	29.2491	1.19421	0.256052	0.645266	0.989345	532
mmu-miR-8103	5.59518	7.78821	2.06185	9.28377	1.25171	0.323898	0.71292	0.989345	533
mmu-miR-425-5p	788.681	651.355	154.821	273.694	1.16848	0.224637	0.62072	0.989345	534
mmu-miR-361-5p	890.711	730.266	232.077	302.797	1.15785	0.211454	0.613593	0.989345	535
mmu-miR-873a-5p	0.506103	0.117914	0.876596	0.204233	-1.29338	-0.371144	0.771998	0.989345	536
mmu-miR-7046-3p	0.330305	0.456674	0.287909	0.427167	-1.26549	-0.339698	0.735334	0.989345	537
mmu-let-7e-5p	12930.8	9526.3	4413.28	1310.21	1.1768	0.234867	0.627391	0.989345	538
mmu-miR-1a-3p	6.2946	9.17201	1.6486	7.21504	-1.25794	-0.331069	0.727325	0.989345	539
mmu-miR-3094-5p	0.32242	0.330593	0.347927	0.145743	-1.23984	-0.310152	0.701662	0.989345	540
mmu-miR-3963	1114.4	913.558	791.745	683.553	1.18831	0.248909	0.64742	0.989345	541
mmu-miR-1190	0.434471	0.438679	0.752526	0.535409	-1.29858	-0.376937	0.783071	0.989345	542
mmu-miR-6540-3p	6.28364	7.35278	3.51792	4.18042	-1.20921	-0.274061	0.666602	0.989345	543
mmu-miR-30c-1-3p	8.67419	9.01245	1.0474	2.09087	-1.18817	-0.248745	0.649213	0.989345	544
mmu-miR-145a-5p	190.521	68.8166	292.517	76.6646	1.35519	0.438492	0.831565	0.989345	545
mmu-miR-3572-5p	0.308266	0.153801	0.274934	0.266391	1.23949	0.309743	0.716176	0.989345	546
mmu-miR-6919-5p	0.414439	0.495298	0.36559	0.42828	-1.23837	-0.308445	0.721338	0.989345	547
mmu-miR-98-5p	635.152	665.713	289.739	285.399	-1.21278	-0.278321	0.687073	0.989345	548
mmu-miR-3089-3p	0.352614	0.277167	0.610746	0.246681	-1.26457	-0.338649	0.772557	0.989345	549
mmu-miR-484	102.125	77.4179	54.4973	37.0179	1.17055	0.227183	0.65324	0.989345	550
mmu-miR-3061-3p	1.14358	1.95195	0.985277	2.20147	-1.23345	-0.302698	0.732748	0.989345	551
mmu-miR-410-5p	0.337699	0.468889	0.366397	0.472677	-1.29299	-0.370715	0.798536	0.989345	552
mmu-miR-3535	72.5581	75.68	11.0818	13.5715	-1.16485	-0.220147	0.651527	0.989345	553
mmu-miR-6546-3p	0.184321	0.148022	0.319253	0.142068	-1.24529	-0.31648	0.752365	0.989345	554
mmu-miR-3064-5p	5.43844	4.23392	1.65418	1.89638	1.18947	0.250324	0.675389	0.989345	555
mmu-let-7i-5p	13615.2	14413.3	3378.62	4650.59	-1.17871	-0.237209	0.673314	0.989345	556
mmu-miR-676-5p	2.56953	3.82692	0.185285	2.80368	-1.20484	-0.268836	0.705267	0.989345	557
mmu-miR-195a-3p	13.7458	8.72015	9.57433	6.26187	1.21117	0.276407	0.716006	0.989345	558
mmu-miR-7658-5p	0.55569	0.405976	0.309555	0.142756	1.21808	0.284611	0.734236	0.989345	559
mmu-miR-5615-5p	0.590898	0.428778	0.587553	0.742665	1.24821	0.319866	0.782612	0.989345	560
mmu-miR-494-3p	9.16438	5.70805	13.6658	4.09484	-1.25864	-0.331862	0.787225	0.989345	561
mmu-miR-669o-5p	2.29318	2.11844	1.36111	1.07007	-1.21101	-0.276205	0.732567	0.989345	562
mmu-miR-7021-5p	0.843192	0.385007	0.897183	0.33381	1.24688	0.318318	0.785733	0.989345	563
mmu-miR-491-5p	8.61454	8.28599	8.53596	6.9501	-1.21337	-0.279019	0.74606	0.989345	564
mmu-miR-7117-3p	1.23102	1.54939	1.05219	1.81593	1.22694	0.295062	0.771645	0.989345	565
mmu-miR-6900-3p	2.19369	2.04614	0.371237	1.85902	1.2103	0.275365	0.73864	0.989345	566
mmu-miR-3058-3p	0.535502	0.439585	0.451077	0.445954	1.22304	0.290476	0.76734	0.989345	567
mmu-miR-5126	1.36499	2.37772	0.652859	1.63651	-1.26569	-0.339923	0.812192	0.989345	568
mmu-let-7c-5p	66271.3	51816.3	14797.8	8437.86	1.14352	0.19348	0.669114	0.989345	569
mmu-miR-744-5p	120.174	120.46	41.5224	109.815	1.15888	0.212732	0.683983	0.989345	570
mmu-let-7g-5p	2649.29	2783.35	524.743	845.292	-1.1636	-0.218595	0.687938	0.989345	571
mmu-miR-466c-5p	2.81714	2.6731	1.68185	2.43597	1.26362	0.337559	0.814482	0.989345	572
mmu-miR-677-3p	0.790103	0.548895	0.54747	0.383241	1.20984	0.274816	0.763673	0.989345	573
mmu-miR-324-3p	72.8896	65.7991	46.1625	61.4431	1.16886	0.225101	0.712432	0.989345	574
mmu-miR-17-3p	120.368	125.279	32.0476	38.322	-1.13397	-0.181386	0.672559	0.989345	575
mmu-miR-1948-3p	0.458311	0.462734	0.411621	0.510234	1.22578	0.293702	0.788808	0.989345	576
mmu-miR-429-3p	0.767346	0.827073	0.441267	0.173653	-1.1894	-0.250238	0.739875	0.989345	577
mmu-miR-488-3p	0.168812	0.15507	0.150559	0.148833	-1.19472	-0.256672	0.749984	0.989345	578
mmu-miR-1193-3p	5.01706	2.08608	7.3123	1.12303	1.24535	0.316548	0.808162	0.989345	579
mmu-miR-200b-3p	2.25161	1.86611	2.16562	0.991858	1.2061	0.270348	0.764686	0.989345	580
mmu-miR-181a-2-3p	101.989	87.5182	74.8729	96.3782	1.20385	0.267656	0.76431	0.989345	581
mmu-miR-380-5p	0.483843	0.446644	0.83804	0.77361	-1.26993	-0.344753	0.847008	0.989345	582
mmu-miR-7669-5p	1.19729	1.31171	0.733446	0.359611	-1.22277	-0.290155	0.794255	0.989345	583
mmu-miR-874-5p	7.48027	9.61203	5.37035	8.17653	-1.16485	-0.220148	0.733048	0.989345	584
mmu-let-7f-1-3p	20.1145	21.8963	3.67014	7.5702	-1.14377	-0.193794	0.709908	0.989345	585
mmu-miR-770-3p	0.578849	0.457396	0.501298	0.528059	1.19572	0.257874	0.774646	0.989345	586
mmu-miR-483-3p	0.810088	2.61507	0.445318	4.32681	1.23499	0.304495	0.81288	0.989345	587
mmu-miR-25-3p	3085.25	2579.08	787.509	974.734	1.12058	0.164252	0.678825	0.989345	588
mmu-miR-671-5p	43.1124	48.3339	17.4374	35.7017	-1.16797	-0.224005	0.742775	0.989345	589
mmu-miR-6937-3p	0.0230401	0.0178658	0.0399067	0.0309444	-1.20237	-0.265885	0.783116	0.989345	590
mmu-miR-148b-5p	11.0253	12.1059	1.14278	3.19962	-1.14504	-0.195394	0.731084	0.989345	591
mmu-miR-3088-3p	0.207361	0.0535973	0.35916	0.0928332	1.18357	0.243142	0.77589	0.989345	592
mmu-miR-222-5p	25.0403	19.5364	6.74589	2.25335	1.1392	0.188016	0.728545	0.989345	593
mmu-miR-6967-5p	0.230118	0.365142	0.287294	0.542266	-1.19542	-0.257519	0.790289	0.989345	594
mmu-miR-339-5p	361.501	424.011	194.515	486.54	1.15404	0.206687	0.746651	0.989345	595
mmu-miR-7219-3p	0.99719	1.36948	0.386223	0.676967	-1.21244	-0.277913	0.808123	0.989345	596
mmu-miR-342-5p	36.5924	40.9478	15.333	41.8766	1.14885	0.200187	0.753749	0.989345	597
mmu-miR-147-5p	23.9054	23.0469	16.8487	13.4696	-1.17355	-0.230877	0.778303	0.989345	598
mmu-miR-6399	0.473915	0.248653	0.223566	0.22843	1.18157	0.240705	0.788213	0.989345	599
mmu-miR-34a-5p	7710.22	5934.5	4120.74	3005.5	1.14433	0.194507	0.755879	0.989345	600
mmu-miR-146a-5p	14528.7	10306.5	11332.8	6848.7	1.20033	0.263428	0.804128	0.989345	601
mmu-miR-410-3p	0.230401	0.0535973	0.399067	0.0928332	1.22513	0.292931	0.842481	0.989345	602
mmu-miR-26a-2-3p	31.3516	22.6753	25.3027	8.17788	1.13748	0.185845	0.746115	0.989345	603
mmu-miR-434-3p	35.1369	18.0253	49.8303	9.2391	-1.2089	-0.273696	0.818137	0.989345	604
mmu-miR-455-3p	69.5898	49.8637	52.9046	26.5651	1.14232	0.191971	0.771127	0.989345	605
mmu-miR-466d-5p	0.437064	0.232255	0.448652	0.402277	1.21965	0.286467	0.848327	0.989345	606
mmu-miR-7067-3p	0.771512	1.03653	0.424112	1.34429	1.17735	0.235542	0.798344	0.989345	607
mmu-miR-466n-5p	0.437064	0.232255	0.448652	0.402277	1.21965	0.286467	0.848327	0.989345	608
mmu-miR-6994-3p	0.337456	0.178658	0.306223	0.309444	1.20797	0.272579	0.838271	0.989345	609
mmu-miR-1191a	9.51192	9.9347	1.64463	1.65393	-1.12751	-0.173146	0.761621	0.989345	610
mmu-miR-223-3p	8.89117	8.43949	5.27534	2.17433	-1.1414	-0.190804	0.78301	0.989345	611
mmu-miR-192-3p	2.05741	1.9203	0.841661	1.45487	1.15763	0.211174	0.792732	0.989345	612
mmu-miR-345-5p	81.2925	97.0141	15.5813	69.1893	-1.11332	-0.154863	0.759858	0.989345	613
mmu-miR-142a-5p	0.529082	0.527116	0.325632	0.261907	-1.21681	-0.283105	0.872932	0.989345	614
mmu-miR-6910-3p	1.19584	0.829034	1.26514	0.58095	1.17436	0.23187	0.817293	0.989345	615
mmu-miR-337-5p	5.42132	3.10192	7.12894	2.86983	1.18744	0.247858	0.832022	0.989345	616
mmu-miR-6963-3p	0.321289	0.389106	0.253096	0.290834	-1.18109	-0.240123	0.829063	0.989345	617
mmu-miR-100-5p	246.886	215.476	105.291	114.779	1.10963	0.150083	0.764218	0.989345	618
mmu-miR-669l-3p	0.399842	0.382791	0.348522	0.168755	-1.17694	-0.235047	0.828406	0.989345	619
mmu-miR-3102-3p.2-3p	3.04644	3.19497	1.56469	3.10772	1.15063	0.202427	0.798664	0.989345	620
mmu-miR-3057-5p	6.59753	5.98869	4.78432	5.66007	1.14043	0.189572	0.790613	0.989345	621
mmu-miR-700-5p	31.37	33.8981	12.4755	20.7413	-1.10783	-0.147738	0.762472	0.989345	622
mmu-miR-3060-3p	7.40421	8.19556	1.97881	6.84704	1.1213	0.16517	0.782161	0.989345	623
mmu-miR-7033-5p	0.13223	0.034178	0.22903	0.059198	1.17311	0.230337	0.832269	0.989345	624
mmu-miR-147-3p	116.276	76.4212	117.266	47.7862	1.1527	0.205012	0.823534	0.989345	625
mmu-miR-6981-3p	0.468108	0.548895	0.313134	0.383241	-1.14368	-0.193688	0.816054	0.989345	626
mmu-miR-7052-3p	0.605781	0.307631	0.675525	0.268412	1.15666	0.209968	0.832006	0.989345	627
mmu-miR-1249-3p	9.77954	11.3262	2.78046	11.2632	1.12002	0.16352	0.792022	0.989345	628
mmu-miR-7042-5p	1.18221	0.732648	1.31682	0.224632	1.14493	0.195255	0.825768	0.989345	629
mmu-miR-667-5p	0.299522	0.165887	0.518787	0.147734	-1.16218	-0.216831	0.838846	0.989345	630
mmu-miR-450b-3p	31.8693	29.6111	19.3945	12.312	-1.11011	-0.150697	0.791346	0.989345	631
mmu-miR-128-3p	421.026	413.257	155.092	125.716	-1.08652	-0.119709	0.771157	0.989345	632
mmu-miR-92b-3p	4.56334	4.36422	1.56146	2.86913	1.12978	0.176043	0.81433	0.989345	633
mmu-miR-467e-5p	35.0162	39.0911	7.13934	21.9773	-1.12733	-0.172912	0.812219	0.989345	634
mmu-miR-669l-5p	2.42019	1.89696	1.13609	0.826818	-1.13104	-0.17765	0.82482	0.989345	635
mmu-miR-6953-3p	0.184321	0.0535973	0.319253	0.0928332	1.14421	0.194348	0.842065	0.989345	636
mmu-miR-29b-2-5p	17.8909	14.5905	7.505	4.91089	1.09912	0.136351	0.791152	0.989345	637
mmu-miR-143-5p	6.15072	3.9679	9.03169	4.89156	1.19451	0.256419	0.900414	0.989345	638
mmu-miR-26b-3p	7.86978	8.49943	4.06845	4.3118	-1.10831	-0.148364	0.800828	0.989345	639
mmu-miR-148a-5p	6.09035	7.89922	3.85667	6.94922	-1.13865	-0.187319	0.837819	0.989345	640
mmu-miR-24-3p	15027.7	14682.9	3275.22	4099.92	-1.08031	-0.111441	0.780352	0.989345	641
mmu-miR-362-5p	51.8705	42.8224	15.2108	10.9004	1.08905	0.123068	0.789312	0.989345	642
mmu-miR-30c-2-3p	81.9146	80.8786	13.5997	16.1806	-1.09892	-0.13609	0.796889	0.989345	643
mmu-miR-1933-3p	0.575436	0.402056	0.553588	0.107931	-1.13104	-0.177648	0.838472	0.989345	644
mmu-miR-22-3p	2056.29	1678.12	720.481	620.949	1.09442	0.130164	0.79467	0.989345	645
mmu-miR-345-3p	195.083	188.18	53.6491	37.1693	-1.09187	-0.126795	0.794669	0.989345	646
mmu-miR-30b-3p	26.0699	25.0387	2.33631	2.65933	-1.09907	-0.136289	0.806967	0.989345	647
mmu-miR-409-3p	25.9447	11.3368	35.3456	7.02961	1.14001	0.189041	0.866095	0.989345	648
mmu-miR-467c-5p	41.8412	34.085	13.7211	4.42997	1.08894	0.122918	0.803433	0.989345	649
mmu-miR-296-3p	72.1789	59.5272	29.5039	26.2321	1.0912	0.125914	0.810717	0.989345	650
mmu-miR-128-1-5p	1.34307	1.09779	1.02614	0.766483	1.11742	0.160177	0.844666	0.989345	651
mmu-let-7a-2-3p	0.731039	0.582848	0.486381	0.593813	1.12798	0.173744	0.858667	0.989345	652
mmu-miR-6239	0.184321	0.200437	0.319253	0.259919	-1.12061	-0.164285	0.859225	0.989345	653
mmu-miR-6971-3p	0.707486	0.882696	0.472392	1.02877	1.11294	0.15437	0.862375	0.989345	654
mmu-miR-7226-3p	0.828179	0.944673	0.315778	0.991107	1.12886	0.174863	0.883351	0.989345	655
mmu-miR-6913-3p	0.829019	0.620358	0.829445	0.353486	-1.11122	-0.15214	0.86699	0.989345	656
mmu-miR-542-5p	25.9427	27.1941	19.0182	24.3888	1.10809	0.148075	0.859936	0.989345	657
mmu-miR-7679-3p	0.531302	0.964836	0.39388	1.52054	1.13091	0.177485	0.890458	0.989345	658
mmu-miR-465b-5p	0.618409	0.683104	0.432207	0.796512	-1.13848	-0.187104	0.896306	0.989345	659
mmu-miR-29c-5p	51.0384	45.789	26.66	8.57212	-1.07627	-0.106038	0.825065	0.989345	660
mmu-miR-155-5p	2382.93	2122.69	657.535	1202.38	1.09422	0.129906	0.843835	0.989345	661
mmu-miR-320-5p	0.747959	0.445256	0.845584	0.194825	1.10825	0.148278	0.874586	0.989345	662
mmu-miR-369-5p	8.15286	4.50459	12.2374	3.48511	-1.11505	-0.157105	0.890127	0.989345	663
mmu-miR-1839-5p	197.488	193.213	56.4909	71.2559	-1.08332	-0.115465	0.844353	0.989345	664
mmu-let-7c-1-3p	43.878	40.7464	30.256	30.8312	1.10201	0.140135	0.872051	0.989345	665
mmu-miR-134-5p	16.1314	9.89966	21.341	7.53408	-1.1089	-0.149124	0.889019	0.989345	666
mmu-miR-124-3p	1.24289	0.941727	1.24225	0.864601	-1.11204	-0.153215	0.891282	0.989345	667
mmu-miR-129-5p	126.951	109.483	114.328	89.7782	1.09497	0.130896	0.86848	0.989345	668
mmu-miR-143-3p	992.38	531.39	1442.21	484.833	-1.13404	-0.181466	0.911732	0.989345	669
mmu-miR-382-5p	37.5924	22.739	47.6646	15.1983	-1.10749	-0.14729	0.884107	0.989345	670
mmu-miR-195a-5p	470.686	492.676	48.6519	256.575	-1.08126	-0.112711	0.856744	0.989345	671
mmu-miR-7054-3p	0.820732	0.65609	0.258636	0.354235	1.09072	0.125279	0.869822	0.989345	672
mmu-miR-652-3p	520.513	497.291	116.024	281.455	1.06399	0.0894898	0.836522	0.989345	673
mmu-miR-421-5p	1.0427	0.544982	0.702469	0.290501	1.0998	0.137247	0.892882	0.989345	674
mmu-miR-214-3p	193.803	356.096	198.82	513.936	-1.1036	-0.142215	0.896294	0.989345	675
mmu-miR-23a-3p	11400.5	10441.5	2669.64	4989.43	1.05573	0.0782441	0.828403	0.989345	676
mmu-miR-6976-3p	0.196908	0.318336	0.17187	0.509419	1.10664	0.146191	0.898662	0.989345	677
mmu-miR-28a-5p	46.4837	37.7846	15.4308	0.499544	1.0659	0.0920666	0.849238	0.989345	678
mmu-miR-219a-1-3p	2.08948	1.62332	1.57696	0.639937	-1.07942	-0.110256	0.880834	0.989345	679
mmu-miR-93-5p	2576.11	2179.89	484.088	225.215	1.05766	0.0808717	0.843307	0.989345	680
mmu-miR-378c	28.1888	31.0452	2.7372	18.0595	-1.06625	-0.0925495	0.869645	0.989345	681
mmu-miR-381-3p	5.35472	3.29649	7.20536	1.75642	-1.09677	-0.13326	0.9058	0.989345	682
mmu-miR-6996-3p	0.690637	0.548895	0.601993	0.383241	-1.09255	-0.127698	0.90404	0.989345	683
mmu-miR-497a-5p	388.601	327.073	113.181	94.7769	1.05989	0.0839157	0.853813	0.989345	684
mmu-miR-700-3p	79.9635	59.9562	53.0621	32.478	1.07435	0.103459	0.884697	0.989345	685
mmu-miR-15b-5p	625.436	713.37	221.443	656.13	1.06647	0.0928391	0.876874	0.989345	686
mmu-miR-669b-5p	7.36342	6.83045	0.166095	1.77699	-1.06772	-0.0945379	0.886718	0.989345	687
mmu-miR-5125	0.879058	0.672678	0.288672	0.190332	1.07576	0.105355	0.8925	0.989345	688
mmu-miR-27b-5p	25.4986	24.6023	3.15864	2.53433	-1.05913	-0.0828744	0.866064	0.989345	689
mmu-miR-34c-5p	506.453	437.543	201.138	202.232	1.0655	0.0915249	0.883234	0.989345	690
mmu-miR-7080-5p	1.33588	1.00332	1.29177	0.87725	-1.09442	-0.130169	0.920611	0.989345	691
mmu-miR-299a-5p	11.0251	6.34444	14.0532	3.21439	1.08132	0.112788	0.916951	0.989345	692
mmu-miR-3066-3p	0.936074	1.06715	0.403356	0.822467	1.07571	0.105289	0.911598	0.989345	693
mmu-miR-329-5p	4.75173	3.54894	4.95626	4.51603	1.09051	0.125004	0.921328	0.989345	694
mmu-miR-1964-3p	3.39152	3.45689	1.93371	3.01308	1.06616	0.092419	0.904142	0.989345	695
mmu-miR-547-3p	0.230118	0.0893288	0.287294	0.154722	1.07553	0.105041	0.918371	0.989345	696
mmu-miR-505-5p	7.9418	9.25266	4.19631	9.14613	1.06338	0.0886596	0.896781	0.989345	697
mmu-miR-5123	9.73218	8.32535	3.20446	0.0975834	-1.05521	-0.0775239	0.892174	0.989345	698
mmu-miR-1947-5p	0.67525	0.478589	0.602236	0.432725	-1.06974	-0.0972619	0.919894	0.989345	699
mmu-miR-701-5p	14.8896	12.6744	0.164215	1.34726	1.05051	0.0710881	0.890245	0.989345	700
mmu-miR-344d-3-5p	2.06504	1.30908	1.99156	0.915088	1.06585	0.0920025	0.91573	0.989345	701
mmu-miR-6952-3p	0.629105	1.17198	0.288037	1.55255	-1.06513	-0.0910326	0.915352	0.989345	702
mmu-miR-6935-3p	0.352765	0.33687	0.178594	0.451443	1.07023	0.0979266	0.926801	0.989345	703
mmu-miR-129-2-3p	5.57341	2.79604	6.18735	1.73815	1.08322	0.11533	0.939058	0.989345	704
mmu-miR-140-3p	714.75	677.194	342.969	453.039	1.04374	0.0617625	0.894319	0.989345	705
mmu-miR-191-3p	9.4054	7.96106	5.81639	0.732992	-1.05173	-0.0727711	0.904656	0.989345	706
mmu-let-7b-3p	44.3056	62.9093	26.0312	71.3342	-1.05692	-0.0798676	0.916178	0.989345	707
mmu-miR-152-5p	8.66691	7.10055	4.85284	0.948402	-1.04846	-0.0682734	0.907925	0.989345	708
mmu-miR-145a-3p	6.58905	3.08244	10.7034	2.91255	1.07994	0.110951	0.952135	0.991595	709
mmu-miR-103-3p	10072.6	8547.43	3095.98	2281.46	1.04022	0.0568868	0.903097	0.989345	710
mmu-miR-485-3p	3.2013	1.70404	3.61342	1.2317	1.06724	0.0938846	0.941453	0.989799	711
mmu-miR-5615-3p	1.10424	1.20713	0.631584	1.28009	1.0668	0.0932934	0.939105	0.989345	712
mmu-miR-100-3p	0.401152	0.341552	0.492207	0.398256	-1.06535	-0.0913274	0.93345	0.989345	713
mmu-let-7d-3p	391.959	480.72	128.656	437.793	-1.04202	-0.0593875	0.909755	0.989345	714
mmu-miR-107-3p	504.336	439.508	109.258	89.4515	1.03696	0.0523562	0.903911	0.989345	715
mmu-miR-8112	0.927928	1.04419	0.234015	0.807451	-1.05645	-0.0792217	0.922015	0.989345	716
mmu-miR-374b-3p	2.61156	2.10958	1.47965	1.68788	1.06096	0.0853747	0.929813	0.989345	717
mmu-miR-22-5p	101.854	91.9977	12.8895	37.8155	1.04312	0.0608988	0.919305	0.989345	718
mmu-miR-669m-5p	13.4996	12.5225	0.304507	3.25782	-1.04455	-0.0628755	0.92071	0.989345	719
mmu-miR-3473d	0.27634	0.285852	0.276482	0.49511	-1.0556	-0.0780577	0.932185	0.989345	720
mmu-miR-7654-5p	0.830251	1.0216	0.771304	1.08567	-1.05229	-0.0735273	0.929468	0.989345	721
mmu-miR-300-3p	11.3086	8.0836	13.3831	9.17538	1.06207	0.086873	0.944733	0.991196	722
mmu-miR-196a-5p	4.24778	1.63082	5.02595	1.42376	1.06404	0.0895513	0.955736	0.991595	723
mmu-miR-374b-5p	180.794	164.201	69.2403	66.3844	1.03861	0.0546508	0.920649	0.989345	724
mmu-miR-6943-3p	0.13223	0.0683559	0.22903	0.118396	-1.06034	-0.0845207	0.95067	0.991595	725
mmu-miR-6911-3p	2.6697	2.50949	0.762652	1.25315	1.04158	0.0587729	0.925442	0.989345	726
mmu-miR-532-5p	455.128	384.531	158.826	75.8071	1.03184	0.0452246	0.919884	0.989345	727
mmu-miR-466f	1.01994	0.455653	1.2684	0.156729	1.04519	0.0637671	0.942113	0.989799	728
mmu-miR-7063-3p	0.932226	1.0752	0.274586	0.862173	-1.04098	-0.0579485	0.938428	0.989345	729
mmu-miR-677-5p	5.69035	4.30722	1.12517	2.029	1.03847	0.0544616	0.935477	0.989345	730
mmu-miR-466g	0.398988	0.407151	0.193542	0.216405	1.05163	0.0726282	0.958785	0.991595	731
mmu-miR-181a-1-3p	334.71	382.723	108.596	304.628	-1.0316	-0.0448864	0.928177	0.989345	732
mmu-miR-664-3p	110.118	166.651	26.1198	205.229	1.03553	0.0503701	0.935997	0.989345	733
mmu-miR-30d-5p	4461.74	4382.51	1582.94	2335.24	-1.0279	-0.0397025	0.927919	0.989345	734
mmu-miR-23b-3p	4724.31	4497.84	1326.81	2424.73	1.02523	0.0359451	0.924681	0.989345	735
mmu-miR-103-2-5p	1.14946	1.53793	0.519723	1.3647	-1.03551	-0.0503414	0.949858	0.991595	736
mmu-miR-10a-5p	12022.7	11455.8	3884.35	4551.79	-1.02341	-0.0333817	0.935557	0.989345	737
mmu-miR-199b-5p	2.45591	2.43309	0.970796	0.487999	-1.03488	-0.0494684	0.960731	0.991595	738
mmu-miR-3075-5p	0.222047	0.165493	0.192733	0.286643	-1.03669	-0.0519914	0.965082	0.991595	739
mmu-miR-541-5p	54.1727	31.1295	58.9166	17.4401	1.03125	0.0443961	0.960427	0.991595	740
mmu-miR-668-3p	0.400171	0.165493	0.693116	0.286643	1.03291	0.046715	0.965772	0.991595	741
mmu-miR-7070-3p	3.71948	2.01206	4.12653	0.754405	1.02975	0.0422882	0.962644	0.991595	742
mmu-miR-130b-3p	128.202	139.89	31.2263	101.455	-1.01947	-0.0278226	0.958391	0.991595	743
mmu-miR-151-5p	354.36	337.156	64.638	151.41	1.01768	0.025282	0.951124	0.991595	744
mmu-miR-669p-3p	2.23966	1.84299	1.42637	0.503376	-1.02583	-0.0367918	0.963935	0.991595	745
mmu-miR-433-3p	3.20158	2.65737	4.7556	2.68586	-1.03237	-0.0459647	0.979962	0.998665	746
mmu-miR-425-3p	54.5315	50.2316	24.9155	23.6883	-1.01824	-0.0260738	0.959025	0.991595	747
mmu-miR-3061-5p	0.605923	0.984318	0.435415	1.30954	-1.02564	-0.0365216	0.970803	0.99543	748
mmu-miR-361-3p	146.226	146.972	64.1519	101.664	-1.01787	-0.0255569	0.961241	0.991595	749
mmu-miR-221-5p	67.9627	60.9106	19.3375	16.9786	1.01728	0.0247116	0.96342	0.991595	750
mmu-miR-7073-5p	0.418458	0.278298	0.375828	0.28204	-1.01847	-0.0264043	0.980665	0.998665	751
mmu-miR-7059-3p	0.168728	0.0893288	0.153112	0.154722	1.01814	0.0259359	0.979217	0.998665	752
mmu-miR-3074-1-3p	0.475697	0.290948	0.427958	0.29486	1.01761	0.0251781	0.982172	0.998665	753
mmu-miR-1197-3p	0.115201	0.0535973	0.199533	0.0928332	-1.01708	-0.0244295	0.984141	0.998665	754
mmu-miR-674-5p	60.7759	54.8724	18.1544	13.5297	-1.00799	-0.0114832	0.979143	0.998665	755
mmu-miR-329-3p	1.81	1.33065	2.64993	1.29566	-1.01631	-0.0233375	0.986702	0.998665	756
mmu-miR-667-3p	1.47428	1.05187	2.09367	0.994359	1.0151	0.021626	0.987704	0.998665	757
mmu-miR-466f-5p	3.05981	1.36696	3.80521	0.470187	-1.01047	-0.015021	0.986028	0.998665	758
mmu-miR-193b-3p	0.911453	0.506823	0.910986	0.138428	1.01176	0.0168704	0.986793	0.998665	759
mmu-miR-379-3p	2.66624	1.15845	3.95193	1.12841	-1.01194	-0.0171276	0.991285	0.998665	760
mmu-miR-6899-3p	2.75108	2.67062	0.995397	1.56635	-1.00782	-0.0112422	0.988697	0.998665	761
mmu-miR-7042-3p	0.920339	0.809207	0.173188	0.20241	-1.00591	-0.00850694	0.99112	0.998665	762
mmu-miR-666-5p	0.161281	0.071463	0.279347	0.123778	1.00464	0.00667444	0.995475	0.998665	763
mmu-miR-210-3p	95.2686	91.3821	15.1067	31.477	-1.00402	-0.0057818	0.992195	0.998665	764
mmu-miR-3110-5p	2.23993	1.4969	2.24135	1.02858	-1.00338	-0.00486365	0.995659	0.998665	765
mmu-miR-127-3p	120.265	59.2539	154.939	30.7514	-1.00163	-0.00234497	0.998	0.998665	766
mmu-miR-322-5p	743.818	683.453	115.79	189.651	1.00125	0.00180015	0.996649	0.998665	767
mmu-miR-1949	3.32872	2.62554	1.42542	1.07185	-1.00083	-0.0011951	0.998665	0.998665	768

[truncated: 2 more sheets: ALL miRs Plasma Prog-Tg vs WT, ALL miRs Plasma LA-Tg vs WT]
